# Supplementary material for: Control of ciliary transcriptional programs during spermatogenesis by antagonistic transcription factors
Source: eLife. 2025 Feb 26;13:RP94754. doi: 10.7554/eLife.94754 (PMC11864758; doi:10.7554/eLife.94754)
Supplement: Supplementary file 1. [file elife-94754-supp1.xlsx]

## Sheet: DE genes in Xap5l KO sperm
Gene Symbol	Regulated
2022-03-10	up
2022-03-11	up
2022-09-03	up
2022-09-06	down
2022-09-07	down
2022-09-12	up
0610033M10Rik	down
1500009C09Rik	up
1600025M17Rik	up
1700001F09Rik	up
1700001G11Rik	up
1700001J03Rik	up
1700001J11Rik	up
1700001L19Rik	up
1700001O22Rik	up
1700001P01Rik	up
1700003H04Rik	up
1700003N22Rik	up
1700007E05Rik	up
1700007G11Rik	up
1700007K09Rik	up
1700007K13Rik	up
1700008A23Rik	up
1700008B11Rik	up
1700008K24Rik	up
1700008O03Rik	up
1700010H22Rik	up
1700010I14Rik	up
1700010K23Rik	up
1700010N08Rik	up
1700011I03Rik	up
1700011L22Rik	up
1700012B07Rik	up
1700012B09Rik	up
1700012D16Rik	up
1700012P22Rik	up
1700013H16Rik	up
1700014D04Rik	up
1700016A09Rik	up
1700016D06Rik	up
1700016G14Rik	up
1700016K19Rik	up
1700017D01Rik	up
1700017L05Rik	up
1700017N19Rik	up
1700018A04Rik	up
1700018B08Rik	up
1700018F24Rik	up
1700019A02Rik	up
1700019G24Rik	up
1700020D05Rik	up
1700020G17Rik	up
1700020L24Rik	up
1700021F07Rik	up
1700021N21Rik	up
1700023F02Rik	up
1700023H06Rik	up
1700024G13Rik	up
1700024J04Rik	up
1700025A08Rik	up
1700025B11Rik	up
1700025F22Rik	up
1700025J12Rik	up
1700026D11Rik	up
1700027A15Rik	up
1700028I16Rik	up
1700028J19Rik	up
1700028P14Rik	up
1700028P15Rik	up
1700029E06Rik	up
1700029H14Rik	up
1700030J22Rik	up
1700030M09Rik	up
1700030N03Rik	up
1700030O20Rik	up
1700031F10Rik	up
1700031L13Rik	up
1700031P21Rik	up
1700034H15Rik	up
1700034J05Rik	up
1700036G14Rik	up
1700037H04Rik	up
1700041C23Rik	up
1700047G07Rik	up
1700049E17Rik1	up
1700049E22Rik	up
1700049L16Rik	up
1700051O22Rik	up
1700052I22Rik	up
1700054A03Rik	up
1700054O19Rik	up
1700061G19Rik	up
1700063D05Rik	up
1700063I16Rik	up
1700067P10Rik	up
1700071M16Rik	up
1700073E17Rik	up
1700080E11Rik	up
1700080O16Rik	up
1700081H04Rik	up
1700086L19Rik	up
1700091H14Rik	up
1700092C10Rik	up
1700092E19Rik	up
1700094M24Rik	up
1700095A13Rik	up
1700095J12Rik	up
1700096J18Rik	up
1700099I09Rik	up
1700100L14Rik	up
1700101I19Rik	up
1700104B16Rik	up
1700105P06Rik	up
1700108J01Rik	up
1700108N11Rik	up
1700109H08Rik	up
1700110I01Rik	up
1700120G07Rik	up
1700121C08Rik	up
1700123K08Rik	up
1700123L14Rik	up
1700124L16Rik	up
1700125H20Rik	up
1700128E19Rik	up
1810020O05Rik	up
1810041H14Rik	down
1810055G02Rik	up
2010109I03Rik	up
2300002M23Rik	up
2410089E03Rik	up
2700023E23Rik	up
2700089I24Rik	down
2810025M15Rik	up
2810408I11Rik	up
2900092C05Rik	up
3110070M22Rik	up
3830417A13Rik	up
4732414G09Rik	down
4833427G06Rik	up
4921501E09Rik	up
4921504A21Rik	up
4921504E06Rik	up
4921509A06Rik	up
4921511C20Rik	up
4921511M17Rik	up
4921513D11Rik	up
4921521D15Rik	up
4921524L21Rik	up
4921534H16Rik	up
4922502D21Rik	up
4930402K13Rik	up
4930403D09Rik	up
4930404A12Rik	up
4930404I05Rik	up
4930405N21Rik	down
4930406D18Rik	up
4930415L06Rik	up
4930415O20Rik	up
4930422M22Rik	up
4930430A15Rik	up
4930432E11Rik	up
4930433I11Rik	up
4930440C22Rik	up
4930442L01Rik	up
4930442P19Rik	up
4930444G20Rik	up
4930444M15Rik	up
4930444P10Rik	up
4930448A20Rik	up
4930448K20Rik	up
4930449E01Rik	up
4930449I04Rik	up
4930449I24Rik	up
4930451E10Rik	up
4930451I11Rik	up
4930453L07Rik	up
4930458B22Rik	up
4930458D05Rik	up
4930465I24Rik	up
4930471C04Rik	up
4930471D02Rik	up
4930474H06Rik	up
4930474N05Rik	up
4930479D17Rik	up
4930480E11Rik	up
4930483J18Rik	up
4930483K19Rik	up
4930488L21Rik	up
4930488N24Rik	up
4930502E18Rik	down
4930503E14Rik	up
4930504O13Rik	up
4930505O20Rik	up
4930507D05Rik	up
4930513N10Rik	up
4930515B02Rik	up
4930517J16Rik	up
4930518J21Rik	up
4930519F16Rik	up
4930519G04Rik	up
4930519H02Rik	up
4930520M14Rik	up
4930522H14Rik	up
4930524N10Rik	up
4930526A20Rik	up
4930527E20Rik	up
4930527J03Rik	up
4930528D03Rik	up
4930532M18Rik	up
4930540M05Rik	up
4930544D05Rik	up
4930544G11Rik	up
4930544L04Rik	up
4930545L23Rik	up
4930550C14Rik	up
4930550L24Rik	up
4930557F10Rik	up
4930558C23Rik	up
4930558N11Rik	up
4930562A09Rik	up
4930562C15Rik	up
4930562F07Rik	up
4930563E22Rik	up
4930563M21Rik	up
4930565N06Rik	up
4930568A12Rik	up
4930568D16Rik	up
4930572O03Rik	up
4930578I06Rik	up
4930579F01Rik	up
4930579M01Rik	up
4930589P08Rik	up
4930595M18Rik	up
4930596D02Rik	up
4931400O07Rik	up
4931409K22Rik	up
4931413K12Rik	up
4931417E11Rik	up
4931428L18Rik	up
4931431B13Rik	up
4931440F15Rik	up
4932411K12Rik	up
4932411N23Rik	up
4932415D10Rik	up
4932415M13Rik	up
4932416K20Rik	up
4932429P05Rik	up
4932438H23Rik	up
4932443L11Rik	up
4933400F21Rik	up
4933402N22Rik	up
4933405D12Rik	up
4933405O20Rik	up
4933406K04Rik	up
4933407K13Rik	up
4933411G06Rik	up
4933413C19Rik	up
4933416C03Rik	up
4933417D19Rik	up
4933417O13Rik	up
4933421I07Rik	up
4933424G06Rik	up
4933424N20Rik	up
4933425D22Rik	up
4933427E11Rik	up
4933428M09Rik	up
4933429H19Rik	up
4933430I17Rik	up
4933430L12Rik	up
4933431C10Rik	up
4933434M16Rik	up
4933439C10Rik	up
4933440M02Rik	up
5031410I06Rik	up
5330417C22Rik	up
5430427O19Rik	down
6820408C15Rik	up
8030474K03Rik	up
8430422M14Rik	up
A2m	up
A530020G20Rik	up
A630023A22Rik	up
A630095N17Rik	up
A930018P22Rik	up
A930030B08Rik	up
Aak1	up
Aamp	up
Aars2	up
AB124611	down
Abat	down
Abca14	up
Abca16	up
Abcb9	up
Abcc12	up
Abcg2	up
Abhd16b	up
Abhd8	up
Abl1	up
Ablim3	up
AC025913.4	up
AC061963.3	up
AC104834.1	up
AC105169.2	up
AC107819.2	up
AC115785.1	up
AC117570.1	up
AC121872.1	up
AC122371.1	up
AC124421.2	up
AC125361.1	up
AC125535.1	up
AC126257.4	up
AC129304.2	up
AC131759.1	up
AC132384.14	up
AC132384.16	up
AC135633.1	up
AC138292.1	down
AC140314.2	up
AC140363.2	up
AC148328.1	up
AC153144.3	up
AC153357.2	up
AC153379.2	up
AC153512.1	up
AC153544.1	up
AC153562.1	up
AC154808.1	up
AC157085.1	up
AC158589.1	up
AC158804.2	up
AC159272.1	up
AC159462.3	up
AC159627.1	up
AC159710.1	up
AC160028.3	up
AC160051.3	up
AC160060.4	up
AC160334.3	up
AC160394.5	up
AC163703.1	up
AC164625.1	up
AC165442.1	up
AC166263.2	up
AC166902.3	up
AC173210.4	up
Acbd7	down
Ace	up
Ace3	up
Acod1	down
Acot10	up
Acot7	up
Acpt	up
Acr	up
Acrbp	up
Acrv1	up
Acsl6	up
Actg2	up
Actl10	up
Actl11	up
Actl7b	up
Adad1	up
Adam18	up
Adam1b	up
Adam2	up
Adam20	up
Adam24	up
Adam25	up
Adam26a	up
Adam26b	up
Adam3	up
Adam30	up
Adam32	up
Adam39	up
Adam4	up
Adam5	up
Adamts14	down
Adcy10	up
Adgb	up
Adgre4	down
Adgrf3	up
Adgrl3	up
Adgrv1	up
Adh4	up
Adh6b	down
Adipoq	up
Afm	up
Agbl4	up
Agtpbp1	up
Agtr1a	up
Ahi1	up
AI429214	up
AI480526	up
Aif1	up
Aire	up
Ak8	up
Akap1	up
Akap12	up
Akap14	up
Akap3	up
Akap4	up
Akap6	up
Akap8l	up
Akp3	up
Akp-ps1	up
Aldh3b1	up
Aldoart2	up
Aldob	up
Alkbh3os1	up
Allc	up
Alox15	down
Alox5ap	down
Als2cr11	up
Als2cr11b	up
Als2cr12	up
Amer2	up
Amn	up
Amph	up
Angel1	up
Ank2	up
Ankar	up
Ankrd42	up
Ankrd45	up
Ankrd53	up
Ankrd61	up
Ankrd7	up
Aox3	up
Aox4	up
Ap4m1	up
Apobec4	up
Apoc2	down
Apoh	up
Apol7b	up
Apol7c	up
Apol7e	up
Aprt	up
Aqp7	up
Arc	up
Arhgap29	up
Arhgef2	up
Arid3a	up
Arl13b	up
Arl4aos	up
Armc2	up
Armc3	up
Armc4	up
Arrdc5	up
Arxes1	down
Asb4	up
Asb9	up
Asnsd1	up
Astx3	up
Asxl3	up
Atf7ip2	up
Atg9a	up
Atl3	up
Atoh8	up
Atp10a	up
Atp1a2	down
Atp1a4	up
Atp6ap1l	up
Atp6v1e2	up
Atp8b3	up
Atp9b	up
Atxn2l	up
AU021092	down
AV320801	up
Aven	up
Axdnd1	up
AY702102	up
AY702103	up
B4galnt3	up
B9d1	up
Bag6	up
Bbof1	up
Bbs7	up
BC022687	up
BC022960	up
BC024978	up
BC030867	up
BC048502	up
BC049715	up
BC051142	up
BC061237	up
Bean1	up
Best1	up
Bex2	down
Bex4	down
Bglap3	up
Bhmt	down
Bpifb3	up
Bpifc	down
Brdt	up
Brip1	up
Brsk1	up
Brsk2	up
Bsph2	up
Btbd16	up
Btbd35f1	up
Btbd35f10	up
Btbd35f11	up
Btbd35f13	up
Btbd35f14	up
Btbd35f15	up
Btbd35f16	up
Btbd35f17	up
Btbd35f18	up
Btbd35f19	up
Btbd35f2	up
Btbd35f20	up
Btbd35f21	up
Btbd35f22	up
Btbd35f23	up
Btbd35f24	up
Btbd35f25	up
Btbd35f27	up
Btbd35f28	up
Btbd35f29	up
Btbd35f3	up
Btbd35f30	up
Btbd35f4	up
Btbd35f5	up
Btbd35f6	up
Btbd35f9	up
Btg1-ps1	up
Bub1	up
C130026I21Rik	down
C1qtnf4	up
C530008M17Rik	up
C5ar1	down
Cacna1a	up
Cacna1b	up
Cacna1c	up
Cacna1g	up
Cacna1h	up
Cacng5	up
Cadm1	up
Cage1	up
Camk1g	up
Camsap1	up
Capza3	up
Car14	down
Carlr	up
Casc1	up
Casq1	up
Cast	up
Catip	up
Catsper1	up
Catsper3	up
Catsper4	up
Catsperb	up
Catsperz	up
Cbx3	down
Ccdc103	up
Ccdc105	up
Ccdc110	up
Ccdc113	up
Ccdc116	up
Ccdc127	down
Ccdc13	up
Ccdc146	up
Ccdc150	up
Ccdc151	up
Ccdc154	up
Ccdc158	up
Ccdc171	up
Ccdc173	up
Ccdc175	up
Ccdc178	up
Ccdc181	up
Ccdc182	up
Ccdc183	up
Ccdc184	up
Ccdc189	up
Ccdc27	up
Ccdc30	up
Ccdc33	up
Ccdc36	up
Ccdc42	up
Ccdc60	up
Ccdc62	up
Ccdc63	up
Ccdc65	up
Ccdc70	up
Ccdc7b	up
Ccdc81	up
Ccdc83	up
Ccdc87	up
Ccdc89	up
Ccdc92	up
Ccdc96	up
Ccer1	up
Ccl1	up
Ccl24	down
Ccl4	down
Ccl5	down
Ccl7	down
Ccnb1	up
Ccnb2	up
Ccrl2	down
Ccsap	up
Cct6b	up
Cd14	down
Cd163	down
Cd209a	down
Cd300ld	down
Cd3d	up
Cd40lg	down
Cd55b	up
Cd83	down
Cd86	down
Cd93	down
Cd96	up
Cdc25a	up
Cdc25c	up
Cdh12	up
Cdh18	up
Cdhr4	up
Cdkl1	up
Cdkl3	up
Cdkn2aip	up
Cdkn3	up
Cdyl2	up
Ceacam2	up
Cebpb	down
Celf3	up
Celf6	up
Cemip	up
Cenpn	up
Cenpp	up
Cep112os1	up
Cep126	up
Cep290	up
Cep55	up
Cep63	up
Cep72	up
Cep85l	up
Cep89	up
Ces1a	up
Cetn1	up
Cfap100	up
Cfap157	up
Cfap206	up
Cfap221	up
Cfap45	up
Cfap52	up
Cfap57	up
Cfap58	up
Cfap61	up
Cfap73	up
Cfap77	up
Cftr	up
Chaf1a	up
Chchd6	up
Chd5	up
Chek1	up
Chit1	up
Chn1	up
Chrna5	up
Chrna7	up
Chrna9	up
Chrne	up
Chtf18	up
Ckap2l	up
Ckm	up
Cldn11	down
Cldn34b1	up
Cldn34b3	up
Cldn34b4	up
Cldn34c4	up
Cldn34d	up
Cldn34-ps	up
Cldnd2	up
Clec10a	down
Clec1b	down
Clec4a1	down
Clec4a3	down
Clec4d	down
Clec4e	down
Clec7a	down
Clgn	up
Clip1	up
Clip4	up
Clk3	up
Clk4	up
Clpx	up
Clstn3	up
Clta	down
Cmtm2a	up
Cmtm2b	up
Cnbd1	up
Cnga4	up
Cnih1	down
Cntn6	up
Coil	up
Col19a1	up
Col22a1	up
Col2a1	up
Col5a1	up
Col6a4	up
Col7a1	up
Comp	up
Coq6	up
Cox6b2	up
Cpeb2	up
Cpt1b	up
Cpt1c	up
Cpvl	up
CR974485.1	up
Creb3l4	up
Creld2	up
Crlf1	up
Crtam	up
Csf3r	down
Csl	up
Csmd3	up
Csnka2ip	up
Cstf1	up
Cstl1	up
CT010456.4	up
CT025660.2	up
CT030137.1	up
Ctag2	up
Ctla2a	down
Ctnna3	up
Ctsc	down
Ctsk	up
Cxcl1	down
Cxcl2	down
Cxcr2	down
Cyp11a1	down
Cyp2c38	down
Cyp2c39	down
Cyp4f39	up
Cypt2	up
Cytl1	up
D11Wsu47e	up
D16Ertd472e	up
D730045B01Rik	up
Dancr	down
Dbn1	up
Dbndd1	up
Dchs1	up
Dcp1b	up
Dcst1	up
Dcst2	up
Ddhd1	up
Ddi1	up
Ddx20	up
Ddx25	up
Ddx4	up
Dedd	up
Defb18	down
Defb19	down
Dennd4b	up
Dgkh	up
Dhx58	up
Dip2b	up
Dis3	up
Dis3l	up
Dkkl1	up
Dlec1	up
Dmrta2	up
Dmrtb1	up
Dmtn	up
Dnaaf1	up
Dnah1	up
Dnah10	up
Dnah17	up
Dnah3	up
Dnah5	up
Dnah6	up
Dnaic1	up
Dnajb13	up
Dnajb3	up
Dnajb7	up
Dnajc27	up
Dnajc5g	up
Dnal4	up
Dnali1	up
Dnmt3l	up
Dock3	up
Donson	up
Dot1l	up
Dpep3	up
Dpf3	up
Dpy19l2	up
Dpysl2	up
Dpysl3	up
Drc1	up
Drc3	up
Drc7	up
Dscam	up
Dscc1	up
Dsg1a	up
Dsg1b	up
Dst	up
Dusp13	up
Dusp15	up
DXBay18	up
Dydc1	up
Dynlrb2	up
Dynlt1a	up
Dynlt1b	up
Dynlt1c	up
Dynlt1-ps1	up
Dyrk3	up
Dysf	up
E030037K01Rik	up
E130102H24Rik	down
E330034G19Rik	up
Ebf2	up
Echdc1	down
Ecm1	down
Ednrb	down
Efcab10	up
Efcab12	up
Efcab3	up
Efcab5	up
Efcab6	up
Efcab9	up
Efhb	up
Efhc1	up
Efhc2	up
Efhd1	up
Ehbp1l1	up
Eid3	up
Elfn1	up
Elovl2	up
Eml6	up
Enkd1	up
Enkur	up
Eno4	up
Enthd1	up
Epha6	up
Ephx4	up
Eps8l3	up
Epyc	up
Eqtn	up
Erdr1	up
Erich3	up
Erich6	up
Erich6b	up
Esrrb	up
Etv2	up
Evi2a	down
Evi2b	down
Exoc3l4	up
Exosc5	up
Eya1	up
Ezh2	up
F12	up
F13a1	down
Fa2h	up
Fabp3	down
Fam118a	up
Fam124b	up
Fam126a	up
Fam131b	up
Fam134b	up
Fam135b	up
Fam170a	up
Fam170b	up
Fam178b	up
Fam183b	up
Fam184a	up
Fam186a	up
Fam187a	up
Fam205a1	up
Fam205c	up
Fam208b	up
Fam209	up
Fam20a	up
Fam210b	down
Fam217a	up
Fam221b	up
Fam227a	up
Fam228b	up
Fam229a	up
Fam229b	up
Fam24a	up
Fam3b	up
Fam46d	up
Fam47c	up
XAP5L	down
Fam69b	up
Fam71e1	up
Fam71e2	up
Fam71f2	up
Fam81b	up
Fam98c	up
Fancd2	up
Fancd2os	up
Fat3	up
Faxc	down
Fbp1	up
Fbxl13	up
Fbxo46	up
Fbxw10	up
Fcer1g	down
Fcnaos	up
Fcrls	down
Fem1b	up
Fer1l4	up
Fer1l5	up
Fer1l6	up
Fgr	down
Flrt2	up
Fmn2	up
Fn1	down
Fndc11	up
Fndc3c1	up
Fosl2	down
Foxj1	up
Foxm1	up
Frat2	up
Frem3	up
Frs3os	up
Fscb	up
Fsip1	up
Fsip2	up
Fthl17a	up
Ftl1-ps1	down
Ftmt	up
Fundc1	down
Fundc2	down
Fxr1	up
Gabra5	up
Galntl6	up
Gapdhs	up
Gas2l1	down
Gch1	down
Gclm	down
Gcnt2	down
Gcnt3	up
Gemin4	up
Ggnbp1	up
Gja1	down
Gk2	up
Glb1l	up
Glb1l3	up
Glipr1l1	up
Glmp	down
Glp2r	up
Glt8d1	up
Gm10057	up
Gm10058	up
Gm10096	up
Gm10147	up
Gm10184	up
Gm10220	up
Gm10230	up
Gm10259	up
Gm10275	down
Gm10338	up
Gm10339	up
Gm10340	up
Gm10354	up
Gm10375	up
Gm10376	up
Gm10377	up
Gm10413	up
Gm10425	up
Gm10471	up
Gm10486	up
Gm10487	up
Gm10488	up
Gm10601	up
Gm10603	up
Gm10647	up
Gm11193	up
Gm11217	up
Gm11269	up
Gm11282	up
Gm1141	up
Gm11482	up
Gm11497	up
Gm11608	up
Gm11613	down
Gm11638	up
Gm11639	up
Gm11766	up
Gm11775	up
Gm11837	up
Gm11889	up
Gm11978	up
Gm11981	up
Gm11992	up
Gm12203	up
Gm12206	up
Gm12209	up
Gm12299	up
Gm12372	up
Gm12378	up
Gm12394	up
Gm12440	up
Gm12462	up
Gm12505	up
Gm12592	up
Gm12695	up
Gm128	up
Gm12945	up
Gm12992	up
Gm13146	down
Gm13184	up
Gm13201	up
Gm13267	up
Gm13398	up
Gm13408	down
Gm13570	up
Gm13857	up
Gm13872	up
Gm13941	up
Gm13942	up
Gm14025	up
Gm14285	up
Gm14320	down
Gm14367	up
Gm14424	up
Gm14459	up
Gm14525	up
Gm14590	up
Gm14594	up
Gm14595	up
Gm14596	up
Gm14597	up
Gm14598	up
Gm14625	up
Gm14632	up
Gm14781	up
Gm14819	up
Gm14828	up
Gm14891	up
Gm15066	up
Gm15083	down
Gm15130	up
Gm15140	up
Gm15143	up
Gm15229	up
Gm15533	down
Gm15590	down
Gm15601	up
Gm15653	up
Gm15672	up
Gm15756	up
Gm15852	up
Gm15873	up
Gm15886	up
Gm15904	up
Gm15931	down
Gm15964	up
Gm16130	up
Gm16153	up
Gm16159	up
Gm16163	up
Gm16185	up
Gm16252	up
Gm16325	up
Gm16387	up
Gm16404	up
Gm16405	up
Gm16430	up
Gm16434	up
Gm16445	up
Gm16486	up
Gm16506	up
Gm16534	up
Gm16541	up
Gm16555	up
Gm16677	up
Gm16907	up
Gm16982	up
Gm17019	up
Gm17026	up
Gm17078	up
Gm17079	up
Gm17108	up
Gm17124	up
Gm17174	up
Gm17175	up
Gm17202	up
Gm17224	up
Gm17359	up
Gm17654	up
Gm17727	up
Gm17733	down
Gm18562	up
Gm19026	up
Gm19461	up
Gm1979	up
Gm1982	up
Gm1988	up
Gm1993	up
Gm2012	up
Gm20268	up
Gm20389	up
Gm20517	up
Gm20557	up
Gm20605	up
Gm20611	up
Gm20708	down
Gm20854	up
Gm2098	up
Gm21083	up
Gm21115	up
Gm21129	up
Gm21136	up
Gm21142	up
Gm21149	up
Gm21190	up
Gm21241	up
Gm21276	up
Gm2128	up
Gm21560	up
Gm21655	up
Gm21663	up
Gm21671	up
Gm21680	up
Gm21698	up
Gm21754	up
Gm21847	up
Gm21955	up
Gm21977	up
Gm21981	down
Gm21992	up
Gm2237	up
Gm2449	up
Gm26541	down
Gm26571	up
Gm266	up
Gm26611	up
Gm26630	up
Gm26661	up
Gm26680	up
Gm26715	up
Gm26844	up
Gm26848	up
Gm26967	up
Gm2762	up
Gm2788	up
Gm28372	up
Gm28451	up
Gm28453	up
Gm28465	up
Gm28496	up
Gm28881	up
Gm2897	up
Gm29050	up
Gm29154	up
Gm29258	up
Gm29394	down
Gm29508	up
Gm29541	up
Gm2956	up
Gm29740	up
Gm29926	up
Gm29994	up
Gm3002	up
Gm3005	up
Gm3012	up
Gm3015	up
Gm3029	up
Gm3045	up
Gm30667	up
Gm3072	up
Gm3095	up
Gm3099	up
Gm3127	up
Gm3141	up
Gm3149	up
Gm31816	up
Gm3182	up
Gm3187	up
Gm3239	up
Gm33242	up
Gm3327	up
Gm3336	up
Gm3373	up
Gm3402	up
Gm3404	up
Gm3409	up
Gm3411	up
Gm3415	up
Gm3424	up
Gm3448	up
Gm3453	up
Gm3476	up
Gm34821	up
Gm3486	up
Gm3488	up
Gm35025	up
Gm35060	up
Gm35339	up
Gm35386	up
Gm3543	up
Gm35549	up
Gm3573	up
Gm3629	up
Gm3633	up
Gm3642	up
Gm3676	up
Gm36814	up
Gm3685	up
Gm36864	up
Gm3696	up
Gm37003	up
Gm371	up
Gm3739	up
Gm37422	up
Gm3760	up
Gm37683	up
Gm37795	up
Gm37893	up
Gm37945	up
Gm381	up
Gm38102	up
Gm382	up
Gm38215	up
Gm38342	up
Gm39566	up
Gm4181	up
Gm42467	up
Gm42477	up
Gm42505	up
Gm42529	up
Gm42531	up
Gm42558	up
Gm42574	up
Gm42609	up
Gm42618	up
Gm42654	up
Gm42669	up
Gm42706	down
Gm42742	down
Gm4275	up
Gm42868	up
Gm42878	up
Gm42916	up
Gm42918	up
Gm42987	up
Gm43025	up
Gm43030	up
Gm43253	up
Gm43280	up
Gm43391	up
Gm43474	up
Gm43579	up
Gm43619	up
Gm43784	up
Gm43971	up
Gm44222	down
Gm4454	up
Gm44570	up
Gm44829	up
Gm44904	up
Gm44994	up
Gm45035	up
Gm45142	up
Gm45298	up
Gm45321	up
Gm45396	up
Gm45463	up
Gm45521	up
Gm45565	up
Gm45604	up
Gm45649	down
Gm45707	up
Gm45716	down
Gm45763	up
Gm45768	up
Gm45831	up
Gm45848	up
Gm45861	up
Gm4691	up
Gm4746	up
Gm4764	up
Gm4779	up
Gm4836	up
Gm4868	up
Gm4871	up
Gm4884	up
Gm4907	up
Gm4922	up
Gm4985	up
Gm5073	up
Gm5092	up
Gm5099	up
Gm5114	up
Gm5123	up
Gm5128	up
Gm5142	up
Gm5152	up
Gm5169	up
Gm5174	up
Gm525	up
Gm5334	up
Gm5361	up
Gm5385	up
Gm5386	up
Gm5415	up
Gm5458	up
Gm553	up
Gm5541	down
Gm5554	up
Gm5565	up
Gm5591	up
Gm5592	up
Gm5608	up
Gm5615	down
Gm5640	up
Gm5641	down
Gm5645	up
Gm5656	down
Gm5681	up
Gm5755	up
Gm5766	up
Gm5795	up
Gm5796	up
Gm5797	up
Gm5798	up
Gm5799	up
Gm5800	up
Gm5861	up
Gm5862	up
Gm5912	up
Gm5913	up
Gm5936	up
Gm5947	up
Gm595	up
Gm609	up
Gm6117	up
Gm6121	up
Gm6124	up
Gm6185	up
Gm6309	up
Gm6327	up
Gm6345	down
Gm6370	up
Gm6377	down
Gm6401	up
Gm6408	up
Gm6455	up
Gm6460	up
Gm6465	up
Gm6482	up
Gm6526	up
Gm6569	up
Gm6588	up
Gm6605	up
Gm6611	up
Gm6647	up
Gm6650	up
Gm6660	up
Gm6664	up
Gm6676	up
Gm6744	up
Gm6811	up
Gm6818	up
Gm6819	up
Gm6866	up
Gm6880	up
Gm6890	up
Gm6981	up
Gm7103	up
Gm7135	up
Gm7168	up
Gm7173	up
Gm7233	up
Gm7275	up
Gm7337	up
Gm7347	up
Gm7353	up
Gm7356	up
Gm7358	up
Gm7361	up
Gm7386	up
Gm7391	up
Gm7408	up
Gm7415	up
Gm7438	up
Gm7461	up
Gm7556	up
Gm7627	up
Gm7672	up
Gm7876	up
Gm7903	up
Gm7945	up
Gm7950	up
Gm7951	up
Gm7958	up
Gm8005	up
Gm8011	up
Gm8020	up
Gm8024	up
Gm8068	up
Gm8093	up
Gm8094	up
Gm8122	up
Gm8126	up
Gm8127	up
Gm8138	up
Gm8159	up
Gm8165	up
Gm8180	up
Gm8212	up
Gm8220	up
Gm8229	up
Gm8232	up
Gm8246	up
Gm8247	up
Gm8257	up
Gm8267	up
Gm8279	up
Gm8297	up
Gm8342	up
Gm8356	up
Gm8362	up
Gm8703	up
Gm884	up
Gm8857	up
Gm8871	up
Gm8879	up
Gm8890	up
Gm8897	up
Gm8922	up
Gm8926	up
Gm8995	down
Gm9172	up
Gm9220	up
Gm9239	up
Gm9244	up
Gm9271	up
Gm9530	down
Gm9602	up
Gm9611	up
Gm973	up
Gm9758	up
Gm9806	up
Gm9828	up
Gm9839	up
Gm9844	up
Gm9870	up
Gm9877	up
Gm9887	up
Gng3	up
Golga7b	up
Got1l1	up
Gpat3	up
Gpn1	up
Gpr132	down
Gpr141	down
Gpr156	up
Gpr162	up
Gpx3	down
Grid1	up
Grin2d	up
Grin3b	up
Grip1	up
Grk4	up
Grm1	up
Gsdmcl-ps	up
Gsg2	up
Gsta2	down
Gstcd	up
Gstm1	down
Gstm2-ps1	down
Gstt4	up
Gtf2a1l	up
Gtsf1	up
Gtsf1l	up
Gykl1	up
Gzmn	up
H19	down
H2-Ab1	down
H2afb3	up
Hagh	up
Haglr	up
Haus5	up
Hbs1l	up
Hcar2	down
Hck	down
Hcn1	up
Hdgfl1	up
Heatr4	up
Heatr9	up
Hectd2	up
Hepacam	up
Herc4	up
Hipk4	up
Hist1h1t	up
Hist1h2bp	up
Hmgn5	down
Hoga1	up
Hpcal4	up
Hrasls	up
Hsf2	up
Hsf2bp	up
Hsf5	up
Hsfy2	up
Hspa2	up
Hspa4l	up
Hspb7	up
Htra4	down
Hyal5	up
Hyal6	up
Icam1	down
Icam5	up
Ifi204	down
Ifi207	down
Ifi211	down
Ifitm2	down
Ifitm3	down
Ifitm6	down
Ifitm7	up
Ift122	up
Ift43	up
Ift81	up
Igbp1b	up
Igf2bp1	up
Ighv12-3	down
Ighv1-26	down
Ighv1-85	down
Igkv12-89	down
Igkv5-43	down
Igsf6	down
Il11	up
Il17rd	up
Il18rap	down
Il1a	down
Il1b	down
Il31	up
Immp2l	up
Inpp1	up
Ints10	up
Iqca	up
Iqcd	up
Iqcf1	up
Iqcf3	up
Iqcf4	up
Iqcf5	up
Iqcg	up
Iqch	up
Iqck	up
Iqub	up
Irgc1	up
Irs4	up
Isoc1	down
Itga1	up
Itgad	up
Itgae	up
Itgam	down
Ivl	up
Izumo1	up
Izumo2	up
Izumo3	up
Jaml	down
Jhy	up
Jph3	up
Jph4	up
Junb	down
Katnal2	up
Katnb1	up
Kcnb1	up
Kcnc3	up
Kcne3	up
Kcnf1	up
Kcng1	up
Kcnj14	up
Kcnj6	up
Kcnk12	up
Kcnmb4os1	up
Kcnq2	up
Kcnq3	up
Kcnu1	up
Kctd19	up
Kdm4d	up
Kif17	up
Kif18b	up
Kif27	up
Kif2b	up
Kif2c	up
Kif3b	up
Kifap3	up
Klf17	up
Klhdc3	up
Klhl28	up
Klhl32	up
Klhl41	up
Klk1b1	down
Klk1b11	down
Klk1b26	down
Klk1b27	down
Klk1b5	down
Klra2	down
Klrb1	up
Klrb1b	down
Klrb1c	down
Klrd1	down
Klri2	down
Klrk1	down
Kpna2	up
Kpna6	up
Krt76	up
Krt88	up
Ksr2	up
L3mbtl1	up
Lad1	down
Lamb3	up
Lancl1	up
Lca5l	up
Lcp2	down
Ldhb	down
Ldhc	up
Lemd1	up
Lgi1	up
Lhb	up
Lilrb4a	down
Lilrb4a	down
Limk2	up
Lin7a	up
Lingo1	up
Lipe	up
Lmcd1	down
Lmnb2	up
Lmntd2	up
Lor	down
Lox	down
Lpin1	up
Lrp2bp	up
Lrp8	up
Lrrc10b	up
Lrrc23	up
Lrrc27	up
Lrrc29	up
Lrrc34	up
Lrrc37a	up
Lrrc43	up
Lrrc46	up
Lrrc49	up
Lrrc52	up
Lrrc6	up
Lrrc72	up
Lrrc73	up
Lrrc75aos2	up
Lrrc9	up
Lrrcc1	up
Lrriq4	up
Lrwd1	up
Lsp1	down
Luzp1	up
Ly6g6c	up
Lypd4	up
Lypd8	down
Lyz1	down
Lyz2	down
Lyzl1	up
Lyzl4	up
Lyzl4os	up
Lyzl6	up
Maats1	up
Mael	up
Mageb5	up
Magix	down
Mak	up
Map2k7	up
Map4	up
Map7d3	up
Mapk8ip1	up
Mapk8ip2	up
Mark1-ps1	up
Mas1	up
Mat1a	down
Mcee	down
Mcemp1	down
Mdh1b	up
Mdm1	up
Mdm4-ps	up
Mea1	up
Mefv	down
Meikin	up
Meltf	up
Mesp1	up
Mfn2	up
Mfsd12	up
Mfsd13b	up
Mgat4d	up
Mgl2	down
Mllt1	up
Mmel1	up
Mmp24	up
Mocs1	down
Mocs3	up
Mok	up
Morc2b	up
Mospd4	up
Mprip	up
Mpv17l	down
Mrc1	down
Mrm3	up
Mroh2b	up
Mroh4	up
Mroh5	up
Mroh7	up
Mroh8	up
Mroh9	up
Mrpl47	up
Ms4a14	up
Mtbp	up
Mtdh	up
Mtf1	up
mt-Rnr1	down
Muc16	up
Muc19	up
Muc2	up
Muc3a	up
Muc4	up
Mum1	up
Myadm	down
Mybl2	up
Mycbpap	up
Myh13	down
Myh15	up
Myl10	up
Myl4	up
Myo18b	up
Mypop	up
Myt1	up
Naa60	down
Ncan	up
Ncapg2	down
Ncbp1	up
Nck1	down
Ncr1	down
Ncs1	up
Ndst3	up
Ndst4	up
Ndufaf3	up
Necab3	up
Nectin3	up
Nedd4	down
Nek10	up
Nek11	up
Nemp2	up
Nfam1	down
Nfil3	down
Ngfr	up
Ngly1	up
Nipsnap3a	up
Nkapl	up
Nkx2-6	up
Nkx6-2	up
Nlrp14	up
Nlrp3	down
Nme5	up
Nme8	up
Nox4	down
Noxo1	up
Npas4	up
Nphp1	up
Nptxr	up
Nr4a2	down
Nrd1	up
Nrm	up
Nsg1	up
Nsun7	up
Nt5c1b	up
Ntrk3	up
Nudt18	up
Nuggc	up
Nup153	up
Nup188	up
Nup98	up
Nupl2	up
Nupr1	down
Nutm1	up
Odf2	up
Odf3	up
Odf4	up
Olfr19	up
Olfr325	up
Olfr701	up
Olr1	down
Orc1	up
Osbp2	up
Oscp1	up
Otud7a	up
Ovol2	up
Oxgr1	up
Pabpc2	up
Pacrg	up
Pacs1	up
Padi4	down
Pafah1b1	up
Panct2	down
Pantr2	up
Papolb	up
Paqr8	up
Parpbp	up
Pask	up
Patl2	down
Pawr	down
Pax3	up
Pbx4	up
Pcdh9	up
Pcdha11	up
Pcdhga12	up
Pcdhgc3	down
Pcdhgc4	up
Pcdhgc5	up
Pcnx	up
Pcnx2	up
Pcolce	up
Pcsk4	up
Pcsk6	up
Pdcl2	up
Pde1a	up
Pde1c	up
Pde4a	up
Pde6a	down
Pde7b	up
Pde9a	up
Pdha2	up
Pdilt	up
Pdzph1	up
Pebp4	up
Pex26	down
Pfkfb4	up
Pfkm	up
Pgp	up
Pgr15l	up
Phactr3	up
Phf7	up
Phkg2	up
Phlpp1	up
Phyhipl	up
Pias1	up
Pifo	up
Pigo	up
Pilrb2	down
Pin1rt1	up
Pip5k1bos	up
Pipox	up
Pkdrej	up
Pkhd1l1	up
Pknox2	up
Pkp1	up
Pla2g10	up
Pla2g3	up
Pla2g4d	up
Plac1	up
Plac8l1	up
Plcd4	up
Pldi	up
Plec	up
Plek	down
Plin2	up
Plk1	up
Plpp1	up
Plxdc1	up
Plxna2	up
Pmfbp1	up
Pnma1	up
Pnmal2	up
Poll	up
Pom121l12	up
Pom121l2	up
Pomgnt1	up
Pomt1	up
Pomt2	up
Pou2f3	up
Pp2d1	up
Ppil6	up
Ppm1d	up
Ppp1r18os	up
Ppp1r2-ps1	up
Ppp1r2-ps6	up
Ppp1r2-ps9	up
Ppp1r32	up
Ppp3cc	up
Ppp3r2	up
Ppp4r3c-ps	up
Ppp4r4	up
Praf2	down
Prame	up
Pramel3	up
Prdm8	up
Prdx6b	up
Prelid2	down
Prf1	down
Prg4	down
Prkg1	up
Prm2	up
Prps1l1	up
Prr19	up
Prr22	up
Prr27	up
Prr32	up
Prss21	up
Prss39	up
Prss40	up
Prss46	up
Prss54	up
Psd	up
Psen1	up
Psmc3ip	up
Psph	down
Ptdss2	up
Pter	down
Ptpdc1	up
Ptpru	up
Pwwp2b	up
Pygm	up
Pyurf	down
Qrich2	up
R3hcc1	up
R74862	up
Rab11fip5	up
Rab32	down
Rab3il1	up
Radil	up
Ralgds	up
Ranbp17	up
Rarres1	down
Rasl2-9	up
Rassf9	up
Rbakdn	up
Rbm12	down
Rbmxl2	up
Rbp1	down
Rd3	up
Rdh11	up
Rec8	up
Reep2	up
Reep4	up
Retnlg	down
Rftn2	up
Rfx1	up
Rfx3	up
Rfx4	up
Rfx8	up
Rgs12	up
Rhcg	up
Rhobtb2	up
Rhov	up
Rhox11	up
Rhpn1	up
Ribc1	up
Ribc2	up
Rimbp3	up
Rin1	up
Rmdn2	up
RMST_1	up
Rnf125	up
Rnf126	up
Rnf138rt1	up
Rnf151	up
Rnf17	up
Rnft2	up
Ropn1l	up
Rpain	up
Rpl10l	up
Rpl14-ps1	down
Rpl39l	up
Rpl3-ps2	down
Rps6ka6	up
Rrad	down
Rrp12	up
Rsbn1	up
Rsph6a	up
Rsph9	up
Rtn2	up
Rundc3a	up
Runx1	down
Ruvbl2	up
Rwdd2a	up
S100a9	down
Samd15	up
Samsn1	down
Samt1	up
Samt2	up
Sap25	up
Sars2	up
Sass6	up
Saxo2	up
Saysd1	up
Scamp2	up
Sccpdh	up
Scin	down
Scn2a	up
Scp2d1	up
Scube2	up
Scube3	up
Sec24b	up
Sel1l2	up
Sele	up
Selenow	up
Serp2	up
Serpina5	down
Serpinb10	down
[truncated: 361 more rows]

## Sheet: Cilia-related genes in mice
Gene symbol
Cfap410
Adcy3
Adgrv1
Ahi1
Ak7
Alms1
Arl13b
Arl3
Arl6
Asap1
B9d1
B9d2
Bbs1
Bbs10
Bbs12
Bbs2
Bbs4
Bbs5
Bbs7
Bbs9
BC027072
C2cd3
Cby1
Cc2d2a
Ccdc103
Ccdc114
Ccdc28b
Ccdc39
Ccdc40
Cep131
Cep164
Cep250
Cep290
Cep41
Cep83
Cep89
Cluap1
Crocc
Disc1
Dnaaf1
Dnaaf2
Dnaaf3
Dnah1
Dnah10
Dnah11
Dnah2
Dnah5
Dnaic1
Dnaic2
Dnali1
Dpcd
Drc1
Drd2
Dync2h1
Dynlt1a
Dynlt1b
Dynlt1c
Dynlt1f
Dyx1c1
Efhc1
Evc
Evc2
Fam161a
Fbf1
Flna
Fopnl
Foxj1
Fuz
Gas8
Gli1
Gli2
Gli3
Gpr161
Hap1
Hspb11
Htr6
Hydin
Ift122
Ift140
Ift172
Ift20
Ift22
Ift27
Ift43
Ift46
Ift52
Ift57
Ift74
Ift80
Ift81
Ift88
Inpp5e
Intu
Invs
Iqcb1
Kif17
Kif19a
Kif24
Kif27
Kif3a
Kif3b
Kif7
Lca5
Lrrc6
Mak
Mchr1
Mkks
Mks1
Mns1
Myo15
Myo7a
Nek1
Nek8
Nme5
Nme7
Noto
Nphp1
Nphp3
Nphp4
Ocrl
Odf2
Ofd1
Pacrg
Pafah1b1
Pcdh15
Pcm1
Pdzd7
Pkd1
Pkd1l1
Pkd2
Pkhd1
Poc1a
Ptch1
Ptpdc1
Rab17
Rab23
Rab8a
Rfx3
Rilpl1
Rilpl2
Ropn1l
Rp1
Rp2h
Rpgr
Rpgrip1
Rpgrip1l
Rsph1
Rsph4a
Rsph9
Rttn
Sclt1
Sept2
Sept7
Smo
Snx10
Spa17
Spag16
Spag17
Spag6
Spef2
Ssna1
Stk36
Stoml3
Sufu
Tbc1d30
Tbc1d7
Tctn1
Tctn3
Tekt2
Tekt4
Tmem138
Tmem216
Tmem231
Tmem237
Tmem67
Topors
Traf3ip1
Ttc21b
Ttc26
Ttc30a1
Ttc30a2
Ttc30b
Ttc8
Ttll3
Ttll6
Ttll9
Tulp1
Tulp3
Ulk4
Ush1c
Ush2a
Wdpcp
Wdr19
Wdr35
Wdr60
Whrn
2700049A03Rik
4931429I11Rik
Ablim1
Ablim3
Actl7a
Actr2
Actr3
Adcy5
Adcy6
Adrbk2
Ak1
Ak2
Akap14
Akap3
Akap4
Akap9
Akt1
Aldoa
Aldoart1
Als2cr12
Ambra1
Ankmy2
Anks6
Ano2
Anxa1
Apoa1bp
App
Arfgef2
Arl2bp
Armc4
Arr3
Atg14
Atg16l1
Atg3
Atg5
Atg7
Atp2b2
Atp2b4
Atp6v1d
Atp8b1
Avil
Bbip1
BC100451
Best2
Cabs1
Cabyr
Cacna1f
Calcr
Cask
Catsper1
Catsper2
Catsper3
Catsper4
Catsperb
Catsperd
Catsperg1
Catsperg2
Cav1
Ccdc176
Ccno
Ccsap
Cd24a
Cdh23
Cdhr1
Cdk20
Ceacam1
Ceacam16
Cecr2
Celsr2
Celsr3
Cep162
Cep19
Cetn1
Cetn2
Cetn3
Cetn4
Cfap20
Cfap221
Clcf1
Clic5
Clrn1
Cltb
Cnga1
Cnga3
Cngb3
Cntf
Cntfr
Crlf1
Ctf2
Cthrc1
Ctsh
Cys1
D1Ertd622e
Dld
Dnah12
Dnah17
Dnah3
Dnah7a
Dnah8
Dnah9
Dnal4
Dock4
Drc7
Dync1h1
Dync2li1
Dzip1
Dzip1l
E2f4
Elmod3
Enkur
Eno4
Eps15
Eps8
Espn
Esr2
Ezr
Fam49b
Fat4
Fnbp1l
Fscb
Fscn2
Fsip1
Fsip2
Gabarap
Gapdhs
Gcat
Gfy
Glipr1l1
Gm3448
Gnat1
Gnat2
Gnat3
Gnb1
Gngt1
Gpi1
Gpr83
Grxcr1
Gsn
Gstm5
Guca1a
Guca1b
Hif1a
Hk1
Hnf1a
Ido1
Il6ra
Il6st
Inha
Iqub
Irs1
Jag1
Kctd10
Kif5a
Kif5b
Kif5c
Kifap3
Klc1
Klc2
Klc3
Kncn
Lama5
Ldha
Ldhc
Lhfpl5
Lifr
Loxhd1
Map1lc3b
Mapt
Mertk
Met
Mir129-2
Myo1c
Myo3a
Myo3b
Myo5a
Myoc
Myrip
Nedd1
Neurl1a
Nfib
Notch2
Npy2r
Oaz3
Odf1
Odf3
Odf4
Onecut1
Onecut2
Opn1mw
Opn1sw
Oxct2b
Parva
Pcnt
Pdc
Pde1c
Pde4c
Pfkm
Pgk2
Pgr15l
Phlpp2
Pifo
Pik3r4
Pkd2l1
Pkm
Pla2g3
Plekhb1
Pls3
Poc1b
Prkaca
Prkacb
Prkar2b
Prkca
Prom1
Prom2
Prph
Psen1
Psen2
Ptchd3
Ptgs1
Ptpn23
Ptprk
Ptprq
Pvrl2
Qrfpr
Rab10
Rab27a
Rab28
Rab3ip
Rabl2
Rapgef4
Rdx
Rfx4
Rho
Rnf38
Rom1
Ropn1
Rp1l1
Rsg1
Rsph6a
Sag
Scnn1a
Scrib
Sec24b
Sept12
Sept4
Shank2
Shank3
Slc25a31
Slc26a3
Slc26a6
Slc4a7
Slc9a3r1
Slc9c1
Slirp
Sntn
Sod1
Sord
Spag4
Spata18
Spef1
Sptbn5
Sstr3
Stard10
Strc
Tas2r108
Tbc1d32
Tbcc
Tcte3
Tctex1d4
Tctn2
Tekt3
Tmc1
Tmc2
Tmem107
Tmem17
Tpgs1
Tprn
Trove2
Trpa1
Trpv4
Tsga10
Tshr
Tsku
Tspear
Tssk1
Tssk4
Ttc17
Ttll1
Ttll10
Ttll11
Ttll4
Ttll5
Ttll7
Ttll8
Tub
Tuba3a
Tuba3b
Tubb4a
Tubg1
Twf2
Txndc2
Txndc8
Ube2b
Umod
Unc119b
Vangl2
Vezt
Vhl
Wdr11
Wdr34
Wwtr1
Zmynd10
2610301B20Rik
Ak8
Arf4
Atxn10
Ccdc37
Ccp110
Cenpj
Cep104
Cep135
Cep72
Cep97
Cldn2
Cnga2
Cnga4
Cngb1
Crb3
Ctnnb1
Dcdc2a
Dnaaf5
Dnah6
Dnal1
Dpysl2
Drd1
Drd5
Dvl1
Dyx1c1Ccpg1
Exoc3
Exoc4
Exoc5
Exoc6
Exoc6b
Glis2
Gm20695
Gm4353
Gsk3b
Hspa8
Htt
Hyls1
Jade1
Kif3c
Lztfl1
Mal
Mapre1
Mdm1
Mlf1
Nek2
Nek4
Ngfr
Nin
Ninl
Nme8
Nup214
Nup35
Nup37
Nup62
Nup93
Orc1
Pard3
Pard6a
Pde6d
Pibf1
Plk1
Pomk
Rab11a
Rab11fip3
Ran
Ranbp1
Rsph3a
Rsph3b
Sass6
Sdccag8
Shh
Snap25
Spag6l
Spata7
Stil
Stk38l
Stx3
Syne2
Tekt5
Tnpo1
Tppp2
Trappc10
Trappc3
Trappc9
Trim32
Trip11
Ttbk2
Ttc12
Ttc29
Ttk
Tuba1a
Tuba1c
Tuba4a
Tubb2a
Tubb2b
Tube1
Tubgcp2
Tubgcp3
Tubgcp4
Tubgcp6
Ush1g
Vdac3
Vdac3-ps1
Wdr78
Xpnpep3
Zfp423
Ccdc65
Rfx2
Spag1

## Sheet: DE genes in Xap5 cKO testis
Gene Symbol	Regulated
1300017J02Rik	down
1520401A03Rik	down
1700003E16Rik	down
1700006A11Rik	down
1700010B08Rik	down
1700010I14Rik	down
1700012B09Rik	down
1700016K19Rik	down
1700018B08Rik	down
1700018F24Rik	down
1700019A02Rik	down
1700020D05Rik	down
1700021F07Rik	down
1700028K03Rik	down
1700029F12Rik	down
1700029P11Rik	down
1700037C18Rik	down
1700037H04Rik	down
1700074P13Rik	down
1700080O16Rik	up
1700088E04Rik	down
1700102P08Rik	down
2700049A03Rik	down
3830403N18Rik	up
4430402I18Rik	down
4921524L21Rik	down
4921536K21Rik	down
4930426D05Rik	up
4930432K21Rik	down
4930444P10Rik	down
4930486L24Rik	up
4930503E14Rik	down
4930503L19Rik	down
4930524B15Rik	down
4930544G11Rik	down
4930558K02Rik	down
4930563M21Rik	down
4930579G24Rik	down
4930590J08Rik	down
4932438A13Rik	down
4932438A13Rik-2	down
4933407O12Rik	down
4933409G03Rik	down
4933412E24Rik	down
6820408C15Rik	down
8030474K03Rik	down
9330159F19Rik	up
9430015G10Rik	down
9530057J20Rik	down
9530077C05Rik	down
A1cf	down
A26c3	down
A430057M04Rik	up
A830018L16Rik	up
A930007A09Rik	down
AA467197	down
Aaas	down
Aatk	up
Abca14	down
Abca16	down
Abca17	down
Abca2	down
Abca5	down
Abca9	up
Abcb6	down
Abcc12	down
Abcg4	up
Abhd14a	down
Abhd8	down
Abi3	up
Abitram	down
Abo	down
Acaa1b	down
Acap1	down
Acot6	up
Acot7	down
Acr	down
Acrbp	down
Acsm5	up
Acss2	down
Acss3	up
Actl7b	down
Actl9	down
Actn3	down
Acvr1	up
Acvrl1	up
Acy3	up
Acyp1	down
Adad1	down
Adad1-2	down
Adad1-4	down
Adad2	down
Adam19	up
Adam1b	down
Adam2	down
Adam3	down
Adam30	down
Adam32	down
Adam5	down
Adamts15	up
Adamts17	down
Adamtsl2	up
Adap2	up
Adcy1	down
Adcy10	down
Adgb	down
Adgre1	up
Adh1	up
Adhfe1	up
Adra2c	down
Afap1l2	up
Agbl2	down
Agbl3	down
Agbl4	down
Agbl5	down
Agt	up
Agtpbp1	down
Ahi1	down
AI429214	down
Aifm3	down
Ak7	down
Ak8	down
Ak9	down
Akap3	down
Aldh1a2	down
Aldh3a1	up
Aldh3b1	up
Alms1	down
Alx1	down
Alx3	up
Amh	up
Amigo1	down
Amotl1	up
Amotl2	up
Ang	up
Angel1	down
Angptl2	up
Ankar	down
Ankef1	down
Ankle1	down
Ankmy1	down
Ankrd31	down
Ankrd36	down
Ankrd42	down
Ankrd45	down
Ankrd60	down
Ankrd63	up
Ankrd7	down
Anks1b	down
Ano1	down
Ano4	up
Ano5	down
Ano6	up
Antxr1	up
Aox3	up
Ap1s3	down
Ap2b1-3	down
Apoe	up
Aqp2	up
Aqp5	up
Aqp9	down
Arc	down
Arfgef3	down
Arhgap15	up
Arhgap45	up
Arhgap9	up
Arhgef33	down
Arhgef37	up
Arhgef4	up
Arhgef6	up
Arl14epl	down
Arl3	down
Arl4c	up
Armc3	down
Armc4	down
Armcx6	up
Armh1	down
Armt1	down
Arsa	down
Art5	down
Ascl2	down
Asnsd1	down
Aspa	down
Aspa-2	down
Aspm	down
Asrgl1	down
Asz1	down
Atad2	down
Atad2-2	down
Atf3	up
Atf7ip2	down
Atl1	down
Atp2a3	up
Atp6v1g2-2	up
Atp7b	down
Atp8b3	down
Atp8b5	down
Atr	down
Aurkc	down
Avpr1a	up
Axdnd1	down
B3gnt4	down
B430306N03Rik	down
B430306N03Rik-2	down
B4galnt3	down
B9d1	down
Bace1	up
Bag3	up
Bahcc1	down
Baiap3	down
Bank1	down
Bard1	down
Baz1a	down
Bbof1	down
Bbs1	down
Bbs7	down
BC034090	up
BC049715	down
BC049762	down
BC051142	down
BC051142-2	down
BC051142-3	down
BC051142-4	down
BC107364	down
Bcl11a	down
Bcl11b	down
Bcl2	up
Bcl2l12	down
Bhmt	up
Bicdl1	down
Bin2	down
Birc5	down
Blvrb	up
Bmf	up
Bnc1	down
Bok	up
Boll	down
Bpi	down
Brca2	down
Brd8dc	down
Brdt	down
Brinp1	down
Brsk2	down
Bscl2	down
Bspry	down
Btbd10	down
Btbd16	down
Btc	up
Btg4	down
Bub1	down
Bub1b	down
C1qa	up
C1qb	up
C1qc	up
C1qtnf3	up
C1qtnf4	down
C1qtnf4-2	down
C1ra	up
C1s1	up
C2-3	up
C2cd4b	down
C2cd4d	up
C2cd6	down
C3ar1	up
C8b	down
C8g	down
Cabcoco1	down
Cacna1b	down
Cacna2d3	down
Cacng8	down
Cadps	up
Cage1	down
Calm2	down
Camk4	down
Camkmt	down
Caprin2-2	down
Caps2	down
Capsl	down
Car5a	down
Casc1	down
Casz1	down
Catsper2	down
Catsperb	down
Catsperd	down
Catspere1	down
Catspere2	down
Catsperg1	down
Catsperg2	down
Catsperz	down
Cbfa2t3	up
Cbln1	down
Cbr2	up
Cbr3	up
Cc2d2b	down
Ccdc103	down
Ccdc105	down
Ccdc110	down
Ccdc113	down
Ccdc116	down
Ccdc13	down
Ccdc136	down
Ccdc138	down
Ccdc144b	down
Ccdc146	down
Ccdc148	down
Ccdc150	down
Ccdc151	down
Ccdc158	down
Ccdc163	down
Ccdc172	down
Ccdc173	down
Ccdc175	down
Ccdc18	down
Ccdc180	down
Ccdc181	down
Ccdc189	down
Ccdc191	down
Ccdc192	down
Ccdc24	down
Ccdc38	down
Ccdc39	down
Ccdc40	down
Ccdc42	down
Ccdc60	down
Ccdc62	down
Ccdc65	down
Ccdc68	up
Ccdc73	down
Ccdc74a	down
Ccdc83	down
Ccdc87	down
Ccdc88c	down
Ccdc89	down
Ccdc92	down
Ccdc96	down
Cchcr1	down
Cchcr1-2	down
Cchcr1-3	down
Cchcr1-4	down
Ccl27a	down
Ccna1	down
Ccnb1ip1	down
Ccnb2	down
Ccnb3	up
Ccnb3-2	up
Ccnd1	down
Ccne2	down
Ccnk	down
Ccnyl1	down
Ccp110	down
Ccpg1os	down
Cct6b	down
Cd24a	up
Cd274	down
Cd300a	up
Cd320-3	down
Cd320-4	down
Cd33	up
Cd55b	down
Cd59a	up
Cd59b	up
Cd68	up
Cd74	up
Cd83	up
Cd84	up
Cd86	up
Cdc20b	down
Cdc42ep2	up
Cdc42ep3	down
Cdc45-2	down
Cdca3	down
Cdca7l	down
Cdca8	down
Cdh13	up
Cdh19	up
Cdh20	down
Cdh24	down
Cdhr4	down
Cdkl1	down
Cdkl2	down
Cdkl3	down
Cdkl4	down
Cdkn2a	down
Cdkn2c	down
Cdkn3	down
Cdr2	down
Cds1	down
Ceacam20	down
Cebpa	up
Cebpd	up
Cebpg	down
Cecr2-2	down
Cela2a	down
Celf5	down
Celsr2	down
Celsr3	down
Celsr3-2	down
Cenpf	down
Cenph	down
Cenpn	down
Cenpq	down
Cenps	down
Cenpu	down
Cep126	down
Cep128	down
Cep131	down
Cep162	down
Cep290	down
Cep43	down
Cep55	down
Cep63	down
Cep72	down
Cep76	down
Cep83	down
Cers3	down
Ces1d	up
Cetn1	down
Cetn4	down
Cfap161	down
Cfap206	down
Cfap20dc	down
Cfap298	down
Cfap299	down
Cfap300	down
Cfap36	down
Cfap43	down
Cfap44	down
Cfap45	down
Cfap46	down
Cfap47	up
Cfap52	down
Cfap53	down
Cfap54	down
Cfap57	down
Cfap61	down
Cfap65	down
Cfap69	down
Cfap70	down
Cfap74	down
Cfap97	down
Cfap99	down
Cftr	down
Chaf1a	down
Chchd6	down
Chd1l	down
Chd5	down
Chdh	up
Chga	down
Chgb	down
Chrna5	down
Chst1	down
Chst15	up
Chtf18	down
Cip2a	down
Cit	down
CK137956	down
Ckap2	down
Ckap2l	down
Cklf	down
Clca3a1	up
Cldn34b1	up
Cldn7	up
Cldn7-2	up
Clec2m	down
Clec3b	up
Clec4n	up
Clgn	down
Clhc1	down
Clic5	up
Clspn	down
Clstn3	down
Cmtm2a	down
Cmtm2b	down
CN725425	down
Cnksr2	down
Cnrip1	up
Cntd1	down
Cog6	down
Coil-2	down
Col23a1	up
Col26a1	up
Col2a1	down
Col6a6	up
Col9a3	up
Comp	down
Coprs	down
Cops7a	down
Corin	up
Coro1b	up
Cox6b2	down
Cox7b2	down
Cox8c	down
Cpeb2	down
Cplane1	down
Cpn1	down
Cpne5	down
Cpne5-2	down
Cpne7	down
Cpt1b	down
Cpt1c	down
Crabp1	down
Cracd	down
Crat	down
Creb3l4	down
Creb5	up
Creg2	down
Crem	down
Crisp2	down
Crocc2	up
Crtac1	down
Crtam	down
Cry1	down
Crybg3	down
Csf1r	up
Csf2rb	up
Csl	down
Csnk2b	down
Cspg5	down
Ctcfl	down
Ctf1	down
Ctnnd2	down
Ctsc	up
Ctss	up
Cx3cr1	up
Cxcl1	up
Cxcl12	up
Cxcl16	up
Cxcl16-2	up
Cxxc5	up
Cyct	down
Cyp19a1	down
Cyp1b1	up
Cyp27a1	up
Cyp2j6	up
Cyp2r1	down
Cyp2u1	down
Cyp4f14	up
Cyp4f17	up
Cyp4v3	up
Cys1	up
D130043K22Rik	down
D1Pas1	down
D430019H16Rik	up
Dab1	down
Dab2	up
Daw1	down
Dbil5	down
Dcaf6	down
Dcdc2a	down
Dck	down
Dcn	up
Dcp1b	down
Ddias	down
Ddit4l	up
Ddr1-2	up
Ddt	down
Ddx1	down
Ddx10	down
Ddx20	down
Ddx25	down
Ddx39a	down
Ddx4	down
Ddx43	down
Defb15	up
Dennd5b	down
Dennd5b-2	down
Depdc1b	down
Deptor	up
Deup1	down
Dhrs3	up
Dhx16	down
Dhx58	down
Dipk1b	down
Dis3	down
Dis3l	down
Disp3	down
Dkkl1	down
Dlat	down
Dlec1	down
Dlg2	up
Dlgap1	up
Dlgap5	down
Dll3	down
Dmc1	down
Dmrta2	up
Dmrtb1	down
Dmrtc2	down
Dmxl2	down
Dnaaf1	down
Dnaaf3	down
Dnaaf4	down
Dnaaf6	down
Dnah1	down
Dnah10	down
Dnah12	down
Dnah12-2	down
Dnah14	down
Dnah17	down
Dnah2	down
Dnah6	down
Dnah7a	down
Dnah7b	down
Dnah7c	down
Dnah8	down
Dnaic1	down
Dnajb13	down
Dnajb3	down
Dnajc12	up
Dnajc2	down
Dnajc5g	down
Dnali1	down
Dnhd1	down
Dnpep	down
Dnph1	down
Doc2a	down
Dock10	up
Donson	down
Dpep3	down
Dpy19l2	down
Dpyd	up
Drc1	down
Drc3	down
Drc7	down
Dscc1	down
Dsn1	down
Dtl	down
Dtwd1	down
Dusp14	down
Dusp18	down
Dusp4	up
Dxo-2	down
Dync2h1	down
Dynlrb2	down
Dzank1	down
Dzip1	down
E2f8	down
E430018J23Rik	up
Eaf2	down
Ebf3	down
Ebf4	down
Echdc1	down
Ect2	down
Eda2r	up
Edc4	down
Edn1	up
Efcab3	down
Efcab5	down
Efcab6	down
Efcab7-2	down
Efcab8	down
Efhb	down
Efhc1	down
Efna3	down
Egfr	up
Egr3	up
Eid3	down
Elapor1	down
Elapor2	down
Elavl2	down
Elavl4	down
Elfn1	up
Elfn2	down
Elmo3	down
Elovl3	up
Eme1	down
Emilin3	down
Eml6	down
Enkd1	down
Enkur	down
Eno3	down
Eno3-2	down
Eno4	down
Enpep	up
Enthd1	down
Entpd4	down
Epb41l1	up
Epb41l4a	down
Epha10	down
Epha2	up
Epha6	down
Ephx1	up
Ephx2	up
Eppk1	down
Eps8l3	down
Epyc	up
Erbb4	up
Erich2	down
Ermap	up
Esco2	down
Espl1	down
Esr2	up
Exd1	down
Exosc10-2	down
Eya4	down
F13a1	up
F3	up
Faah	down
Fabp3-2	up
Fabp9	down
Fads6	up
Fah	up
Fam107b	down
Fam110c	down
Fam114a1	up
Fam118a	down
Fam149a	up
Fam170a	down
Fam174b	down
Fam178b	down
Fam181a	down
Fam184a	down
Fam184b	up
Fam186b	down
Fam189a2	up
Fam205a2	down
Fam205a3	down
Fam205a4	down
Fam217a	down
Fam221a	down
Fam222a	up
Fam227a	down
Fam227b	down
Fam228a	down
Fam229b	down
Fam234b	down
XAP5L	down
Fam89a	up
Fam90a1b	down
Fam98c	down
Fancd2	down
Fancg	down
Fanci	down
Fank1	down
Fbf1	down
Fbp1	down
Fbxl16	down
Fbxl2	down
Fbxo15	down
Fbxo40	down
Fbxo43	down
Fbxo47	down
Fbxo48	down
Fbxw10	down
Fcgr2b	up
Fcgrt	up
Fcho1	down
Fcrls	up
Fermt3	up
Fes	up
Fgf2	up
Fgfr2	up
Fgfr3	down
Fgr	down
Fhad1	down
Fhl4	down
Fhod3	up
Fibcd1	down
Fignl1	down
Flacc1	down
Fmo1	up
Fmo2	up
Fmo4	up
Fndc5	up
Fndc5-2	up
Fos	up
Foxc1	up
Foxd2	up
Foxh1	down
Foxm1	down
Foxn4	down
Foxp2	up
Foxj1	down
Foxq1	up
Fras1	down
Frg1-2	down
Frmpd3	down
Frs3	down
Fsd1	down
Fsd1l	down
Fsip1	down
Fsip2	down
Fxyd1	up
Fzd1	up
G0s2	up
Gal3st1	down
Galnt12	down
Galnt3	down
Galnt6	down
Gata3	up
Gcat	down
Gdnf	up
Gdpd1	down
Gdpd1-2	down
Gdpd4	down
Gem	up
Gen1	down
Gfap	down
Gfra4	down
Gfy	down
Ggact	down
Ggnbp1	down
Gins1	down
Gins2	down
Gipc3	up
Gk2	down
Glb1l	down
Glipr1l2	down
Glis1	down
Glyctk	down
Gm10044	down
Gm10439	down
Gm10634	down
Gm1096	down
Gm11545	down
Gm11639	down
Gm11837	down
Gm11992	down
Gm128	down
Gm15262	down
Gm15881	down
Gm17359	down
Gm21188	up
Gm2396	down
Gm272	down
Gm2832	down
Gm3417	down
Gm34298	down
Gm3448	down
Gm35339	down
Gm35588	down
Gm36864	down
Gm38499	down
Gm40881	down
Gm44	down
Gm4871	down
Gm4922	down
Gm5071	up
Gm5072	up
Gm5134	down
Gm5136	down
Gm5174	down
Gm52481	down
Gm5617	down
Gm5930	down
Gm5934	up
Gm648	down
Gm6713	down
Gm6729	down
Gm6871	down
Gm7827	down
Gm7972	down
Gm8126	down
Gm884	down
Gm8914	up
Gm9	up
Gm960	down
Gm973	down
Gm9805	down
Gmcl1	down
Gml	down
Gml2	down
Gmnn	down
Gnao1	down
Got1l1	down
Gpat2	down
Gpc2	down
Gper1	up
Gpr146	up
Gpr160	down
Gpr19	down
Gpr20	up
Gpr88	up
Gps2	down
Gpx8	up
Gramd1c	down
Gramd2	down
Grem2	up
Grhl1	down
Gria4	down
Grik3	down
Grik5	down
Grin2d	down
Grk4	down
Grm7	up
Grtp1	down
Gsn	up
Gstm5	down
Gsto2	down
Gstt1	up
Gstt2	down
Gtf2a1l	down
Gtse1	down
Gtsf1	down
Gykl1	down
H1f10	down
H1f2	up
H2bc4	up
H2bfm	up
H2-Q10-4	up
H6pd-2	up
Hao2	up
Hap1	down
Hapln2	up
Haspin	down
Haspin-2	down
Haus1	down
Haus4	down
Haus6	down
Hcn3	down
Hcn4	down
Hdac7	up
Hdgfl1	down
Heg1	up
Hells	down
Helq	down
Helt	up
Henmt1	down
Hepacam2	down
Hey1	down
Hfm1	down
Hip1r	down
Hirip3	down
Hmga1	down
Hmga1-2	down
Hmga1b	down
Hmgcll1	down
Hmx1	down
Hnmt	up
Hoatz	down
Hormad1	down
Hormad2	down
Hoxa4	down
Hoxc10	up
Hoxc9	up
Hoxd10	up
Hoxd13	up
Hoxd9	up
Hpgds	up
Hrh4	down
Hrk	up
Hrob	down
Hs3st1	up
Hs3st3b1	up
Hs6st2	down
Hsd17b1	up
Hsd17b3	down
Hsd3b1	up
Hsf2bp	down
Hsf5	down
Hsf5-2	down
Hspa2	down
Hspa4l	down
Hspa4l-2	down
Hspb1	up
Hspb8	up
Hspb9	down
Hyal6	down
Hydin	down
Hyls1	down
Ica1l	down
Id3	up
Id4	down
Ier2	up
Ift122	down
Ift140	down
Ift172	down
Ift27	down
Ift74	down
Ift80	down
Ift81	down
Ift88	down
Iftap	down
Igbp1b	down
Igfbp3	up
Igfbp4	up
Igfbp7	up
Iglon5	down
Iho1	down
Il10rb	up
Il17rb	up
Il4i1b	down
Il4ra	up
Il9r	down
Immp2l	down
Inava	down
Inca1	down
Inhba	up
Insc	up
Insl6	down
Ints13	down
Ints13-2	down
Ints7	down
Iqank1	down
Iqcb1	down
Iqcd	down
Iqcg	down
Iqch	down
Iqck	down
Iqub	down
Irak1bp1	down
Irak3	down
Irf8	up
Irgc1	up
Irs4	down
Irx5	down
Itga11	up
Itgam	up
Itgb3bp	down
Itih5l-ps	down
Itpr2	up
Itpr2-2	up
Jag2	down
Jdp2	up
Jhy	down
Jph1	down
Jsrp1	up
Jun	up
Kalrn	up
Kash5	down
Katnal2	down
Katnb1	down
Kazald1	up
Kbtbd6	down
Kbtbd8	down
Kcna6	up
Kcng2	up
Kcnj4	down
Kcnj9	down
Kcnk1	up
Kcnk10	down
Kcnk3	up
Kctd19	down
Kctd7	down
Kdm4d	down
Khdrbs3	down
Kif11	down
Kif11-2	down
Kif14	down
Kif15	down
Kif17	down
Kif18a	down
Kif18b	down
Kif20a	down
Kif20b	down
Kif24	down
Kif27	down
Kif2c	down
Kif9	down
Kirrel3	up
Kitl	up
Kiz	down
Klf15	up
Klf3	up
Klhdc7a	up
Klhdc8a	up
Klhdc8b	up
Klhdc9	down
Klhl29	up
Klhl35	down
Klhl42	up
Klhl6	up
Klrg2	down
Knl1	down
Knstrn	down
Kntc1	down
Kremen2	up
Krtcap3	down
Kyat1	down
L3mbtl2	down
Lama3	up
Laptm5	up
Laptm5-2	up
Larp1b	down
Larp7	down
Lca5l	down
Lca5l-2	down
Lcn2	up
Lcorl	down
Lct	down
Ldha	down
Ldhal6b	down
Ldhc	down
Lef1	down
Lekr1	down
Letm2	down
Lgals4	up
Lhcgr	up
Lhx8	down
Lig1	down
Limd2	down
Lin28a	down
Lin28b	down
Lin7a	down
Lingo1	down
Lingo2	up
Lmcd1	up
Lmntd2	down
LOC100861978	down
LOC100862043	down
LOC100862324	down
LOC102635990	down
LOC108168679	down
LOC115486439	down
LOC666331	down
Lpar1	up
Lpcat2	up
Lpcat2b	down
Lpcat4	down
Lpxn	down
Lrat	down
Lrfn3	up
Lrguk	down
Lrp2	down
Lrrc14b	up
Lrrc23	down
Lrrc27	down
Lrrc27-2	down
Lrrc29	down
Lrrc34	down
Lrrc36	down
Lrrc37a	down
Lrrc46	down
Lrrc51	down
Lrrc56	down
Lrrc6	down
Lrrc61	down
Lrrc63	down
Lrrc71	down
Lrrc73	down
Lrrc9	down
Lrrcc1	down
Lrriq1	down
Lrriq3	down
Lrwd1	down
Lsamp	up
Lsm2-2	down
Lsm4-2	down
Ltbp3	up
Lum	up
Ly6k	down
Lyar	down
Lypd10	down
Lypd11	down
Lypd4	down
Lypd9	down
Lyrm7	down
Lyz2	up
M1ap-2	down
Maats1	down
Macrod2	down
Mad2l2	down
Mad2l2-2	down
Madd	down
Mael	down
Maf	up
Maff	up
Mag	down
Magea10	up
Magea2	up
Mageb17-ps	up
Mageb18	up
Mageb3	down
Majin	down
Majin-2	down
Mak	down
Mamdc2	up
Mamld1	up
Maob	up
Map11	down
Map3k9	down
Map7d2	down
Mapk10	down
Mapk13	up
Mapk15	down
Mapk8ip2	down
Marchf10	down
Marchf11	down
Masp1	up
Mastl	down
Mbnl3	down
Mboat4	up
Mcm10	down
Mcm5	down
Mcm8	down
Mcmdc2	down
Mdc1	down
Mdc1-2	down
Mdc1-3	down
Mdfi	up
Mdfic	up
Mdga1	down
Mdh1b	down
Mdn1	down
Mea1	down
Meaf6	down
Mei1	down
Mei4	down
Meig1	down
Meikin	down
Meiob	down
Meioc	down
Melk	down
Mesp2	down
Mettl22	down
Mfsd13b	down
Mfsd6l	down
Mgarp	up
Mgat3	up
Mgat4d	down
Mgat5b	down
Mgll	down
Micu3	down
Mindy4	down
Mis18a	down
Mis18bp1	down
Mlc1	down
Mlf1	down
Mllt10	down
Mmel1	down
Mmp11	up
Mmp19	up
Mmp23	up
Mmp28	up
Mok	down
Morc1	down
Morc2b	down
Morc4	down
Morn2	down
Morn5	down
Mphosph8	down
Mpp7	down
Mpped1	down
Mpped2	down
Mrap	up
Mras	up
Mreg	down
Mroh1	down
Mroh2a	down
Mroh2b	down
Mroh4	down
Mroh8	down
Mrvi1	up
Ms4a10	up
Ms4a13	down
Ms4a20	down
Ms4a4a	up
Ms4a6b	up
Ms4a7	up
Msh4	down
Msh5	down
Msh5-2	down
Msh5-3	down
Msl3	up
Mslnl	down
Mtbp	down
Mtmr6	down
Muc1	down
Muc3	down
Mycbpap	down
Mylk3	up
Myo19	down
Myo1a	down
Myorg	down
Myoz2	up
Myrf	down
Myt1l	down
Naa11	down
Naaladl1	down
Naip5	up
Nanos1	down
Nap1l1	down
Nasp	down
Nat8l	down
Nav3	up
Nbl1	up
Ncapd2	down
Ncapg	down
Ncapg2	down
Ncf1	up
Nckap1l	up
Ncmap	up
Ndc80	down
Ndrg2	up
Ndrg4	down
Ndst4	down
Ndufaf3	down
Necab1	up
Nectin3	down
Nedd9	up
Nefm	up
Nek1	down
Nek11	down
Nek2	down
Nek2-2	down
Nek4	down
Nelfcd	down
Nelfe-3	down
Nell2	down
Neurl4-2	down
Nfam1	up
Nfasc	down
Nfatc1	up
Nfil3	up
Nfkb1	up
Nhej1	down
Nin	up
Nkain1	down
Nkain1-2	down
Nkain2	up
Nkapl	down
Nkx1-1	down
Nkx6-2	down
Nlrp14	down
Nmbr	down
Nme5	down
Nme6	down
Noc4l	down
Nod1	up
Nol4	down
Nol8	down
Nova1	down
Noxo1	down
Npas4	up
Npffr1	down
Nphp1	down
Nphp4	down
Npr2	up
Nprl2	down
Nps	down
Nqo1	up
Nr0b2	up
Nr6a1	down
Nrarp	down
Nrn1	up
Nsl1	down
Nsun7	down
Nt5dc2	down
Nt5el	down
Ntn4	up
Ntng2	up
Ntrk3	down
Nudt17	down
Nuf2	down
Nup133	down
Nup205	down
Nup210	down
Nup210l	down
Nup88-2	down
Nupr1	up
Nupr1l	up
Nutm1	down
Nwd1	up
Nxn	down
Nxt1	down
Nxt2	up
Nyx	up
Oard1	down
Obscn	down
Oca2	up
Odf2	down
Odf2l	down
Odf4	down
Oip5	down
Oit1	down
Olfr316	down
Olig1	up
Osbp2	down
Oscp1	down
Osgin1	up
Osmr	up
Osr1	up
Osr2	up
Otud6a	up
Otud7a	down
Ovgp1	down
Ovol1	down
Ovol2	down
Oxgr1	down
P2rx3	down
P2ry12	up
P2ry6	up
P3h2	up
Pabpc1	down
Pabpc1l2a	up
Pabpc2	down
Pabpc6	down
Pacrg	down
Pak6	up
Papolb	down
Papss2	up
Paqr6	up
Parp12	down
Parpbp	down
Pask	down
Patl2	down
Pbk	down
Pbp2	down
Pbx4	down
Pcbp3	down
Pcdh7	up
Pcdhb17	up
Pcdhga8	up
Pcdhgb2	up
Pcdhgb4	up
Pcdhgb5	up
Pcgf5	down
Pcgf6	down
Pclo	down
Pcnx3-2	down
Pcnx4	down
Pcsk4	down
Pdcl2	down
Pde1c	down
Pde3b	down
Pde4d	up
Pde4dip	down
Pde8a	down
Pdgfc	up
Pdgfra	up
Pdgfrl	up
Pdha2	down
Pdk4	up
Pdlim2	up
Pdlim4	up
Pdxp	down
Pdzd9	down
Pebp4	down
Penk	up
Perm1	down
Perp	down
Pex11g	down
Pex14-2	down
Pf4	up
Pf4-2	up
Pfn4	down
Pgam2	down
Pgbd1	down
Pgghg	up
Pgk2	down
Pgm2l1	down
Phc1	down
Phf1	down
Phf7	down
Phkg2	down
Phyhipl	down
Pick1	down
Pidd1	down
Pifo	down
Pigp-2	down
Pih1d2	down
Pik3cg	up
Piwil1	down
Piwil2	down
Pkd1l2	down
Pkd2l2	down
Pkmyt1	down
Pla2g2c	down
Plaat5	down
Plac9a	up
Plcd4	down
Plch2	down
Pld4	up
Pld6	down
Plekha5	down
Plekhd1	down
Plekhg4	down
Plekhh3	up
Plekhn1	down
Plk4	down
Plk5	down
Plpp3	up
Plxdc2	up
Plxna4	up
Pm20d1	up
Pmaip1	up
Pmp2	down
Pnma1	down
Pnmal1	down
Pnpla7	down
Poc1a	down
Pola2	down
Polb	down
Pold1	down
Poln	down
Polq	down
Pom121l12	down
Pom121l2	down
Pomt1	down
Pon3	up
Poteg	down
Potegl	down
Pou2f2	down
Pou4f1	down
Pou6f1	down
Ppargc1a	up
Ppic	up
Ppih	down
Ppil4	down
Ppil6	down
Ppp1r13l	down
Ppp1r14bl	down
Ppp1r32	down
Ppp1r36	down
Ppp1r42	down
Ppp2r3c	down
Ppp3cc	down
Ppp3r2	down
Ppp4r4	down
Prame	up
Pramel13	down
Prc1	down
Prdm9	down
Prdx6b	down
Prickle4	down
Prim2	down
Prkag2	down
Prnd	down
Procr	up
Prok2	down
Prps1l1	down
Prr15	up
Prr19	down
Prr7	down
Prss38	down
Prss41	down
Prss42	down
Prss43	down
Prss44	down
Prss45	down
Prss50	down
Prtg	down
Prune2	up
Prxl2b	up
Psip1	down
Psma8	down
Psmc3ip	down
Psmd10-2	up
Pspc1	down
Ptbp2	down
Ptchd3	down
Ptgds	down
Ptges	up
Pth2	down
Ptk2b	up
Ptn	up
Ptpdc1	down
Ptpn20	down
Ptprd	up
Ptprq	down
Ptprr	up
Ptprs	down
Ptprt	down
Pudp	down
Pwwp2b	up
Pwwp2b-2	up
Pwwp3a	down
Pxt1	down
Pxt1-2	down
Pygm	up
Pygm-2	up
Pyroxd2	up
Qpct	up
Qrich2	down
Rab27b	up
Rab39	down
Rad18	down
Rad51	down
Rad51ap1	down
Rad51b	down
Rad51c	down
Rad51c-2	down
Rad54b	down
Rad54l	down
Rad9b	down
Radil	down
Radx	down
Ralgds	down
Ramp1	up
Ranbp17	down
Rangrf	down
Rapgefl1	down
Rarres2	up
Rasal1	up
Rassf10	down
Rassf7	down
Rassf8	up
Rb1cc1	down
Rbl1	down
Rbm11	down
Rbm44	down
Rbm46	down
Rbm47	up
Rbmxl2	down
Rbp4	down
Rcan2	up
Rcor2	down
Reln	down
Retsat	up
Rfc4	down
Rfx2	down
Rfx4	down
Rfx8	down
Rgs11	up
Rgs12	down
Rgs9	down
Rhbdl3	up
Rhd	down
Rhebl1	up
Rhox2b	up
Rhox2c	up
Rhpn1	down
Ribc2	down
Riiad1	down
Rimbp3	down
Rimklb	down
Rims1-2	down
Rims2	down
Rims3	down
Rmi2	down
Rnase4	up
Rnd3	up
Rnf112	down
Rnf157	down
Rnf17	down
Rnf182	down
Rnf212	down
Rnf212b	down
Rnf222	up
Rnf32	down
Robo2	up
Ropn1l	down
Ror1	up
Rp1	down
Rpgrip1	down
Rpl39l	down
Rpl3l	down
Rpp25	up
Rps18-2	up
Rps27a	up
Rps6ka6-2	down
Rpusd3	down
Rrm2	down
Rskr	down
Rsph1	down
Rsph3a	down
Rsph3b	down
Rsph9	down
Rspo4	down
Rtn1	down
Rtn4rl1	up
Runx1	up
Runx3	down
Runx3-2	down
Rxfp2	down
Ryr1	down
S100a1	up
S1pr1	up
Sall4	down
Samd15	down
Samd4	up
Samd7	down
Sap30	down
Sarm1	down
Sass6	down
Satb2	down
Saxo2	down
Scaper	down
Scara3	up
Sccpdh	down
Sclt1	down
Scml1	up
Scml4	down
Scn1a	up
Scn2b	up
Scn3a	up
Scn5a	down
Scn7a	up
Scube2	down
Scube3	down
Scube3-2	down
Scx	up
Sdf2l1	down
Sdr39u1	down
Sds	up
Sec1	down
Sec16b	up
Sel1l2	down
Sel1l3	up
Selenbp1	up
Selenop	up
Sema4f	down
Senp2	down
Sephs2	down
Septin12	down
Septin3	down
Serf1	down
Serf1-2	down
Serpina3a	up
Serpina3c	up
Serpina3g	up
Serpinb1a	up
Serpinb6b	up
Serpinb9	up
Setdb2	down
Sfmbt1	down
Sfmbt2	down
Sgca	down
Sgo2a	down
Sgpp2	down
Sh3rf3	down
Shank1	down
Shank2	down
Shcbp1	down
Shcbp1l	down
Shisa3	down
Shisa6	up
Shisa7	up
Shoc1	down
Siglece	down
Ska1	down
Ska3	down
Skiv2l-3	down
Skiv2l-4	down
Slamf7	down
Slc12a5	down
Slc13a5	down
Slc16a10	down
Slc16a14	up
Slc16a7	down
Slc17a7	down
Slc18b1	up
Slc22a16	down
Slc24a2	up
Slc25a31	down
Slc25a31-2	down
Slc25a34	up
Slc26a10	up
Slc26a8	down
Slc26a8-2	down
Slc27a2	down
Slc2a2	up
Slc2a3	down
Slc2a5	down
Slc2a5-2	down
Slc30a3	down
Slc40a1	up
Slc4a8	down
Slc5a5	down
Slc66a2	up
Slc6a16	down
Slc6a21	down
Slc6a4	up
Slc6a8	up
Slc8a2	down
Slc9a5	down
Slc9a7	up
Slc9a9	up
Slc9b1	down
Slc9c1	down
Slco1a5	down
Slco6c1	down
Slco6d1	down
Slf1	down
Slitrk5	up
Smad3	up
Smad6	up
Smad7	up
Smc1b	down
Smc4	down
Smco2	down
Smg9	down
Smim24	down
Smpd3	down
Smpd5	down
Snai3	down
Sntb1	up
Snx20	up
Socs3	up
Sohlh1	down
Sord	down
Sox11	down
Sox30	down
Sox5	up
Sox5-2	up
Spa17	down
Spaar	up
Spag16	down
Spag17	down
Spag17-2	down
Spag4	down
Spag5	down
Spag6l	down
Spag8	down
Sparcl1	up
Spata1	down
Spata16	down
Spata17	down
Spata18	down
Spata22	down
Spata22-2	down
Spata24	down
Spata31d1a	down
Spata33	down
Spata4	down
Spata6	down
Spats1	down
Spats2	down
Spc24	down
Spdl1	down
Spdya	down
Spdye4a	down
Spdye4b	down
Spef1l	down
Spef2	down
Spesp1	down
Sphkap	down
Spi1	up
Spink2	down
Spo11	down
Spocd1	down
Sprtn	down
Spry4	up
Spsb1	up
Srgap1	up
Srrm4	up
Ssmem1	down
Sstr2	up
St13	down
Stab1	up
Stab2	down
Stag3	down
Stambp	down
Stard6	down
Stat6	up
Steap1	down
Stk31	down
Stk33	down
Stk36	down
Stkld1	down
Ston2	down
Stox1	down
Stpg1	down
Stpg2	down
Stpg4	down
Stra6	down
Stra8	down
Strbp	down
Stxbp5l	down
Styxl1	down
Sugp2	down
Sult1a1	up
Sult6b1	down
Sun3	down
Supt16	down
Supt20	down
Susd5	down
Svop	down
Syce1	down
Syce1l	down
Syce2	down
Syce3	down
Sycp1	down
Sycp2	down
Syngap1	down
Syngr4	down
Synm	up
Syt11	down
Syt12	up
Syt17	down
Syt5	down
Tacc3	down
Taf1b	down
Taf7l2	down
Taf9	down
Tal1	up
Tas1r1	down
Tbc1d1	down
Tbc1d2	down
Tbc1d2b	up
Tbc1d30	up
Tbp	down
Tbx1	down
Tbx1-2	down
Tbx1-3	down
Tbx18	up
Tc2n	down
Tcam1	down
Tcea2	down
Tceal6	up
Tcfl5	down
Tchp	down
Tcp1	down
Tcp10a	down
Tcp10b	down
Tcp10c	down
Tcp11	down
Tcp11-2	down
Tcte1	down
Tcte2	down
Tcte3	down
Tctex1d2	down
Tdrd1	down
Tdrd12	down
Tdrd5	down
Tdrd6	down
Tdrd9	down
Tdrkh	down
Tedc1	down
Tekt1	down
Tekt2	down
Tekt3	down
Tekt5	down
Terb1	down
Terb2	down
Tesc	up
Tesmin	down
Tex101	down
Tex11	down
Tex12	down
Tex13b	down
Tex13b-2	down
Tex13d	up
Tex14	down
Tex14-2	down
Tex15	down
Tex22	down
Tex22-2	down
Tfr2	down
Tgfb2	up
Tgfbi	up
Tgfbr3	up
Tgm1	down
Them6	down
Thop1	down
Thrb	up
Thrsp	up
Ticrr	down
Timeless	down
Timm8a2	down
Tinf2	down
Tjp3	down
Tkfc	down
Tle7	down
Tll2	up
Tlr2	up
Tlr4	up
Tlr7	up
Tlr8	up
Tmbim7	down
Tmc8	up
Tmem107	down
Tmem116	down
Tmem119	up
Tmem121b	up
Tmem121b-2	up
Tmem145	down
Tmem151b	down
Tmem176a	up
Tmem176b	up
Tmem232	down
Tmem28	down
Tmem30c	down
Tmem37	up
Tmem45b	down
Tmem59l	down
Tmem63c	down
Tmem67	down
Tmem71	up
Tmem88b	up
Tmem97	down
Tmod1	up
Tmprss12	down
Tmsb10	down
Tnfaip8l2	up
Tnfrsf11b	up
Tnfrsf12a	up
Tnfrsf13b	up
Tnfrsf1b	up
Tnfsfm13	up
Tnnt1	up
Tonsl	down
Top2a	down
Topaz1	down
Topbp1	down
Tor4a	up
Tox	up
Tpgs2	down
Tprn	down
Traf1	up
Trafd1	down
Trim11	down
Trim2	up
Trim37	down
Trim37-2	down
Trim47	up
Trim56	up
Trim65	up
Trim69	down
Trmt10a	down
[truncated: 142 more rows]

## Sheet: Xap5 CUT&Tag peaks annotation
seqnames	start	end	width	strand	peakName	colorScore	fold_enrichment	X.log10.pvalue	X.log10.qvalue	relative_summit_position	annotation	geneChr	geneStart	geneEnd	geneLength	geneStrand	geneId	transcriptId	distanceToTSS
NT_187055.1	1791	1946	156	*	A_WT_peak_12	22	4.07915	5.29532	2.28939	11	Promoter (<=1kb)	34	48	1475	1428	2	Cd99	rna-NM_025584.2	-316
NT_187064.1	936	1146	211	*	A_WT_peak_13	50	3.00222	8.52376	5.00064	45	Distal Intergenic	40	4564	52729	48166	1	LOC100861749	rna-XR_001782945.3	-3418
NT_187064.1	2005	2883	879	*	A_WT_peak_14	182	4.35788	22.8367	18.2137	395	Promoter (1-2kb)	40	4564	52729	48166	1	LOC100861749	rna-XR_001782945.3	-1681
NT_187064.1	6394	6853	460	*	A_WT_peak_15	86	3.07396	12.5649	8.65104	262	Intron (rna-XR_001782945.3/gene-LOC100861749, intron 1 of 28)	40	4564	52729	48166	1	LOC100861749	rna-XR_001782945.3	1830
NT_187064.1	7024	7260	237	*	A_WT_peak_16	35	2.40522	6.86747	3.56777	61	Intron (rna-XR_001782945.3/gene-LOC100861749, intron 2 of 28)	40	4564	52729	48166	1	LOC100861749	rna-XR_001782945.3	2460
NT_187064.1	8903	9671	769	*	A_WT_peak_17	119	3.59687	16.1446	11.9585	386	Intron (rna-XR_001782945.3/gene-LOC100861749, intron 2 of 28)	40	4564	52729	48166	1	LOC100861749	rna-XR_001782945.3	4339
NT_187064.1	24652	24829	178	*	A_WT_peak_18	39	2.4941	7.30047	3.93322	166	Exon (rna-XR_001782945.3/gene-LOC100861749, exon 6 of 29)	40	13019	20242	7224	2	LOC118568478	rna-XR_004940612.1	-4410
NT_187064.1	26868	27249	382	*	A_WT_peak_19	143	3.54138	18.7196	14.3534	148	Exon (rna-XR_001782945.3/gene-LOC100861749, exon 7 of 29)	40	13019	20242	7224	2	LOC118568478	rna-XR_004940612.1	-6626
NT_187064.1	27955	28278	324	*	A_WT_peak_20	101	2.90735	14.1465	10.1057	224	Exon (rna-XR_001782945.3/gene-LOC100861749, exon 8 of 29)	40	33886	35505	1620	1	LOC100861738	gene-LOC100861738	-5608
NT_187064.1	31383	31720	338	*	A_WT_peak_21	260	3.82972	31.1405	26.0477	149	Promoter (2-3kb)	40	33886	35505	1620	1	LOC100861738	gene-LOC100861738	-2166
NT_187064.1	31941	32111	171	*	A_WT_peak_22	78	2.53752	11.6972	7.85764	45	Promoter (1-2kb)	40	33886	35505	1620	1	LOC100861738	gene-LOC100861738	-1775
NT_187064.1	32299	33235	937	*	A_WT_peak_23	131	2.97223	17.4197	13.1402	486	Promoter (<=1kb)	40	33886	35505	1620	1	LOC100861738	gene-LOC100861738	-651
NT_187064.1	33966	34596	631	*	A_WT_peak_24	66	2.44354	10.4216	6.69966	470	Exon (gene-LOC100861738/gene-LOC100861738, exon 1 of 1)	40	33886	35505	1620	1	LOC100861738	gene-LOC100861738	80
NT_187064.1	34883	35154	272	*	A_WT_peak_25	43	2.16423	7.77072	4.34126	69	Exon (gene-LOC100861738/gene-LOC100861738, exon 1 of 1)	40	33886	35505	1620	1	LOC100861738	gene-LOC100861738	997
NT_187064.1	38287	38437	151	*	A_WT_peak_26	72	2.624	10.9927	7.21774	61	Intron (rna-XR_001782945.3/gene-LOC100861749, intron 11 of 28)	40	33886	35505	1620	1	LOC100861738	gene-LOC100861738	4401
NT_187064.1	39558	39840	283	*	A_WT_peak_27	149	3.33828	19.3566	14.9471	101	Exon (rna-XR_001782945.3/gene-LOC100861749, exon 13 of 29)	40	33886	35505	1620	1	LOC100861738	gene-LOC100861738	5672
NT_187064.1	40059	40370	312	*	A_WT_peak_28	347	4.81181	40.2373	34.7024	133	Exon (rna-XR_001782945.3/gene-LOC100861749, exon 14 of 29)	40	33886	35505	1620	1	LOC100861738	gene-LOC100861738	6173
NT_187064.1	43879	44317	439	*	A_WT_peak_29	206	3.62305	25.4216	20.6476	231	Exon (rna-XR_001782945.3/gene-LOC100861749, exon 18 of 29)	40	33886	35505	1620	1	LOC100861738	gene-LOC100861738	9993
NT_187064.1	47406	47595	190	*	A_WT_peak_30	102	2.81364	14.3269	10.2733	32	Exon (rna-XR_001782945.3/gene-LOC100861749, exon 19 of 29)	40	52674	59689	7016	2	Pisd-ps3	rna-NR_003518.3	12094
NT_187064.1	47864	48083	220	*	A_WT_peak_31	105	2.78449	14.6056	10.5298	113	Exon (rna-XR_001782945.3/gene-LOC100861749, exon 20 of 29)	40	52674	59689	7016	2	Pisd-ps3	rna-NR_003518.3	11606
NT_187064.1	48298	48767	470	*	A_WT_peak_32	83	2.56961	12.2416	8.35506	22	Exon (rna-XR_001782945.3/gene-LOC100861749, exon 21 of 29)	40	52674	59689	7016	2	Pisd-ps3	rna-NR_003518.3	10922
NT_187064.1	50218	50614	397	*	A_WT_peak_33	181	3.18669	22.7499	18.1322	297	Exon (rna-XR_001782945.3/gene-LOC100861749, exon 25 of 29)	40	52674	59689	7016	2	Pisd-ps3	rna-NR_003518.3	9075
NT_187064.1	52898	53145	248	*	A_WT_peak_34	52	2.24092	8.77137	5.22025	31	Exon (rna-NR_003518.3/gene-Pisd-ps3, exon 7 of 7)	40	52674	59689	7016	2	Pisd-ps3	rna-NR_003518.3	6544
NT_187064.1	53319	54191	873	*	A_WT_peak_35	434	4.97424	49.3008	43.4301	206	Exon (rna-NR_003518.3/gene-Pisd-ps3, exon 7 of 7)	40	52674	59689	7016	2	Pisd-ps3	rna-NR_003518.3	5498
NT_187064.1	55043	55284	242	*	A_WT_peak_36	105	2.63313	14.588	10.5136	179	Exon (rna-NR_003518.3/gene-Pisd-ps3, exon 5 of 7)	40	52674	59689	7016	2	Pisd-ps3	rna-NR_003518.3	4405
NT_187064.1	58820	59186	367	*	A_WT_peak_37	252	3.82069	30.264	25.2173	142	Exon (rna-NR_003518.3/gene-Pisd-ps3, exon 2 of 7)	40	52674	59689	7016	2	Pisd-ps3	rna-NR_003518.3	503
NT_187064.1	59521	60238	718	*	A_WT_peak_38	566	5.66265	62.7926	56.6017	71	Promoter (<=1kb)	40	52674	59689	7016	2	Pisd-ps3	rna-NR_003518.3	0
NT_187064.1	64775	65007	233	*	A_WT_peak_39	65	2.67094	10.2051	6.5041	42	Distal Intergenic	40	52674	59689	7016	2	Pisd-ps3	rna-NR_003518.3	-5086
NT_187064.1	68162	68403	242	*	A_WT_peak_40	35	2.69027	6.78966	3.50164	5	Distal Intergenic	40	52674	59689	7016	2	Pisd-ps3	rna-NR_003518.3	-8473
NW_023337853.1	51	287	237	*	A_WT_peak_41	657	5.07481	72.0931	65.7474	91	Distal Intergenic	42	12961	27820	14860	2	LOC118568479	rna-XR_004940613.1	27533
NW_023337853.1	500	850	351	*	A_WT_peak_42	352	3.73937	40.7645	35.2049	198	Distal Intergenic	42	12961	27820	14860	2	LOC118568479	rna-XR_004940613.1	26970
NW_023337853.1	3936	4807	872	*	A_WT_peak_43	570	3.94036	63.2772	57.0774	207	Distal Intergenic	42	12961	27820	14860	2	LOC118568479	rna-XR_004940613.1	23013
NW_023337853.1	7303	7504	202	*	A_WT_peak_44	65	1.9775	10.2703	6.5631	82	Distal Intergenic	42	12961	27820	14860	2	LOC118568479	rna-XR_004940613.1	20316
NW_023337853.1	8595	9429	835	*	A_WT_peak_45	196	2.7242	24.3311	19.6204	411	Distal Intergenic	42	12961	27820	14860	2	LOC118568479	rna-XR_004940613.1	18391
NW_023337853.1	10839	11053	215	*	A_WT_peak_46	87	2.34557	12.6469	8.72618	170	Distal Intergenic	42	12961	27820	14860	2	LOC118568479	rna-XR_004940613.1	16767
NW_023337853.1	12867	13108	242	*	A_WT_peak_47	43	2.1011	7.80399	4.37028	36	Exon (rna-XR_004940613.1/gene-LOC118568479, exon 2 of 2)	42	12961	27820	14860	2	LOC118568479	rna-XR_004940613.1	14712
NW_023337853.1	14047	14306	260	*	A_WT_peak_48	117	3.09733	15.8909	11.7218	85	Exon (rna-XR_004940613.1/gene-LOC118568479, exon 2 of 2)	42	12961	27820	14860	2	LOC118568479	rna-XR_004940613.1	13514
NW_023337853.1	29917	31110	1194	*	A_WT_peak_49	2116	12.0274	219.965	211.609	994	Promoter (2-3kb)	42	12961	27820	14860	2	LOC118568479	rna-XR_004940613.1	-2097
chr1	4661822	4662002	181	*	A_WT_peak_50	19	3.80582	4.87408	1.99187	137	Intron (rna-XR_003947656.1/gene-Gm37323, intron 2 of 2)	1	4665280	4668474	3195	1	Gm39586	rna-XR_003947708.1	-3278
chr1	4681120	4681330	211	*	A_WT_peak_51	30	4.53239	6.21905	3.02288	182	Exon (gene-Gm7369/gene-Gm7369, exon 1 of 1)	1	4680467	4681852	1386	1	Gm7369	gene-Gm7369	653
chr1	4792942	4793126	185	*	A_WT_peak_52	16	3.61189	4.39482	1.65115	12	Distal Intergenic	1	4805273	4805902	630	2	Gm2053	gene-Gm2053	12776
chr1	4927691	4928471	781	*	A_WT_peak_53	147	7.37314	19.1022	14.7094	299	Promoter (<=1kb)	1	4927917	4968132	40216	1	Tcea1	rna-NM_001159750.1	0
chr1	5007590	5007775	186	*	A_WT_peak_54	29	4.49884	6.16665	2.99104	122	Intron (rna-XM_036152535.1/gene-Rgs20, intron 1 of 4)	1	5041080	5047476	6397	1	Gm16041	rna-XR_373197.3	-33305
chr1	5088197	5088499	303	*	A_WT_peak_55	25	3.97523	5.58041	2.51558	259	Intron (rna-XM_036152535.1/gene-Rgs20, intron 1 of 4)	1	4979799	5088957	109159	2	Rgs20	rna-NM_001290372.1	458
chr1	5153358	5153689	332	*	A_WT_peak_56	143	9.33426	18.6976	14.3328	249	Promoter (<=1kb)	1	5153373	5233438	80066	1	Atp6v1h	rna-XM_036152442.1	0
chr1	5176842	5177052	211	*	A_WT_peak_57	56	5.89211	9.22019	5.61837	53	Intron (rna-XM_006495433.4/gene-Atp6v1h, intron 7 of 13)	1	5180440	5233438	52999	1	Atp6v1h	rna-XM_011238336.4	-3388
chr1	5212980	5213202	223	*	A_WT_peak_58	16	3.61189	4.39482	1.65115	38	Intron (rna-XM_006495433.4/gene-Atp6v1h, intron 11 of 13)	1	5184694	5233438	48745	1	Atp6v1h	rna-XM_006495437.4	28286
chr1	5756476	5756629	154	*	A_WT_peak_59	16	3.62591	4.41615	1.65115	16	Distal Intergenic	1	5658716	5676356	17641	1	Oprk1	rna-NM_011011.2	97760
chr1	5986684	5986843	160	*	A_WT_peak_60	38	4.83261	7.21818	3.86167	154	Exon (rna-NM_010342.1/gene-Npbwr1, exon 1 of 1)	1	5983926	5987617	3692	2	Npbwr1	rna-NM_010342.1	774
chr1	6284580	6284939	360	*	A_WT_peak_61	71	5.61718	10.9015	7.13454	115	Promoter (<=1kb)	1	6284858	6335140	50283	1	Rb1cc1	rna-XM_036156298.1	0
chr1	7158993	7159419	427	*	A_WT_peak_62	104	7.43979	14.5344	10.4644	123	Promoter (<=1kb)	1	7159144	7243852	84709	1	Pcmtd1	rna-NM_183028.3	0
chr1	7467901	7468698	798	*	A_WT_peak_63	206	8.64118	25.4286	20.6537	437	Exon (rna-XR_865172.3/gene-Gm26901, exon 1 of 3)	1	7384861	7469344	84484	2	Gm26901	rna-XR_865172.3	646
chr1	9606771	9606949	179	*	A_WT_peak_64	34	4.71447	6.75553	3.47196	69	Distal Intergenic	1	9615633	9617680	2048	1	Rrs1	rna-NM_021511.2	-8684
chr1	9615244	9615786	543	*	A_WT_peak_65	218	9.77735	26.6974	21.8523	315	Promoter (<=1kb)	1	9615633	9617680	2048	1	Rrs1	rna-NM_021511.2	0
chr1	9627642	9627822	181	*	A_WT_peak_66	28	4.2156	5.96514	2.82577	42	Intron (rna-NM_001357376.1/gene-Adhfe1, intron 7 of 12)	1	9618284	9648195	29912	1	Adhfe1	rna-XM_006495586.4	9358
chr1	9770190	9771008	819	*	A_WT_peak_67	74	5.61179	11.2653	7.46548	137	Promoter (<=1kb)	1	9737632	9770664	33033	2	Mybl1	rna-XM_006495461.1	0
chr1	9778210	9778417	208	*	A_WT_peak_68	25	4.15931	5.63662	2.56073	203	Distal Intergenic	1	9741811	9770664	28854	2	Mybl1	rna-XM_011238349.3	-7546
chr1	9818226	9818772	547	*	A_WT_peak_69	272	10.5265	32.4372	27.2694	436	Promoter (<=1kb)	1	9788847	9818607	29761	2	Vcpip1	rna-NM_173443.3	0
chr1	9895902	9896178	277	*	A_WT_peak_70	41	5.05756	7.57759	4.1735	168	Intron (rna-NM_133220.2/gene-Sgk3, intron 1 of 17)	1	9918506	9972795	54290	1	Sgk3	rna-NM_001037759.1	-22328
chr1	9923448	9923645	198	*	A_WT_peak_71	20	3.76408	5.01702	2.0988	34	Intron (rna-NM_133220.2/gene-Sgk3, intron 2 of 17)	1	9918506	9972795	54290	1	Sgk3	rna-NM_001037759.1	4942
chr1	9978831	9979314	484	*	A_WT_peak_72	54	5.39003	9.07293	5.48864	218	Promoter (<=1kb)	1	9978863	10011179	32317	1	Mcmdc2	rna-NM_177722.3	0
chr1	9987732	9988078	347	*	A_WT_peak_73	23	3.95184	5.31203	2.30169	200	Intron (rna-NM_177722.3/gene-Mcmdc2, intron 7 of 14)	1	9979739	10010769	31031	1	Mcmdc2	rna-XM_011238376.3	7993
chr1	10014047	10014430	384	*	A_WT_peak_74	96	6.24616	13.6707	9.66745	322	Promoter (<=1kb)	1	10012250	10014343	2094	2	Snhg6	rna-NR_024067.2	0
chr1	10038191	10038455	265	*	A_WT_peak_75	63	5.34648	10.0423	6.357	90	Promoter (<=1kb)	1	10030388	10038207	7820	2	Tcf24	rna-XM_006495431.5	0
chr1	10068241	10068407	167	*	A_WT_peak_76	47	5.43887	8.18462	4.70202	130	Intron (rna-NM_145692.2/gene-Ppp1r42, intron 4 of 8)	1	10038847	10079361	40515	2	Ppp1r42	rna-NM_145692.2	10954
chr1	10108189	10108436	248	*	A_WT_peak_77	47	4.53893	8.21599	4.72986	180	Promoter (<=1kb)	1	10094825	10108384	13560	2	Cops5	rna-NM_001277101.1	0
chr1	10110060	10110249	190	*	A_WT_peak_78	31	3.8353	6.33401	3.11806	123	5' UTR	1	10110002	10206994	96993	1	Cspp1	rna-XM_036163264.1	58
chr1	10132423	10132626	204	*	A_WT_peak_79	87	7.11754	12.6963	8.77155	139	Intron (rna-XM_036163286.1/gene-Cspp1, intron 5 of 21)	1	10116718	10206993	90276	1	Cspp1	rna-NM_001368816.1	15705
chr1	10186043	10186276	234	*	A_WT_peak_80	29	4.2803	6.06816	2.91019	126	Exon (rna-XR_004941386.1/gene-Cspp1, exon 22 of 22)	1	10116718	10206993	90276	1	Cspp1	rna-NM_001368816.1	69325
chr1	10200832	10201001	170	*	A_WT_peak_81	31	4.16381	6.39734	3.17046	3	Intron (rna-XM_006495479.5/gene-Cspp1, intron 27 of 30)	1	10116718	10206993	90276	1	Cspp1	rna-NM_001368816.1	84114
chr1	10209629	10209807	179	*	A_WT_peak_82	34	4.53035	6.73211	3.45194	123	Intron (rna-NM_001102430.1/gene-Arfgef1, intron 37 of 37)	1	10116718	10206993	90276	1	Cspp1	rna-NM_001368816.1	92911
chr1	10248081	10248310	230	*	A_WT_peak_83	25	4.11877	5.57327	2.51035	160	Intron (rna-NM_001102430.1/gene-Arfgef1, intron 18 of 37)	1	10207732	10302895	95164	2	Arfgef1	rna-NM_001102430.1	54585
chr1	10303345	10303545	201	*	A_WT_peak_84	43	5.02767	7.82835	4.39183	142	Promoter (<=1kb)	1	10207795	10303306	95512	2	Arfgef1	rna-XR_004941387.1	-39
chr1	10874619	10874797	179	*	A_WT_peak_85	16	3.62591	4.41615	1.65115	107	Distal Intergenic	1	10916320	10939673	23354	1	Gm28659	gene-Gm28659	-41523
chr1	12031621	12031771	151	*	A_WT_peak_86	22	4.07915	5.29532	2.28939	38	Intron (rna-XR_004942886.1/gene-A830018L16Rik, intron 11 of 12)	1	12049764	12061350	11587	1	Gm30898	rna-XR_373206.4	-17993
chr1	12284170	12284362	193	*	A_WT_peak_87	22	4.07915	5.29532	2.28939	113	Distal Intergenic	1	12191163	12192256	1094	1	Gm7560	gene-Gm7560	93007
chr1	12788700	12788880	181	*	A_WT_peak_88	30	4.53239	6.21905	3.02288	157	Promoter (<=1kb)	1	12788769	12930596	141828	1	Sulf1	rna-NM_172294.1	0
chr1	12865946	12866131	186	*	A_WT_peak_89	21	3.84398	5.14275	2.19395	181	Intron (rna-XM_006495510.4/gene-Sulf1, intron 4 of 20)	1	12834607	12931131	96525	1	Sulf1	rna-XM_036164701.1	31339
chr1	13205024	13205186	163	*	A_WT_peak_90	22	3.91522	5.25461	2.28009	28	Distal Intergenic	1	13183652	13197387	13736	2	Prdm14	rna-NM_001081209.2	-7637
chr1	13262462	13262659	198	*	A_WT_peak_91	14	3.13947	4.01966	1.41516	4	Intron (rna-NM_001302702.1/gene-Ncoa2, intron 4 of 21)	1	13212642	13296183	83542	2	Ncoa2	rna-XM_030252083.2	33524
chr1	13269971	13270150	180	*	A_WT_peak_92	18	3.5731	4.71511	1.87292	112	Intron (rna-NM_001302702.1/gene-Ncoa2, intron 4 of 21)	1	13212642	13296183	83542	2	Ncoa2	rna-XM_030252083.2	26033
chr1	13442684	13443315	632	*	A_WT_peak_93	91	5.27544	13.1601	9.19722	123	Promoter (<=1kb)	1	13212642	13443007	230366	2	Ncoa2	rna-XM_017319232.3	0
chr1	13654495	13654702	208	*	A_WT_peak_94	19	3.50551	4.816	1.94761	172	Intron (rna-NM_028173.5/gene-Tram1, intron 1 of 10)	1	13634917	13660134	25218	2	Tram1	rna-NM_028173.5	5432
chr1	13659370	13659797	428	*	A_WT_peak_95	22	3.61515	5.21922	2.25268	177	Intron (rna-NM_028173.5/gene-Tram1, intron 1 of 10)	1	13634917	13660134	25218	2	Tram1	rna-NM_028173.5	337
chr1	13699415	13699606	192	*	A_WT_peak_96	37	4.93122	7.09745	3.76337	61	Intron (rna-XM_006495490.5/gene-Lactb2, intron 5 of 5)	1	13696122	13730733	34612	2	Lactb2	rna-NM_145381.2	31127
chr1	14576736	14577131	396	*	A_WT_peak_97	29	4.48293	6.1418	2.97063	233	Distal Intergenic	1	14278155	14381259	103105	2	Eya1	rna-XM_036159675.1	-195477
chr1	15485599	15485800	202	*	A_WT_peak_98	30	4.53239	6.21905	3.02288	4	Intron (rna-NM_001098528.3/gene-Kcnb2, intron 2 of 2)	1	15383235	15793975	410741	1	Kcnb2	rna-XM_006495597.5	102364
chr1	15527945	15528111	167	*	A_WT_peak_99	15	3.52403	4.26138	1.58309	3	Intron (rna-NM_001098528.3/gene-Kcnb2, intron 2 of 2)	1	15625741	15637402	11662	2	Gm51616	rna-XR_003947745.2	109291
chr1	15704607	15704762	156	*	A_WT_peak_100	30	4.38807	6.23933	3.03989	8	Intron (rna-NM_001098528.3/gene-Kcnb2, intron 2 of 2)	1	15690888	15793974	103087	1	Kcnb2	rna-XM_006495596.3	13719
chr1	15875654	15876151	498	*	A_WT_peak_101	70	5.53966	10.7586	7.00437	117	Promoter (<=1kb)	1	15875870	15914276	38407	1	Terf1	rna-NM_001286628.1	0
chr1	16163592	16163975	384	*	A_WT_peak_102	51	5.36531	8.6973	5.15395	21	Promoter (<=1kb)	1	16136203	16163549	27347	2	4930444P10Rik	rna-NM_001305227.1	-43
chr1	16174658	16175844	1187	*	A_WT_peak_103	118	6.17029	16.0189	11.8407	262	Promoter (<=1kb)	1	16171519	16174657	3139	2	Rpl7	rna-NM_011291.5	-1
chr1	16442315	16442773	459	*	A_WT_peak_104	69	5.90774	10.6678	6.92214	116	Intron (rna-XM_011238389.3/gene-Stau2, intron 8 of 12)	1	16366982	16384958	17977	2	C130013N14Rik	rna-XR_003947751.1	-57357
chr1	16573992	16574201	210	*	A_WT_peak_105	19	3.65553	4.84569	1.96979	10	Intron (rna-XM_011238389.3/gene-Stau2, intron 2 of 12)	1	16299027	16587157	288131	2	Stau2	rna-XM_011238389.3	12956
chr1	16589208	16589430	223	*	A_WT_peak_106	27	3.82549	5.81675	2.70535	49	Promoter (<=1kb)	1	16414515	16589339	174825	2	Stau2	rna-NM_001347044.1	0
chr1	16689490	16689727	238	*	A_WT_peak_107	71	6.07427	10.9525	7.18106	84	Promoter (<=1kb)	1	16611012	16689515	78504	2	Ube2w	rna-NM_001271016.2	0
chr1	16727041	16727283	243	*	A_WT_peak_108	41	4.50822	7.557	4.15578	60	Promoter (<=1kb)	1	16711949	16727115	15167	2	Eloc	rna-XM_030242571.2	0
chr1	16819426	16819994	569	*	A_WT_peak_109	34	4.69859	6.73046	3.45106	310	Distal Intergenic	1	16758680	16779829	21150	1	Ly96	rna-NM_016923.2	60746
chr1	17159861	17160036	176	*	A_WT_peak_110	18	3.67111	4.66658	1.83626	6	Intron (rna-XR_001785237.3/gene-Jph1, intron 2 of 6)	1	17065162	17168113	102952	2	Jph1	rna-NM_020604.2	8077
chr1	17167027	17167229	203	*	A_WT_peak_111	18	3.55307	4.68332	1.84905	30	Intron (rna-XR_001785237.3/gene-Jph1, intron 1 of 6)	1	17065162	17168113	102952	2	Jph1	rna-NM_020604.2	884
chr1	17167497	17167973	477	*	A_WT_peak_112	75	6.34244	11.4067	7.59321	143	5' UTR	1	17065162	17168113	102952	2	Jph1	rna-NM_020604.2	140
chr1	18094781	18094959	179	*	A_WT_peak_113	30	4.53239	6.21905	3.02288	85	Distal Intergenic	1	18017226	18019871	2646	1	Gm7690	gene-Gm7690	77555
chr1	19415490	19415704	215	*	A_WT_peak_114	30	4.53239	6.21905	3.02288	126	Distal Intergenic	1	19390405	19390943	539	2	LOC118567642	gene-LOC118567642	-24547
chr1	20814221	20814501	281	*	A_WT_peak_115	128	8.99768	17.1441	12.8862	79	Distal Intergenic	1	20801129	20804720	3592	1	Il17a	rna-NM_010552.3	13092
chr1	20890323	20890706	384	*	A_WT_peak_116	76	5.95025	11.5072	7.6843	331	Promoter (<=1kb)	1	20873188	20890407	17220	2	Mcm3	rna-XM_030251926.2	0
chr1	20941674	20941832	159	*	A_WT_peak_117	53	5.27051	8.87183	5.30943	54	Distal Intergenic	1	20958874	20960697	1824	2	6720483E21Rik	rna-NR_040492.1	18865
chr1	20960717	20960952	236	*	A_WT_peak_118	54	4.96797	9.00995	5.43225	34	Promoter (<=1kb)	1	20960772	21009874	49103	1	Paqr8	rna-NM_028829.4	0
chr1	20991272	20991655	384	*	A_WT_peak_119	20	3.88356	4.99379	2.08156	136	Intron (rna-NM_028829.4/gene-Paqr8, intron 1 of 2)	1	20988064	21009874	21811	1	Paqr8	rna-NM_001355122.1	3208
chr1	21021627	21022262	636	*	A_WT_peak_120	56	5.0852	9.22233	5.62001	148	Promoter (<=1kb)	1	21021776	21061065	39290	1	Efhc1	rna-XR_003946579.2	0
chr1	21047736	21047890	155	*	A_WT_peak_121	13	3.29502	3.91446	1.34341	124	Intron (rna-XR_003946579.2/gene-Efhc1, intron 7 of 10)	1	20995781	21029440	33660	2	Gm51618	rna-XR_003947758.1	-18296
chr1	21072814	21073197	384	*	A_WT_peak_122	37	4.37359	7.03139	3.70781	203	Exon (rna-NM_177409.3/gene-Tram2, exon 10 of 11)	1	20995781	21029440	33660	2	Gm51618	rna-XR_003947758.1	-43374
chr1	21149521	21149938	418	*	A_WT_peak_123	81	5.42149	12.0082	8.14147	97	Promoter (<=1kb)	1	21071621	21149449	77829	2	Tram2	rna-NM_177409.3	-72
chr1	21236698	21236848	151	*	A_WT_peak_124	14	3.38295	4.04757	1.43409	143	5' UTR	1	21236609	21300391	63783	1	Tmem14a	rna-XM_006495581.3	89
chr1	21364745	21364902	158	*	A_WT_peak_125	22	4.02042	5.2047	2.24139	50	Intron (rna-NR_002858.2/gene-Gm4956, intron 2 of 5)	1	21355470	21368536	13067	2	Gm4956	rna-NR_002858.2	3634
chr1	22391632	22391829	198	*	A_WT_peak_126	36	4.84554	6.9623	3.64849	150	Promoter (2-3kb)	1	22356196	22389299	33104	2	Rims1	rna-XM_036154452.1	-2333
chr1	22455738	22455961	224	*	A_WT_peak_127	21	3.96453	5.11854	2.17623	106	Intron (rna-XM_036154447.1/gene-Rims1, intron 18 of 22)	1	22356196	22389299	33104	2	Rims1	rna-XM_036154452.1	-66439
chr1	22819883	22820140	258	*	A_WT_peak_128	16	3.5237	4.43922	1.66775	105	Intron (rna-NM_001012623.4/gene-Rims1, intron 1 of 30)	1	22356463	22844881	488419	2	Rims1	rna-XM_036153963.1	24741
chr1	22844280	22844515	236	*	A_WT_peak_129	40	4.77976	7.42359	4.03981	59	Intron (rna-NM_001012623.4/gene-Rims1, intron 1 of 30)	1	22356463	22844881	488419	2	Rims1	rna-XM_036153963.1	366
chr1	23295083	23295648	566	*	A_WT_peak_130	125	7.40831	16.7908	12.5564	282	Promoter (<=1kb)	1	23295355	23333151	37797	1	LOC118567721	rna-XR_004935838.1	0
chr1	23422345	23422571	227	*	A_WT_peak_131	52	5.21271	8.77416	5.22265	91	Promoter (<=1kb)	1	23405517	23422282	16766	2	Ogfrl1	rna-NM_001379083.1	-63
chr1	23714242	23714409	168	*	A_WT_peak_132	22	4.0063	5.18293	2.22534	113	Distal Intergenic	1	23801007	23886946	85940	1	B3gat2	rna-NM_172124.2	-86598
chr1	23882551	23882757	207	*	A_WT_peak_133	19	3.73114	4.75906	1.90534	34	Intron (rna-NM_172124.2/gene-B3gat2, intron 2 of 3)	1	23883906	23948817	64912	2	Smap1	rna-NR_110972.1	66060
chr1	24044734	24044884	151	*	A_WT_peak_134	40	4.25402	7.38623	4.00741	6	Promoter (<=1kb)	1	24035020	24044721	9702	2	Sdhaf4	rna-NM_026503.3	-13
chr1	24072102	24072292	191	*	A_WT_peak_135	42	5.14306	7.71385	4.29119	143	Intron (rna-NM_026604.4/gene-Fam135a, intron 11 of 20)	1	24050171	24093116	42946	2	Fam135a	rna-XM_030242597.1	20824
chr1	24138888	24139444	557	*	A_WT_peak_136	130	6.73558	17.2738	13.0049	399	Promoter (<=1kb)	1	24049839	24139422	89584	2	Fam135a	rna-NM_026604.4	0
chr1	24192583	24192790	208	*	A_WT_peak_137	38	4.98563	7.18328	3.83141	4	Distal Intergenic	1	24216670	24249616	32947	1	Col9a1	rna-XM_006495649.3	-23880
chr1	24302312	24302697	386	*	A_WT_peak_138	42	5.12573	7.68624	4.26732	264	3' UTR	1	24234284	24291819	57536	1	Col9a1	rna-NM_001290691.1	68028
chr1	24307563	24307765	203	*	A_WT_peak_139	40	4.97485	7.44562	4.05923	54	Intron (rna-NM_007733.2/gene-Col19a1, intron 49 of 50)	1	24234284	24291819	57536	1	Col9a1	rna-NM_001290691.1	73279
chr1	24369564	24369788	225	*	A_WT_peak_140	47	5.43887	8.18462	4.70202	74	Intron (rna-NM_007733.2/gene-Col19a1, intron 19 of 50)	1	24234284	24291819	57536	1	Col9a1	rna-NM_001290691.1	135280
chr1	24411922	24412112	191	*	A_WT_peak_141	15	3.47571	4.18811	1.53216	6	Intron (rna-NM_007733.2/gene-Col19a1, intron 16 of 50)	1	24587922	24588058	137	2	Gm26418	rna-XR_004936757.1	175946
chr1	24717576	24717963	388	*	A_WT_peak_142	106	6.79975	14.7303	10.6454	163	Promoter (<=1kb)	1	24717625	24805382	87758	1	Lmbrd1	rna-NM_026719.2	0
chr1	26033896	26034098	203	*	A_WT_peak_143	47	5.43887	8.18462	4.70202	83	Distal Intergenic	1	25936051	25942689	6639	2	Gm31076	rna-XR_373279.2	-91207
chr1	26555316	26555467	152	*	A_WT_peak_144	30	4.53239	6.21905	3.02288	44	Distal Intergenic	1	26605914	26606019	106	1	Gm24064	gene-Gm24064	-50447
chr1	26726177	26726668	492	*	A_WT_peak_145	89	6.47127	12.8434	8.90581	264	Promoter (<=1kb)	1	26720882	26726541	5660	2	4931408C20Rik	rna-NM_001033764.3	0
chr1	30988099	30988336	238	*	A_WT_peak_146	42	4.59539	7.71065	4.28871	212	5' UTR	1	30979384	30988435	9052	2	Ptp4a1	rna-XM_006495799.3	99
chr1	30988768	30989127	360	*	A_WT_peak_147	75	5.87764	11.3763	7.56637	51	Promoter (<=1kb)	1	30988952	30990419	1468	1	LOC115487084	rna-NR_164183.1	0
chr1	31261571	31261741	171	*	A_WT_peak_148	38	4.98563	7.18328	3.83141	131	Promoter (<=1kb)	1	31180159	31261737	81579	2	4931428L18Rik	rna-NR_033445.1	0
chr1	31913403	31913579	177	*	A_WT_peak_149	30	4.53239	6.21905	3.02288	85	Distal Intergenic	1	31775388	31776170	783	1	Gm7910	gene-Gm7910	138015
chr1	32211395	32211852	458	*	A_WT_peak_150	82	7.02365	12.1373	8.25982	272	Promoter (<=1kb)	1	32211683	32744305	532623	1	Khdrbs2	rna-XR_001783141.2	0
chr1	33610665	33610976	312	*	A_WT_peak_151	22	4.07915	5.29532	2.28939	296	Intron (rna-NM_008922.2/gene-Prim2, intron 7 of 13)	1	33492889	33581529	88641	2	Prim2	rna-XM_011238455.3	-29136
chr1	33708687	33708904	218	*	A_WT_peak_152	29	3.98267	6.08825	2.92701	214	Promoter (<=1kb)	1	33492889	33708875	215987	2	Prim2	rna-NM_008922.2	0
chr1	33709115	33709355	241	*	A_WT_peak_153	49	4.87817	8.52208	4.99899	126	Exon (rna-NR_033199.2/gene-1700001G17Rik, exon 1 of 1)	1	33708905	33709793	889	1	1700001G17Rik	rna-NR_033199.2	210
chr1	33771960	33772210	251	*	A_WT_peak_154	57	5.14592	9.33163	5.71836	77	Intron (rna-XM_006495802.5/gene-Rab23, intron 4 of 7)	1	33759500	33781645	22146	1	Rab23	rna-NM_001159729.1	12460
chr1	33786684	33786927	244	*	A_WT_peak_155	34	4.17795	6.69093	3.41721	209	Intron (rna-NM_145392.2/gene-Bag2, intron 2 of 2)	1	33784565	33796831	12267	2	Bag2	rna-NM_145392.2	9904
chr1	33796886	33797467	582	*	A_WT_peak_156	57	5.15824	9.35374	5.73786	174	Promoter (<=1kb)	1	33784565	33796831	12267	2	Bag2	rna-NM_145392.2	-55
chr1	33928680	33928917	238	*	A_WT_peak_157	17	3.63601	4.61248	1.79604	109	Intron (rna-NM_177235.3/gene-Bend6, intron 1 of 6)	1	33912167	33913837	1671	2	Gm38471	rna-XR_373298.2	-14843
chr1	34077713	34077930	218	*	A_WT_peak_158	19	3.76811	4.816	1.94761	42	Intron (rna-XM_006495666.4/gene-Dst, intron 4 of 102)	1	34050676	34347737	297062	1	Dst	rna-NM_134448.4	27037
chr1	34142705	34142892	188	*	A_WT_peak_159	34	4.69859	6.73046	3.45106	35	Intron (rna-XM_006495666.4/gene-Dst, intron 5 of 102)	1	34156440	34156512	73	1	Mir6896	rna-NR_105861.1	-13548
chr1	34164211	34164515	305	*	A_WT_peak_160	20	3.70901	4.93019	2.03393	206	Exon (rna-XR_003948640.2/gene-Gm51742, exon 3 of 3)	1	34156658	34347733	191076	1	Dst	rna-XM_006495669.5	7553
chr1	34466414	34466591	178	*	A_WT_peak_161	22	4.07915	5.29532	2.28939	79	Promoter (2-3kb)	1	34455414	34463673	8260	2	Gm3052	rna-XR_004935980.1	-2741
chr1	34478371	34478942	572	*	A_WT_peak_162	227	8.22415	27.6478	22.745	413	Promoter (<=1kb)	1	34475751	34478753	3003	2	Ccdc115	rna-NM_027159.2	0
chr1	34512489	34512792	304	*	A_WT_peak_163	19	3.62418	4.79607	1.93327	145	Promoter (1-2kb)	1	34508941	34510579	1639	2	LOC118567734	rna-XR_004935995.1	-1910
chr1	34524605	34524832	228	*	A_WT_peak_164	43	5.21357	7.82613	4.3901	193	Exon (rna-XR_004935994.1/gene-Gm32566, exon 2 of 3)	1	34523428	34525062	1635	1	Gm32566	rna-XR_004935994.1	1177
chr1	34681909	34682120	212	*	A_WT_peak_165	14	3.44034	4.13449	1.49568	105	Distal Intergenic	1	34672616	34675291	2676	2	AA619741	rna-NR_033627.1	-6618
chr1	34935238	34935401	164	*	A_WT_peak_166	33	4.27175	6.57976	3.32385	136	Intron (gene-Gm19430/gene-Gm19430, intron 1 of 1)	1	34919021	34969724	50704	1	Gm19430	gene-Gm19430	16217
chr1	35116010	35116200	191	*	A_WT_peak_167	25	4.15931	5.63662	2.56073	87	Intron (rna-XR_004935999.1/gene-LOC118567735, intron 1 of 2)	1	35100981	35136065	35085	1	LOC118567735	rna-XR_004935998.1	15029
chr1	35285190	35285379	190	*	A_WT_peak_168	22	3.90317	5.2357	2.26505	181	Distal Intergenic	1	35218037	35218165	129	2	Gm25096	rna-XR_004936796.1	-67025
chr1	35418721	35419069	349	*	A_WT_peak_169	22	3.91522	5.25461	2.28009	95	Distal Intergenic	1	35218037	35218165	129	2	Gm25096	rna-XR_004936796.1	-200556
chr1	35504178	35504372	195	*	A_WT_peak_170	20	3.70901	4.93019	2.03393	177	Distal Intergenic	1	35218037	35218165	129	2	Gm25096	rna-XR_004936796.1	-286013
chr1	35535769	35535987	219	*	A_WT_peak_171	38	4.98563	7.18328	3.83141	146	Distal Intergenic	1	35800683	35800787	105	1	Gm25634	rna-XR_004936725.1	-264696
chr1	35802047	35802249	203	*	A_WT_peak_172	41	4.64854	7.50229	4.1082	75	Distal Intergenic	1	35800683	35800787	105	1	Gm25634	rna-XR_004936725.1	1364
chr1	36089734	36089884	151	*	A_WT_peak_173	21	3.9508	5.09739	2.16018	73	Distal Intergenic	1	36097768	36105324	7557	2	Gm39624	rna-XR_865340.3	15440
chr1	36154042	36154208	167	*	A_WT_peak_174	17	3.35374	4.56439	1.76021	105	Distal Intergenic	1	36112243	36137720	25478	2	LOC118567736	rna-XR_004936000.1	-16322
chr1	36237815	36238266	452	*	A_WT_peak_175	37	4.54259	7.03239	3.70856	322	Intron (rna-NM_198899.2/gene-Uggt1, intron 11 of 40)	1	36179109	36283383	104275	2	Uggt1	rna-NM_198899.2	45117
chr1	36408015	36408259	245	*	A_WT_peak_176	34	3.9096	6.73268	3.45222	156	Promoter (<=1kb)	1	36374811	36408224	33414	2	Kansl3	rna-XM_017320242.2	0
chr1	36483932	36484506	575	*	A_WT_peak_177	91	6.18666	13.1435	9.18204	431	Promoter (<=1kb)	1	36458274	36484351	26078	2	Lman2l	rna-XM_006495854.5	0
chr1	36501941	36502141	201	*	A_WT_peak_178	62	4.94419	9.96895	6.29103	57	Exon (rna-XR_373316.2/gene-Gm33401, exon 3 of 3)	1	36501059	36501954	896	1	Gm33401	rna-XR_373316.2	882
chr1	36550689	36551118	430	*	A_WT_peak_179	177	6.95537	22.3835	17.7877	164	Promoter (<=1kb)	1	36550948	36567318	16371	1	Cnnm3	rna-NM_001039551.2	0
chr1	36570369	36570665	297	*	A_WT_peak_180	35	3.71147	6.84334	3.54703	13	3' UTR	1	36569269	36574732	5464	2	Ankrd23	rna-XM_036154424.1	4067
chr1	36586160	36586549	390	*	A_WT_peak_181	135	5.91731	17.8824	13.5737	192	Promoter (<=1kb)	1	36577252	36586333	9082	2	Ankrd39	rna-NM_001310533.1	0
chr1	36699770	36700127	358	*	A_WT_peak_182	41	4.51893	7.57594	4.17222	302	5' UTR	1	36601779	36683076	81298	2	Fam178b	rna-XM_030255205.1	-16694
chr1	36721839	36722299	461	*	A_WT_peak_183	22	3.39473	5.27146	2.28939	278	Promoter (<=1kb)	1	36601777	36722264	120488	2	Fam178b	rna-NM_001126046.1	0
chr1	36730282	36730856	575	*	A_WT_peak_184	23	3.42751	5.33297	2.3188	396	Promoter (<=1kb)	1	36730568	36732469	1902	1	Cox5b	rna-NM_009942.2	0
chr1	36737519	36737715	197	*	A_WT_peak_185	18	3.00966	4.72024	1.87667	74	3' UTR	1	36730568	36732469	1902	1	Cox5b	rna-NM_009942.2	6951
chr1	36748588	36749014	427	*	A_WT_peak_186	39	4.08311	7.33918	3.9669	171	Promoter (<=1kb)	1	36738283	36749006	10724	2	Actr1b	rna-NM_146107.2	0
chr1	36768405	36768631	227	*	A_WT_peak_187	29	4.15877	6.12695	2.95839	80	Intron (rna-XM_036153674.1/gene-4933424G06Rik, intron 4 of 9)	1	36763999	36797040	33042	1	4933424G06Rik	rna-XM_036153670.1	4406
chr1	36795613	36795873	261	*	A_WT_peak_188	26	3.77294	5.72524	2.63197	225	Intron (rna-XM_036153674.1/gene-4933424G06Rik, intron 9 of 9)	1	36800879	36821901	21023	1	Zap70	rna-NM_009539.3	-5006
chr1	36825244	36825635	392	*	A_WT_peak_189	26	3.676	5.79283	2.68569	48	Distal Intergenic	1	36818065	36821901	3837	1	Zap70	rna-NM_001289612.1	7179
chr1	36896137	36896326	190	*	A_WT_peak_190	24	3.95269	5.54414	2.4872	117	Intron (rna-NM_018872.2/gene-Tmem131, intron 4 of 40)	1	36818065	36821901	3837	1	Zap70	rna-NM_001289612.1	78072
chr1	36913890	36914164	275	*	A_WT_peak_191	35	4.62681	6.88773	3.58522	28	Intron (rna-NM_018872.2/gene-Tmem131, intron 3 of 40)	1	36831270	36978608	147339	2	Tmem131	rna-NM_018872.2	64444
chr1	36978420	36979185	766	*	A_WT_peak_192	58	4.84826	9.44559	5.82035	287	Promoter (<=1kb)	1	36831270	36978608	147339	2	Tmem131	rna-NM_018872.2	0
chr1	37165459	37165743	285	*	A_WT_peak_193	30	4.26368	6.29885	3.08903	194	Intron (rna-XM_006496379.3/gene-Vwa3b, intron 13 of 22)	1	37152417	37226689	74273	1	Vwa3b	rna-XR_001778880.2	13042
chr1	37194121	37194279	159	*	A_WT_peak_194	18	3.68296	4.68484	1.84941	45	Intron (rna-XM_006496379.3/gene-Vwa3b, intron 19 of 22)	1	37171354	37189177	17824	2	Gm37020	rna-XR_865351.2	-4944
chr1	37300183	37300354	172	*	A_WT_peak_195	19	3.61384	4.77971	1.92069	27	Exon (rna-XM_017313745.3/gene-Cnga3, exon 7 of 7)	1	37269701	37302465	32765	1	Cnga3	rna-XM_036157115.1	30482
chr1	37338904	37339421	518	*	A_WT_peak_196	144	7.7198	18.8389	14.4646	145	Promoter (<=1kb)	1	37338908	37443097	104190	1	Inpp4a	rna-XM_006496008.3	0
chr1	37438081	37438249	169	*	A_WT_peak_197	15	3.12803	4.18511	1.53043	141	Intron (rna-XM_006496008.3/gene-Inpp4a, intron 25 of 25)	1	37408298	37443523	35226	1	Inpp4a	rna-NM_172971.3	29783
chr1	37458433	37458778	346	*	A_WT_peak_198	69	5.7219	10.7179	6.96757	249	3' UTR	1	37456166	37469184	13019	2	Coa5	rna-NM_198006.4	10406
chr1	37468677	37468924	248	*	A_WT_peak_199	30	3.94572	6.28013	3.07325	53	Intron (rna-NM_198006.4/gene-Coa5, intron 1 of 2)	1	37456166	37469184	13019	2	Coa5	rna-NM_198006.4	260
chr1	37615315	37615496	182	*	A_WT_peak_200	20	3.73085	4.96463	2.05936	46	Distal Intergenic	1	37478421	37580599	102179	2	Mgat4a	rna-XM_036165442.1	-34716
chr1	37623799	37624038	240	*	A_WT_peak_201	28	4.08067	5.99838	2.85287	231	Distal Intergenic	1	37653588	37654454	867	1	4930556I23Rik	rna-XR_373329.1	-29550
chr1	37652596	37652871	276	*	A_WT_peak_202	28	3.92574	5.99028	2.84653	23	Promoter (<=1kb)	1	37653588	37654454	867	1	4930556I23Rik	rna-XR_373329.1	-717
chr1	37747068	37747231	164	*	A_WT_peak_203	23	3.84373	5.3683	2.34685	25	Intron (rna-NM_028096.1/gene-Cracdl, intron 1 of 9)	1	37650758	37757906	107149	2	Cracdl	rna-XM_036153696.1	10675
chr1	37903639	37904526	888	*	A_WT_peak_204	253	8.26959	30.417	25.3605	461	Promoter (<=1kb)	1	37793651	37904055	110405	2	Tsga10	rna-XM_006495822.4	0
chr1	38036003	38036514	512	*	A_WT_peak_205	129	5.9693	17.1977	12.9351	325	Promoter (<=1kb)	1	38022948	38036289	13342	2	Txndc9	rna-NM_172054.4	0
chr1	38037111	38037598	488	*	A_WT_peak_206	58	4.28895	9.50667	5.87502	125	5' UTR	1	38037091	38094660	57570	1	Eif5b	rna-NM_198303.2	20
chr1	38116054	38116214	161	*	A_WT_peak_207	24	3.93041	5.50825	2.45864	59	Intron (rna-XM_036152482.1/gene-Rev1, intron 3 of 17)	1	38091867	38124735	32869	2	Rev1	rna-XM_036152482.1	8521
chr1	38149530	38149798	269	*	A_WT_peak_208	56	5.89211	9.22019	5.61837	231	Promoter (1-2kb)	1	38091867	38147535	55669	2	Rev1	rna-XM_006496161.3	-1995
chr1	38161355	38161585	231	*	A_WT_peak_209	44	5.04306	7.85336	4.41365	189	5' UTR	1	38091867	38167301	75435	2	Rev1	rna-XM_036152476.1	5716
chr1	38168689	38169244	556	*	A_WT_peak_210	68	5.06303	10.5509	6.81669	284	Promoter (<=1kb)	1	38091867	38168747	76881	2	Rev1	rna-NM_001359287.1	0
chr1	38200981	38201160	180	*	A_WT_peak_211	17	3.57897	4.52452	1.73038	53	Distal Intergenic	1	38171164	38198973	27810	1	Gm5099	rna-NR_151587.1	29817
chr1	38211833	38211993	161	*	A_WT_peak_212	25	4.14571	5.61537	2.5444	125	Distal Intergenic	1	38171164	38198973	27810	1	Gm5099	rna-NR_151587.1	40669
chr1	38259714	38260045	332	*	A_WT_peak_213	45	4.74445	7.97124	4.51705	105	Exon (rna-XR_001778890.3/gene-Gm16150, exon 1 of 5)	1	38257962	38286732	28771	1	Gm16150	rna-XR_865363.4	1752
chr1	38297129	38297477	349	*	A_WT_peak_214	46	4.98828	8.07375	4.60777	31	Intron (rna-NM_001290814.1/gene-Aff3, intron 9 of 21)	1	38257962	38286732	28771	1	Gm16150	rna-XR_865363.4	39167
chr1	38354773	38354944	172	*	A_WT_peak_215	30	4.53239	6.21905	3.02288	68	Intron (rna-NM_001290814.1/gene-Aff3, intron 8 of 21)	1	38415302	38433084	17783	1	Gm16152	rna-XR_004936002.1	-60358
chr1	38495830	38496013	184	*	A_WT_peak_216	21	3.97836	5.13985	2.19193	153	Intron (rna-NM_001290814.1/gene-Aff3, intron 4 of 21)	1	38415302	38433084	17783	1	Gm16152	rna-XR_004936011.1	80528
chr1	38667559	38667757	199	*	A_WT_peak_217	20	3.83139	4.91345	2.02044	162	Promoter (1-2kb)	1	38215072	38666325	451254	2	Aff3	rna-NM_001290814.1	-1234
chr1	38759763	38759968	206	*	A_WT_peak_218	25	4.17301	5.65801	2.57763	97	Distal Intergenic	1	38728556	38728698	143	2	LOC115487659	rna-XR_004936784.1	-31065
chr1	38806079	38806315	237	*	A_WT_peak_219	45	5.12143	7.98052	4.52591	76	Distal Intergenic	1	38832750	38875768	43019	2	Lonrf2	rna-NM_001029878.2	69453
chr1	38926298	38926510	213	*	A_WT_peak_220	48	5.13255	8.31351	4.81527	154	Intron (rna-XM_006496364.5/gene-Chst10, intron 2 of 6)	1	38902953	38937068	34116	2	Chst10	rna-XM_030243883.1	10558
chr1	38990016	38990226	211	*	A_WT_peak_221	18	3.70689	4.72171	1.87726	52	Distal Intergenic	1	38978230	38989357	11128	1	Nms	rna-NM_001311788.1	11786
chr1	39026587	39027101	515	*	A_WT_peak_222	135	7.23216	17.8587	13.5517	165	Promoter (<=1kb)	1	39026895	39036317	9423	1	Pdcl3	rna-NM_026850.4	0
chr1	39087908	39088072	165	*	A_WT_peak_223	22	4.03464	5.22663	2.25879	43	Distal Intergenic	1	39065088	39066438	1351	2	Gm35222	rna-XR_373346.1	-21470
chr1	39113453	39113609	157	*	A_WT_peak_224	16	3.62591	4.41615	1.65115	38	Distal Intergenic	1	39065088	39066438	1351	2	Gm35222	rna-XR_373346.1	-47015
chr1	39264516	39264684	169	*	A_WT_peak_225	19	3.63457	4.81252	1.94558	87	Intron (rna-XM_011238452.4/gene-Npas2, intron 1 of 20)	1	39233353	39402321	168969	1	Npas2	rna-NM_008719.2	31163
chr1	39406641	39406920	280	*	A_WT_peak_226	111	6.6469	15.314	11.1867	198	Promoter (<=1kb)	1	39406932	39410992	4061	1	Rpl31	rna-NM_001252218.1	-12
chr1	39415870	39416086	217	*	A_WT_peak_227	35	4.25815	6.83108	3.53644	88	Exon (rna-NM_018775.4/gene-Tbc1d8, exon 16 of 20)	1	39406932	39410992	4061	1	Rpl31	rna-NM_053257.3	8938
chr1	39478437	39478619	183	*	A_WT_peak_228	66	5.54125	10.3949	6.67537	88	Intron (rna-NM_018775.4/gene-Tbc1d8, intron 1 of 19)	1	39410576	39517828	107253	2	Tbc1d8	rna-NM_018775.4	39209
chr1	39517807	39518166	360	*	A_WT_peak_229	42	4.42093	7.69564	4.27523	37	Promoter (<=1kb)	1	39410576	39517828	107253	2	Tbc1d8	rna-NM_018775.4	0
chr1	39538545	39538974	430	*	A_WT_peak_230	353	12.032	40.8717	35.3065	219	Distal Intergenic	1	39558614	39558828	215	1	Gm24826	rna-XR_004936874.1	-19640
chr1	39566556	39566730	175	*	A_WT_peak_231	28	4.11378	6.05295	2.8975	151	Distal Intergenic	1	39558614	39558828	215	1	Gm24826	rna-XR_004936874.1	7942
chr1	39574876	39575236	361	*	A_WT_peak_232	46	4.51043	8.16223	4.68545	214	Promoter (<=1kb)	1	39568400	39574800	6401	2	LOC118567738	rna-XR_004936030.1	-76
chr1	39616410	39616740	331	*	A_WT_peak_233	130	7.42685	17.2995	13.0286	178	Promoter (<=1kb)	1	39590377	39616428	26052	2	Rnf149	rna-NM_001033135.3	0
chr1	39656935	39657198	264	*	A_WT_peak_234	32	4.38664	6.49922	3.25584	186	Distal Intergenic	1	39636581	39640174	3594	2	Gm5100	gene-Gm5100	-16761
chr1	39724263	39724480	218	*	A_WT_peak_235	28	3.77773	5.978	2.83642	177	Intron (rna-XM_011238564.4/gene-Rfx8, intron 4 of 10)	1	39704459	39731396	26938	2	Rfx8	rna-XM_011238564.4	6916
chr1	39794971	39795257	287	*	A_WT_peak_236	37	4.06637	7.03281	3.70864	101	Distal Intergenic	1	39704461	39760149	55689	2	Rfx8	rna-NM_001145660.1	-34822
chr1	39866272	39866627	356	*	A_WT_peak_237	50	5.10084	8.58429	5.05465	287	Distal Intergenic	1	39881588	39886490	4903	2	1700066B17Rik	rna-NR_040465.1	19863
chr1	40045609	40045783	175	*	A_WT_peak_238	18	3.27995	4.64167	1.81831	32	Intron (rna-XM_006496041.3/gene-Map4k4, intron 18 of 32)	1	40123872	40164385	40514	1	Il1r2	rna-XR_003952769.2	-78089
chr1	40131169	40131380	212	*	A_WT_peak_239	19	3.61384	4.77971	1.92069	4	Intron (rna-XR_003952769.2/gene-Il1r2, intron 1 of 8)	1	40125253	40164390	39138	1	Il1r2	rna-NM_001360800.1	5916
chr1	40155708	40155942	235	*	A_WT_peak_240	88	7.16487	12.7742	8.84244	40	Intron (rna-XR_003952769.2/gene-Il1r2, intron 5 of 8)	1	40146215	40164387	18173	1	Il1r2	rna-XM_006495726.4	9493
chr1	40340700	40340980	281	*	A_WT_peak_241	54	5.56729	9.02781	5.4481	219	Intron (rna-XM_006495713.4/gene-Il1r1, intron 10 of 13)	1	40363697	40406722	43026	1	Il1rl2	rna-XM_036165947.1	-22717
chr1	40380203	40380389	187	*	A_WT_peak_242	14	3.41715	4.09937	1.47028	12	Intron (rna-XM_036165947.1/gene-Il1rl2, intron 5 of 11)	1	40393021	40393767	747	1	Gm17970	gene-Gm17970	-12632
chr1	40838256	40838555	300	*	A_WT_peak_243	32	4.56028	6.51201	3.26659	295	Distal Intergenic	1	40844738	40896047	51310	1	Tmem182	rna-XM_017321461.2	-6183
chr1	41297658	41297872	215	*	A_WT_peak_244	20	3.81856	4.8937	2.00626	98	Distal Intergenic	1	41206720	41220412	13693	2	4930448I06Rik	rna-NR_040475.1	-77246
chr1	41454029	41454179	151	*	A_WT_peak_245	30	4.53239	6.21905	3.02288	121	Distal Intergenic	1	41431364	41433693	2330	1	LOC118567740	rna-XR_004936036.1	22665
chr1	41747398	41748068	671	*	A_WT_peak_246	54	5.80727	9.08424	5.4988	315	Distal Intergenic	1	41782183	41978758	196576	1	Gm29260	rna-XR_004936043.1	-34115
chr1	41814125	41814304	180	*	A_WT_peak_247	22	4.07915	5.29532	2.28939	175	Intron (rna-XR_004936043.1/gene-Gm29260, intron 1 of 8)	1	41782197	41978758	196562	1	Gm29260	rna-XR_004936041.1	31928
chr1	42890047	42890667	621	*	A_WT_peak_248	175	9.47075	22.1423	17.561	283	Promoter (<=1kb)	1	42890393	42944843	54451	1	Mrps9	rna-NM_023514.4	0
chr1	42941972	42942259	288	*	A_WT_peak_249	13	3.29502	3.91446	1.34341	59	Intron (rna-NM_023514.4/gene-Mrps9, intron 9 of 10)	1	42918915	42944843	25929	1	Mrps9	rna-XM_036153502.1	23057
chr1	43104897	43105106	210	*	A_WT_peak_250	25	3.87287	5.65348	2.57453	28	Intron (rna-NM_001357299.1/gene-Tgfbrap1, intron 4 of 11)	1	43093821	43096294	2474	1	Gm28782	rna-XR_865397.2	11076
chr1	43131091	43131243	153	*	A_WT_peak_251	35	4.44457	6.86937	3.56922	50	Promoter (<=1kb)	1	43131440	43133002	1563	1	8430432A02Rik	rna-XR_003947575.1	-197
chr1	43137680	43138165	486	*	A_WT_peak_252	68	6.09493	10.6088	6.86929	204	Promoter (<=1kb)	1	43137870	43155106	17237	1	AI597479	rna-NM_133818.1	0
chr1	43162818	43163025	208	*	A_WT_peak_253	26	4.09189	5.76756	2.66575	184	Exon (rna-NM_010212.4/gene-Fhl2, exon 6 of 6)	1	43137870	43155106	17237	1	AI597479	rna-NM_133818.1	24948
chr1	43203191	43203371	181	*	A_WT_peak_254	20	3.70901	4.93019	2.03393	145	Promoter (<=1kb)	1	43162231	43203121	40891	2	Fhl2	rna-NM_010212.4	-70
chr1	43551327	43551486	160	*	A_WT_peak_255	20	3.70901	4.93019	2.03393	142	Intron (rna-XM_030252054.1/gene-Nck2, intron 2 of 4)	1	43484911	43609678	124768	1	Nck2	rna-NM_010879.3	66416
chr1	43770044	43770266	223	*	A_WT_peak_256	22	4.07915	5.29532	2.28939	199	5' UTR	1	43769762	43781724	11963	1	Ecrg4	rna-NM_024283.3	282
chr1	43820385	43820607	223	*	A_WT_peak_257	19	3.7806	4.83523	1.96205	149	Intron (rna-NM_001368289.1/gene-Uxs1, intron 6 of 14)	1	43824981	43826664	1684	1	Gm16103	gene-Gm16103	-4374
chr1	43866440	43867169	730	*	A_WT_peak_258	219	8.99067	26.7501	21.9013	641	Promoter (<=1kb)	1	43786121	43866999	80879	2	Uxs1	rna-NM_001368287.1	0
chr1	43898493	43898751	259	*	A_WT_peak_259	19	3.7806	4.83523	1.96205	129	Distal Intergenic	1	43927141	43928880	1740	1	Gm19587	gene-Gm19587	-28390
chr1	43972869	43973639	771	*	A_WT_peak_260	192	8.71091	23.9559	19.2688	234	Promoter (<=1kb)	1	43973130	44042160	69031	1	Tpp2	rna-XR_001784011.2	0
chr1	44007418	44007572	155	*	A_WT_peak_261	21	3.9508	5.09739	2.16018	78	Intron (rna-XR_001784011.2/gene-Tpp2, intron 10 of 28)	1	43973154	44042160	69007	1	Tpp2	rna-NM_009418.3	34264
chr1	44032848	44033142	295	*	A_WT_peak_262	20	3.88356	4.99379	2.08156	182	Intron (rna-XR_001784011.2/gene-Tpp2, intron 26 of 28)	1	44048559	44059161	10603	2	Mettl21c	rna-XM_006496126.5	26019
chr1	44141324	44141912	589	*	A_WT_peak_263	31	4.14287	6.36181	3.14116	415	Promoter (<=1kb)	1	44125773	44141601	15829	2	Tex30	rna-NM_001356296.1	0
chr1	44157807	44158025	219	*	A_WT_peak_264	26	3.7816	5.74035	2.64411	193	Promoter (<=1kb)	1	44145706	44157933	12228	2	Poglut2	rna-NM_023645.3	0
chr1	44158523	44159314	792	*	A_WT_peak_265	60	5.17666	9.73083	6.07743	544	Promoter (<=1kb)	1	44158621	44183677	25057	1	Bivm	rna-XM_030254293.1	0
chr1	44186812	44186976	165	*	A_WT_peak_266	17	3.55666	4.49009	1.70544	4	Promoter (<=1kb)	1	44186904	44220420	33517	1	Ercc5	rna-NM_011729.2	0
chr1	44589314	44589470	157	*	A_WT_peak_267	22	4.07915	5.29532	2.28939	107	Promoter (1-2kb)	1	44590540	44835998	245459	1	Gulp1	rna-XM_006496276.4	-1070
chr1	44590987	44591161	175	*	A_WT_peak_268	16	3.62591	4.41615	1.65115	146	Promoter (<=1kb)	1	44591059	44835998	244940	1	Gulp1	rna-XM_011238599.3	0
chr1	45834281	45834906	626	*	A_WT_peak_269	192	9.83239	23.9249	19.2397	329	Promoter (<=1kb)	1	45834313	45862779	28467	1	Wdr75	rna-XR_004934780.1	0
chr1	45965253	45965612	360	*	A_WT_peak_270	56	5.89211	9.22019	5.61837	244	5' UTR	1	45947240	45965689	18450	2	Slc40a1	rna-XM_006496137.4	77
chr1	46001667	46001825	159	*	A_WT_peak_271	16	3.62591	4.41615	1.65115	7	Distal Intergenic	1	46020691	46021227	537	1	Rpl23a-ps1	gene-Rpl23a-ps1	-18866
chr1	46105861	46106219	359	*	A_WT_peak_272	28	4.40504	6.0202	2.87101	185	Promoter (<=1kb)	1	46106013	46412706	306694	1	Dnah7b	rna-NM_001368717.1	0
chr1	46892494	46893255	762	*	A_WT_peak_273	358	10.6623	41.4627	35.876	447	Promoter (<=1kb)	1	46846704	46892778	46075	2	Slc39a10	rna-NM_001356416.1	0
chr1	46946528	46946685	158	*	A_WT_peak_274	29	4.43587	6.06832	2.91019	96	Intron (rna-NM_001356417.1/gene-Slc39a10, intron 1 of 10)	1	46846704	46964936	118233	2	Slc39a10	rna-NM_001356417.1	18251
chr1	46946993	46947167	175	*	A_WT_peak_275	15	3.4997	4.22448	1.55775	82	Intron (rna-NM_001356417.1/gene-Slc39a10, intron 1 of 10)	1	46846704	46964936	118233	2	Slc39a10	rna-NM_001356417.1	17769
chr1	50961810	50961996	187	*	A_WT_peak_276	24	4.07901	5.51111	2.46042	100	Intron (rna-XM_030255650.2/gene-Tmeff2, intron 2 of 11)	1	50966682	51226429	259748	1	Tmeff2	rna-NM_019790.4	-4686
chr1	50966347	50966724	378	*	A_WT_peak_277	84	6.67622	12.3723	8.47403	163	Promoter (<=1kb)	1	50966682	51226429	259748	1	Tmeff2	rna-NM_019790.4	0
chr1	51321893	51322059	167	*	A_WT_peak_278	22	4.07915	5.29532	2.28939	160	Intron (rna-NR_045151.2/gene-9330175M20Rik, intron 2 of 4)	1	51328285	51342119	13835	1	Cavin2	rna-NM_138741.1	-6226
chr1	51517484	51517959	476	*	A_WT_peak_279	228	10.0346	27.7986	22.8888	213	Promoter (<=1kb)	1	51504127	51517584	13458	2	Nabp1	rna-XR_001785084.3	0
chr1	51899428	51899912	485	*	A_WT_peak_280	40	4.95864	7.41973	4.03674	119	Intron (rna-NM_001161817.2/gene-Myo1b, intron 3 of 30)	1	51789033	51918762	129730	2	Myo1b	rna-XM_006495769.3	18850
chr1	51954173	51954383	211	*	A_WT_peak_281	26	4.10393	5.78683	2.6817	135	Promoter (<=1kb)	1	51954778	51959147	4370	1	Gm33795	rna-XR_001778914.3	-395
chr1	52146898	52147081	184	*	A_WT_peak_282	19	3.63457	4.81252	1.94558	46	Intron (rna-XR_373397.5/gene-Gm31812, intron 2 of 2)	1	52146151	52153058	6908	2	Gm31812	rna-XR_373397.5	5977
chr1	52272215	52272842	628	*	A_WT_peak_283	180	8.08959	22.631	18.0207	322	Promoter (<=1kb)	1	52202608	52272391	69784	2	Gls	rna-NM_001081081.2	0
chr1	52369622	52369793	172	*	A_WT_peak_284	22	4.07915	5.29532	2.28939	18	Intron (rna-XR_373401.2/gene-Gm31955, intron 1 of 2)	1	52382450	52407164	24715	1	Gm31955	rna-XR_373400.2	-12657
chr1	52697334	52697527	194	*	A_WT_peak_285	28	4.37463	5.97275	2.83217	165	3' UTR	1	52669864	52691078	21215	1	Nemp2	rna-NR_024590.1	27470
chr1	52723255	52723455	201	*	A_WT_peak_286	29	4.49884	6.16665	2.99104	82	Intron (rna-NM_001357464.1/gene-Mfsd6, intron 2 of 7)	1	52695458	52766044	70587	2	Mfsd6	rna-XM_006496374.5	42589
chr1	52856355	52856539	185	*	A_WT_peak_287	31	4.44401	6.32801	3.11289	149	Intron (rna-XM_036162241.1/gene-Inpp1, intron 1 of 6)	1	52824584	52856748	32165	2	Inpp1	rna-XM_036162241.1	209
chr1	52883946	52884332	387	*	A_WT_peak_288	250	10.3043	30.1407	25.0994	76	Promoter (<=1kb)	1	52884197	52960145	75949	1	Hibch	rna-NM_146108.2	0
chr1	53335897	53336454	558	*	A_WT_peak_289	89	6.5212	12.9325	8.98831	281	Promoter (<=1kb)	1	53336254	53349404	13151	1	Ormdl1	rna-NM_145517.4	0
chr1	53824211	53824572	362	*	A_WT_peak_290	180	8.85508	22.6253	18.0155	223	Promoter (<=1kb)	1	53794671	53824323	29653	2	Stk17b	rna-XM_006496359.5	0
chr1	54017643	54017803	161	*	A_WT_peak_291	27	4.00545	5.87402	2.75203	2	5' UTR	1	53846031	54018040	172010	2	Hecw2	rna-XM_006496069.5	237
chr1	54117029	54117187	159	*	A_WT_peak_292	22	4.0063	5.18293	2.22534	9	Intron (rna-XM_006496066.5/gene-Hecw2, intron 1 of 28)	1	53846031	54018040	172010	2	Hecw2	rna-XM_006496069.5	-98989
chr1	54289892	54290224	333	*	A_WT_peak_293	65	6.34535	10.2875	6.57794	208	Promoter (<=1kb)	1	54290017	54407767	117751	1	Ccdc150	rna-XM_017312898.1	0
chr1	54382367	54382568	202	*	A_WT_peak_294	22	4.07915	5.29532	2.28939	47	Intron (rna-XM_006496341.3/gene-Ccdc150, intron 14 of 14)	1	54368642	54407767	39126	1	Ccdc150	rna-XM_006496340.3	13725
chr1	54596506	54597055	550	*	A_WT_peak_295	78	6.76591	11.7161	7.87513	282	Promoter (<=1kb)	1	54512159	54596843	84685	2	Pgap1	rna-NM_001163314.2	0
chr1	54770717	54770909	193	*	A_WT_peak_296	28	4.4204	6.04418	2.89053	186	Intron (rna-XR_003948658.1/gene-4930444A19Rik, intron 4 of 4)	1	54720710	54805513	84804	1	4930444A19Rik	rna-XR_004936104.1	50007
chr1	54994280	54994437	158	*	A_WT_peak_297	17	3.55666	4.49009	1.70544	77	Distal Intergenic	1	54684499	54968142	283644	2	Ankrd44	rna-XM_036165753.1	-26138
chr1	55066490	55066939	450	*	A_WT_peak_298	108	6.28046	14.9963	10.8906	152	Promoter (<=1kb)	1	55024328	55066637	42310	2	Sf3b1	rna-NM_031179.2	0
chr1	55091603	55092072	470	*	A_WT_peak_299	126	6.38306	16.9297	12.6865	259	Promoter (<=1kb)	1	55091929	55111861	19933	1	Coq10b	rna-NM_001039710.1	0
chr1	55114937	55115115	179	*	A_WT_peak_300	42	4.54052	7.61404	4.20498	47	Distal Intergenic	1	55105412	55106267	856	1	Gm17971	gene-Gm17971	9525
chr1	55126520	55127574	1055	*	A_WT_peak_301	90	5.05045	12.9756	9.02715	642	Promoter (<=1kb)	1	55116992	55127402	10411	2	Hspd1	rna-NM_001356512.1	0
chr1	55141999	55142304	306	*	A_WT_peak_302	43	4.66301	7.82919	4.3922	119	Distal Intergenic	1	55116992	55127402	10411	2	Hspd1	rna-NM_001356512.1	-14597
chr1	55153724	55153900	177	*	A_WT_peak_303	14	3.26176	4.03349	1.42455	47	Distal Intergenic	1	55159215	55160051	837	2	Gm5147	gene-Gm5147	6151
chr1	55211178	55211568	391	*	A_WT_peak_304	34	4.37379	6.75111	3.46865	109	Exon (rna-NM_001356287.1/gene-Rftn2, exon 8 of 8)	1	55199802	55200255	454	2	Gm6822	gene-Gm6822	-10923
chr1	55276288	55276811	524	*	A_WT_peak_305	67	5.20828	10.4904	6.76206	137	Promoter (<=1kb)	1	55276336	55279217	2882	1	Mars2	rna-NM_175439.3	0
chr1	55401834	55402262	429	*	A_WT_peak_306	87	6.15108	12.6689	8.7466	227	Promoter (<=1kb)	1	55338894	55401887	62994	2	Boll	rna-NM_001113367.3	0
chr1	55402850	55403028	179	*	A_WT_peak_307	33	4.11022	6.57189	3.31705	125	Promoter (<=1kb)	1	55282725	55402948	120224	2	Boll	rna-XR_373267.4	0
chr1	55625493	55625650	158	*	A_WT_peak_308	16	3.62591	4.41615	1.65115	93	Intron (rna-XM_036164399.1/gene-Plcl1, intron 1 of 5)	1	55541201	55551979	10779	2	Gm39642	rna-XR_003947824.2	-73514
chr1	55644305	55644491	187	*	A_WT_peak_309	22	4.07915	5.29532	2.28939	103	Intron (rna-XM_036164399.1/gene-Plcl1, intron 1 of 5)	1	55541201	55551979	10779	2	Gm39642	rna-XR_003947824.2	-92326
chr1	55908560	55908716	157	*	A_WT_peak_310	26	4.2571	5.78931	2.68317	34	Distal Intergenic	1	55928079	55956378	28300	1	Gm32949	rna-XR_001778930.3	-19363
chr1	55936377	55936551	175	*	A_WT_peak_311	22	4.07915	5.29532	2.28939	134	Intron (rna-XR_001778930.3/gene-Gm32949, intron 1 of 1)	1	55928079	55956378	28300	1	Gm32949	rna-XR_373419.5	8298
chr1	56822002	56822236	235	*	A_WT_peak_312	22	4.07915	5.29532	2.28939	35	Distal Intergenic	1	56924556	56933373	8818	1	Gm51624	rna-XR_003947825.1	-102320
chr1	57011950	57012264	315	*	A_WT_peak_313	20	3.46684	4.9656	2.05983	185	Promoter (<=1kb)	1	56833140	57011954	178815	2	Satb2	rna-XM_036163316.1	0
chr1	57416751	57417253	503	*	A_WT_peak_314	40	4.80765	7.46931	4.0799	237	Promoter (<=1kb)	1	57416755	57419194	2440	1	1700066M21Rik	rna-XM_030243183.1	0
chr1	57445769	57446116	348	*	A_WT_peak_315	60	5.95993	9.66536	6.01831	140	Promoter (<=1kb)	1	57427403	57445833	18431	2	Tyw5	rna-NM_001037742.2	0
chr1	57621413	57621717	305	*	A_WT_peak_316	39	4.86351	7.26765	3.90434	268	Distal Intergenic	1	57622090	57622231	142	2	LOC115487664	rna-XR_004936788.1	514
chr1	57798573	57798750	178	*	A_WT_peak_317	14	3.36053	4.01363	1.41118	76	Distal Intergenic	1	57813261	57987557	174297	1	Spats2l	rna-XM_006496210.5	-14511
chr1	58017894	58018077	184	*	A_WT_peak_318	38	4.98563	7.18328	3.83141	15	Distal Intergenic	1	58024499	58065056	40558	1	Sgo2a	rna-NM_001177867.1	-6422
chr1	58035071	58035276	206	*	A_WT_peak_319	26	3.9534	5.78765	2.68211	3	Promoter (<=1kb)	1	58035133	58065436	30304	1	Sgo2a	rna-NM_199007.2	0
chr1	58069093	58069284	192	*	A_WT_peak_320	41	4.67303	7.54383	4.14435	57	Promoter (<=1kb)	1	58069128	58145569	76442	1	Aox1	rna-NM_009676.2	0
chr1	58081747	58081918	172	*	A_WT_peak_321	24	4.09218	5.5317	2.47733	80	Intron (rna-XM_006495630.5/gene-Aox1, intron 2 of 19)	1	58069128	58145569	76442	1	Aox1	rna-NM_009676.2	12619
chr1	58431821	58432299	479	*	A_WT_peak_322	200	8.82442	24.7379	20.0026	160	Promoter (<=1kb)	1	58432057	58446513	14457	1	Bzw1	rna-NM_025824.4	0
chr1	58463185	58463464	280	*	A_WT_peak_323	77	5.59513	11.6096	7.77733	56	Promoter (<=1kb)	1	58451147	58463247	12101	2	Clk1	rna-NM_001042634.2	0
chr1	58484416	58484941	526	*	A_WT_peak_324	51	4.79123	8.6862	5.14377	149	Promoter (<=1kb)	1	58484776	58500684	15909	1	Nif3l1	rna-XM_006496186.2	0
chr1	58502786	58502973	188	*	A_WT_peak_325	20	3.7199	4.94736	2.04684	139	3' UTR	1	58505674	58505780	107	2	Gm23966	rna-XR_004936694.1	2807
chr1	58544014	58544212	199	*	A_WT_peak_326	46	4.67573	8.15977	4.6835	76	5' UTR	1	58501933	58544234	42302	2	Orc2	rna-XM_011238453.4	22
chr1	58603488	58603748	261	*	A_WT_peak_327	25	4.18679	5.67954	2.5952	19	Intron (rna-NM_001310599.1/gene-Fam126b, intron 2 of 11)	1	58561965	58625313	63349	2	Fam126b	rna-NM_001310599.1	21565
chr1	58841706	58841940	235	*	A_WT_peak_328	38	4.98563	7.18328	3.83141	80	5' UTR	1	58841661	58886662	45002	1	Casp8	rna-NM_001277926.1	45
chr1	59012307	59012510	204	*	A_WT_peak_329	19	3.54112	4.87467	1.99187	91	5' UTR	1	58939609	59012641	73033	2	Trak2	rna-NM_172406.3	131
chr1	59012726	59013528	803	*	A_WT_peak_330	54	5.13767	8.97911	5.40541	126	Promoter (<=1kb)	1	58939608	59013472	73865	2	Trak2	rna-XM_036153623.1	0
chr1	59019483	59019690	208	*	A_WT_peak_331	22	4.07915	5.29532	2.28939	170	Intron (rna-NM_172656.6/gene-Stradb, intron 3 of 11)	1	58939629	59013509	73881	2	Trak2	rna-XM_036153641.1	-5974
chr1	59131943	59132151	209	*	A_WT_peak_332	13	3.18882	3.91994	1.34761	146	Intron (rna-NM_026600.1/gene-C2cd6, intron 1 of 18)	1	59036275	59134052	97778	2	C2cd6	rna-NM_026600.1	1901
chr1	59133644	59133856	213	*	A_WT_peak_333	24	3.77672	5.49236	2.44581	182	Exon (rna-NM_026600.1/gene-C2cd6, exon 1 of 19)	1	59036275	59134052	97778	2	C2cd6	rna-NM_026600.1	196
chr1	59158912	59159344	433	*	A_WT_peak_334	34	4.16814	6.67372	3.4032	43	Promoter (<=1kb)	1	59139743	59158965	19223	2	Tmem237	rna-NM_001037812.3	0
chr1	59217585	59217741	157	*	A_WT_peak_335	67	6.04047	10.518	6.78715	90	Exon (rna-NM_001159948.2/gene-Als2, exon 25 of 34)	1	59160094	59202548	42455	2	Mpp4	rna-NM_001164682.1	-15037
chr1	59247956	59248113	158	*	A_WT_peak_336	46	5.00234	8.09719	4.6286	22	Exon (rna-NM_001159948.2/gene-Als2, exon 6 of 34)	1	59201915	59276252	74338	2	Als2	rna-NM_001159948.2	28139
chr1	59276085	59276589	505	*	A_WT_peak_337	75	5.30413	11.3984	7.5859	273	Promoter (<=1kb)	1	59201915	59276252	74338	2	Als2	rna-NM_001159948.2	0
chr1	59317123	59317278	156	*	A_WT_peak_338	14	3.28998	4.07734	1.45565	14	Intron (rna-XM_006496049.5/gene-Cdk15, intron 4 of 13)	1	59324938	59391514	66577	1	Cdk15	rna-XM_011238531.3	-7660
chr1	59441604	59441775	172	*	A_WT_peak_339	38	4.1411	7.17429	3.82948	43	Intron (rna-XR_865453.1/gene-Gm33724, intron 2 of 2)	1	59432405	59458086	25682	2	Gm33724	rna-XR_865453.1	16311
chr1	59498122	59498277	156	*	A_WT_peak_340	24	4.04001	5.4501	2.41184	37	Promoter (<=1kb)	1	59494484	59497827	3344	2	Gm33774	rna-XR_373430.2	-295
chr1	59521158	59521376	219	*	A_WT_peak_341	29	3.46025	6.07308	2.91365	11	Promoter (<=1kb)	1	59521306	59526114	4809	1	Fzd7	rna-NM_008057.3	0
chr1	59662636	59662949	314	*	A_WT_peak_342	19	3.76811	4.816	1.94761	19	Intron (rna-NM_001013771.2/gene-Gm973, intron 13 of 19)	1	59650902	59659071	8170	2	Gm33833	rna-XR_373431.4	-3565
chr1	59709875	59710263	389	*	A_WT_peak_343	45	4.57037	7.96899	4.51565	67	Promoter (<=1kb)	1	59678593	59709993	31401	2	Sumo1	rna-NM_009460.2	0
chr1	59724173	59724335	163	*	A_WT_peak_344	44	4.51944	7.87622	4.43366	75	5' UTR	1	59724165	59750669	26505	1	Nop58	rna-NM_018868.2	8
chr1	59778694	59778983	290	*	A_WT_peak_345	50	5.26971	8.5401	5.01499	137	Distal Intergenic	1	59802721	59916775	114055	1	Bmpr2	rna-XM_006495633.3	-23738
chr1	59802229	59802642	414	*	A_WT_peak_346	95	6.00327	13.5961	9.59919	216	Promoter (<=1kb)	1	59802721	59916775	114055	1	Bmpr2	rna-XM_006495633.3	-79
chr1	59888802	59889111	310	*	A_WT_peak_347	48	5.33706	8.329	4.8289	24	Intron (rna-XM_006495633.3/gene-Bmpr2, intron 7 of 12)	1	59952165	60024507	72343	1	Fam117b	rna-NM_001037725.3	-63054
chr1	59951737	59952104	368	*	A_WT_peak_348	49	4.52927	8.50425	4.98364	200	Promoter (<=1kb)	1	59952165	60024507	72343	1	Fam117b	rna-NM_001037725.3	-61
chr1	59952675	59953097	423	*	A_WT_peak_349	73	5.36941	11.1664	7.37515	181	Exon (rna-NM_001037725.3/gene-Fam117b, exon 1 of 8)	1	59952165	60024507	72343	1	Fam117b	rna-NM_001037725.3	510
chr1	59965338	59966101	764	*	A_WT_peak_350	67	5.76548	10.4227	6.70065	455	Intron (rna-NM_001037725.3/gene-Fam117b, intron 1 of 7)	1	59952165	60024507	72343	1	Fam117b	rna-NM_001037725.3	13173
chr1	60046410	60046773	364	*	A_WT_peak_351	37	4.54259	7.03239	3.70856	357	Intron (rna-XM_036153607.1/gene-Ica1l, intron 7 of 9)	1	60028227	60057898	29672	2	Ica1l	rna-XM_006496272.3	11125
chr1	60137050	60137724	675	*	A_WT_peak_352	110	6.34088	15.1226	11.0084	386	Promoter (<=1kb)	1	60137380	60193112	55733	1	Carf	rna-XM_006495975.2	0
chr1	60157047	60157224	178	*	A_WT_peak_353	19	3.73114	4.75906	1.90534	70	Intron (rna-XM_006495975.2/gene-Carf, intron 4 of 15)	1	60156365	60156897	533	1	Gm15464	gene-Gm15464	682
chr1	60173904	60174064	161	*	A_WT_peak_354	21	3.97836	5.13985	2.19193	119	Intron (rna-XM_006495975.2/gene-Carf, intron 8 of 15)	1	60156365	60156897	533	1	Gm15464	gene-Gm15464	17539
chr1	60179484	60179672	189	*	A_WT_peak_355	22	4.0779	5.29339	2.28939	78	Intron (rna-XM_006495975.2/gene-Carf, intron 10 of 15)	1	60156365	60156897	533	1	Gm15464	gene-Gm15464	23119
chr1	60203808	60204131	324	*	A_WT_peak_356	36	4.3309	6.9575	3.64441	93	Distal Intergenic	1	60217910	60377487	159578	1	Nbeal1	rna-XM_006496030.5	-13779
chr1	60219391	60220069	679	*	A_WT_peak_357	149	7.25327	19.323	14.9155	198	Promoter (<=1kb)	1	60219499	60377487	157989	1	Nbeal1	rna-XM_006496035.4	0
chr1	60382116	60382609	494	*	A_WT_peak_358	101	7.00954	14.231	10.1844	398	Promoter (<=1kb)	1	60382459	60427219	44761	1	Cyp20a1	rna-NM_001313721.1	0
chr1	60382763	60382973	211	*	A_WT_peak_359	49	5.02003	8.44643	4.93304	33	Intron (rna-NM_001313721.1/gene-Cyp20a1, intron 1 of 11)	1	60382485	60427217	44733	1	Cyp20a1	rna-XM_006496328.4	278
chr1	60424792	60425132	341	*	A_WT_peak_360	57	5.804	9.41278	5.79127	227	Intron (rna-NM_001313721.1/gene-Cyp20a1, intron 10 of 11)	1	60444927	60519893	74967	1	Abi2	rna-XM_006496076.5	-19795
chr1	60441401	60441588	188	*	A_WT_peak_361	31	4.33661	6.41784	3.18769	44	Distal Intergenic	1	60444927	60519893	74967	1	Abi2	rna-XM_006496076.5	-3339
chr1	60448143	60448595	453	*	A_WT_peak_362	48	4.76359	8.31768	4.81874	129	Promoter (<=1kb)	1	60448466	60521104	72639	1	Abi2	rna-XM_030255016.1	0
chr1	60449056	60449207	152	*	A_WT_peak_363	17	3.32178	4.51108	1.72115	93	Exon (rna-XM_006496076.5/gene-Abi2, exon 1 of 11)	1	60448778	60520322	71545	1	Abi2	rna-NM_198127.2	278
chr1	60605479	60606006	528	*	A_WT_peak_364	28	3.94453	6.02267	2.87268	4	Promoter (<=1kb)	1	60522344	60605924	83581	2	Raph1	rna-NM_001045513.3	0
chr1	60793079	60793303	225	*	A_WT_peak_365	22	4.07915	5.29532	2.28939	195	Intron (rna-NM_007642.4/gene-Cd28, intron 1 of 3)	1	60789155	60812521	23367	1	Cd28	rna-XM_036156388.1	3924
chr1	61217940	61218195	256	*	A_WT_peak_366	35	4.76278	6.83176	3.53688	176	Distal Intergenic	1	61114798	61115416	619	1	Rpl17-ps1	gene-Rpl17-ps1	103142
chr1	61351774	61351929	156	*	A_WT_peak_367	13	3.34943	3.99682	1.39931	51	Intron (rna-XR_865473.1/gene-LOC105243939, intron 1 of 3)	1	61351280	61394716	43437	1	LOC105243939	rna-XR_865472.3	494
chr1	61678716	61679114	399	*	A_WT_peak_368	28	4.24124	6.006	2.85951	51	Intron (rna-XM_011238602.4/gene-Pard3b, intron 1 of 19)	1	61677983	62681443	1003461	1	Pard3b	rna-NM_001081050.2	733
chr1	61824964	61825127	164	*	A_WT_peak_369	22	4.07915	5.29532	2.28939	4	Intron (rna-XM_011238602.4/gene-Pard3b, intron 2 of 19)	1	61807159	62681443	874285	1	Pard3b	rna-XM_006496299.5	17805
chr1	62745603	62745881	279	*	A_WT_peak_370	32	4.51597	6.44194	3.20718	239	Intron (rna-NM_001077406.1/gene-Nrp2, intron 1 of 15)	1	62742476	62857851	115376	1	Nrp2	rna-NM_010939.2	3127
chr1	62782536	62782719	184	*	A_WT_peak_371	27	4.19026	5.92474	2.79351	150	Intron (rna-NM_001077406.1/gene-Nrp2, intron 3 of 15)	1	62750834	62757346	6513	2	Gm29083	rna-XR_865478.2	-25190
chr1	62835497	62835686	190	*	A_WT_peak_372	27	4.15282	5.86499	2.74414	115	Promoter (1-2kb)	1	62830077	62833891	3815	2	4930487H11Rik	rna-NR_040601.1	-1606
chr1	62846401	62846596	196	*	A_WT_peak_373	19	3.75571	4.7969	1.93327	190	Intron (rna-NM_001077403.1/gene-Nrp2, intron 15 of 16)	1	62830077	62833891	3815	2	4930487H11Rik	rna-NR_040601.1	-12510
chr1	63152960	63153114	155	*	A_WT_peak_374	16	3.1314	4.38043	1.65115	92	Promoter (<=1kb)	1	63086960	63152894	65935	2	Ino80d	rna-XM_030253691.2	-66
chr1	63201078	63201286	209	*	A_WT_peak_375	18	3.69489	4.70322	1.86312	72	Intron (rna-XM_036164413.1/gene-Ndufs1, intron 10 of 20)	1	63182751	63215621	32871	2	Ndufs1	rna-XM_036164413.1	14335
chr1	63302693	63303023	331	*	A_WT_peak_376	32	4.20632	6.46934	3.23047	124	5' UTR	1	63305628	63311966	6339	2	Gm11608	rna-XR_373454.3	8943
chr1	63312214	63312556	343	*	A_WT_peak_377	20	3.76408	5.01702	2.0988	114	Promoter (<=1kb)	1	63305628	63312332	6705	2	Gm11608	rna-XR_373455.4	0
chr1	64160726	64161584	859	*	A_WT_peak_378	122	6.35153	16.4278	12.2192	122	Promoter (<=1kb)	1	64160758	64281372	120615	1	Gm35880	rna-XR_373464.5	0
chr1	64360636	64360988	353	*	A_WT_peak_379	21	3.97836	5.13985	2.19193	119	Distal Intergenic	1	64318510	64337696	19187	1	Gm35803	rna-XR_373463.1	42126
chr1	64391476	64391631	156	*	A_WT_peak_380	22	4.07915	5.29532	2.28939	2	Distal Intergenic	1	64318510	64337696	19187	1	Gm35803	rna-XR_373463.1	72966
chr1	64484094	64484276	183	*	A_WT_peak_381	20	3.8573	4.95335	2.05037	94	Promoter (2-3kb)	1	64449192	64481202	32011	2	LOC118567747	rna-XR_004936137.1	-2892
chr1	64571437	64572089	653	*	A_WT_peak_382	77	5.59513	11.6096	7.77733	536	Promoter (<=1kb)	1	64571963	64643707	71745	1	Creb1	rna-NM_001037726.1	0
chr1	64692839	64693083	245	*	A_WT_peak_383	19	3.63457	4.81252	1.94558	5	Exon (rna-XR_001778943.3/gene-Gm29152, exon 4 of 4)	1	64689022	64693169	4148	1	Gm29152	rna-XR_004936144.1	3817
chr1	64696417	64696607	191	*	A_WT_peak_384	20	3.69819	4.9131	2.02044	177	Distal Intergenic	1	64689022	64693169	4148	1	Gm29152	rna-XR_004936144.1	7395
chr1	64729602	64730030	429	*	A_WT_peak_385	61	4.8776	9.83551	6.17104	212	Promoter (<=1kb)	1	64719028	64729818	10791	2	2810408I11Rik	rna-NR_038009.1	0
chr1	64776614	64777153	540	*	A_WT_peak_386	151	6.41132	19.6068	15.1816	349	Promoter (<=1kb)	1	64769717	64776909	7193	2	Fzd5	rna-NM_001042659.1	0
chr1	64887144	64887396	253	*	A_WT_peak_387	20	3.69819	4.9131	2.02044	89	Intron (rna-XM_006495983.5/gene-Plekhm3, intron 5 of 6)	1	64926013	64935887	9875	1	Gm51628	rna-XR_003947840.1	-38617
chr1	64995967	64996353	387	*	A_WT_peak_388	25	4.1322	5.59425	2.52676	103	Promoter (<=1kb)	1	64828280	64995976	167697	2	Plekhm3	rna-XM_006495982.3	0
chr1	65056585	65056786	202	*	A_WT_peak_389	23	4.01442	5.41005	2.37998	195	Intron (rna-NM_001310617.1/gene-Akr1cl, intron 5 of 8)	1	65067124	65068134	1011	1	Gm8550	gene-Gm8550	-10338
chr1	65074819	65074987	169	*	A_WT_peak_390	20	3.87038	4.9735	2.0662	8	Promoter (2-3kb)	1	65052237	65071918	19682	2	Akr1cl	rna-NM_027582.4	-2901
chr1	65163823	65164100	278	*	A_WT_peak_391	16	3.62591	4.41615	1.65115	120	Promoter (1-2kb)	1	65144443	65162509	18067	2	D630023F18Rik	rna-XR_003947354.2	-1314
chr1	65217328	65218492	1165	*	A_WT_peak_392	66	5.12406	10.3254	6.61241	354	Promoter (<=1kb)	1	65197775	65218301	20527	2	Idh1	rna-NM_010497.3	0
chr1	65225365	65226074	710	*	A_WT_peak_393	284	10.5282	33.6712	28.446	372	Promoter (<=1kb)	1	65197775	65225638	27864	2	Idh1	rna-NM_001111320.1	0
chr1	65316987	65317312	326	*	A_WT_peak_394	61	6.0825	9.86345	6.19587	59	Promoter (<=1kb)	1	65317921	65428784	110864	1	Pth2r	rna-XM_011238473.2	-609
chr1	66739854	66740021	168	*	A_WT_peak_395	83	6.59899	12.2411	8.35463	124	Promoter (<=1kb)	1	66739957	66758669	18713	1	Rpe	rna-XM_030242120.2	0
chr1	66855987	66856853	867	*	A_WT_peak_396	66	4.98715	10.3959	6.67615	236	Promoter (<=1kb)	1	66758402	66856754	98353	2	Kansl1l	rna-NM_001122738.1	0
chr1	66885593	66885787	195	*	A_WT_peak_397	37	4.74221	7.07326	3.74268	32	Intron (rna-NM_007381.4/gene-Acadl, intron 5 of 10)	1	66888217	66888847	631	2	Gm15793	rna-XM_036155727.1	3060
chr1	66906794	66907127	334	*	A_WT_peak_398	24	3.74879	5.44537	2.40877	108	Distal Intergenic	1	66905956	66906085	130	1	Gm25832	rna-XR_004936804.1	838
chr1	69816292	69816523	232	*	A_WT_peak_399	22	4.07915	5.29532	2.28939	15	Intron (rna-XR_373478.2/gene-Gm29822, intron 2 of 2)	1	69810278	69826748	16471	2	Gm29822	rna-XR_373478.2	10225
chr1	70445311	70445720	410	*	A_WT_peak_400	53	5.70671	8.92305	5.35563	176	Intron (rna-NM_029160.3/gene-Spag16, intron 14 of 16)	1	70635974	70636080	107	1	Gm23422	rna-XR_004936701.1	-190254
chr1	71141874	71142367	494	*	A_WT_peak_401	181	9.21304	22.7692	18.1501	342	Promoter (<=1kb)	1	71066690	71142300	75611	2	Bard1	rna-XM_006495631.5	0
chr1	71596124	71596557	434	*	A_WT_peak_402	63	5.74937	10.029	6.34515	269	Promoter (<=1kb)	1	71596315	71618562	22248	1	Atic	rna-NM_026195.3	0
chr1	71692150	71692504	355	*	A_WT_peak_403	53	5.3147	8.94632	5.37659	224	Promoter (<=1kb)	1	71692494	71702002	9509	1	Apol7d	rna-NR_040308.1	0
chr1	72225342	72225515	174	*	A_WT_peak_404	36	4.6838	6.97943	3.66321	13	Intron (rna-XM_006496111.2/gene-Mreg, intron 3 of 5)	1	72198392	72237440	39049	2	Mreg	rna-XM_006496111.2	11925
chr1	72264902	72265125	224	*	A_WT_peak_405	22	3.47828	5.20469	2.24139	53	Promoter (<=1kb)	1	72265399	72265589	191	1	Gm25360	rna-XR_004936868.1	-274
chr1	72275585	72275849	265	*	A_WT_peak_406	18	3.41117	4.65991	1.83154	240	Promoter (<=1kb)	1	72276105	72276295	191	1	Gm23472	rna-XR_004936858.1	-256
chr1	72283095	72283371	277	*	A_WT_peak_407	30	3.91094	6.21794	3.02288	257	Promoter (<=1kb)	1	72283152	72314028	30877	1	D230017M19Rik	rna-NR_155355.1	0
chr1	72293918	72294079	162	*	A_WT_peak_408	22	3.48563	5.21786	2.25196	69	Promoter (<=1kb)	1	72294167	72294357	191	1	Gm25939	rna-XR_004936872.1	-88
chr1	72296113	72296335	223	*	A_WT_peak_409	34	4.07358	6.77518	3.48916	32	Intron (rna-NR_155355.1/gene-D230017M19Rik, intron 1 of 3)	1	72294167	72294357	191	1	Gm25939	rna-XR_004936872.1	1946
chr1	72323344	72323528	185	*	A_WT_peak_410	90	6.31151	12.967	9.01952	112	Promoter (<=1kb)	1	72298331	72323480	25150	2	Pecr	rna-NM_001356516.1	0
chr1	72346464	72346620	157	*	A_WT_peak_411	105	7.50588	14.6472	10.5685	49	Promoter (<=1kb)	1	72346576	72434101	87526	1	Xrcc5	rna-XM_006495893.4	0
chr1	72402470	72402638	169	*	A_WT_peak_412	31	4.50139	6.41887	3.18833	84	Intron (rna-XM_006495893.4/gene-Xrcc5, intron 16 of 21)	1	72452025	72460422	8398	1	Gm39661	rna-XR_865525.2	-49387
chr1	72552996	72553281	286	*	A_WT_peak_413	22	3.80181	5.3004	2.2927	115	Intron (rna-XM_006496112.4/gene-Marchf4, intron 1 of 4)	1	72466271	72575518	109248	2	Marchf4	rna-XM_006496112.4	22237
chr1	72573666	72573862	197	*	A_WT_peak_414	18	3.68296	4.68484	1.84941	136	Exon (rna-XM_006496112.4/gene-Marchf4, exon 1 of 5)	1	72466271	72575518	109248	2	Marchf4	rna-XM_006496112.4	1656
chr1	72622193	72622399	207	*	A_WT_peak_415	65	5.29603	10.3041	6.59308	145	Promoter (<=1kb)	1	72622366	72668517	46152	1	Smarcal1	rna-XM_011238557.4	0
chr1	73038846	73039007	162	*	A_WT_peak_416	43	5.19576	7.79778	4.36555	118	Intron (rna-XR_373508.3/gene-Gm31137, intron 1 of 2)	1	73024007	73045187	21181	1	Gm31137	rna-XR_373508.3	14839
chr1	73091196	73091358	163	*	A_WT_peak_417	32	4.54542	6.4885	3.24672	51	Distal Intergenic	1	73063745	73064667	923	1	1700027A15Rik	rna-NR_038002.1	27451
chr1	73302771	73302977	207	*	A_WT_peak_418	43	5.17808	7.76962	4.34017	48	Intron (rna-XR_865539.4/gene-Gm29185, intron 1 of 4)	1	73403065	73411204	8140	1	Gm31344	rna-NR_168702.1	-100088
chr1	73670522	73670718	197	*	A_WT_peak_419	30	4.53239	6.21905	3.02288	133	Intron (rna-NR_045311.1/gene-6030407O03Rik, intron 7 of 8)	1	73559435	73569124	9690	2	C530043A13Rik	rna-XR_373514.3	-101398
chr1	73865646	73865872	227	*	A_WT_peak_420	24	3.75805	5.46097	2.42072	12	Exon (rna-XR_001778996.1/gene-Gm29183, exon 1 of 6)	1	73789384	73866240	76857	2	Gm29183	rna-XR_001778996.1	368
chr1	73902038	73902191	154	*	A_WT_peak_421	56	5.89211	9.22019	5.61837	92	Exon (rna-NR_045311.1/gene-6030407O03Rik, exon 2 of 9)	1	73657540	73903625	246086	2	6030407O03Rik	rna-NR_045311.1	1434
chr1	74007733	74008039	307	*	A_WT_peak_422	32	3.91425	6.48126	3.24054	104	Intron (rna-XM_006495882.4/gene-Tns1, intron 13 of 31)	1	73949391	74002208	52818	2	Tns1	rna-XM_036163624.1	-5525
chr1	74027862	74028056	195	*	A_WT_peak_423	19	3.25177	4.79509	1.933	154	Intron (rna-XM_006495882.4/gene-Tns1, intron 7 of 31)	1	73949391	74037678	88288	2	Tns1	rna-XM_006495882.4	9622
chr1	74029634	74029792	159	*	A_WT_peak_424	28	3.67944	6.04002	2.887	126	Intron (rna-XM_006495882.4/gene-Tns1, intron 6 of 31)	1	73949391	74037678	88288	2	Tns1	rna-XM_006495882.4	7886
chr1	74123173	74123501	329	*	A_WT_peak_425	21	3.31855	5.12772	2.18298	35	Intron (rna-XM_006495872.1/gene-Tns1, intron 1 of 36)	1	73949391	74130505	181115	2	Tns1	rna-XM_006495872.1	7004
chr1	74161886	74162121	236	*	A_WT_peak_426	48	4.6366	8.39919	4.8911	149	Intron (rna-XM_006495871.4/gene-Tns1, intron 1 of 36)	1	73949391	74163689	214299	2	Tns1	rna-XM_006495871.4	1568
chr1	74197702	74197861	160	*	A_WT_peak_427	19	3.50551	4.816	1.94761	150	Exon (rna-NM_009909.3/gene-Cxcr2, exon 2 of 2)	1	74194808	74200404	5597	1	Cxcr2	rna-XM_006495638.5	2894
chr1	74230420	74230745	326	*	A_WT_peak_428	50	4.75949	8.62757	5.09257	136	Distal Intergenic	1	74230944	74232003	1060	2	Cxcr1	rna-XM_006495956.1	1258
chr1	74238400	74238598	199	*	A_WT_peak_429	42	4.89331	7.60944	4.20089	153	Distal Intergenic	1	74230962	74233867	2906	2	Cxcr1	rna-XM_030253700.2	-4533
chr1	74275288	74275546	259	*	A_WT_peak_430	29	3.85152	6.11126	2.94523	24	Promoter (<=1kb)	1	74275656	74307368	31713	1	Arpc2	rna-XM_030243491.2	-110
chr1	74323814	74324422	609	*	A_WT_peak_431	219	6.72276	26.7848	21.9332	174	Promoter (<=1kb)	1	74318999	74323897	4899	2	Aamp	rna-NM_001190444.1	0
chr1	74334564	74334799	236	*	A_WT_peak_432	21	3.0881	5.07549	2.14357	223	5' UTR	1	74327406	74343495	16090	2	Tmbim1	rna-NM_027154.5	8696
chr1	74342904	74343315	412	*	A_WT_peak_433	20	3.33739	4.95095	2.04931	171	5' UTR	1	74327406	74343495	16090	2	Tmbim1	rna-NM_027154.5	180
chr1	74371316	74372088	773	*	A_WT_peak_434	48	4.05314	8.3864	4.87943	486	Promoter (<=1kb)	1	74371769	74392851	21083	1	Pnkd	rna-NM_019999.2	0
chr1	74389697	74389865	169	*	A_WT_peak_435	40	4.01164	7.46969	4.07998	133	Exon (rna-XM_006496167.4/gene-Pnkd, exon 8 of 10)	1	74401272	74408482	7211	1	Catip	rna-XM_011238521.1	-11407
chr1	74425956	74426271	316	*	A_WT_peak_436	43	3.78783	7.77621	4.34633	121	3' UTR	1	74430274	74436153	5880	1	Ctdsp1	rna-XM_036164466.1	-4003
chr1	74436548	74436985	438	*	A_WT_peak_437	47	3.98637	8.23467	4.74603	89	Exon (rna-XR_004936176.1/gene-LOC118567753, exon 1 of 3)	1	74432585	74437570	4986	2	LOC118567753	rna-XR_004936176.1	585
chr1	74466031	74466196	166	*	A_WT_peak_438	32	3.75749	6.43695	3.20364	24	Intron (rna-NM_009509.2/gene-Vil1, intron 14 of 19)	1	74448543	74474719	26177	1	Vil1	rna-NM_009509.2	17488
chr1	74544702	74545769	1068	*	A_WT_peak_439	297	9.17061	35.0891	29.7954	380	Promoter (<=1kb)	1	74545192	74570001	24810	1	Cnot9	rna-XM_006496171.4	0
chr1	74626989	74627696	708	*	A_WT_peak_440	242	7.67989	29.2619	24.2679	306	Promoter (<=1kb)	1	74627448	74631602	4155	1	Bcs1l	rna-NM_001305652.1	0
chr1	74700662	74701179	518	*	A_WT_peak_441	74	6.25045	11.2515	7.45281	247	Promoter (<=1kb)	1	74700804	74740991	40188	1	Ttll4	rna-XM_006496224.3	0
chr1	74718973	74719143	171	*	A_WT_peak_442	25	4.03271	5.67274	2.58956	10	Exon (rna-XM_006496224.3/gene-Ttll4, exon 3 of 20)	1	74700861	74740991	40131	1	Ttll4	rna-NM_001014974.2	18112
chr1	74752633	74753164	532	*	A_WT_peak_443	53	5.09892	8.91136	5.34532	308	Promoter (<=1kb)	1	74752694	74777056	24363	1	Cyp27a1	rna-NM_024264.5	0
chr1	74786574	74786802	229	*	A_WT_peak_444	25	3.69676	5.59191	2.52526	64	Exon (rna-XM_006495989.5/gene-Prkag3, exon 5 of 15)	1	74778081	74788114	10034	2	Prkag3	rna-NM_153744.3	1312
chr1	74884067	74884239	173	*	A_WT_peak_445	16	3.62591	4.41615	1.65115	2	Promoter (1-2kb)	1	74856237	74882691	26455	2	Gm32275	rna-XR_373533.4	-1376
chr1	75053573	75053838	266	*	A_WT_peak_446	36	4.84554	6.9623	3.64849	63	Intron (rna-NM_029342.4/gene-Nhej1, intron 5 of 7)	1	75006505	75101870	95366	2	Nhej1	rna-NM_029342.4	48032
chr1	75081129	75081440	312	*	A_WT_peak_447	23	3.86504	5.40276	2.37425	113	Intron (rna-NM_029342.4/gene-Nhej1, intron 5 of 7)	1	75006505	75101870	95366	2	Nhej1	rna-NM_029342.4	20430
chr1	75101309	75101896	588	*	A_WT_peak_448	117	6.32936	15.9505	11.7773	258	Promoter (<=1kb)	1	75006505	75101870	95366	2	Nhej1	rna-NM_029342.4	0
chr1	75117676	75117905	230	*	A_WT_peak_449	43	4.02235	7.76548	4.33707	55	Intron (rna-NM_001356264.1/gene-Cnppd1, intron 1 of 7)	1	75112406	75118335	5930	2	Cnppd1	rna-NM_001356264.1	430
chr1	75145103	75145763	661	*	A_WT_peak_450	97	5.54915	13.7968	9.78331	574	Promoter (<=1kb)	1	75145290	75148270	2981	1	Zfand2b	rna-NM_001159905.1	0
chr1	75156921	75157193	273	*	A_WT_peak_451	53	4.15133	8.89385	5.32955	175	Promoter (<=1kb)	1	75148284	75157036	8753	2	Abcb6	rna-NM_023732.3	0
chr1	75168104	75168277	174	*	A_WT_peak_452	51	4.08445	8.73864	5.19066	38	5' UTR	1	75157509	75168377	10869	2	Atg9a	rna-XM_011238688.4	100
chr1	75168485	75168810	326	*	A_WT_peak_453	189	7.43667	23.6199	18.9524	269	Promoter (<=1kb)	1	75168801	75176031	7231	1	Ankzf1	rna-XR_004933624.1	0
chr1	75187219	75187700	482	*	A_WT_peak_454	49	4.49359	8.43461	4.92276	103	Promoter (<=1kb)	1	75174178	75187390	13213	2	Glb1l	rna-XM_006496553.5	0
chr1	75213182	75213503	322	*	A_WT_peak_455	27	3.56893	5.82879	2.71523	183	Promoter (<=1kb)	1	75213346	75222336	8991	1	Dnajb2	rna-NM_001159885.1	0
chr1	75235874	75236088	215	*	A_WT_peak_456	41	4.06163	7.57201	4.16918	176	Intron (rna-XM_006496444.2/gene-Ptprn, intron 4 of 22)	1	75223685	75240415	16731	2	Ptprn	rna-NM_001359281.1	4327
chr1	75293880	75294709	830	*	A_WT_peak_457	419	8.59188	47.7445	41.9231	369	Promoter (<=1kb)	1	75285209	75293980	8772	2	Dnpep	rna-XM_006496406.1	0
chr1	75370535	75370729	195	*	A_WT_peak_458	17	3.30603	4.48475	1.70136	189	Intron (rna-NM_007463.4/gene-Speg, intron 6 of 40)	1	75376143	75408912	32770	1	Speg	rna-XM_006496403.5	-5414
chr1	75455836	75456194	359	*	A_WT_peak_459	57	4.21455	9.33129	5.7182	96	Promoter (<=1kb)	1	75451213	75456115	4903	2	Chpf	rna-NM_001001565.2	0
chr1	75486315	75486489	175	*	A_WT_peak_460	22	3.50044	5.24432	2.27277	79	Exon (rna-NM_010564.5/gene-Inha, exon 2 of 2)	1	75484253	75487010	2758	1	Inha	rna-NM_001329843.1	2062
chr1	75498376	75498647	272	*	A_WT_peak_461	28	3.81018	6.0367	2.88458	79	Promoter (<=1kb)	1	75498413	75513579	15167	1	Stk11ip	rna-XM_036153689.1	0
chr1	75510772	75511066	295	*	A_WT_peak_462	26	3.52919	5.75223	2.65402	147	Exon (rna-NM_027886.3/gene-Stk11ip, exon 22 of 25)	1	75517921	75519235	1315	1	Gm15183	gene-Gm15183	-6855
chr1	75565065	75565221	157	*	A_WT_peak_463	33	4.60547	6.58342	3.32671	33	Distal Intergenic	1	75544712	75545311	600	1	Gm15180	gene-Gm15180	20353
chr1	75711535	75711750	216	*	A_WT_peak_464	27	4.30042	5.85694	2.73778	19	Distal Intergenic	1	75613022	75613865	844	1	Gm5257	gene-Gm5257	98513
chr1	75906875	75907076	202	*	A_WT_peak_465	20	3.88356	4.99379	2.08156	161	Distal Intergenic	1	75913369	75942178	28810	1	Gm32622	rna-XR_004936183.1	-6293
chr1	75945192	75945348	157	*	A_WT_peak_466	22	4.07915	5.29532	2.28939	51	Intron (rna-XR_004936181.1/gene-Gm32622, intron 3 of 5)	1	75950616	76017059	66444	1	Gm32622	rna-XR_004936182.1	-5268
chr1	77133616	77133783	168	*	A_WT_peak_467	22	4.07915	5.29532	2.28939	108	Distal Intergenic	1	77042507	77044329	1823	1	Tfdp1-ps	gene-Tfdp1-ps	91109
chr1	77275395	77275585	191	*	A_WT_peak_468	28	4.37463	5.97275	2.83217	29	Distal Intergenic	1	77473368	77473389	22	2	rna-NR_105770.1	rna-Mir6352	197804
chr1	77491762	77491939	178	*	A_WT_peak_469	34	4.5169	6.71036	3.43377	79	Promoter (<=1kb)	1	77343819	77491763	147945	2	Epha4	rna-XM_006496407.4	0
chr1	77513628	77513878	251	*	A_WT_peak_470	30	4.53239	6.21905	3.02288	167	Intron (rna-XR_373555.4/gene-Gm32793, intron 2 of 3)	1	77517601	77536701	19101	1	Gm32793	rna-XR_373557.4	-3723
chr1	78171754	78172144	391	*	A_WT_peak_471	38	4.63197	7.18033	3.83141	168	Exon (rna-NM_001159520.1/gene-Pax3, exon 2 of 9)	1	78077904	78173773	95870	2	Pax3	rna-NM_001159520.1	1629
chr1	78465296	78466010	715	*	A_WT_peak_472	210	9.91808	25.8128	21.0151	238	Promoter (<=1kb)	1	78394595	78465534	70940	2	Farsb	rna-NM_001278075.1	0
chr1	78590128	78590286	159	*	A_WT_peak_473	26	4.20067	5.70121	2.61275	83	Promoter (1-2kb)	1	78572246	78588395	16150	2	5730419F03Rik	rna-XR_882535.2	-1733
chr1	78635398	78635615	218	*	A_WT_peak_474	72	5.32644	11.081	7.29736	40	Promoter (<=1kb)	1	78635542	78685460	49919	1	Acsl3	rna-NM_001033606.2	0
chr1	78653936	78654103	168	*	A_WT_peak_475	24	4.07901	5.51111	2.46042	29	Intron (rna-NM_001033606.2/gene-Acsl3, intron 1 of 14)	1	78657685	78658421	737	2	Gm51635	rna-XR_003947894.1	4318
chr1	78939155	78939343	189	*	A_WT_peak_476	22	4.07915	5.29532	2.28939	23	Intron (rna-NR_151519.1/gene-Gm29536, intron 2 of 3)	1	78944098	78945814	1717	2	Gm5830	gene-Gm5830	6471
chr1	79490364	79490700	337	*	A_WT_peak_477	38	4.98563	7.18328	3.83141	59	Distal Intergenic	1	79491456	79491581	126	2	Gm24160	rna-XR_004936806.1	881
chr1	79738717	79739081	365	*	A_WT_peak_478	40	4.57662	7.37989	4.00226	111	Intron (rna-NM_001111279.1/gene-Wdfy1, intron 1 of 11)	1	79679979	79739486	59508	2	Wdfy1	rna-NM_001111279.1	405
chr1	79760180	79760445	266	*	A_WT_peak_479	23	3.9642	5.3314	2.31795	97	Distal Intergenic	1	79765968	79769466	3499	1	Gm39666	rna-XR_865569.3	-5523
chr1	79789828	79790016	189	*	A_WT_peak_480	15	3.53632	4.28003	1.59645	41	Intron (rna-XM_006496459.5/gene-Serpine2, intron 3 of 8)	1	79765968	79769466	3499	1	Gm39666	rna-XR_865569.3	23860
chr1	80236542	80236724	183	*	A_WT_peak_481	30	4.53239	6.21905	3.02288	89	Distal Intergenic	1	80213993	80226775	12783	1	Gm34098	rna-XR_373579.4	22549
chr1	80309050	80309253	204	*	A_WT_peak_482	22	4.07915	5.29532	2.28939	46	Intron (rna-NM_001313728.1/gene-Cul3, intron 1 of 16)	1	80243327	80300773	57447	2	Cul3	rna-XM_030254438.2	-8277
chr1	80318241	80318961	721	*	A_WT_peak_483	188	8.03742	23.5461	18.8835	361	Promoter (<=1kb)	1	80242640	80318407	75768	2	Cul3	rna-NM_001313728.1	0
chr1	81219073	81219350	278	*	A_WT_peak_484	22	4.07915	5.29532	2.28939	32	Exon (rna-XM_006496485.4/gene-Nyap2, exon 5 of 8)	1	81055124	81319479	264356	1	Nyap2	rna-NM_001356397.1	163949
chr1	82294152	82294668	517	*	A_WT_peak_485	55	5.42077	9.12446	5.53457	375	Promoter (<=1kb)	1	82294178	82364309	70132	1	Rhbdd1	rna-XM_011238714.3	0
chr1	82424763	82424996	234	*	A_WT_peak_486	20	3.76408	5.01702	2.0988	127	Distal Intergenic	1	82334249	82353001	18753	2	Gm46095	rna-XR_003947899.2	-71762
chr1	82564517	82564698	182	*	A_WT_peak_487	29	4.34702	6.1742	2.99698	3	Promoter (<=1kb)	1	82564642	82699780	135139	1	Col4a3	rna-NM_007734.2	0
chr1	82581681	82581965	285	*	A_WT_peak_488	25	4.15931	5.63662	2.56073	196	Intron (rna-NM_007734.2/gene-Col4a3, intron 1 of 51)	1	82564647	82686067	121421	1	Col4a3	rna-XM_036157135.1	17034
chr1	82702558	82702900	343	*	A_WT_peak_489	42	4.93729	7.68122	4.26287	107	Promoter (<=1kb)	1	82702599	82730111	27513	1	Mff	rna-XM_006496556.4	0
chr1	82750285	82750630	346	*	A_WT_peak_490	24	3.93041	5.50825	2.45864	188	Distal Intergenic	1	82734368	82746182	11815	2	Tm4sf20	rna-NM_025453.4	-4103
chr1	82817011	82817191	181	*	A_WT_peak_491	86	5.91127	12.6119	8.69432	47	Promoter (<=1kb)	1	82817181	82878716	61536	1	Agfg1	rna-NM_001347077.1	0
chr1	82817482	82817737	256	*	A_WT_peak_492	28	3.81837	6.0515	2.89665	197	Exon (rna-XR_004940184.1/gene-Agfg1, exon 1 of 14)	1	82817181	82878722	61542	1	Agfg1	rna-NM_010472.3	301
chr1	82890440	82890647	208	*	A_WT_peak_493	19	3.75571	4.7969	1.93327	165	Distal Intergenic	1	82817181	82878722	61542	1	Agfg1	rna-NM_010472.3	73259
chr1	83385803	83385966	164	*	A_WT_peak_494	43	5.21357	7.82613	4.3901	83	Promoter (<=1kb)	1	83233163	83385921	152759	2	Sphkap	rna-NM_001356547.1	0
chr1	83687672	83687885	214	*	A_WT_peak_495	35	4.74657	6.80618	3.51508	155	Distal Intergenic	1	83899639	83899762	124	1	Gm24555	gene-Gm24555	-211754
chr1	83705681	83705866	186	*	A_WT_peak_496	38	4.98563	7.18328	3.83141	60	Distal Intergenic	1	83899639	83899762	124	1	Gm24555	gene-Gm24555	-193773
chr1	83900314	83900486	173	*	A_WT_peak_497	26	4.2571	5.78931	2.68317	142	Distal Intergenic	1	83899639	83899762	124	1	Gm24555	gene-Gm24555	675
chr1	84686098	84686327	230	*	A_WT_peak_498	30	4.53239	6.21905	3.02288	145	Promoter (1-2kb)	1	84687467	84689199	1733	1	Gm51637	rna-XR_003947902.1	-1140
chr1	84703712	84703862	151	*	A_WT_peak_499	29	4.2803	6.06816	2.91019	115	Intron (rna-NM_133975.4/gene-Trip12, intron 38 of 40)	1	84687467	84689199	1733	1	Gm51637	rna-XR_003947902.1	16245
chr1	84817127	84817539	413	*	A_WT_peak_500	37	4.08275	7.06389	3.73512	58	Promoter (<=1kb)	1	84698917	84817144	118228	2	Trip12	rna-XM_036160829.1	0
chr1	84886835	84886998	164	*	A_WT_peak_501	20	3.87038	4.9735	2.0662	155	Intron (rna-XM_006496551.5/gene-Slc16a14, intron 4 of 4)	1	84909861	84913738	3878	1	Gm39669	rna-XR_865590.2	-22863
chr1	84903512	84903717	206	*	A_WT_peak_502	23	3.87578	5.42012	2.38848	169	Intron (rna-XM_006496551.5/gene-Slc16a14, intron 2 of 4)	1	84909861	84913738	3878	1	Gm39669	rna-XR_865590.2	-6144
chr1	85721141	85721320	180	*	A_WT_peak_503	61	5.20026	9.77433	6.11633	125	Promoter (<=1kb)	1	85721148	85779297	58150	1	Cab39	rna-XM_036155674.1	0
chr1	85992003	85992884	882	*	A_WT_peak_504	247	8.41693	29.7439	24.7229	337	Promoter (<=1kb)	1	85992341	86067017	74677	1	Psmd1	rna-NM_027357.2	0
chr1	86082179	86082607	429	*	A_WT_peak_505	38	4.02214	7.21894	3.86215	108	Promoter (<=1kb)	1	86082436	86170337	87902	1	Armc9	rna-XM_011248111.4	0
chr1	86148859	86149171	313	*	A_WT_peak_506	43	4.3292	7.8172	4.38212	97	3' UTR	1	86173939	86184507	10569	2	Gm46098	rna-XR_001779053.2	35336
chr1	86286690	86287592	903	*	A_WT_peak_507	385	9.18191	44.2869	38.5813	545	Promoter (<=1kb)	1	86287306	86296229	8924	1	C130036L24Rik	rna-NR_015507.3	0
chr1	86345503	86345706	204	*	A_WT_peak_508	24	3.52977	5.52356	2.4713	197	Distal Intergenic	1	86354051	86355771	1721	1	Tex44	rna-NM_027966.1	-8345
chr1	86362021	86362289	269	*	A_WT_peak_509	57	3.81651	9.41516	5.79326	52	Intron (rna-XR_387214.2/gene-Gm32700, intron 1 of 1)	1	86357733	86369247	11515	2	Gm32700	rna-XR_387214.2	6958
chr1	86368120	86368420	301	*	A_WT_peak_510	64	3.87454	10.1132	6.42087	230	Intron (rna-XR_387214.2/gene-Gm32700, intron 1 of 1)	1	86357733	86369247	11515	2	Gm32700	rna-XR_387214.2	827
chr1	86391217	86391401	185	*	A_WT_peak_511	27	3.73795	5.90579	2.77787	140	Intron (rna-XR_878334.4/gene-Gm32758, intron 3 of 4)	1	86384374	86392135	7762	2	Gm32758	rna-XR_878334.4	734
chr1	86395262	86395440	179	*	A_WT_peak_512	30	3.52246	6.20355	3.02135	34	Promoter (<=1kb)	1	86392358	86394858	2501	2	Gm41907	rna-XR_878336.3	-404
chr1	86398392	86398933	542	*	A_WT_peak_513	58	4.55999	9.50136	5.87036	438	Intron (rna-XR_878335.3/gene-Gm41907, intron 1 of 2)	1	86392358	86400588	8231	2	Gm41907	rna-XR_878335.3	1655
chr1	86414909	86415371	463	*	A_WT_peak_514	31	3.47412	6.33253	3.11694	241	Distal Intergenic	1	86401284	86401742	459	1	Rpl30-ps6	gene-Rpl30-ps6	13625
chr1	86431213	86431611	399	*	A_WT_peak_515	33	3.15949	6.65751	3.38934	45	Distal Intergenic	1	86454279	86458434	4156	1	Ptma	rna-NM_001360830.1	-22668
chr1	86452857	86453224	368	*	A_WT_peak_516	48	3.22334	8.31414	4.81587	221	Promoter (1-2kb)	1	86454279	86458434	4156	1	Ptma	rna-NM_001360830.1	-1055
chr1	86453637	86454423	787	*	A_WT_peak_517	169	5.32345	21.4811	16.9406	633	Promoter (<=1kb)	1	86454279	86458434	4156	1	Ptma	rna-NM_001360830.1	0
chr1	86471571	86471970	400	*	A_WT_peak_518	28	3.93511	6.00644	2.85958	138	Intron (rna-NM_001360816.1/gene-Pde6d, intron 3 of 3)	1	86454279	86458434	4156	1	Ptma	rna-NR_153834.1	17292
chr1	86510038	86510624	587	*	A_WT_peak_519	244	9.21469	29.5051	24.4963	461	Promoter (<=1kb)	1	86510363	86533986	23624	1	Cops7b	rna-XM_030254496.2	0
chr1	86529099	86529313	215	*	A_WT_peak_520	16	3.20717	4.31884	1.62378	43	Intron (rna-XM_030254496.2/gene-Cops7b, intron 5 of 5)	1	86510644	86533986	23343	1	Cops7b	rna-XM_036165290.1	18455
chr1	86559449	86559626	178	*	A_WT_peak_521	36	4.51768	6.99105	3.67292	89	Intron (rna-XR_878337.2/gene-Gm41908, intron 1 of 2)	1	86554787	86571965	17179	1	Gm41908	rna-XR_878337.2	4662
chr1	86589056	86589387	332	*	A_WT_peak_522	56	5.31262	9.28302	5.67404	180	Distal Intergenic	1	86594015	86598295	4281	2	Nppc	rna-NM_010933.5	8908
chr1	86767606	86767849	244	*	A_WT_peak_523	21	3.93717	5.07638	2.14357	47	Intron (rna-XM_006529298.4/gene-Dis3l2, intron 7 of 20)	1	86762722	86977818	215097	1	Dis3l2	rna-XM_036163095.1	4884
chr1	86985331	86985596	266	*	A_WT_peak_524	26	3.90268	5.70323	2.61398	170	Intron (rna-XR_387217.3/gene-Gm28375, intron 2 of 2)	1	86984227	86995259	11033	2	Gm28375	rna-XR_387217.3	9663
chr1	87008664	87009181	518	*	A_WT_peak_525	56	5.89211	9.22019	5.61837	409	Intron (rna-XR_003947910.1/gene-Gm29371, intron 1 of 3)	1	87007984	87025733	17750	1	Gm29371	rna-XR_003947910.1	680
chr1	87092390	87092551	162	*	A_WT_peak_526	17	3.20395	4.50846	1.71918	74	Intron (rna-XR_003947911.1/gene-Gm33292, intron 3 of 3)	1	87075377	87084807	9431	2	Ecel1	rna-XM_017314898.1	-7583
chr1	87141201	87141697	497	*	A_WT_peak_527	53	4.26757	8.8658	5.30412	342	Promoter (<=1kb)	1	87141633	87160497	18865	1	Eif4e2	rna-XM_006529674.4	0
chr1	87167061	87167281	221	*	A_WT_peak_528	19	3.47061	4.75836	1.90534	85	3' UTR	1	87167238	87174458	7221	2	LOC118567765	rna-XR_004936223.1	7177
chr1	87173845	87174348	504	*	A_WT_peak_529	65	5.48794	10.2988	6.58815	208	Exon (rna-XR_004936223.1/gene-LOC118567765, exon 1 of 2)	1	87167238	87174458	7221	2	LOC118567765	rna-XR_004936223.1	110
chr1	87187124	87187426	303	*	A_WT_peak_530	22	3.66745	5.30798	2.29958	266	Distal Intergenic	1	87192075	87238563	46489	1	Efhd1	rna-NM_028889.3	-4649
chr1	87254561	87255376	816	*	A_WT_peak_531	96	5.65539	13.6505	9.64937	286	Promoter (<=1kb)	1	87254653	87378518	123866	1	Gigyf2	rna-XM_006529466.2	0
chr1	87478595	87478911	317	*	A_WT_peak_532	38	4.43923	7.14458	3.80399	85	Promoter (<=1kb)	1	87478783	87496041	17259	1	Gm46099	rna-XR_001779070.2	0
chr1	87548368	87548537	170	*	A_WT_peak_533	29	4.01176	6.13814	2.96789	136	Intron (rna-NM_001110192.2/gene-Inpp5d, intron 1 of 26)	1	87548039	87648230	100192	1	Inpp5d	rna-XR_003952973.2	329
chr1	87692088	87692356	269	*	A_WT_peak_534	56	5.51511	9.2822	5.67331	118	Intron (rna-XM_036154331.1/gene-Atg16l1, intron 2 of 10)	1	87683733	87720150	36418	1	Atg16l1	rna-NM_029846.4	8355
chr1	87751012	87751251	240	*	A_WT_peak_535	24	3.76736	5.47663	2.43335	134	5' UTR	1	87745241	87772880	27640	1	Sag	rna-XM_036162893.1	5771
chr1	87761742	87762093	352	*	A_WT_peak_536	35	4.29942	6.90287	3.59809	97	Intron (rna-NM_009118.2/gene-Sag, intron 11 of 15)	1	87745241	87772880	27640	1	Sag	rna-XM_036162893.1	16501
chr1	87780732	87780938	207	*	A_WT_peak_537	63	4.64195	9.99675	6.31593	162	Promoter (<=1kb)	1	87780942	87870098	89157	1	Dgkd	rna-XM_006529471.4	-4
chr1	87781409	87781881	473	*	A_WT_peak_538	79	5.17595	11.847	7.99517	144	Exon (rna-NR_136921.1/gene-Gm19582, exon 1 of 2)	1	87781069	87782021	953	2	Gm19582	rna-NR_136921.1	140
chr1	87790059	87790246	188	*	A_WT_peak_539	19	3.67674	4.87921	1.99509	37	Intron (rna-XM_006529471.4/gene-Dgkd, intron 1 of 28)	1	87781069	87782021	953	2	Gm19582	rna-NR_136921.1	-8038
chr1	87828838	87828991	154	*	A_WT_peak_540	22	3.91522	5.25461	2.28009	126	5' UTR	1	87835960	87870098	34139	1	Dgkd	rna-XM_017320352.3	-6969
chr1	87855369	87855564	196	*	A_WT_peak_541	22	3.26272	5.23042	2.26222	16	Exon (rna-XM_006529471.4/gene-Dgkd, exon 17 of 29)	1	87835960	87870098	34139	1	Dgkd	rna-XM_017320352.3	19409
chr1	87935981	87936289	309	*	A_WT_peak_542	42	4.93729	7.68122	4.26287	189	Promoter (<=1kb)	1	87872843	87936273	63431	2	Usp40	rna-NM_001033291.2	0
chr1	87946149	87946329	181	*	A_WT_peak_543	44	5.28604	7.94148	4.49122	105	Distal Intergenic	1	87950003	87951881	1879	1	Gm5832	gene-Gm5832	-3674
chr1	88133349	88133522	174	*	A_WT_peak_544	28	4.11378	6.05295	2.8975	29	Promoter (<=1kb)	1	88132454	88133470	1017	2	Dnajb3	rna-NM_008299.3	0
chr1	88142018	88142461	444	*	A_WT_peak_545	32	3.45165	6.51274	3.26714	77	Intron (rna-NM_201641.2/gene-Ugt1a10, intron 1 of 4)	1	88139681	88147724	8044	1	Ugt1a1	rna-NM_201645.2	2337
chr1	88162906	88163196	291	*	A_WT_peak_546	53	3.22825	8.96847	5.39639	117	Promoter (2-3kb)	1	88165343	88187858	22516	1	Mroh2a	rna-XM_006529045.2	-2147
chr1	88177346	88177771	426	*	A_WT_peak_547	33	2.90101	6.6692	3.39942	44	Exon (rna-XM_006529044.3/gene-Mroh2a, exon 25 of 39)	1	88166207	88187858	21652	1	Mroh2a	rna-XM_006529046.3	11139
chr1	88182796	88183631	836	*	A_WT_peak_548	64	3.29878	10.0973	6.4064	204	Exon (rna-XM_006529044.3/gene-Mroh2a, exon 30 of 39)	1	88166207	88187858	21652	1	Mroh2a	rna-XM_006529046.3	16589
chr1	88184371	88184632	262	*	A_WT_peak_549	41	2.80265	7.55802	4.15657	215	Exon (rna-XM_006529044.3/gene-Mroh2a, exon 34 of 39)	1	88166207	88187858	21652	1	Mroh2a	rna-XM_006529046.3	18164
chr1	88196473	88196881	409	*	A_WT_peak_550	57	3.99236	9.34998	5.73499	87	Intron (rna-NM_198652.2/gene-Hjurp, intron 6 of 7)	1	88186578	88205301	18724	2	Hjurp	rna-NM_198652.2	8420
chr1	88197707	88197928	222	*	A_WT_peak_551	34	3.53784	6.70752	3.43159	52	Exon (rna-NM_198652.2/gene-Hjurp, exon 5 of 8)	1	88186578	88205301	18724	2	Hjurp	rna-NM_198652.2	7373
chr1	88207448	88207598	151	*	A_WT_peak_552	29	3.46581	6.08479	2.92411	90	Promoter (2-3kb)	1	88190835	88205366	14532	2	Hjurp	rna-XM_006529720.4	-2082
chr1	88212187	88212381	195	*	A_WT_peak_553	46	3.62704	8.13489	4.66151	138	Distal Intergenic	1	88190835	88205366	14532	2	Hjurp	rna-XM_006529720.4	-6821
chr1	88219995	88220150	156	*	A_WT_peak_554	25	3.25632	5.63863	2.56222	105	Distal Intergenic	1	88234457	88316573	82117	1	Trpm8	rna-NM_134252.4	-14307
chr1	88236992	88237511	520	*	A_WT_peak_555	37	4.07454	7.04833	3.72194	321	Intron (rna-NM_134252.4/gene-Trpm8, intron 2 of 26)	1	88234458	88316573	82116	1	Trpm8	rna-XM_006529226.2	2534
chr1	88320267	88320440	174	*	A_WT_peak_556	20	3.5683	4.91937	2.02529	141	Distal Intergenic	1	88334688	88356022	21335	1	Spp2	rna-XM_006529918.3	-14248
chr1	88523334	88523651	318	*	A_WT_peak_557	34	4.37379	6.75111	3.46865	75	Distal Intergenic	1	88494428	88497696	3269	2	Gm41912	rna-XR_878356.1	-25638
chr1	88777106	88777259	154	*	A_WT_peak_558	35	4.76278	6.83176	3.53688	12	Distal Intergenic	1	88859966	88861298	1333	1	Gm4753	gene-Gm4753	-82707
chr1	88997720	88998406	687	*	A_WT_peak_559	136	6.65165	17.9825	13.6662	135	Promoter (<=1kb)	1	88998061	89082790	84730	1	Sh3bp4	rna-XM_030243890.2	0
chr1	89040592	89040945	354	*	A_WT_peak_560	37	4.26549	7.12378	3.78619	342	Intron (rna-XM_030243890.2/gene-Sh3bp4, intron 2 of 4)	1	89029993	89031775	1783	2	Gm34331	rna-XR_387242.5	-8817
chr1	89294944	89295168	225	*	A_WT_peak_561	21	3.65243	5.05723	2.1294	55	Intron (rna-NR_040482.1/gene-C030007H22Rik, intron 1 of 2)	1	89315418	89322029	6612	1	Gm41913	rna-XR_878362.1	-20250
chr1	89509383	89509568	186	*	A_WT_peak_562	28	3.96351	6.05532	2.89925	149	Promoter (<=1kb)	1	89482230	89508649	26420	2	Gm41914	rna-XR_003947923.1	-734
chr1	89541607	89541837	231	*	A_WT_peak_563	19	3.40476	4.85856	1.98027	91	Intron (rna-NM_001037136.1/gene-Agap1, intron 3 of 16)	1	89482230	89508649	26420	2	Gm41914	rna-XR_003947923.1	-32958
chr1	89562122	89562283	162	*	A_WT_peak_564	40	4.62432	7.46113	4.07274	109	Intron (rna-NM_001037136.1/gene-Agap1, intron 6 of 16)	1	89604229	89611614	7386	2	4933400F21Rik	rna-NR_015540.1	49331
chr1	89672455	89672820	366	*	A_WT_peak_565	24	3.93041	5.50825	2.45864	335	Intron (rna-NM_001037136.1/gene-Agap1, intron 11 of 16)	1	89604229	89611614	7386	2	4933400F21Rik	rna-NR_015540.1	-60841
chr1	89858973	89859260	288	*	A_WT_peak_566	38	4.4841	7.22166	3.86461	212	Promoter (<=1kb)	1	89855684	89858898	3215	2	Gbx2	rna-NM_010262.3	-75
chr1	89897207	89897411	205	*	A_WT_peak_567	29	4.15877	6.12695	2.95839	186	Promoter (2-3kb)	1	89890242	89894241	4000	2	Gm41915	rna-XR_878372.3	-2966
chr1	89981294	89981475	182	*	A_WT_peak_568	25	3.84352	5.6044	2.53502	12	Intron (rna-NM_029122.2/gene-Iqca, intron 15 of 18)	1	89880313	89942388	62076	2	Asb18	rna-NR_149309.1	-38906
chr1	90052111	90052309	199	*	A_WT_peak_569	45	4.58069	7.98775	4.53187	44	Intron (rna-NM_029122.2/gene-Iqca, intron 6 of 18)	1	89969854	90081123	111270	2	Iqca	rna-NM_029122.2	28814
chr1	90285850	90286018	169	*	A_WT_peak_570	33	4.6361	6.6318	3.36802	124	Intron (rna-XR_878387.3/gene-Gm34992, intron 1 of 4)	1	90265375	90379504	114130	1	Gm34992	rna-XR_878387.3	20475
chr1	90332725	90332998	274	*	A_WT_peak_571	18	3.28704	4.65405	1.82669	269	Intron (rna-XR_878387.3/gene-Gm34992, intron 3 of 4)	1	90265375	90379504	114130	1	Gm34992	rna-XR_878387.3	67350
chr1	90382604	90382791	188	*	A_WT_peak_572	21	3.78657	5.05244	2.12625	183	Intron (rna-XR_878390.3/gene-Gm28722, intron 1 of 1)	1	90381252	90431678	50427	2	Gm28722	rna-XR_878390.3	48887
chr1	90529429	90529599	171	*	A_WT_peak_573	20	3.48271	4.99289	2.08143	145	Promoter (1-2kb)	1	90531147	90541063	9917	1	Cops8	rna-NM_133805.3	-1548
chr1	90530764	90531065	302	*	A_WT_peak_574	33	3.95496	6.55676	3.3046	300	Promoter (<=1kb)	1	90531147	90541063	9917	1	Cops8	rna-NM_133805.3	-82
chr1	90561142	90561323	182	*	A_WT_peak_575	21	3.65243	5.05723	2.1294	110	Distal Intergenic	1	90576800	90581668	4869	1	Gm35242	rna-XR_387260.4	-15477
chr1	90567460	90567720	261	*	A_WT_peak_576	18	3.39456	4.63233	1.81087	35	Distal Intergenic	1	90576800	90581668	4869	1	Gm35242	rna-XR_387260.4	-9080
chr1	90655174	90655445	272	*	A_WT_peak_577	27	4.34464	5.92595	2.79418	237	Distal Intergenic	1	90614567	90631612	17046	2	Gm35332	rna-XR_878399.2	-23562
chr1	90708503	90708679	177	*	A_WT_peak_578	25	4.03271	5.67274	2.58956	172	Intron (rna-NM_001243008.1/gene-Col6a3, intron 36 of 43)	1	90686484	90691736	5253	2	Gm41918	rna-XR_878401.1	-16767
chr1	90980516	90980816	301	*	A_WT_peak_579	49	4.49359	8.43461	4.92276	97	Promoter (<=1kb)	1	90980861	91056666	75806	1	Lrrfip1	rna-XM_006529214.2	-45
chr1	91064935	91065210	276	*	A_WT_peak_580	34	4.5575	6.77596	3.48964	193	Distal Intergenic	1	91072695	91092890	20196	1	Rbm44	rna-XM_006529704.1	-7485
chr1	91072599	91072981	383	*	A_WT_peak_581	87	6.15108	12.6689	8.7466	143	Promoter (<=1kb)	1	91072695	91092890	20196	1	Rbm44	rna-XM_006529704.1	0
chr1	91096087	91096247	161	*	A_WT_peak_582	30	4.20475	6.2024	3.02052	113	Intron (rna-NM_001033408.4/gene-Rbm44, intron 13 of 15)	1	91099010	91099885	876	2	Gm7776	gene-Gm7776	3638
chr1	91167072	91167284	213	*	A_WT_peak_583	19	3.76811	4.816	1.94761	28	Distal Intergenic	1	91177412	91214242	36831	1	Ube2f	rna-XM_017322263.1	-10128
chr1	91177653	91177938	286	*	A_WT_peak_584	173	6.94309	21.8854	17.3197	236	Promoter (<=1kb)	1	91178026	91214243	36218	1	Ube2f	rna-NM_001355761.1	-88
chr1	91179731	91179894	164	*	A_WT_peak_585	41	3.82519	7.60235	4.19536	126	Intron (rna-XM_017322263.1/gene-Ube2f, intron 2 of 9)	1	91178469	91213680	35212	1	Ube2f	rna-XM_030242557.2	1262
chr1	91214702	91215119	418	*	A_WT_peak_586	19	3.37454	4.80626	1.94092	54	Promoter (2-3kb)	1	91218053	91225305	7253	1	Gm7785	gene-Gm7785	-2934
chr1	91222790	91223012	223	*	A_WT_peak_587	22	3.58955	5.17566	2.22015	216	Exon (gene-Gm7785/gene-Gm7785, exon 1 of 1)	1	91226017	91248797	22781	1	Scly	rna-XM_006529744.4	-3005
chr1	91274800	91275021	222	*	A_WT_peak_588	71	4.89368	10.8787	7.114	61	3' UTR	1	91278795	91290126	11332	1	Klhl30	rna-NM_027551.2	-3774
chr1	91296680	91296873	194	*	A_WT_peak_589	15	2.81794	4.15326	1.50712	38	Intron (rna-XM_006529485.5/gene-Erfe, intron 2 of 6)	1	91294152	91301939	7788	1	Erfe	rna-NM_173395.2	2528
chr1	91326094	91326799	706	*	A_WT_peak_590	49	4.65664	8.43659	4.92454	506	Promoter (<=1kb)	1	91301568	91326451	24884	2	Ilkap	rna-XM_030242421.2	0
chr1	91340887	91341154	268	*	A_WT_peak_591	29	3.57849	6.08284	2.92231	159	Promoter (<=1kb)	1	91339205	91340944	1740	2	Hes6	rna-NM_001360899.1	0
chr1	91386843	91387447	605	*	A_WT_peak_592	50	3.79442	8.57068	5.04225	18	Promoter (<=1kb)	1	91343699	91387072	43374	2	Per2	rna-XM_006529249.5	0
chr1	91411734	91411903	170	*	A_WT_peak_593	19	3.61384	4.77971	1.92069	80	Exon (rna-XR_003948697.1/gene-Gm28382, exon 3 of 3)	1	91410546	91412433	1888	1	Gm28382	rna-XR_878403.3	1188
chr1	91422176	91422336	161	*	A_WT_peak_594	46	4.19761	8.13399	4.66064	18	Promoter (<=1kb)	1	91422311	91457029	34719	1	Traf3ip1	rna-XR_004934797.1	0
chr1	91422656	91423375	720	*	A_WT_peak_595	42	3.98244	7.68058	4.26262	673	Intron (rna-XR_004934797.1/gene-Traf3ip1, intron 1 of 18)	1	91422390	91457029	34640	1	Traf3ip1	rna-NM_028718.2	266
chr1	91468075	91468651	577	*	A_WT_peak_596	118	6.18066	16.0424	11.8624	64	Promoter (<=1kb)	1	91468287	91487312	19026	1	Asb1	rna-NM_001039126.2	0
chr1	91647933	91648273	341	*	A_WT_peak_597	29	4.33351	6.15274	2.97975	163	Distal Intergenic	1	91729183	91775756	46574	1	Twist2	rna-NM_007855.3	-80910
chr1	91648857	91649093	237	*	A_WT_peak_598	18	3.64763	4.6304	1.80957	157	Distal Intergenic	1	91729183	91775756	46574	1	Twist2	rna-NM_007855.3	-80090
chr1	91714198	91714348	151	*	A_WT_peak_599	15	3.39776	4.2445	1.57142	61	Distal Intergenic	1	91729183	91775756	46574	1	Twist2	rna-NM_007855.3	-14835
chr1	91746916	91747098	183	*	A_WT_peak_600	19	3.4124	4.87176	1.99058	178	Intron (rna-NM_007855.3/gene-Twist2, intron 1 of 1)	1	91743149	91759044	15896	2	Gm46117	rna-XR_001779204.2	11946
chr1	91979837	91980012	176	*	A_WT_peak_601	17	3.36182	4.57787	1.77009	167	Promoter (2-3kb)	1	91856501	91977801	121301	2	Hdac4	rna-XM_006529311.4	-2036
chr1	92046773	92047069	297	*	A_WT_peak_602	25	3.96393	5.56223	2.50184	19	Intron (rna-XM_036163125.1/gene-Hdac4, intron 1 of 25)	1	91856501	92042362	185862	2	Hdac4	rna-XM_036163131.1	-4411
chr1	92107991	92108560	570	*	A_WT_peak_603	217	7.83407	26.6422	21.7994	69	Promoter (<=1kb)	1	91856501	92108011	251511	2	Hdac4	rna-XM_006529313.2	0
chr1	92138874	92139164	291	*	A_WT_peak_604	32	4.20632	6.46934	3.23047	157	Distal Intergenic	1	91856501	92123424	266924	2	Hdac4	rna-XM_017319488.2	-15450
chr1	92218869	92219135	267	*	A_WT_peak_605	41	4.67303	7.54383	4.14435	147	Distal Intergenic	1	92268385	92271022	2638	2	LOC118567767	rna-XR_004936265.1	51887
chr1	92401141	92401700	560	*	A_WT_peak_606	121	6.97127	16.4064	12.1992	315	Promoter (<=1kb)	1	92367208	92401547	34340	2	Ndufa10	rna-XM_030242321.1	0
chr1	92501305	92501625	321	*	A_WT_peak_607	18	3.53326	4.65185	1.82528	142	Exon (rna-NM_147037.2/gene-Olfr1413, exon 1 of 1)	1	92500847	92501928	1082	1	Olfr1413	rna-NM_147037.2	458
chr1	92515091	92515483	393	*	A_WT_peak_608	35	4.45659	6.88941	3.58604	122	Promoter (<=1kb)	1	92516054	92517019	966	1	Olfr1412	rna-NM_146277.1	-571
chr1	92515726	92515881	156	*	A_WT_peak_609	16	3.39146	4.42572	1.65772	56	Promoter (<=1kb)	1	92516054	92517019	966	1	Olfr1412	rna-NM_146277.1	-173
chr1	92546005	92546165	161	*	A_WT_peak_610	16	3.36445	4.38248	1.65115	108	Promoter (1-2kb)	1	92547603	92548723	1121	1	Olfr12	rna-NM_206896.2	-1438
chr1	92814029	92814189	161	*	A_WT_peak_611	21	3.38538	5.03776	2.11441	42	Intron (rna-XM_017320666.3/gene-Ankmy1, intron 4 of 15)	1	92820508	92820696	189	1	LOC115487694	rna-XR_004936873.1	-6319
chr1	92834503	92834676	174	*	A_WT_peak_612	56	4.43834	9.23941	5.63485	56	Promoter (<=1kb)	1	92834711	92836342	1632	1	Dusp28	rna-NM_175118.3	-35
chr1	92835203	92835447	245	*	A_WT_peak_613	55	4.25911	9.14142	5.54958	43	3' UTR	1	92834711	92836342	1632	1	Dusp28	rna-NM_175118.3	492
chr1	92862156	92862409	254	*	A_WT_peak_614	78	5.64257	11.7017	7.86175	145	5' UTR	1	92862130	92875670	13541	1	Capn10	rna-NM_011796.2	26
chr1	92942147	92942420	274	*	A_WT_peak_615	94	5.92148	13.4288	9.44455	213	Distal Intergenic	1	92934056	92939991	5936	1	Aqp12	rna-NM_177587.2	8091
chr1	92949131	92949319	189	*	A_WT_peak_616	23	3.35483	5.41251	2.38215	2	Intron (rna-NM_001294150.1/gene-Kif1a, intron 42 of 46)	1	92934056	92939991	5936	1	Aqp12	rna-NM_177587.2	15075
chr1	92991220	92991443	224	*	A_WT_peak_617	38	3.86225	7.16059	3.81717	61	Intron (rna-NM_001294150.1/gene-Kif1a, intron 14 of 46)	1	92943177	93010202	67026	2	Kif1a	rna-NM_001294150.1	18759
chr1	93047650	93047853	204	*	A_WT_peak_618	46	4.98828	8.07375	4.60777	139	Distal Intergenic	1	93043004	93043617	614	1	Gm36472	rna-XR_387284.2	4646
chr1	93163278	93163449	172	*	A_WT_peak_619	21	3.44195	5.13959	2.19193	96	Promoter (<=1kb)	1	93163518	93228787	65270	1	Sned1	rna-XM_030252567.1	-69
chr1	93164319	93164655	337	*	A_WT_peak_620	18	3.27289	4.62933	1.80949	334	Intron (rna-XM_030252567.1/gene-Sned1, intron 1 of 30)	1	93163619	93224170	60552	1	Sned1	rna-NM_172463.4	700
chr1	93186901	93187091	191	*	A_WT_peak_621	25	3.60873	5.66942	2.58734	13	Intron (rna-XM_030252567.1/gene-Sned1, intron 3 of 30)	1	93202271	93202332	62	1	Mir6901	rna-NR_105866.1	-15180
chr1	93209395	93209570	176	*	A_WT_peak_622	30	3.90234	6.20253	3.02052	58	Exon (rna-XM_030252567.1/gene-Sned1, exon 19 of 31)	1	93202307	93202326	20	1	rna-NR_105866.1	rna-Mir6901-2	7088
chr1	93223477	93223665	189	*	A_WT_peak_623	14	3.13947	4.01966	1.41516	27	Exon (rna-XM_030252567.1/gene-Sned1, exon 30 of 31)	1	93228927	93233601	4675	2	Mterf4	rna-NM_001310756.1	9936
chr1	93248029	93248216	188	*	A_WT_peak_624	19	3.36707	4.79331	1.93163	59	Exon (rna-NM_080850.2/gene-Pask, exon 11 of 18)	1	93234383	93234996	614	2	Gm7867	gene-Gm7867	-13033
chr1	93270345	93271391	1047	*	A_WT_peak_625	195	7.49211	24.2522	19.5459	873	Promoter (<=1kb)	1	93237159	93270510	33352	2	Pask	rna-NM_080850.2	0
chr1	93278920	93279092	173	*	A_WT_peak_626	43	4.46964	7.78512	4.35391	128	Promoter (<=1kb)	1	93279880	93280007	128	1	Mir6345	rna-NR_105763.1	-788
chr1	93281347	93281561	215	*	A_WT_peak_627	44	4.56009	7.9503	4.49932	103	Intron (rna-NM_023200.3/gene-Ppp1r7, intron 6 of 9)	1	93279913	93279933	21	1	rna-NR_105763.1	rna-Mir6345	1434
chr1	93301604	93301819	216	*	A_WT_peak_628	45	4.13278	7.9985	4.54176	167	Promoter (<=1kb)	1	93301618	93332026	30409	1	Ano7	rna-NM_001271884.1	0
chr1	93373400	93373581	182	*	A_WT_peak_629	14	2.97813	4.10714	1.47585	40	Promoter (<=1kb)	1	93333662	93373423	39762	2	Hdlbp	rna-NM_001301364.1	0
chr1	93405794	93406947	1154	*	A_WT_peak_630	332	8.06386	38.7587	33.2903	300	Promoter (<=1kb)	1	93333662	93406099	72438	2	Hdlbp	rna-NM_001357556.1	0
chr1	93439421	93440219	799	*	A_WT_peak_631	140	6.64138	18.4055	14.0587	171	Promoter (<=1kb)	1	93439826	93549698	109873	1	Farp2	rna-NM_145519.2	0
chr1	93505566	93505736	171	*	A_WT_peak_632	30	4.04127	6.18867	3.00908	47	Intron (rna-NM_145519.2/gene-Farp2, intron 12 of 26)	1	93467527	93482407	14881	1	Gm41920	rna-XR_878410.2	38039
chr1	93527422	93527800	379	*	A_WT_peak_633	40	4.75219	7.37833	4.00094	159	Exon (rna-NM_145519.2/gene-Farp2, exon 14 of 27)	1	93548473	93563449	14977	2	Stk25	rna-NM_021537.3	35649
chr1	93552413	93552576	164	*	A_WT_peak_634	24	3.42123	5.54264	2.48647	32	Intron (rna-NM_021537.3/gene-Stk25, intron 9 of 11)	1	93548473	93563449	14977	2	Stk25	rna-NM_021537.3	10873
chr1	93562900	93563647	748	*	A_WT_peak_635	186	7.1137	23.2708	18.6231	610	Promoter (<=1kb)	1	93548473	93563449	14977	2	Stk25	rna-NM_021537.3	0
chr1	93596625	93596944	320	*	A_WT_peak_636	60	4.82194	9.72333	6.07049	270	Distal Intergenic	1	93549615	93581937	32323	2	Stk25	rna-XM_006529768.3	-14688
chr1	93681953	93682121	169	*	A_WT_peak_637	36	3.91972	7.01525	3.69383	32	Intron (rna-NM_025920.3/gene-Thap4, intron 1 of 5)	1	93633113	93682560	49448	2	Thap4	rna-NM_025920.3	439
chr1	93682721	93683117	397	*	A_WT_peak_638	68	5.08237	10.5903	6.8526	126	Promoter (<=1kb)	1	93682871	93717156	34286	1	Atg4b	rna-XM_036152889.1	0
chr1	93713408	93713598	191	*	A_WT_peak_639	38	4.31388	7.2108	3.85505	165	Intron (rna-NM_001368266.1/gene-Atg4b, intron 9 of 11)	1	93720298	93729656	9359	2	Dtymk	rna-NM_001105667.1	16058
chr1	93731326	93732046	721	*	A_WT_peak_640	146	6.21063	19.0803	14.6891	377	Promoter (<=1kb)	1	93731648	93749823	18176	1	Ing5	rna-XM_006529792.4	0
chr1	93752871	93753202	332	*	A_WT_peak_641	54	4.64265	9.04001	5.45899	123	Promoter (<=1kb)	1	93752937	93781579	28643	1	D2hgdh	rna-XM_006529970.4	0
chr1	93765717	93765967	251	*	A_WT_peak_642	38	4.98563	7.18328	3.83141	90	Exon (rna-XM_036154594.1/gene-D2hgdh, exon 7 of 10)	1	93752986	93780070	27085	1	D2hgdh	rna-XM_036154596.1	12731
chr1	95241278	95241754	477	*	A_WT_peak_643	65	5.89989	10.2826	6.57405	350	Promoter (<=1kb)	1	95241353	95263009	21657	1	Fam174a	rna-NM_026321.4	0
chr1	97589284	97589469	186	*	A_WT_peak_644	26	4.09189	5.76756	2.66575	62	Promoter (<=1kb)	1	97571627	97589401	17775	2	Macir	rna-NM_001355072.1	0
chr1	97629686	97629871	186	*	A_WT_peak_645	35	4.79554	6.88344	3.58169	179	Distal Intergenic	1	97571627	97589743	18117	2	Macir	rna-NM_133825.3	-39943
chr1	97697617	97698320	704	*	A_WT_peak_646	106	7.04645	14.7415	10.6558	142	Promoter (<=1kb)	1	97697894	97720686	22793	1	Gin1	rna-XM_006529614.5	0
chr1	100179744	100179919	176	*	A_WT_peak_647	30	4.53239	6.21905	3.02288	145	Exon (rna-XR_878419.2/gene-Gm41923, exon 1 of 2)	1	100177712	100180214	2503	2	Gm41923	rna-XR_878419.2	295
chr1	105284386	105284850	465	*	A_WT_peak_648	76	6.121	11.4194	7.60494	252	Promoter (<=1kb)	1	105204642	105284435	79794	2	Rnf152	rna-NM_001160368.1	0
chr1	105591196	105591811	616	*	A_WT_peak_649	337	10.7746	39.2321	33.7456	340	Promoter (<=1kb)	1	105446147	105591401	145255	2	Pign	rna-NM_013784.3	0
chr1	105693457	105693668	212	*	A_WT_peak_650	66	5.95184	10.3697	6.65263	192	Distal Intergenic	1	105692004	105692442	439	1	Gm10193	rna-XM_036156026.1	1453
chr1	105718440	105718618	179	*	A_WT_peak_651	23	3.85435	5.38549	2.36033	96	Intron (rna-NM_009399.4/gene-Tnfrsf11a, intron 1 of 9)	1	105708471	105777172	68702	1	Tnfrsf11a	rna-XM_006529381.4	9969
chr1	105876267	105876776	510	*	A_WT_peak_652	26	3.94315	5.77061	2.66781	34	Distal Intergenic	1	105873286	105873390	105	1	Gm26214	rna-XR_004936740.1	2981
chr1	105905293	105905493	201	*	A_WT_peak_653	20	3.8443	4.93333	2.03576	18	Distal Intergenic	1	105916929	105961804	44876	1	Zcchc2	rna-XM_006529512.5	-11436
chr1	105917919	105918302	384	*	A_WT_peak_654	67	4.88594	10.5239	6.79233	59	Promoter (<=1kb)	1	105907080	105918012	10933	2	Gm7160	rna-NR_151625.1	0
chr1	105994832	105994982	151	*	A_WT_peak_655	22	3.89118	5.21689	2.25186	17	Distal Intergenic	1	105918136	105961807	43672	1	Zcchc2	rna-NM_001122676.1	76696
chr1	106099057	106099513	457	*	A_WT_peak_656	169	7.56425	21.4659	16.9267	163	Promoter (<=1kb)	1	106080355	106099254	18900	2	Gm20753	rna-NR_040630.1	0
chr1	106199527	106199759	233	*	A_WT_peak_657	39	4.87911	7.29261	3.92658	162	Intron (rna-NM_133821.3/gene-Phlpp1, intron 1 of 16)	1	106099599	106321975	222377	1	Phlpp1	rna-NM_133821.3	99928
chr1	106468808	106469016	209	*	A_WT_peak_658	21	3.91018	5.0348	2.1122	118	3' UTR	1	106474266	106474285	20	2	rna-NR_106164.1	rna-Mir3473f	5269
chr1	106528128	106528283	156	*	A_WT_peak_659	25	4.11877	5.57327	2.51035	145	Intron (rna-NM_009741.5/gene-Bcl2, intron 1 of 1)	1	106531493	106542675	11183	2	Gm37053	rna-XR_878433.2	14392
chr1	106666483	106666669	187	*	A_WT_peak_660	36	4.35214	6.99429	3.67584	75	Intron (rna-NM_027534.2/gene-Kdsr, intron 7 of 9)	1	106648140	106687472	39333	2	Kdsr	rna-NM_027534.2	20803
chr1	106674231	106674415	185	*	A_WT_peak_661	13	3.17109	3.89229	1.3289	70	Intron (rna-NM_027534.2/gene-Kdsr, intron 5 of 9)	1	106648140	106687472	39333	2	Kdsr	rna-NM_027534.2	13057
chr1	106686851	106687564	714	*	A_WT_peak_662	48	4.58725	8.3068	4.8092	684	Promoter (<=1kb)	1	106648140	106687472	39333	2	Kdsr	rna-NM_027534.2	0
chr1	107574012	107574189	178	*	A_WT_peak_663	38	4.98563	7.18328	3.83141	60	Distal Intergenic	1	107614730	107621244	6515	1	Gm15389	rna-XR_387297.3	-40541
chr1	113334986	113335236	251	*	A_WT_peak_664	30	4.53239	6.21905	3.02288	37	Distal Intergenic	1	113073251	113078443	5193	1	Gm46244	rna-XR_001779863.1	261735
chr1	114214862	114215067	206	*	A_WT_peak_665	29	4.43587	6.06832	2.91019	45	Distal Intergenic	1	113858655	113863035	4381	2	Gm32985	rna-XR_387305.4	-351827
chr1	117229769	117230067	299	*	A_WT_peak_666	16	3.62591	4.41615	1.65115	98	Distal Intergenic	1	117464031	117464194	164	1	Gm24030	rna-XR_004936792.1	-233964
chr1	118238909	118239129	221	*	A_WT_peak_667	78	6.25525	11.652	7.81648	102	Promoter (<=1kb)	1	118226244	118239076	12833	2	Tsn	rna-NM_011650.4	0
chr1	118302559	118302869	311	*	A_WT_peak_668	21	3.93717	5.07638	2.14357	7	Distal Intergenic	1	118314976	118537192	222217	1	Clasp1	rna-XM_006529920.2	-12107
chr1	118317350	118317510	161	*	A_WT_peak_669	38	4.12426	7.14249	3.80223	26	Intron (rna-XM_006529920.2/gene-Clasp1, intron 1 of 43)	1	118316788	118537192	220405	1	Clasp1	rna-NM_029709.2	562
chr1	118386890	118387346	457	*	A_WT_peak_670	46	4.06435	8.1326	4.65944	450	Promoter (<=1kb)	1	118386399	118386995	597	2	2900060B14Rik	rna-NR_027901.1	0
chr1	118415443	118415701	259	*	A_WT_peak_671	30	4.41586	6.2834	3.07598	176	Intron (rna-XM_006529920.2/gene-Clasp1, intron 8 of 43)	1	118386399	118386995	597	2	2900060B14Rik	rna-NR_027901.1	-28448
chr1	118421080	118421249	170	*	A_WT_peak_672	25	3.86304	5.63705	2.56073	164	Intron (rna-XM_006529920.2/gene-Clasp1, intron 8 of 43)	1	118386399	118386995	597	2	2900060B14Rik	rna-NR_027901.1	-34085
chr1	118426171	118426323	153	*	A_WT_peak_673	41	4.35449	7.57301	4.16962	54	Intron (rna-XM_006529920.2/gene-Clasp1, intron 9 of 43)	1	118386399	118386995	597	2	2900060B14Rik	rna-NR_027901.1	-39176
chr1	118530975	118531310	336	*	A_WT_peak_674	38	4.65816	7.22355	3.8658	58	Intron (rna-XM_006529920.2/gene-Clasp1, intron 43 of 43)	1	118555646	118612898	57253	1	Tfcp2l1	rna-XM_006529961.3	-24336
chr1	118663327	118663665	339	*	A_WT_peak_675	47	5.07385	8.21615	4.72986	68	Distal Intergenic	1	118609551	118609680	130	1	LOC115487679	gene-LOC115487679	53776
chr1	118698630	118698868	239	*	A_WT_peak_676	32	4.04464	6.45605	3.2194	7	Distal Intergenic	1	118609551	118609680	130	1	LOC115487679	gene-LOC115487679	89079
chr1	118734576	118734775	200	*	A_WT_peak_677	40	4.60034	7.42033	4.03693	98	Distal Intergenic	1	118609551	118609680	130	1	LOC115487679	gene-LOC115487679	125025
chr1	118810782	118810961	180	*	A_WT_peak_678	30	4.08131	6.25704	3.05474	23	Intron (rna-NM_001081125.1/gene-Gli2, intron 3 of 13)	1	118881950	118882030	81	1	Mir6346	rna-NR_105764.1	-70989
chr1	118823284	118823466	183	*	A_WT_peak_679	46	4.80439	8.0753	4.609	61	Intron (rna-NM_001081125.1/gene-Gli2, intron 2 of 13)	1	118881950	118882030	81	1	Mir6346	rna-NR_105764.1	-58484
chr1	118975648	118975843	196	*	A_WT_peak_680	25	3.7472	5.68029	2.59558	62	Intron (rna-NM_001081125.1/gene-Gli2, intron 1 of 13)	1	118761791	118981349	219559	2	Gli2	rna-NM_001081125.1	5506
chr1	119011811	119012163	353	*	A_WT_peak_681	38	4.45037	7.16373	3.82003	235	Distal Intergenic	1	118761858	118987578	225721	2	Gli2	rna-XM_036160522.1	-24233
chr1	119070356	119070900	545	*	A_WT_peak_682	68	5.43957	10.5729	6.83662	263	Distal Intergenic	1	119085298	119086483	1186	1	Gm8321	gene-Gm8321	-14398
chr1	119194936	119195102	167	*	A_WT_peak_683	28	4.05889	5.96243	2.82382	157	Distal Intergenic	1	119169701	119170495	795	2	Gm3508	gene-Gm3508	-24441
chr1	119317018	119317171	154	*	A_WT_peak_684	20	3.21048	4.92184	2.02724	26	Distal Intergenic	1	119343193	119349978	6786	2	Inhbb	rna-NM_008381.4	32807
chr1	119373068	119373274	207	*	A_WT_peak_685	48	4.99366	8.4013	4.89263	51	Promoter (<=1kb)	1	119367869	119373225	5357	2	Gm33490	rna-XR_003947965.2	0
chr1	119422860	119423048	189	*	A_WT_peak_686	22	3.52289	5.28437	2.28939	87	Intron (rna-NM_022327.5/gene-Ralb, intron 1 of 4)	1	119427213	119427598	386	1	Gm29454	gene-Gm29454	-4165
chr1	119432297	119432831	535	*	A_WT_peak_687	127	6.0473	16.9799	12.7335	190	Promoter (<=1kb)	1	119398035	119432512	34478	2	Ralb	rna-NM_022327.5	0
chr1	119453641	119453876	236	*	A_WT_peak_688	117	5.97206	15.9732	11.798	129	Promoter (<=1kb)	1	119453884	119456713	2830	1	Tmem185b	rna-NM_146103.2	-8
chr1	119466137	119466294	158	*	A_WT_peak_689	16	3.25205	4.39432	1.65115	128	Promoter (2-3kb)	1	119457210	119463895	6686	2	3830432H09Rik	rna-NR_126486.1	-2242
chr1	119576331	119576744	414	*	A_WT_peak_690	63	4.97328	10.027	6.34321	322	Promoter (<=1kb)	1	119472762	119576489	103728	2	Epb41l5	rna-XM_006529397.3	0
chr1	119764901	119765712	812	*	A_WT_peak_691	149	7.48931	19.3465	14.9375	492	Promoter (<=1kb)	1	119580197	119765078	184882	2	Ptpn4	rna-XM_030252303.2	0
chr1	119837750	119838102	353	*	A_WT_peak_692	22	3.50789	5.25762	2.28266	157	Exon (rna-NM_175106.4/gene-Tmem177, exon 2 of 2)	1	119835620	119840913	5294	2	Tmem177	rna-NM_175106.4	2811
chr1	119858797	119859046	250	*	A_WT_peak_693	24	3.89745	5.4551	2.41611	100	Intron (rna-XM_006529404.3/gene-Cfap221, intron 14 of 17)	1	119835620	119840913	5294	2	Tmem177	rna-NM_175106.4	-17884
chr1	119860455	119860629	175	*	A_WT_peak_694	36	4.48083	6.92977	3.62109	14	Exon (rna-XM_006529404.3/gene-Cfap221, exon 14 of 18)	1	119835620	119840913	5294	2	Tmem177	rna-NM_175106.4	-19542
chr1	119887399	119887560	162	*	A_WT_peak_695	20	3.42777	4.89831	2.00967	142	Promoter (1-2kb)	1	119851070	119885827	34758	2	Cfap221	rna-XM_006529404.3	-1572
chr1	120087030	120087390	361	*	A_WT_peak_696	43	4.83866	7.82337	4.38753	193	Intron (rna-XM_006529893.4/gene-3110009E18Rik, intron 2 of 5)	1	120053307	120115920	62614	1	3110009E18Rik	rna-XM_017312452.3	33723
chr1	120137871	120138074	204	*	A_WT_peak_697	29	4.17017	6.14567	2.97373	42	Distal Intergenic	1	120186179	120191963	5785	1	LOC118567776	rna-XR_004936309.1	-48105
chr1	120192980	120193139	160	*	A_WT_peak_698	22	3.40776	5.29595	2.2897	104	Promoter (<=1kb)	1	120154144	120193016	38873	2	Steap3	rna-NM_133186.4	0
chr1	120276933	120277205	273	*	A_WT_peak_699	16	3.47011	4.35642	1.64906	26	Distal Intergenic	1	120268312	120270903	2592	1	C1ql2	rna-NM_207233.1	8621
chr1	120310349	120310539	191	*	A_WT_peak_700	20	3.62395	5.01063	2.09489	131	Distal Intergenic	1	120268312	120270903	2592	1	C1ql2	rna-NM_207233.1	42037
chr1	120324007	120324224	218	*	A_WT_peak_701	17	3.50396	4.60525	1.7904	173	Distal Intergenic	1	120354803	120363469	8667	2	Gm46154	rna-XR_001779375.1	39245
chr1	120585021	120585347	327	*	A_WT_peak_702	49	5.2386	8.48881	4.9703	171	Intron (rna-XR_387323.3/gene-2610027F03Rik, intron 2 of 7)	1	120598940	120618133	19194	1	2610027F03Rik	rna-XR_387332.2	-13593
chr1	120605163	120605326	164	*	A_WT_peak_703	18	3.65933	4.64843	1.82277	159	Intron (rna-XR_387323.3/gene-2610027F03Rik, intron 3 of 7)	1	120598940	120618133	19194	1	2610027F03Rik	rna-XR_387332.2	6223
chr1	121036938	121037186	249	*	A_WT_peak_704	25	3.98659	5.59868	2.53045	209	Intron (rna-NR_038008.1/gene-Celrr, intron 2 of 4)	1	121015134	121048704	33571	1	Celrr	rna-NR_110450.1	21804
chr1	121254912	121255329	418	*	A_WT_peak_705	54	5.00257	9.07282	5.48863	170	5' UTR	1	121232082	121255407	23326	2	Insig2	rna-NM_001271531.1	78
chr1	121255798	121256050	253	*	A_WT_peak_706	32	4.07249	6.50531	3.2612	232	Promoter (<=1kb)	1	121232082	121255753	23672	2	Insig2	rna-NM_133748.2	-45
chr1	121404113	121404350	238	*	A_WT_peak_707	13	3.19776	3.93387	1.35625	89	Intron (rna-NM_001025156.2/gene-Ccdc93, intron 12 of 23)	1	121358796	121434189	75394	1	Ccdc93	rna-NM_029955.3	45317
chr1	121495430	121495740	311	*	A_WT_peak_708	30	4.53239	6.21905	3.02288	78	Promoter (<=1kb)	1	121481564	121495709	14146	2	Ddx18	rna-NM_025860.3	0
chr1	123172533	123172685	153	*	A_WT_peak_709	16	3.62591	4.41615	1.65115	81	Distal Intergenic	1	123317530	123317660	131	2	Gm24791	rna-XR_004936798.1	144975
chr1	124314876	124315075	200	*	A_WT_peak_710	47	5.43887	8.18462	4.70202	137	Intron (rna-XM_006529626.5/gene-Dpp10, intron 1 of 25)	1	124351970	124364673	12704	2	Gm41941	rna-XR_878486.1	49598
chr1	125090639	125090806	168	*	A_WT_peak_711	30	4.53239	6.21905	3.02288	37	Distal Intergenic	1	125320642	125363464	42823	2	Actr3	rna-NM_001205385.1	272658
chr1	125363103	125363663	561	*	A_WT_peak_712	81	5.61378	12.025	8.15697	416	Promoter (<=1kb)	1	125320642	125363464	42823	2	Actr3	rna-NM_001205385.1	0
chr1	125488108	125488729	622	*	A_WT_peak_713	455	12.7618	51.4866	45.5576	254	Promoter (<=1kb)	1	125488275	125523567	35293	1	Slc35f5	rna-XR_001778392.3	0
chr1	125552519	125552723	205	*	A_WT_peak_714	22	4.07915	5.29532	2.28939	81	Distal Intergenic	1	125604733	125801599	196867	1	Gpr39	rna-NM_027677.2	-52010
chr1	125682819	125683069	251	*	A_WT_peak_715	18	3.68296	4.68484	1.84941	170	Intron (rna-NM_027677.2/gene-Gpr39, intron 1 of 1)	1	125604733	125801599	196867	1	Gpr39	rna-NM_027677.2	78086
chr1	126145755	126145910	156	*	A_WT_peak_716	15	3.48767	4.20623	1.54487	54	Intron (rna-NM_172484.3/gene-Nckap5, intron 5 of 14)	1	125991237	126030286	39050	1	Gm35562	rna-XR_003948707.2	154518
chr1	126332815	126333143	329	*	A_WT_peak_717	21	3.93717	5.07638	2.14357	240	Intron (rna-NM_172484.3/gene-Nckap5, intron 2 of 14)	1	125841375	126383531	542157	2	Nckap5	rna-XM_030252628.2	50388
chr1	126420277	126420691	415	*	A_WT_peak_718	29	4.30674	6.11021	2.94451	83	Promoter (<=1kb)	1	125841373	126420664	579292	2	Nckap5	rna-NM_172484.3	0
chr1	126755318	126755469	152	*	A_WT_peak_719	13	3.27374	3.88226	1.32154	17	Intron (rna-NM_001081756.1/gene-Nckap5, intron 1 of 16)	1	125841373	126758369	916997	2	Nckap5	rna-NM_001081756.1	2900
chr1	126926570	126926793	224	*	A_WT_peak_720	19	3.80582	4.87408	1.99187	120	Distal Intergenic	1	126944079	126952214	8136	2	Gm41945	rna-XR_878500.2	25421
chr1	126945853	126946136	284	*	A_WT_peak_721	20	3.87038	4.9735	2.0662	28	Intron (rna-XR_878500.2/gene-Gm41945, intron 3 of 4)	1	126944079	126952214	8136	2	Gm41945	rna-XR_878500.2	6078
chr1	127132574	127133020	447	*	A_WT_peak_722	37	4.06637	7.03281	3.70864	127	Promoter (<=1kb)	1	127132705	127412786	280082	1	Mgat5	rna-XM_006529057.5	0
chr1	127241602	127242270	669	*	A_WT_peak_723	25	3.88276	5.66999	2.58744	569	Intron (rna-XM_006529056.5/gene-Mgat5, intron 4 of 18)	1	127228146	127412786	184641	1	Mgat5	rna-XM_036166232.1	13456
chr1	127337400	127337726	327	*	A_WT_peak_724	59	5.31079	9.6261	5.98244	166	Intron (rna-XM_006529056.5/gene-Mgat5, intron 12 of 18)	1	127315193	127347015	31823	2	Gm51746	rna-XR_003948719.1	9289
chr1	127424688	127424837	150	*	A_WT_peak_725	36	4.51768	6.99105	3.67292	29	Intron (rna-NM_028135.2/gene-Tmem163, intron 6 of 7)	1	127380557	127407206	26650	2	Gm41947	rna-XR_001779393.2	-17482
chr1	127676532	127676750	219	*	A_WT_peak_726	30	4.531	6.21688	3.02288	43	Exon (rna-NM_001033041.2/gene-Acmsd, exon 5 of 10)	1	127657031	127660713	3683	2	Gm35993	rna-NR_168316.1	-15819
chr1	127685242	127685399	158	*	A_WT_peak_727	13	3.29502	3.91446	1.34341	49	Intron (rna-NM_001033041.2/gene-Acmsd, intron 6 of 9)	1	127681354	127701791	20438	2	2900009J06Rik	rna-NR_045298.1	16392
chr1	127701531	127702194	664	*	A_WT_peak_728	161	7.65684	20.6826	16.1895	437	Promoter (<=1kb)	1	127681354	127701791	20438	2	2900009J06Rik	rna-NR_045298.1	0
chr1	127739707	127739859	153	*	A_WT_peak_729	20	3.5683	4.91937	2.02529	145	Distal Intergenic	1	127741218	127758095	16878	2	Map3k19	rna-XM_036163719.1	18236
chr1	127796423	127796762	340	*	A_WT_peak_730	50	5.31708	8.61806	5.08426	243	Promoter (<=1kb)	1	127796492	127871612	75121	1	Rab3gap1	rna-XM_006529405.3	0
chr1	127853565	127853741	177	*	A_WT_peak_731	37	4.91384	7.07004	3.74052	4	Intron (rna-XM_006529405.3/gene-Rab3gap1, intron 13 of 24)	1	127851928	127871612	19685	1	Rab3gap1	rna-XM_006529407.4	1637
chr1	128030522	128031183	662	*	A_WT_peak_732	259	8.93271	31.0743	25.9841	370	Promoter (<=1kb)	1	128031016	128165472	134457	1	R3hdm1	rna-XM_006529418.4	0
chr1	128171725	128172733	1009	*	A_WT_peak_733	41	4.06888	7.58679	4.18139	205	Promoter (<=1kb)	1	128172296	128179817	7522	1	Gm41949	rna-XR_878509.3	0
chr1	128287297	128287848	552	*	A_WT_peak_734	134	6.95214	17.7393	13.44	171	Promoter (<=1kb)	1	128259312	128287442	28131	2	Mcm6	rna-NM_001313695.1	0
chr1	128344553	128345454	902	*	A_WT_peak_735	74	5.59939	11.2419	7.44399	311	Promoter (<=1kb)	1	128291444	128345153	53710	2	Dars	rna-NM_177445.5	0
chr1	128518534	128518711	178	*	A_WT_peak_736	22	3.80181	5.3004	2.2927	120	5' UTR	1	128515936	128518781	2846	2	Cxcr4	rna-XM_006529114.3	70
chr1	128537441	128537939	499	*	A_WT_peak_737	87	6.87746	12.7123	8.78606	208	Distal Intergenic	1	128515936	128520036	4101	2	Cxcr4	rna-NM_009911.3	-17405
chr1	128570137	128570334	198	*	A_WT_peak_738	24	4.07901	5.51111	2.46042	160	Distal Intergenic	1	128515936	128520036	4101	2	Cxcr4	rna-NM_009911.3	-50101
chr1	128861975	128862166	192	*	A_WT_peak_739	25	4.17301	5.65801	2.57763	22	Distal Intergenic	1	128813646	128813756	111	2	Gm23056	rna-XR_004936709.1	-48219
chr1	129100741	129100895	155	*	A_WT_peak_740	30	4.53239	6.21905	3.02288	97	Distal Intergenic	1	129201010	129791119	590110	1	Thsd7b	rna-XM_011247966.4	-100115
chr1	129200363	129200946	584	*	A_WT_peak_741	52	5.39795	8.75086	5.20171	214	Promoter (<=1kb)	1	129201010	129791119	590110	1	Thsd7b	rna-XM_011247966.4	-64
chr1	129554844	129555013	170	*	A_WT_peak_742	30	4.53239	6.21905	3.02288	161	Intron (rna-XM_011247966.4/gene-Thsd7b, intron 4 of 12)	1	129536296	129543926	7631	2	Gm36347	rna-XR_387357.3	-10918
chr1	130643390	130643732	343	*	A_WT_peak_743	53	4.41085	8.87579	5.31314	305	Promoter (<=1kb)	1	130616780	130643558	26779	2	Pfkfb2	rna-NR_027859.1	0
chr1	130692888	130693215	328	*	A_WT_peak_744	37	4.54259	7.03239	3.70856	292	Promoter (<=1kb)	1	130694121	130712170	18050	1	Gm28856	rna-NR_151623.1	-906
chr1	130717913	130718083	171	*	A_WT_peak_745	34	4.66713	6.68081	3.40871	40	Intron (rna-XM_006529787.5/gene-Fcamr, intron 2 of 10)	1	130712444	130747053	34610	1	Fcamr	rna-XM_017321925.3	5469
chr1	130882821	130883000	180	*	A_WT_peak_746	30	4.53239	6.21905	3.02288	56	Distal Intergenic	1	130891227	130900269	9043	1	Gm41952	rna-XR_878521.1	-8227
chr1	130939115	130939368	254	*	A_WT_peak_747	19	3.79317	4.85459	1.97715	79	Distal Intergenic	1	130947459	130950957	3499	1	Il10	rna-XM_036162094.1	-8091
chr1	131003213	131003579	367	*	A_WT_peak_748	18	3.3013	4.67894	1.8459	40	Promoter (1-2kb)	1	131001395	131001488	94	2	Gm25549	gene-Gm25549	-1725
chr1	131025459	131025699	241	*	A_WT_peak_749	54	4.79583	9.01743	5.43935	170	Promoter (<=1kb)	1	130981437	131025580	44144	2	Mapkapk2	rna-NM_008551.2	0
chr1	131035074	131035294	221	*	A_WT_peak_750	36	4.35214	6.99429	3.67584	122	Distal Intergenic	1	131040473	131043644	3172	1	Gm51643	rna-XR_003947991.2	-5179
chr1	131080854	131081022	169	*	A_WT_peak_751	32	4.18496	6.43318	3.20068	105	Promoter (<=1kb)	1	131080903	131100361	19459	1	Eif2d	rna-XR_004940652.1	0
chr1	131088557	131088707	151	*	A_WT_peak_752	16	3.39146	4.42572	1.65772	25	Intron (rna-XR_004940652.1/gene-Eif2d, intron 6 of 12)	1	131080944	131101208	20265	1	Eif2d	rna-NM_001136070.1	7613
chr1	131116671	131116845	175	*	A_WT_peak_753	25	3.73023	5.6506	2.57256	121	Intron (rna-NM_001311094.2/gene-Rassf5, intron 1 of 4)	1	131104147	131127922	23776	2	Rassf5	rna-NM_001311094.2	11077
chr1	131138033	131138193	161	*	A_WT_peak_754	23	3.68522	5.33806	2.32284	28	Intron (rna-NM_001313731.1/gene-Rassf5, intron 2 of 5)	1	131104147	131127922	23776	2	Rassf5	rna-NM_001311094.2	-10111
chr1	131276371	131276593	223	*	A_WT_peak_755	27	4.27144	5.8117	2.70134	154	Intron (rna-XR_004935378.1/gene-Gm51644, intron 1 of 2)	1	131197923	131207339	9417	2	Ikbke	rna-XR_387186.4	-69032
chr1	131309608	131309766	159	*	A_WT_peak_756	37	4.74221	7.07326	3.74268	141	Intron (rna-XR_003947997.1/gene-Gm51644, intron 3 of 3)	1	131197923	131207339	9417	2	Ikbke	rna-XR_387186.4	-102269
chr1	131435438	131435601	164	*	A_WT_peak_757	14	3.32837	4.13695	1.49605	132	Exon (gene-LOC118567330/gene-LOC118567330, exon 1 of 1)	1	131365211	131439168	73958	2	LOC118567330	gene-LOC118567330	3567
chr1	131454734	131455660	927	*	A_WT_peak_758	468	9.4652	52.8541	46.8921	528	Promoter (<=1kb)	1	131455641	131466773	11133	1	Fam72a	rna-NM_175382.4	0
chr1	131548986	131549150	165	*	A_WT_peak_759	14	3.31869	4.12192	1.4862	157	Distal Intergenic	1	131558340	131560823	2484	2	Gm8532	gene-Gm8532	11673
chr1	131589587	131589812	226	*	A_WT_peak_760	35	4.25815	6.83108	3.53644	73	5' UTR	1	131566052	131603245	37194	1	Ctse	rna-NM_007799.3	23535
chr1	131615808	131616142	335	*	A_WT_peak_761	62	5.48657	9.93661	6.26162	115	Promoter (<=1kb)	1	131616412	131646288	29877	1	Rab7b	rna-XM_036163929.1	-270
chr1	131728335	131728489	155	*	A_WT_peak_762	16	3.32911	4.32578	1.62825	44	Intron (rna-XM_011247967.4/gene-Pm20d1, intron 2 of 12)	1	131725136	131749210	24075	1	Pm20d1	rna-NM_001357478.1	3199
chr1	131794901	131795121	221	*	A_WT_peak_763	70	5.55243	10.7822	7.02606	49	Promoter (<=1kb)	1	131794948	131800625	5678	1	Rab29	rna-XR_004941858.1	0
chr1	131795541	131795741	201	*	A_WT_peak_764	21	3.5149	5.04812	2.12301	171	Intron (rna-XR_004941858.1/gene-Rab29, intron 1 of 5)	1	131795015	131800625	5611	1	Rab29	rna-NM_144875.2	526
chr1	131838070	131838607	538	*	A_WT_peak_765	237	9.10561	28.6873	23.7248	51	Promoter (<=1kb)	1	131838196	131864059	25864	1	Nucks1	rna-NM_001145804.1	0
chr1	131875941	131876111	171	*	A_WT_peak_766	21	3.57269	5.14692	2.19749	2	Distal Intergenic	1	131890653	131910710	20058	1	Slc45a3	rna-NM_001177628.2	-14542
chr1	131910842	131911021	180	*	A_WT_peak_767	33	3.82121	6.56138	3.30767	38	Downstream (<=300bp)	1	131902027	131910707	8681	1	Slc45a3	rna-XM_006529342.3	8815
chr1	131935154	131936007	854	*	A_WT_peak_768	127	6.8418	17.0498	12.7988	709	Promoter (<=1kb)	1	131935358	131954186	18829	1	Elk4	rna-NM_001376957.1	0
chr1	131947736	131948238	503	*	A_WT_peak_769	36	4.19029	6.98785	3.67046	284	Exon (rna-XR_001783717.3/gene-Mfsd4a, exon 10 of 10)	1	131936083	131954186	18104	1	Elk4	rna-NM_001376956.1	11653
chr1	131953840	131953989	150	*	A_WT_peak_770	27	3.98447	5.83923	2.72365	31	3' UTR	1	131936083	131954186	18104	1	Elk4	rna-NM_001376956.1	17757
chr1	132085363	132085530	168	*	A_WT_peak_771	22	3.46365	5.17851	2.2224	0	Distal Intergenic	1	132078333	132081880	3548	1	Gm30242	rna-XR_387381.4	7030
chr1	132120715	132120876	162	*	A_WT_peak_772	18	3.27995	4.64167	1.81831	41	Exon (rna-XR_004935384.1/gene-Gm29695, exon 1 of 2)	1	132119234	132137285	18052	1	Gm29695	rna-XR_004935384.1	1481
chr1	132138827	132139166	340	*	A_WT_peak_773	28	3.79388	6.00724	2.86006	264	Intron (rna-XM_036163412.1/gene-Lemd1, intron 1 of 4)	1	132148007	132185120	37114	1	Lemd1	rna-XM_011247970.2	-8841
chr1	132159326	132159494	169	*	A_WT_peak_774	29	3.99232	6.10481	2.9407	9	Intron (rna-XM_036163412.1/gene-Lemd1, intron 3 of 4)	1	132155409	132185120	29712	1	Lemd1	rna-XM_006529350.5	3917
chr1	132209768	132210157	390	*	A_WT_peak_775	37	4.25595	7.10657	3.77127	131	Promoter (1-2kb)	1	132212127	132212623	497	1	Gm7241	rna-XM_036154841.1	-1970
chr1	132319243	132319697	455	*	A_WT_peak_776	41	4.34516	7.55573	4.15513	171	Promoter (<=1kb)	1	132284053	132319661	35609	2	Tmcc2	rna-XM_006529852.4	0
chr1	132345083	132345300	218	*	A_WT_peak_777	58	4.88762	9.52236	5.88907	84	Promoter (<=1kb)	1	132345127	132380915	35789	1	Dstyk	rna-XR_387156.4	0
chr1	132382550	132382708	159	*	A_WT_peak_778	22	3.87928	5.19819	2.23738	23	Intron (rna-NM_172516.4/gene-Dstyk, intron 5 of 12)	1	132394366	132404802	10437	2	6030442K20Rik	rna-NR_165177.1	22094
chr1	132511639	132511797	159	*	A_WT_peak_779	16	3.25966	4.40708	1.65115	113	Intron (rna-XM_011248025.3/gene-Nfasc, intron 18 of 21)	1	132487986	132492188	4203	1	Gm51646	rna-XR_003948000.2	23653
chr1	132535170	132535349	180	*	A_WT_peak_780	25	3.43359	5.56675	2.50525	106	3' UTR	1	132492428	132547098	54671	2	Nfasc	rna-XM_011248025.3	11749
chr1	132558493	132558644	152	*	A_WT_peak_781	26	3.92281	5.73677	2.64161	127	Intron (rna-NM_001160316.1/gene-Nfasc, intron 5 of 26)	1	132492428	132547098	54671	2	Nfasc	rna-XM_011248025.3	-11395
chr1	132621770	132621963	194	*	A_WT_peak_782	24	3.77672	5.49236	2.44581	112	Intron (rna-XM_036165381.1/gene-Nfasc, intron 1 of 29)	1	132492428	132635011	142584	2	Nfasc	rna-XM_036165381.1	13048
chr1	132660047	132660238	192	*	A_WT_peak_783	29	3.84318	6.09624	2.93268	151	Exon (rna-NR_045892.1/gene-Gm10538, exon 3 of 3)	1	132657091	132660564	3474	1	Gm10538	rna-NR_045892.1	2956
chr1	132899480	132899650	171	*	A_WT_peak_784	13	3.0562	3.88412	1.32278	90	Promoter (<=1kb)	1	132889388	132899426	10039	2	Gm38687	rna-XR_878531.1	-54
chr1	132952840	132953248	409	*	A_WT_peak_785	109	6.3287	15.0972	10.9853	367	Promoter (<=1kb)	1	132913843	132953154	39312	2	Mdm4	rna-NM_001302801.1	0
chr1	132973968	132974164	197	*	A_WT_peak_786	31	4.0081	6.39123	3.16573	136	5' UTR	1	132973750	133036426	62677	1	Pik3c2b	rna-NM_001099276.2	218
chr1	132984818	132985333	516	*	A_WT_peak_787	40	4.1143	7.40039	4.01984	248	Intron (rna-XM_006529532.2/gene-Pik3c2b, intron 1 of 32)	1	132979244	133036429	57186	1	Pik3c2b	rna-XM_006529531.5	5574
chr1	133004829	133005097	269	*	A_WT_peak_788	34	3.90208	6.71816	3.44015	219	Exon (rna-XM_006529532.2/gene-Pik3c2b, exon 9 of 33)	1	132996243	133036429	40187	1	Pik3c2b	rna-XM_006529533.5	8586
chr1	133058732	133059495	764	*	A_WT_peak_789	169	6.62006	21.4902	16.9493	561	Promoter (<=1kb)	1	133058904	133067538	8635	1	Ppp1r15b	rna-NM_133819.3	0
chr1	133073903	133074092	190	*	A_WT_peak_790	29	4.13615	6.08977	2.92774	25	Distal Intergenic	1	133058904	133067538	8635	1	Ppp1r15b	rna-NM_133819.3	14999
chr1	133099762	133100033	272	*	A_WT_peak_791	66	4.80181	10.3436	6.62887	145	Intron (rna-XM_006529534.4/gene-Plekha6, intron 2 of 28)	1	133108900	133231169	122270	1	Plekha6	rna-XM_030253991.1	-8867
chr1	133109083	133109559	477	*	A_WT_peak_792	35	4.11769	6.85581	3.55784	348	5' UTR	1	133108939	133231169	122231	1	Plekha6	rna-XR_004942428.1	144
chr1	133132256	133132420	165	*	A_WT_peak_793	24	3.60773	5.43501	2.40013	26	Intron (rna-XM_006529534.4/gene-Plekha6, intron 3 of 28)	1	133135503	133137949	2447	2	Gm51648	rna-XR_004935393.1	5529
chr1	133137824	133138202	379	*	A_WT_peak_794	93	5.51347	13.3343	9.35748	45	Promoter (<=1kb)	1	133135503	133137949	2447	2	Gm51648	rna-XR_004935393.1	0
chr1	133213955	133214207	253	*	A_WT_peak_795	27	3.73795	5.90579	2.77787	53	Exon (rna-XM_006529534.4/gene-Plekha6, exon 21 of 29)	1	133177590	133197546	19957	2	Gm19461	rna-NR_037984.1	-16409
chr1	133277616	133277774	159	*	A_WT_peak_796	14	2.94926	4.05522	1.44065	5	Promoter (<=1kb)	1	133278412	133288058	9647	1	Ren1	rna-NM_031192.3	-638
chr1	133295665	133295862	198	*	A_WT_peak_797	19	2.80385	4.80582	1.94092	19	Intron (rna-XM_006529364.3/gene-Etnk2, intron 2 of 6)	1	133291310	133308056	16747	1	Etnk2	rna-NM_175443.5	4355
chr1	133336952	133337118	167	*	A_WT_peak_798	42	4.26917	7.70162	4.28081	161	Intron (rna-XM_006529277.5/gene-Sox13, intron 1 of 13)	1	133310038	133350460	40423	2	Sox13	rna-XM_006529277.5	13342
chr1	133392310	133392513	204	*	A_WT_peak_799	27	3.99493	5.85659	2.73778	16	Distal Intergenic	1	133310038	133352198	42161	2	Sox13	rna-XM_030252397.2	-40112
chr1	133537576	133538382	807	*	A_WT_peak_800	75	5.44631	11.3183	7.51361	591	Promoter (<=1kb)	1	133538206	133548910	10705	1	LOC118567635	rna-XR_004935395.1	0
chr1	133588688	133589147	460	*	A_WT_peak_801	35	4.27869	6.86683	3.56714	442	Promoter (<=1kb)	1	133547600	133589137	41538	2	Zc3h11a	rna-NM_001357228.1	0
chr1	133785247	133785520	274	*	A_WT_peak_802	28	3.81837	6.0515	2.89665	52	Promoter (1-2kb)	1	133787435	133818804	31370	1	Gm31515	rna-XR_878539.1	-1915
chr1	133822495	133822662	168	*	A_WT_peak_803	27	3.58238	5.85463	2.73653	49	Distal Intergenic	1	133824931	133834911	9981	2	Optc	rna-NM_001160421.2	12249
chr1	133858549	133858888	340	*	A_WT_peak_804	20	3.47476	4.97922	2.07072	164	Promoter (<=1kb)	1	133838046	133857820	19775	2	Prelp	rna-XM_006529084.5	-729
chr1	133889282	133889765	484	*	A_WT_peak_805	36	4.19955	7.00462	3.6846	325	Distal Intergenic	1	133905026	133926227	21202	1	Bmncr	rna-XR_878542.3	-15261
chr1	133905527	133905706	180	*	A_WT_peak_806	41	4.31741	7.50427	4.1099	54	Intron (rna-XR_878542.3/gene-Bmncr, intron 1 of 4)	1	133905038	133917977	12940	1	Bmncr	rna-XR_387409.3	489
chr1	133988651	133989197	547	*	A_WT_peak_807	79	5.00028	11.8049	7.95693	362	Promoter (<=1kb)	1	133987778	133988685	908	2	Gm19497	rna-NR_165647.1	0
chr1	134006926	134007126	201	*	A_WT_peak_808	35	3.49796	6.85157	3.55387	49	Promoter (<=1kb)	1	134002603	134006893	4291	2	Btg2	rna-NM_007570.2	-33
chr1	134020879	134021033	155	*	A_WT_peak_809	44	4.22718	7.90704	4.46118	115	Exon (rna-XR_387412.1/gene-Gm32039, exon 2 of 3)	1	134018558	134022914	4357	2	Gm32039	rna-XR_387412.1	1881
chr1	134026946	134027268	323	*	A_WT_peak_810	28	3.50429	5.93403	2.80065	7	Distal Intergenic	1	134018823	134022914	4092	2	Gm32039	rna-XR_387413.1	-4032
chr1	134033209	134033399	191	*	A_WT_peak_811	26	3.676	5.79283	2.68569	187	Distal Intergenic	1	134037084	134037588	505	1	Gm8618	rna-XM_036154878.1	-3685
chr1	134044192	134044384	193	*	A_WT_peak_812	29	4.17017	6.14567	2.97373	4	Intron (rna-NM_001284524.1/gene-Chit1, intron 1 of 10)	1	134038980	134079278	40299	1	Chit1	rna-NM_027979.2	5212
chr1	134150124	134150479	356	*	A_WT_peak_813	33	4.0134	6.66464	3.3954	181	Intron (rna-NM_001291928.1/gene-Adora1, intron 1 of 1)	1	134126953	134162594	35642	2	Adora1	rna-NM_001291928.1	12115
chr1	134226743	134227066	324	*	A_WT_peak_814	21	3.37844	5.02523	2.10558	1	Promoter (<=1kb)	1	134227200	134232030	4831	1	Gm32267	rna-XR_004935404.1	-134
chr1	134250393	134250552	160	*	A_WT_peak_815	48	4.0286	8.33078	4.83039	44	Intron (rna-NM_001144855.1/gene-Ppfia4, intron 11 of 28)	1	134224521	134260666	36146	2	Ppfia4	rna-NM_001144855.1	10114
chr1	134270297	134270591	295	*	A_WT_peak_816	81	4.79502	11.9974	8.13202	112	Intron (rna-XR_004934166.1/gene-Ppfia4, intron 1 of 28)	1	134224521	134272282	47762	2	Ppfia4	rna-XR_004934166.1	1691
chr1	134272247	134272594	348	*	A_WT_peak_817	252	8.64146	30.3294	25.279	198	Promoter (<=1kb)	1	134224521	134272282	47762	2	Ppfia4	rna-XR_004934166.1	0
chr1	134289167	134289721	555	*	A_WT_peak_818	44	4.56009	7.9503	4.49932	319	5' UTR	1	134273835	134289737	15903	2	Tmem183a	rna-NM_001042485.1	16
chr1	134327461	134327856	396	*	A_WT_peak_819	17	3.62445	4.59467	1.78239	275	Distal Intergenic	1	134333519	134339476	5958	1	Cyb5r1	rna-NM_001355133.1	-5663
chr1	134333530	134333775	246	*	A_WT_peak_820	50	5.07361	8.53791	5.0133	103	5' UTR	1	134333519	134339476	5958	1	Cyb5r1	rna-NR_149307.1	11
chr1	134342871	134343688	818	*	A_WT_peak_821	246	8.17508	29.629	24.614	204	Promoter (<=1kb)	1	134343116	134361089	17974	1	Adipor1	rna-NM_028320.4	0
chr1	134422283	134422890	608	*	A_WT_peak_822	74	5.08132	11.2869	7.48552	462	Promoter (<=1kb)	1	134422377	134435627	13251	1	Rabif	rna-NM_145510.2	0
chr1	134484372	134484818	447	*	A_WT_peak_823	161	6.32368	20.6766	16.1847	385	Intron (rna-XM_011248086.3/gene-Mgat4e, intron 1 of 6)	1	134487916	134560616	72701	1	Kdm5b	rna-NM_152895.2	-3098
chr1	134579899	134580112	214	*	A_WT_peak_824	23	3.4813	5.43346	2.39892	75	Intron (rna-XM_006529322.2/gene-Syt2, intron 1 of 8)	1	134574350	134680887	106538	1	Syt2	rna-NM_009307.4	5549
chr1	134594057	134594211	155	*	A_WT_peak_825	23	3.4408	5.35785	2.33841	7	Intron (rna-XM_006529322.2/gene-Syt2, intron 1 of 8)	1	134574350	134680887	106538	1	Syt2	rna-NM_009307.4	19707
chr1	134632742	134632902	161	*	A_WT_peak_826	27	3.35258	5.84503	2.72856	55	Intron (rna-XM_006529322.2/gene-Syt2, intron 1 of 8)	1	134637038	134680887	43850	1	Syt2	rna-NM_001355726.1	-4136
chr1	134651917	134652194	278	*	A_WT_peak_827	37	3.72382	7.12082	3.78372	13	Intron (rna-XM_006529322.2/gene-Syt2, intron 1 of 8)	1	134663930	134680887	16958	1	Syt2	rna-XM_036163153.1	-11736
chr1	134680590	134680752	163	*	A_WT_peak_828	14	2.85711	4.05903	1.44304	107	3' UTR	1	134670683	134680887	10205	1	Syt2	rna-XM_006529324.4	9907
chr1	134857733	134857994	262	*	A_WT_peak_829	38	4.61899	7.15888	3.81585	170	Intron (rna-NM_001081307.2/gene-Ppp1r12b, intron 1 of 24)	1	134873972	134874037	66	2	Gm51265	rna-NR_162775.1	16043
chr1	134866040	134866265	226	*	A_WT_peak_830	33	4.27175	6.57976	3.32385	81	Exon (rna-XR_003948727.2/gene-Gm51748, exon 2 of 2)	1	134873972	134874037	66	2	Gm51265	rna-NR_162775.1	7772
chr1	134872055	134872329	275	*	A_WT_peak_831	19	3.51434	4.83057	1.95898	185	Exon (rna-XR_003948727.2/gene-Gm51748, exon 2 of 2)	1	134873972	134874037	66	2	Gm51265	rna-NR_162775.1	1708
chr1	134883178	134883839	662	*	A_WT_peak_832	168	7.7355	21.3507	16.818	534	Promoter (<=1kb)	1	134682404	134883678	201275	2	Ppp1r12b	rna-NM_001081307.2	0
chr1	134890016	134890403	388	*	A_WT_peak_833	157	7.43237	20.1945	15.7326	291	Promoter (<=1kb)	1	134890303	134901918	11616	1	Ube2t	rna-NM_001278115.1	0
chr1	134915264	134915653	390	*	A_WT_peak_834	31	3.88228	6.42177	3.19091	24	Exon (rna-XM_011248036.4/gene-Lgr6, exon 18 of 18)	1	134890303	134901918	11616	1	Ube2t	rna-NM_026024.3	24961
chr1	134974873	134975022	150	*	A_WT_peak_835	52	5.19846	8.75004	5.201	54	Intron (rna-XM_011248036.4/gene-Lgr6, intron 4 of 17)	1	134911038	135026955	115918	2	Lgr6	rna-XM_011248036.4	51933
chr1	135158016	135158186	171	*	A_WT_peak_836	51	4.621	8.68223	5.14046	98	Promoter (1-2kb)	1	135159733	135160965	1233	1	Gm4204	gene-Gm4204	-1547
chr1	135165746	135165972	227	*	A_WT_peak_837	29	3.88525	6.17188	2.99527	160	Distal Intergenic	1	135159733	135160965	1233	1	Gm4204	gene-Gm4204	6013
chr1	135241270	135241798	529	*	A_WT_peak_838	45	4.59106	8.00658	4.54825	167	Promoter (<=1kb)	1	135229273	135241475	12203	2	Timm17a	rna-NM_001360857.1	0
chr1	135286995	135287351	357	*	A_WT_peak_839	32	3.89022	6.43656	3.20356	319	Intron (rna-NM_053106.2/gene-Lmod1, intron 1 of 2)	1	135299194	135302801	3608	2	Shisa4	rna-NM_175259.4	15450
chr1	135357963	135358537	575	*	A_WT_peak_840	49	4.35708	8.46335	4.94795	7	Promoter (<=1kb)	1	135310050	135358237	48188	2	Ipo9	rna-NM_001357575.1	0
chr1	135359800	135360224	425	*	A_WT_peak_841	29	3.61034	6.14635	2.97418	135	Promoter (1-2kb)	1	135312746	135358260	45515	2	Ipo9	rna-XM_036163950.1	-1540
chr1	135382122	135382305	184	*	A_WT_peak_842	29	3.70092	6.08082	2.92088	134	Exon (rna-NM_173437.2/gene-Nav1, exon 20 of 30)	1	135382341	135382363	23	2	rna-NR_049188.1	rna-Mir1231	58
chr1	135468028	135468437	410	*	A_WT_peak_843	65	4.78533	10.3081	6.59663	181	Intron (rna-NM_173437.2/gene-Nav1, intron 1 of 29)	1	135443213	135460088	16876	1	Gm32940	rna-XR_003948729.2	24815
chr1	135544094	135544298	205	*	A_WT_peak_844	23	3.53802	5.31131	2.30169	158	Intron (rna-XM_017319809.1/gene-Nav1, intron 1 of 32)	1	135362326	135553078	190753	2	Nav1	rna-XM_017319809.1	8780
chr1	135573706	135573857	152	*	A_WT_peak_845	24	3.90837	5.47273	2.42996	103	Intron (rna-XM_017319805.2/gene-Nav1, intron 1 of 32)	1	135362326	135586225	223900	2	Nav1	rna-XM_017319805.2	12368
chr1	135574257	135574607	351	*	A_WT_peak_846	25	4.02108	5.65408	2.57458	164	Intron (rna-XM_017319805.2/gene-Nav1, intron 1 of 32)	1	135362326	135586225	223900	2	Nav1	rna-XM_017319805.2	11618
chr1	135603522	135603783	262	*	A_WT_peak_847	48	4.62664	8.38058	4.87446	174	Intron (rna-XM_006529370.4/gene-Nav1, intron 1 of 34)	1	135614371	135679970	65600	1	Csrp1	rna-XM_036157918.1	-10588
chr1	135680640	135680891	252	*	A_WT_peak_848	55	4.27216	9.17119	5.57625	213	Distal Intergenic	1	135693823	135696872	3050	1	Phlda3	rna-NM_013750.2	-12932
chr1	135693956	135694182	227	*	A_WT_peak_849	38	4.15808	7.2063	3.85097	205	5' UTR	1	135693823	135696872	3050	1	Phlda3	rna-NM_013750.2	133
chr1	135706791	135706967	177	*	A_WT_peak_850	23	3.54563	5.32486	2.31213	38	Promoter (2-3kb)	1	135709252	135738716	29465	1	Tnni1	rna-XM_036163551.1	-2285
chr1	135720811	135721024	214	*	A_WT_peak_851	16	2.95889	4.43312	1.66346	144	Intron (rna-XM_036163551.1/gene-Tnni1, intron 1 of 9)	1	135727159	135738727	11569	1	Tnni1	rna-NM_021467.5	-6135
chr1	135741946	135742556	611	*	A_WT_peak_852	24	3.38469	5.47114	2.42945	2	Distal Intergenic	1	135746336	135761079	14744	1	Lad1	rna-NM_133664.3	-3780
chr1	135747864	135748184	321	*	A_WT_peak_853	55	4.84677	9.11414	5.52529	176	Intron (rna-NM_133664.3/gene-Lad1, intron 1 of 9)	1	135746336	135761079	14744	1	Lad1	rna-NM_133664.3	1528
chr1	135785037	135785235	199	*	A_WT_peak_854	22	3.47828	5.20469	2.24139	58	Distal Intergenic	1	135764727	135779999	15273	1	Tnnt2	rna-NM_001130176.1	20310
chr1	135821449	135821706	258	*	A_WT_peak_855	28	3.81837	6.0515	2.89665	127	Intron (rna-NM_001313701.1/gene-Pkp1, intron 2 of 13)	1	135799132	135846945	47814	2	Pkp1	rna-NM_001313701.1	25239
chr1	135846767	135847062	296	*	A_WT_peak_856	43	4.47952	7.80321	4.36962	270	Promoter (<=1kb)	1	135799132	135846945	47814	2	Pkp1	rna-NM_001313701.1	0
chr1	135857954	135858175	222	*	A_WT_peak_857	24	3.61565	5.44901	2.41153	70	Distal Intergenic	1	135799132	135846945	47814	2	Pkp1	rna-NM_019645.3	-11009
chr1	135873291	135873463	173	*	A_WT_peak_858	33	3.85023	6.61778	3.35635	99	Distal Intergenic	1	135880943	135892667	11725	2	Igfn1	rna-XM_017319947.2	19204
chr1	135989833	135989988	156	*	A_WT_peak_859	29	3.57219	6.07025	2.9119	106	Intron (rna-XM_006529106.4/gene-Cacna1s, intron 2 of 43)	1	135980549	136047560	67012	1	Cacna1s	rna-NM_014193.3	9284
chr1	136022961	136023150	190	*	A_WT_peak_860	22	3.38824	5.25927	2.28386	18	Intron (rna-XM_006529106.4/gene-Cacna1s, intron 20 of 43)	1	136055457	136058921	3465	2	Gm15850	rna-NR_046167.1	35771
chr1	136047817	136048112	296	*	A_WT_peak_861	44	4.06306	7.85172	4.41225	113	Downstream (<=300bp)	1	136055457	136058921	3465	2	Gm15850	rna-NR_046167.1	10809
chr1	136058941	136059166	226	*	A_WT_peak_862	40	3.96977	7.38355	4.00544	157	Promoter (<=1kb)	1	136059128	136105739	46612	1	Kif21b	rna-NM_001039472.2	0
chr1	136101600	136101767	168	*	A_WT_peak_863	26	3.13694	5.78316	2.67895	146	Intron (rna-NM_001039472.2/gene-Kif21b, intron 34 of 34)	1	136109398	136140558	31161	2	Mroh3	rna-NM_001329610.2	38791
chr1	136153434	136153612	179	*	A_WT_peak_864	27	3.48024	5.88553	2.76116	67	Intron (rna-NM_028872.3/gene-Inava, intron 4 of 9)	1	136141266	136161479	20214	2	Inava	rna-XM_006529803.5	7867
chr1	136188670	136188863	194	*	A_WT_peak_865	45	4.2747	8.00216	4.54499	109	Promoter (<=1kb)	1	136186652	136188664	2013	2	Gpr25	rna-NM_001101516.2	-6
chr1	136268078	136268358	281	*	A_WT_peak_866	26	4.24285	5.76707	2.66575	22	Intron (rna-NM_001347109.1/gene-Camsap2, intron 1 of 17)	1	136195861	136273842	77982	2	Camsap2	rna-NM_001347109.1	5484
chr1	136273869	136274117	249	*	A_WT_peak_867	43	4.45003	7.74914	4.32293	110	Promoter (<=1kb)	1	136201610	136273855	72246	2	Camsap2	rna-XM_036153216.1	-14
chr1	136293130	136293344	215	*	A_WT_peak_868	22	3.71075	5.1524	2.20189	13	Distal Intergenic	1	136201610	136273855	72246	2	Camsap2	rna-XM_036153216.1	-19275
chr1	136316394	136316551	158	*	A_WT_peak_869	27	4.28588	5.83424	2.71957	11	Distal Intergenic	1	136343009	136367958	24950	1	Ddx59	rna-NM_026500.3	-26458
chr1	136342892	136343378	487	*	A_WT_peak_870	178	8.2545	22.4661	17.8665	76	Promoter (<=1kb)	1	136339654	136343257	3604	2	9230116N13Rik	rna-NR_024328.1	0
chr1	136380410	136380664	255	*	A_WT_peak_871	59	5.09573	9.58102	5.94181	134	Intron (rna-XM_006529842.5/gene-Ddx59, intron 7 of 7)	1	136394044	136457318	63275	1	Kif14	rna-XM_006529729.5	-13380
chr1	136393893	136394344	452	*	A_WT_peak_872	99	6.61206	13.9448	9.91951	68	Promoter (<=1kb)	1	136394044	136457318	63275	1	Kif14	rna-XM_006529729.5	0
chr1	136541133	136541455	323	*	A_WT_peak_873	42	4.56231	7.65245	4.23841	82	Distal Intergenic	1	136552639	136558129	5491	1	Zfp281	rna-NM_001160251.1	-11184
chr1	136552384	136552657	274	*	A_WT_peak_874	73	5.38027	11.1879	7.39476	134	Promoter (<=1kb)	1	136552639	136558129	5491	1	Zfp281	rna-NM_001160251.1	0
chr1	136572164	136572371	208	*	A_WT_peak_875	25	3.97523	5.58041	2.51558	52	Distal Intergenic	1	136578182	136589887	11706	2	Gm34056	rna-XR_387444.4	17516
chr1	136635202	136635373	172	*	A_WT_peak_876	49	4.86646	8.50127	4.98088	102	Intron (rna-NR_037986.1/gene-Platr22, intron 2 of 4)	1	136625112	136625209	98	1	Gm24086	gene-Gm24086	10090
chr1	136740683	136740903	221	*	A_WT_peak_877	14	3.42871	4.11687	1.48273	114	Distal Intergenic	1	136725926	136726697	772	2	Gm17781	gene-Gm17781	-13986
chr1	136986473	136986652	180	*	A_WT_peak_878	29	4.29348	6.08912	2.92747	51	Distal Intergenic	1	136917945	136918008	64	2	Rnu7-ps3	gene-Rnu7-ps3	-68465
chr1	138386311	138386582	272	*	A_WT_peak_879	30	4.53239	6.21905	3.02288	17	Distal Intergenic	1	138411575	138547495	135921	2	Nek7	rna-NM_001311148.1	160913
chr1	138444813	138444969	157	*	A_WT_peak_880	38	4.98563	7.18328	3.83141	29	Intron (rna-NM_001311148.1/gene-Nek7, intron 5 of 7)	1	138411575	138547495	135921	2	Nek7	rna-NM_001311148.1	102526
chr1	138466082	138466270	189	*	A_WT_peak_881	73	6.38264	11.086	7.30218	62	Intron (rna-NM_001311148.1/gene-Nek7, intron 3 of 7)	1	138411575	138547495	135921	2	Nek7	rna-NM_001311148.1	81225
chr1	138547326	138547521	196	*	A_WT_peak_882	44	4.87857	7.89033	4.44634	142	Promoter (<=1kb)	1	138411575	138547495	135921	2	Nek7	rna-NM_001311148.1	0
chr1	138784511	138784687	177	*	A_WT_peak_883	131	8.56061	17.3927	13.1151	109	Promoter (<=1kb)	1	138779717	138784592	4876	2	2310009B15Rik	rna-NM_001081226.1	0
chr1	139307015	139307615	601	*	A_WT_peak_884	24	4.04001	5.4501	2.41184	346	Promoter (<=1kb)	1	139307190	139330590	23401	1	4933436E23Rik	rna-NR_040455.1	0
chr1	139349874	139350275	402	*	A_WT_peak_885	32	4.41209	6.54056	3.29069	42	Promoter (<=1kb)	1	139349916	139380743	30828	1	Zbtb41	rna-XM_006529448.4	0
chr1	139382134	139382483	350	*	A_WT_peak_886	46	5.045	8.1682	4.69038	336	Promoter (<=1kb)	1	139382511	139421826	39316	1	Aspm	rna-NM_009791.4	-28
chr1	139382695	139383164	470	*	A_WT_peak_887	63	5.76571	10.0567	6.37012	210	Exon (rna-XM_017312957.3/gene-Aspm, exon 1 of 17)	1	139382511	139421826	39316	1	Aspm	rna-NM_009791.4	184
chr1	140153109	140153535	427	*	A_WT_peak_888	30	4.53239	6.21905	3.02288	80	Distal Intergenic	1	140173373	140537456	364084	1	Kcnt2	rna-XR_004942432.1	-19838
chr1	142176764	142176942	179	*	A_WT_peak_889	38	4.98563	7.18328	3.83141	5	Distal Intergenic	1	142382778	142383610	833	2	Gm18183	gene-Gm18183	206668
chr1	143498312	143498491	180	*	A_WT_peak_890	14	3.37171	4.03054	1.42337	10	Intron (rna-NM_145991.2/gene-Cdc73, intron 13 of 16)	1	143516435	143525675	9241	1	B3galt2	rna-NM_020025.4	-17944
chr1	143577902	143578590	689	*	A_WT_peak_891	91	6.38723	13.1067	9.14838	646	5' UTR	1	143510848	143578626	67779	2	Cdc73	rna-XM_006529366.4	36
chr1	143595654	143595973	320	*	A_WT_peak_892	25	4.15931	5.63662	2.56073	175	Intron (rna-XR_878588.2/gene-Gm38658, intron 2 of 2)	1	143594821	143597717	2897	1	Gm38658	rna-XR_878588.2	833
chr1	143652577	143653625	1049	*	A_WT_peak_893	123	6.84828	16.6112	12.389	166	Promoter (<=1kb)	1	143626528	143652789	26262	2	Ro60	rna-NM_013835.2	0
chr1	143879884	143880164	281	*	A_WT_peak_894	113	6.98141	15.5195	11.3753	134	Promoter (<=1kb)	1	143875076	143879887	4812	2	Rgs2	rna-NM_009061.4	0
chr1	145213432	145213838	407	*	A_WT_peak_895	47	5.43887	8.18462	4.70202	147	Distal Intergenic	1	145167092	145167218	127	2	Gm25460	rna-XR_004936835.1	-46214
chr1	148201284	148201487	204	*	A_WT_peak_896	30	4.53239	6.21905	3.02288	99	Distal Intergenic	1	148202718	148202846	129	2	Gm22966	rna-XR_004936834.1	1359
chr1	148908385	148908580	196	*	A_WT_peak_897	30	4.53239	6.21905	3.02288	40	Distal Intergenic	1	148851211	148855122	3912	1	Gm5703	gene-Gm5703	57174
chr1	148937993	148938189	197	*	A_WT_peak_898	47	5.43887	8.18462	4.70202	155	Distal Intergenic	1	148851211	148855122	3912	1	Gm5703	gene-Gm5703	86782
chr1	149500145	149500370	226	*	A_WT_peak_899	55	5.86932	9.18368	5.58716	157	Distal Intergenic	1	149583128	149583229	102	2	Gm23535	rna-XR_004936736.1	82859
chr1	149894318	149894500	183	*	A_WT_peak_900	22	4.07915	5.29532	2.28939	4	Distal Intergenic	1	149705369	149837041	131673	2	Pla2g4a	rna-NM_008869.4	-57277
chr1	150268464	150269104	641	*	A_WT_peak_901	278	9.99397	33.0665	27.8709	199	Promoter (<=1kb)	1	150237056	150268831	31776	2	Odr4	rna-NM_001357579.1	0
chr1	150290815	150291039	225	*	A_WT_peak_902	47	5.4372	8.18197	4.70202	46	Intron (rna-XM_006529065.4/gene-Tpr, intron 18 of 51)	1	150237056	150268831	31776	2	Odr4	rna-NM_001357579.1	-21984
chr1	150440666	150440845	180	*	A_WT_peak_903	22	4.07915	5.29532	2.28939	129	Intron (rna-XM_011248051.3/gene-Hmcn1, intron 96 of 96)	1	150431988	150434454	2467	2	Gm33818	gene-Gm33818	-6212
chr1	150761163	150761320	158	*	A_WT_peak_904	16	3.62591	4.41615	1.65115	21	Intron (rna-NM_001024720.3/gene-Hmcn1, intron 1 of 106)	1	150438251	150869186	430936	2	Hmcn1	rna-NM_001024720.3	107866
chr1	151134561	151134725	165	*	A_WT_peak_905	32	4.54542	6.4885	3.24672	59	Distal Intergenic	1	151117352	151127075	9724	2	Gm46162	rna-XR_001779479.2	-7486
chr1	151219861	151220259	399	*	A_WT_peak_906	112	6.07999	15.3983	11.2644	259	Promoter (<=1kb)	1	151220237	151240195	19959	1	Ivns1abp	rna-NM_001359262.1	0
chr1	151220429	151220919	491	*	A_WT_peak_907	17	3.03999	4.59214	1.78126	311	5' UTR	1	151220415	151240169	19755	1	Ivns1abp	rna-XM_030243144.1	14
chr1	151289304	151289468	165	*	A_WT_peak_908	22	4.07915	5.29532	2.28939	77	Intron (rna-XM_011248059.3/gene-Swt1, intron 4 of 17)	1	151243450	151304186	60737	2	Swt1	rna-NM_025819.4	14718
chr1	151303757	151304828	1072	*	A_WT_peak_909	196	7.96488	24.4071	19.6919	484	Promoter (<=1kb)	1	151243449	151304201	60753	2	Swt1	rna-XM_011248059.3	0
chr1	151376096	151376818	723	*	A_WT_peak_910	100	6.03891	14.076	10.0405	668	Promoter (<=1kb)	1	151345149	151376742	31594	2	Rnf2	rna-NM_001360844.1	0
chr1	151572888	151573058	171	*	A_WT_peak_911	25	3.99802	5.61705	2.54495	70	Intron (rna-NM_022018.3/gene-Niban1, intron 8 of 13)	1	151552923	151596791	43869	1	Niban1	rna-XM_006529776.5	19965
chr1	151575885	151576058	174	*	A_WT_peak_912	23	3.87578	5.42012	2.38848	89	Exon (rna-NM_022018.3/gene-Niban1, exon 9 of 14)	1	151552923	151596791	43869	1	Niban1	rna-XM_006529776.5	22962
chr1	151593672	151594026	355	*	A_WT_peak_913	41	4.87882	7.58577	4.18068	307	Exon (rna-NM_022018.3/gene-Niban1, exon 14 of 14)	1	151612577	151618379	5803	1	Gm41969	rna-XR_878602.3	-18551
chr1	151630699	151631155	457	*	A_WT_peak_914	158	7.47345	20.2844	15.8169	302	Promoter (<=1kb)	1	151624701	151630769	6069	2	2810414N06Rik	rna-NR_151473.1	0
chr1	151650657	151650971	315	*	A_WT_peak_915	43	4.98207	7.75417	4.32666	165	Intron (rna-XM_006529795.3/gene-Edem3, intron 4 of 20)	1	151631125	151698079	66955	1	Edem3	rna-NM_001311166.1	19532
chr1	151664771	151665012	242	*	A_WT_peak_916	27	4.17771	5.90471	2.7771	100	Intron (rna-XM_006529795.3/gene-Edem3, intron 8 of 20)	1	151631125	151698079	66955	1	Edem3	rna-NM_001311166.1	33646
chr1	151777450	151777664	215	*	A_WT_peak_917	20	3.83139	4.91345	2.02044	3	Intron (rna-NM_197990.3/gene-1700025G04Rik, intron 5 of 5)	1	151729670	151730771	1102	2	LOC118567811	rna-XR_004936426.1	-46679
chr1	151820446	151820611	166	*	A_WT_peak_918	22	3.76079	5.23382	2.26415	7	Intron (rna-NM_197990.3/gene-1700025G04Rik, intron 3 of 5)	1	151766599	151884333	117735	2	1700025G04Rik	rna-XM_036153473.1	63722
chr1	152261863	152262452	590	*	A_WT_peak_919	57	5.36888	9.38007	5.76183	138	Promoter (<=1kb)	1	152246486	152262433	15948	2	Tsen15	rna-NM_025677.3	0
chr1	152406682	152406989	308	*	A_WT_peak_920	18	3.44488	4.7158	1.87306	211	Intron (rna-NM_016846.4/gene-Rgl1, intron 14 of 17)	1	152415773	152424704	8932	1	Gm51749	rna-XR_003948739.1	-8784
chr1	152475814	152475974	161	*	A_WT_peak_921	17	3.34569	4.55098	1.75052	156	Intron (rna-NM_016846.4/gene-Rgl1, intron 2 of 17)	1	152393275	152468505	75231	2	Rgl1	rna-XM_006529267.5	-7309
chr1	152546691	152546843	153	*	A_WT_peak_922	19	3.79317	4.85459	1.97715	116	Intron (rna-NM_001346117.1/gene-Rgl1, intron 2 of 18)	1	152392513	152500968	108456	2	Rgl1	rna-NM_016846.4	-45723
chr1	152641709	152642454	746	*	A_WT_peak_923	75	5.29406	11.3778	7.5677	196	Promoter (<=1kb)	1	152642293	152651331	9039	1	Arpc5	rna-NM_026369.2	0
chr1	152777858	152778041	184	*	A_WT_peak_924	77	5.03878	11.5437	7.71775	54	5' UTR	1	152712848	152778242	65395	2	Smg7	rna-XM_036163992.1	201
chr1	152778282	152778829	548	*	A_WT_peak_925	64	4.72853	10.1853	6.48607	373	Promoter (<=1kb)	1	152712746	152778396	65651	2	Smg7	rna-NM_001160257.2	0
chr1	152779044	152779371	328	*	A_WT_peak_926	36	3.7604	6.9469	3.6353	107	Promoter (<=1kb)	1	152712848	152778875	66028	2	Smg7	rna-XM_036164011.1	-169
chr1	152980052	152980485	434	*	A_WT_peak_927	61	5.43126	9.83927	6.17455	84	Intron (rna-XR_387163.4/gene-Nmnat2, intron 8 of 11)	1	152998502	153061982	63481	2	Lamc2	rna-XM_011247926.3	81497
chr1	153061729	153062005	277	*	A_WT_peak_928	23	3.86504	5.40276	2.37425	221	Promoter (<=1kb)	1	152998502	153061982	63481	2	Lamc2	rna-XM_011247926.3	0
chr1	153148370	153148564	195	*	A_WT_peak_929	28	4.10268	6.03467	2.8829	48	Intron (rna-NM_010683.2/gene-Lamc1, intron 1 of 27)	1	153181102	153182437	1336	1	Gm8818	gene-Gm8818	-32538
chr1	153208732	153209306	575	*	A_WT_peak_930	85	5.6418	12.4635	8.55759	149	Promoter (<=1kb)	1	153094668	153208532	113865	2	Lamc1	rna-NM_010683.2	-200
chr1	153300839	153301323	485	*	A_WT_peak_931	43	4.48943	7.82136	4.38582	272	Promoter (<=1kb)	1	153300846	153314663	13818	1	Shcbp1l	rna-XM_036153690.1	0
chr1	153328854	153329036	183	*	A_WT_peak_932	17	3.25887	4.6048	1.7904	131	Distal Intergenic	1	153315825	153315964	140	1	Gm25588	rna-XR_004936764.1	13029
chr1	153355748	153355905	158	*	A_WT_peak_933	34	4.32784	6.67409	3.4032	113	Intron (rna-XM_011247918.4/gene-Dhx9, intron 4 of 27)	1	153331504	153363406	31903	2	Dhx9	rna-NM_007842.2	7501
chr1	153378030	153378191	162	*	A_WT_peak_934	13	3.19776	3.93387	1.35625	7	Distal Intergenic	1	153331559	153363464	31906	2	Dhx9	rna-XM_030246403.2	-14566
chr1	153395910	153396070	161	*	A_WT_peak_935	25	3.99802	5.61705	2.54495	70	Intron (rna-NM_028749.1/gene-Npl, intron 6 of 11)	1	153378762	153425460	46699	2	Npl	rna-NM_028749.1	29390
chr1	153425282	153425497	216	*	A_WT_peak_936	35	4.61278	6.86512	3.56595	186	Promoter (<=1kb)	1	153378762	153425460	46699	2	Npl	rna-NM_028749.1	0
chr1	153605673	153606100	428	*	A_WT_peak_937	41	4.66075	7.52302	4.12651	59	Intron (rna-NR_046171.1/gene-C230024C17Rik, intron 2 of 2)	1	153596986	153613575	16590	2	C230024C17Rik	rna-NR_046171.1	7475
chr1	153762136	153762452	317	*	A_WT_peak_938	24	4.10543	5.55242	2.49373	189	Distal Intergenic	1	153767392	153768806	1415	1	Teddm1a	rna-NM_178244.3	-4940
chr1	153775389	153775992	604	*	A_WT_peak_939	45	4.25874	7.97026	4.51639	374	Promoter (<=1kb)	1	153775675	153785469	9795	1	Glul	rna-NM_008131.4	0
chr1	153910257	153910606	350	*	A_WT_peak_940	32	4.21709	6.48754	3.24629	43	Intron (rna-NR_168298.1/gene-LOC108167736, intron 3 of 3)	1	153939444	153988655	49212	1	Gm46165	rna-XR_001779496.2	-28838
chr1	153941473	153941687	215	*	A_WT_peak_941	31	4.29984	6.35789	3.13798	165	Intron (rna-XR_001779496.2/gene-Gm46165, intron 1 of 3)	1	153939444	153988655	49212	1	Gm46165	rna-XR_001779496.2	2029
chr1	154078539	154078723	185	*	A_WT_peak_942	31	4.32429	6.39775	3.17047	126	Intron (rna-NM_001204908.2/gene-Zfp648, intron 1 of 1)	1	154067560	154079758	12199	2	Gm30388	rna-XR_387486.5	1035
chr1	154509435	154509595	161	*	A_WT_peak_943	16	3.5737	4.33679	1.63654	4	Exon (rna-XM_030244154.2/gene-Cacna1e, exon 6 of 46)	1	154268265	154601666	333402	2	Cacna1e	rna-NM_009782.3	92071
chr1	154760901	154761074	174	*	A_WT_peak_944	13	3.20675	3.94788	1.36537	126	Promoter (<=1kb)	1	154266552	154760374	493823	2	Cacna1e	rna-XM_030243929.1	-527
chr1	154926385	154926598	214	*	A_WT_peak_945	24	3.8146	5.55596	2.49646	79	Promoter (2-3kb)	1	154916484	154923613	7130	2	Gm41979	rna-XR_878637.3	-2772
chr1	154935882	154936070	189	*	A_WT_peak_946	17	3.23806	4.56835	1.76323	86	Exon (rna-XR_001779499.2/gene-Gm41980, exon 1 of 6)	1	154897528	154936080	38553	2	Gm41980	rna-XR_001779499.2	10
chr1	154959062	154959359	298	*	A_WT_peak_947	58	4.86786	9.48385	5.85467	44	Promoter (<=1kb)	1	154939193	154959010	19818	2	Gm9530	rna-NR_151545.1	-52
chr1	154975347	154975554	208	*	A_WT_peak_948	76	5.33457	11.4608	7.64261	116	Promoter (<=1kb)	1	154972113	154975382	3270	2	Ier5	rna-NM_010500.2	0
chr1	155034068	155034568	501	*	A_WT_peak_949	132	7.33245	17.5888	13.2982	218	Promoter (<=1kb)	1	155034374	155083405	49032	1	Stx6	rna-XM_006529766.5	0
chr1	155102413	155102587	175	*	A_WT_peak_950	14	2.86705	4.07795	1.45607	99	Intron (rna-XM_036163046.1/gene-BC034090, intron 1 of 7)	1	155088217	155105881	17665	2	BC034090	rna-XM_036163046.1	3294
chr1	155157009	155157550	542	*	A_WT_peak_951	29	4.00201	6.12144	2.95412	497	Intron (rna-NM_011273.2/gene-Xpr1, intron 14 of 14)	1	155123504	155132597	9094	1	Gm31102	rna-XR_387500.5	33505
chr1	155292679	155293343	665	*	A_WT_peak_952	109	5.90794	15.0101	10.9039	446	Promoter (<=1kb)	1	155151403	155293190	141788	2	Xpr1	rna-NM_011273.2	0
chr1	155386767	155386964	198	*	A_WT_peak_953	28	4.25418	6.0266	2.87571	116	Distal Intergenic	1	155395919	155402857	6939	2	Gm5532	rna-NR_132128.1	15893
chr1	155488206	155488450	245	*	A_WT_peak_954	20	3.83139	4.91345	2.02044	60	Intron (rna-XR_387197.5/gene-Acbd6, intron 4 of 6)	1	155471726	155564120	92395	1	Acbd6	rna-XM_006529883.5	16480
chr1	155590719	155590965	247	*	A_WT_peak_955	41	4.34516	7.55573	4.15513	128	Intron (rna-XM_006529169.3/gene-Lhx4, intron 2 of 5)	1	155577438	155617773	40336	2	Lhx4	rna-NM_010712.2	26808
chr1	155600901	155601120	220	*	A_WT_peak_956	28	4.04809	5.94458	2.80957	14	Intron (rna-XM_006529169.3/gene-Lhx4, intron 1 of 5)	1	155577438	155617773	40336	2	Lhx4	rna-NM_010712.2	16653
chr1	155718949	155719184	236	*	A_WT_peak_957	77	6.22114	11.5931	7.76248	87	Distal Intergenic	1	155739798	155741344	1547	1	Gm36934	gene-Gm36934	-20614
chr1	155797171	155797593	423	*	A_WT_peak_958	29	4.29348	6.08912	2.92747	99	Intron (rna-XM_006529900.5/gene-Cep350, intron 15 of 38)	1	155770499	155775991	5493	1	Gm51652	rna-XR_003948064.2	26672
chr1	155804342	155804528	187	*	A_WT_peak_959	13	3.29502	3.91446	1.34341	106	Exon (rna-XM_006529900.5/gene-Cep350, exon 12 of 39)	1	155830320	155830419	100	1	Gm23744	gene-Gm23744	-25792
chr1	155848644	155849437	794	*	A_WT_peak_960	103	6.2166	14.444	10.3815	444	Promoter (<=1kb)	1	155720710	155848951	128242	2	Cep350	rna-XM_006529900.5	0
chr1	155874160	155874365	206	*	A_WT_peak_961	23	3.85435	5.38549	2.36033	115	Distal Intergenic	1	155860545	155862050	1506	1	LOC118567848	rna-XR_004936516.1	13615
chr1	155879336	155879673	338	*	A_WT_peak_962	73	6.1611	11.1001	7.31501	222	Distal Intergenic	1	155895790	155904861	9072	1	Gm51653	rna-XR_004936521.1	-16117
chr1	155911362	155911533	172	*	A_WT_peak_963	22	3.25714	5.21931	2.25268	47	Promoter (<=1kb)	1	155911410	155944607	33198	1	Tor1aip2	rna-NM_172843.4	0
chr1	155911847	155912262	416	*	A_WT_peak_964	52	4.22021	8.76093	5.21082	251	Promoter (<=1kb)	1	155880345	155912226	31882	2	Tor1aip1	rna-NM_001160018.1	0
chr1	156130347	156130570	224	*	A_WT_peak_965	24	3.95269	5.54414	2.4872	177	Promoter (<=1kb)	1	156082866	156130038	47173	2	Tdrd5	rna-XM_006496734.1	-309
chr1	156149323	156149615	293	*	A_WT_peak_966	25	4.15931	5.63662	2.56073	160	Intron (rna-XM_006496683.4/gene-Nphs2, intron 5 of 6)	1	156144393	156155604	11212	1	Nphs2	rna-XM_006496684.3	4930
chr1	156248606	156248776	171	*	A_WT_peak_967	46	4.8288	8.11755	4.64641	109	Promoter (<=1kb)	1	156157985	156248743	90759	2	Axdnd1	rna-XM_030243577.2	0
chr1	156327520	156327683	164	*	A_WT_peak_968	14	3.28052	4.06265	1.44555	122	Exon (rna-XR_865658.1/gene-Gm39682, exon 3 of 3)	1	156304129	156327774	23646	1	Gm39682	rna-XR_865657.1	23391
chr1	156386180	156386835	656	*	A_WT_peak_969	83	5.71736	12.2309	8.34523	169	Promoter (<=1kb)	1	156386357	156477189	90833	1	Abl2	rna-NM_001136104.1	0
chr1	156393948	156394393	446	*	A_WT_peak_970	42	4.76078	7.69225	4.27242	349	Intron (rna-XM_006496615.4/gene-Abl2, intron 1 of 10)	1	156386357	156477189	90833	1	Abl2	rna-NM_009595.3	7591
chr1	156432476	156432746	271	*	A_WT_peak_971	43	4.83866	7.82337	4.38753	88	Intron (rna-XM_006496615.4/gene-Abl2, intron 1 of 10)	1	156441415	156477138	35724	1	Abl2	rna-XM_006496613.5	-8669
chr1	156494524	156494718	195	*	A_WT_peak_972	15	3.24391	4.18868	1.53216	38	Intron (rna-NM_023141.2/gene-Tor3a, intron 3 of 5)	1	156481187	156501909	20723	2	Tor3a	rna-NM_023141.2	7191
chr1	156501624	156501799	176	*	A_WT_peak_973	17	3.36995	4.59139	1.78075	128	Exon (rna-NM_023141.2/gene-Tor3a, exon 1 of 6)	1	156481187	156501909	20723	2	Tor3a	rna-NM_023141.2	110
chr1	156546039	156546819	781	*	A_WT_peak_974	132	6.46559	17.5542	13.2657	728	Promoter (<=1kb)	1	156506115	156546361	40247	2	Fam20b	rna-XM_006496737.4	0
chr1	156566410	156566569	160	*	A_WT_peak_975	30	3.91094	6.21794	3.02288	122	Distal Intergenic	1	156571974	156580831	8858	1	Gm39683	rna-XR_865660.1	-5405
chr1	156585359	156585516	158	*	A_WT_peak_976	52	5.04815	8.82234	5.26583	79	Distal Intergenic	1	156576444	156580831	4388	1	Gm39683	rna-XR_865659.1	8915
chr1	156624751	156624914	164	*	A_WT_peak_977	30	4.53239	6.21905	3.02288	38	Distal Intergenic	1	156621036	156621939	904	1	Gm15428	gene-Gm15428	3715
chr1	156642736	156642992	257	*	A_WT_peak_978	33	4.31651	6.65505	3.38757	4	Intron (rna-XM_036154413.1/gene-Ralgps2, intron 10 of 12)	1	156621036	156621939	904	1	Gm15428	gene-Gm15428	21700
chr1	156689427	156689666	240	*	A_WT_peak_979	43	5.01238	7.80349	4.36978	97	Intron (rna-XM_030243667.1/gene-Ralgps2, intron 9 of 19)	1	156666593	156688648	22056	1	Angptl1	rna-NM_028333.2	22834
chr1	156920169	156920372	204	*	A_WT_peak_980	28	4.2156	5.96514	2.82577	11	Distal Intergenic	1	156887031	156909201	22171	2	Gm30568	rna-XR_373631.2	-10968
chr1	156937457	156937633	177	*	A_WT_peak_981	19	3.49672	4.80149	1.93679	77	5' UTR	1	156926711	156938506	11796	2	Tex35	rna-XM_036153771.1	873
chr1	156962406	156962572	167	*	A_WT_peak_982	62	5.2602	9.88451	6.21515	125	Distal Intergenic	1	156948525	156957555	9031	1	Gm30694	rna-NR_165831.1	13881
chr1	156984625	156984989	365	*	A_WT_peak_983	26	4.2571	5.78931	2.68317	117	Exon (rna-NM_177644.5/gene-Rasal2, exon 14 of 18)	1	156948525	156957555	9031	1	Gm30694	rna-NR_165831.1	36100
chr1	157044038	157044232	195	*	A_WT_peak_984	33	4.62073	6.60753	3.34702	4	Intron (rna-NM_177644.5/gene-Rasal2, intron 4 of 17)	1	156962759	157058801	96043	2	Rasal2	rna-XM_036164037.1	14569
chr1	157164679	157164891	213	*	A_WT_peak_985	22	4.07915	5.29532	2.28939	184	Intron (rna-NM_177644.5/gene-Rasal2, intron 1 of 17)	1	157239922	157247806	7885	1	2810025M15Rik	rna-NR_027984.1	-75031
chr1	157239502	157240336	835	*	A_WT_peak_986	68	5.43957	10.5729	6.83662	250	Promoter (<=1kb)	1	157239922	157247806	7885	1	2810025M15Rik	rna-NR_027984.1	0
chr1	157327900	157328587	688	*	A_WT_peak_987	23	3.53802	5.31131	2.30169	140	Intron (rna-NR_151610.1/gene-Gm15486, intron 2 of 2)	1	157334303	157379930	45628	1	Sec16b	rna-XM_036154461.1	-5716
chr1	157388289	157388714	426	*	A_WT_peak_988	22	3.93956	5.29278	2.28939	112	Exon (rna-XM_006497049.2/gene-Sec16b, exon 21 of 28)	1	157417365	157422277	4913	2	Gm30903	rna-XR_373636.2	33563
chr1	157415806	157415959	154	*	A_WT_peak_989	17	3.56778	4.50726	1.71836	51	Distal Intergenic	1	157417365	157422277	4913	2	Gm30903	rna-XR_373636.2	6318
chr1	158280100	158280737	638	*	A_WT_peak_990	78	6.27245	11.6817	7.84323	248	Intron (rna-XM_036155415.1/gene-Astn1, intron 1 of 15)	1	158333195	158333303	109	1	Mir488	rna-NR_030441.1	-52458
chr1	158763982	158764352	371	*	A_WT_peak_991	27	4.31506	5.87978	2.75647	145	Exon (rna-XM_006496824.5/gene-Pappa2, exon 4 of 24)	1	158539303	158785745	246443	2	Pappa2	rna-NM_001085376.3	21393
chr1	159059717	159059918	202	*	A_WT_peak_992	30	4.26368	6.29885	3.08903	81	Promoter (<=1kb)	1	159059734	159182442	122709	1	Cop1	rna-XR_004942526.1	0
chr1	159099771	159099959	189	*	A_WT_peak_993	30	4.53239	6.21905	3.02288	29	Intron (rna-XR_004942526.1/gene-Cop1, intron 8 of 20)	1	159121343	159121736	394	1	Pou5f1-rs1	rna-NR_144489.1	-21384
chr1	159434416	159434669	254	*	A_WT_peak_994	20	3.81856	4.8937	2.00626	45	Promoter (1-2kb)	1	159436335	159759299	322965	1	Tnr	rna-XM_030252974.2	-1666
chr1	159502122	159502333	212	*	A_WT_peak_995	14	3.42871	4.11687	1.48273	117	Intron (rna-XM_006496745.5/gene-Tnr, intron 1 of 21)	1	159517907	159759299	241393	1	Tnr	rna-XM_006496743.4	-15574
chr1	160022551	160023040	490	*	A_WT_peak_996	217	8.92405	26.6028	21.7617	252	Promoter (<=1kb)	1	160022785	160028756	5972	1	Mrps14	rna-NM_025474.4	0
chr1	160040004	160040936	933	*	A_WT_peak_997	118	6.58476	16.0645	11.8834	584	Promoter (<=1kb)	1	160029937	160040462	10526	2	Cacybp	rna-NM_009786.2	0
chr1	160198025	160198210	186	*	A_WT_peak_998	25	4.14571	5.61537	2.5444	161	Intron (rna-XM_006496877.3/gene-Rabgap1l, intron 18 of 25)	1	160079836	160185388	105553	2	Rabgap1l	rna-XM_030254805.1	-12637
chr1	160473679	160473839	161	*	A_WT_peak_999	28	4.4204	6.04418	2.89053	17	Intron (rna-XM_006496877.3/gene-Rabgap1l, intron 11 of 25)	1	160473143	160473274	132	1	Gm23528	rna-XR_004936791.1	536
chr1	160489199	160489362	164	*	A_WT_peak_1000	30	4.53239	6.21905	3.02288	76	Intron (rna-XM_006496877.3/gene-Rabgap1l, intron 11 of 25)	1	160473143	160473274	132	1	Gm23528	rna-XR_004936791.1	16056
chr1	160506364	160506768	405	*	A_WT_peak_1001	20	3.81856	4.8937	2.00626	131	Intron (rna-XM_006496877.3/gene-Rabgap1l, intron 11 of 25)	1	160473143	160473274	132	1	Gm23528	rna-XR_004936791.1	33221
chr1	160531501	160531800	300	*	A_WT_peak_1002	42	5.12573	7.68624	4.26732	91	Intron (rna-XM_006496877.3/gene-Rabgap1l, intron 8 of 25)	1	160473143	160473274	132	1	Gm23528	rna-XR_004936791.1	58358
chr1	160578596	160578825	230	*	A_WT_peak_1003	24	4.07901	5.51111	2.46042	127	Intron (rna-XM_006496877.3/gene-Rabgap1l, intron 1 of 25)	1	160619465	160628226	8762	1	Gm37083	rna-XR_003948749.1	-40640
chr1	160620004	160620259	256	*	A_WT_peak_1004	27	3.88868	5.92629	2.79418	1	Intron (rna-XR_003948749.1/gene-Gm37083, intron 1 of 2)	1	160046744	160620495	573752	2	Rabgap1l	rna-XM_006496877.3	236
chr1	160620416	160620689	274	*	A_WT_peak_1005	40	4.43462	7.42649	4.04219	50	Promoter (<=1kb)	1	160046744	160620495	573752	2	Rabgap1l	rna-XM_006496877.3	0
chr1	160626745	160626903	159	*	A_WT_peak_1006	25	4.18679	5.67954	2.5952	83	Exon (rna-XR_003948749.1/gene-Gm37083, exon 2 of 3)	1	160046744	160621046	574303	2	Rabgap1l	rna-XM_006496875.1	-5699
chr1	160733623	160734490	868	*	A_WT_peak_1007	99	5.78443	13.9345	9.91023	729	Promoter (<=1kb)	1	160733981	160802546	68566	1	Rc3h1	rna-NM_001024952.2	0
chr1	160782361	160782703	343	*	A_WT_peak_1008	59	5.71399	9.61275	5.97047	232	Exon (rna-NM_001024952.2/gene-Rc3h1, exon 12 of 20)	1	160806153	160830110	23958	1	Serpinc1	rna-NM_001379302.1	-23450
chr1	160862102	160862745	644	*	A_WT_peak_1009	319	9.34851	37.3057	31.9093	414	Promoter (<=1kb)	1	160862171	160866109	3939	1	Gas5	rna-NR_166052.1	0
chr1	160897875	160898433	559	*	A_WT_peak_1010	51	4.81263	8.72565	5.17912	464	Promoter (<=1kb)	1	160898337	160914294	15958	1	Cenpl	rna-NM_001159930.2	0
chr1	160929252	160929461	210	*	A_WT_peak_1011	29	4.49884	6.16665	2.99104	35	Intron (rna-XM_036164066.1/gene-Klhl20, intron 6 of 11)	1	160915948	160959049	43102	2	Klhl20	rna-NM_001039482.1	29588
chr1	160954110	160954287	178	*	A_WT_peak_1012	62	5.50058	9.96121	6.28408	43	Intron (rna-XM_036164066.1/gene-Klhl20, intron 2 of 11)	1	160915948	160959049	43102	2	Klhl20	rna-NM_001039482.1	4762
chr1	160958535	160958902	368	*	A_WT_peak_1013	17	3.36995	4.59139	1.78075	111	Intron (rna-XM_036164066.1/gene-Klhl20, intron 1 of 11)	1	160915948	160959049	43102	2	Klhl20	rna-NM_001039482.1	147
chr1	161549666	161549942	277	*	A_WT_peak_1014	30	4.53239	6.21905	3.02288	30	Distal Intergenic	1	161553105	161555260	2156	2	Gm15429	gene-Gm15429	5318
chr1	161704237	161704847	611	*	A_WT_peak_1015	188	8.25009	23.5013	18.8411	247	Promoter (<=1kb)	1	161643681	161704251	60571	2	Suco	rna-NM_001357401.1	0
chr1	161796666	161797025	360	*	A_WT_peak_1016	88	6.19402	12.749	8.81915	166	Promoter (<=1kb)	1	161769658	161796717	27060	2	4930558K02Rik	rna-NM_001204905.1	0
chr1	161803883	161804139	257	*	A_WT_peak_1017	39	4.71143	7.31132	3.94296	225	Intron (rna-NM_001204904.1/gene-4930558K02Rik, intron 1 of 6)	1	161769658	161807205	37548	2	4930558K02Rik	rna-NM_001204904.1	3066
chr1	161907542	161907737	196	*	A_WT_peak_1018	22	4.07915	5.29532	2.28939	130	Intron (rna-XR_004942603.1/gene-Dnm3, intron 15 of 18)	1	161832538	161844054	11517	1	2810442N19Rik	rna-NR_040562.1	75004
chr1	161986793	161986992	200	*	A_WT_peak_1019	16	3.62591	4.41615	1.65115	73	Intron (rna-XR_004942603.1/gene-Dnm3, intron 13 of 18)	1	162045192	162053119	7928	1	Dnm3os	rna-NR_002870.2	-58200
chr1	162064438	162064879	442	*	A_WT_peak_1020	42	4.93729	7.68122	4.26287	153	Intron (rna-XR_004942603.1/gene-Dnm3, intron 12 of 18)	1	162051007	162051028	22	1	rna-NR_029796.1	rna-Mir214-2	13431
chr1	162070733	162070894	162	*	A_WT_peak_1021	20	3.89682	5.01422	2.09687	4	Intron (rna-XR_004942603.1/gene-Dnm3, intron 12 of 18)	1	162051007	162051028	22	1	rna-NR_029796.1	rna-Mir214-2	19726
chr1	162219075	162219284	210	*	A_WT_peak_1022	30	4.53239	6.21905	3.02288	164	Intron (rna-XR_004942603.1/gene-Dnm3, intron 2 of 18)	1	162207871	162213660	5790	1	Gm39688	rna-XR_865682.2	11204
chr1	162357327	162357480	154	*	A_WT_peak_1023	38	4.9841	7.18087	3.83141	80	Distal Intergenic	1	162361240	162375914	14675	2	Eef1aknmt	rna-NM_144877.1	18434
chr1	162375908	162376182	275	*	A_WT_peak_1024	35	4.26839	6.84892	3.55191	187	Promoter (<=1kb)	1	162361240	162375914	14675	2	Eef1aknmt	rna-NM_144877.1	0
chr1	162398000	162398536	537	*	A_WT_peak_1025	99	5.99322	13.9806	9.95229	218	Promoter (<=1kb)	1	162398084	162426651	28568	1	Vamp4	rna-NM_001356526.1	0
chr1	162406878	162407082	205	*	A_WT_peak_1026	27	4.14049	5.84529	2.72856	128	Intron (rna-NM_001356526.1/gene-Vamp4, intron 3 of 7)	1	162398397	162426651	28255	1	Vamp4	rna-NM_001347125.1	8481
chr1	162455393	162455556	164	*	A_WT_peak_1027	14	3.42871	4.11687	1.48273	6	Exon (gene-Gm5705/gene-Gm5705, exon 1 of 1)	1	162455038	162456655	1618	2	Gm5705	gene-Gm5705	1099
chr1	162567439	162567699	261	*	A_WT_peak_1028	34	4.07358	6.77518	3.48916	114	Intron (rna-XM_006496766.5/gene-Prrc2c, intron 1 of 34)	1	162499722	162568116	68395	2	Prrc2c	rna-XM_006496768.5	417
chr1	162567886	162568243	358	*	A_WT_peak_1029	72	5.49026	11.0345	7.25574	299	Promoter (<=1kb)	1	162499354	162568124	68771	2	Prrc2c	rna-XM_006496766.5	0
chr1	162582136	162582977	842	*	A_WT_peak_1030	45	5.30448	7.97081	4.51681	184	Distal Intergenic	1	162499354	162568125	68772	2	Prrc2c	rna-NM_001081290.1	-14011
chr1	162707931	162708255	325	*	A_WT_peak_1031	29	4.48293	6.1418	2.97063	209	Exon (rna-NM_001360913.1/gene-Fmo2, exon 6 of 8)	1	162700259	162701191	933	1	Gm32197	rna-XR_001779516.3	7672
chr1	163231109	163231574	466	*	A_WT_peak_1032	153	9.08642	19.8367	15.397	217	Promoter (<=1kb)	1	163212472	163231238	18767	2	Gorab	rna-NM_001313738.1	0
chr1	163451941	163452114	174	*	A_WT_peak_1033	16	3.62591	4.41615	1.65115	111	Distal Intergenic	1	163365303	163445476	80174	2	Gm32333	rna-XR_373658.2	-6465
chr1	163464218	163464507	290	*	A_WT_peak_1034	30	4.53239	6.21905	3.02288	86	Intron (rna-XR_004936666.1/gene-LOC118567861, intron 2 of 2)	1	163453953	163467668	13716	2	LOC118567861	rna-XR_004936666.1	3161
chr1	163474336	163474743	408	*	A_WT_peak_1035	35	4.74657	6.80618	3.51508	216	Distal Intergenic	1	163473777	163473919	143	1	LOC115487660	rna-XR_004936785.1	559
chr1	163557887	163558095	209	*	A_WT_peak_1036	38	4.98563	7.18328	3.83141	43	Exon (gene-Gm2343/gene-Gm2343, exon 1 of 1)	1	163557139	163558300	1162	1	Gm2343	gene-Gm2343	748
chr1	163607065	163607551	487	*	A_WT_peak_1037	199	11.2302	24.6436	19.9148	137	Promoter (<=1kb)	1	163589957	163607109	17153	2	Gm51663	rna-NR_165475.1	0
chr1	163822123	163822851	729	*	A_WT_peak_1038	87	6.63917	12.7227	8.79568	281	Promoter (<=1kb)	1	163773409	163822377	48969	2	BC055324	rna-XM_006496909.5	0
chr1	164061180	164061354	175	*	A_WT_peak_1039	38	4.96635	7.15287	3.81114	96	Distal Intergenic	1	164076615	164092954	16340	1	Slc19a2	rna-NM_001276455.1	-15261
chr1	164076175	164076612	438	*	A_WT_peak_1040	78	5.4599	11.7157	7.87476	288	Promoter (<=1kb)	1	164076615	164092954	16340	1	Slc19a2	rna-NM_001276455.1	-3
chr1	164103122	164103506	385	*	A_WT_peak_1041	53	5.53258	8.97115	5.39856	352	Promoter (<=1kb)	1	164103126	164115416	12291	1	Ccdc181	rna-XM_036154044.1	0
chr1	164134598	164134820	223	*	A_WT_peak_1042	25	3.84352	5.6044	2.53502	203	5' UTR	1	164117369	164135053	17685	2	Blzf1	rna-NM_001160208.1	233
chr1	164135065	164135338	274	*	A_WT_peak_1043	67	5.58192	10.4679	6.74183	186	Promoter (<=1kb)	1	164135091	164264869	129779	1	Nme7	rna-XM_006496692.4	0
chr1	164163756	164163924	169	*	A_WT_peak_1044	16	3.4284	4.29191	1.6052	4	Intron (rna-XM_006496692.4/gene-Nme7, intron 4 of 12)	1	164151869	164264869	113001	1	Nme7	rna-XM_030251921.2	11887
chr1	164296204	164296393	190	*	A_WT_peak_1045	17	3.63601	4.61248	1.79604	177	Distal Intergenic	1	164301062	164301689	628	1	Gm39691	rna-XR_865695.2	-4669
chr1	164371887	164372044	158	*	A_WT_peak_1046	18	3.71898	4.74033	1.89158	6	Distal Intergenic	1	164330876	164342451	11576	1	Gm26685	rna-NR_151593.1	41011
chr1	164427072	164427366	295	*	A_WT_peak_1047	80	6.39552	11.8935	8.03791	124	Distal Intergenic	1	164459336	164486578	27243	1	LOC118567862	rna-XR_004936667.1	-31970
chr1	164937895	164938052	158	*	A_WT_peak_1048	41	5.02415	7.5243	4.12764	135	Distal Intergenic	1	164894186	164919499	25314	2	4930568G15Rik	rna-NR_040480.1	-18396
chr1	164989836	164989994	159	*	A_WT_peak_1049	23	4.00174	5.39021	2.36417	13	Promoter (1-2kb)	1	164965422	164988342	22921	2	Tbx19	rna-NM_032005.4	-1494
chr1	165016964	165017148	185	*	A_WT_peak_1050	42	4.54052	7.61404	4.20498	57	Intron (rna-NM_145512.4/gene-Sft2d2, intron 1 of 7)	1	165001910	165022002	20093	2	Sft2d2	rna-NM_145512.4	4854
chr1	165032304	165032456	153	*	A_WT_peak_1051	34	4.36221	6.73172	3.45187	91	Distal Intergenic	1	165001910	165022104	20195	2	Sft2d2	rna-XR_001784762.3	-10200
chr1	165064066	165064796	731	*	A_WT_peak_1052	162	7.9423	20.7857	16.2866	530	Promoter (<=1kb)	1	165039855	165064527	24673	2	Tiprl	rna-NM_145513.4	0
chr1	165229513	165229712	200	*	A_WT_peak_1053	22	3.99228	5.16131	2.20837	8	Intron (rna-NM_028759.1/gene-Dcaf6, intron 6 of 18)	1	165268194	165268278	85	1	Gm24637	gene-Gm24637	-38482
chr1	165268544	165268710	167	*	A_WT_peak_1054	29	4.13615	6.08977	2.92774	30	Intron (rna-NM_028759.1/gene-Dcaf6, intron 1 of 18)	1	165268194	165268278	85	1	Gm24637	gene-Gm24637	350
chr1	165287877	165288854	978	*	A_WT_peak_1055	249	7.75986	30.0047	24.97	758	Promoter (<=1kb)	1	165157069	165288032	130964	2	Dcaf6	rna-NM_028759.1	0
chr1	165430956	165431205	250	*	A_WT_peak_1056	25	3.96393	5.56223	2.50184	242	Exon (rna-XR_004934160.1/gene-Mpzl1, exon 4 of 6)	1	165419745	165462110	42366	2	Mpzl1	rna-NM_001347128.1	30905
chr1	165461995	165462475	481	*	A_WT_peak_1057	190	7.88567	23.709	19.0361	267	Promoter (<=1kb)	1	165419745	165462110	42366	2	Mpzl1	rna-NM_001347128.1	0
chr1	165470277	165470587	311	*	A_WT_peak_1058	83	5.72911	12.2541	8.36636	189	Promoter (<=1kb)	1	165469840	165469911	72	2	n-TPcgg2	rna-n-TPcgg2	-366
chr1	165485785	165485962	178	*	A_WT_peak_1059	30	4.08131	6.25704	3.05474	18	Intron (rna-XM_011238794.2/gene-Rcsd1, intron 5 of 7)	1	165469840	165469911	72	2	n-TPcgg2	rna-n-TPcgg2	-15874
chr1	165513801	165514008	208	*	A_WT_peak_1060	32	4.54542	6.4885	3.24672	170	Intron (rna-XM_011238794.2/gene-Rcsd1, intron 1 of 7)	1	165476514	165535663	59150	2	Rcsd1	rna-NM_001038846.1	21655
chr1	165599108	165599274	167	*	A_WT_peak_1061	28	4.06975	5.98036	2.83834	158	Intron (rna-NM_011804.3/gene-Creg1, intron 3 of 3)	1	165591327	165602878	11552	1	Creg1	rna-NR_149310.1	7781
chr1	165611549	165611711	163	*	A_WT_peak_1062	13	3.12399	3.99452	1.39839	55	Intron (rna-XM_011238745.4/gene-Cd247, intron 5 of 12)	1	165608620	165689638	81019	1	Cd247	rna-XM_036156498.1	2929
chr1	165629743	165629896	154	*	A_WT_peak_1063	17	3.62445	4.59467	1.78239	153	Intron (rna-XM_011238745.4/gene-Cd247, intron 6 of 12)	1	165637205	165637311	107	2	Gm23402	rna-XR_004936891.1	7415
chr1	165685707	165686121	415	*	A_WT_peak_1064	20	3.35779	4.9879	2.07732	412	Exon (rna-XM_011238745.4/gene-Cd247, exon 10 of 13)	1	165672572	165676714	4143	2	Gm32999	rna-XR_003948764.2	-8993
chr1	165695376	165695627	252	*	A_WT_peak_1065	29	4.33351	6.15274	2.97975	139	3' UTR	1	165672572	165676714	4143	2	Gm32999	rna-XR_003948764.2	-18662
chr1	165719227	165719408	182	*	A_WT_peak_1066	21	3.83236	5.12448	2.18053	3	Exon (rna-XM_017319360.3/gene-Pou2f1, exon 14 of 17)	1	165672572	165676714	4143	2	Gm32999	rna-XR_003948764.2	-42513
chr1	165812755	165812923	169	*	A_WT_peak_1067	19	3.79317	4.85459	1.97715	132	Intron (rna-XM_036162785.1/gene-Pou2f1, intron 1 of 17)	1	165692719	165802814	110096	2	Pou2f1	rna-XM_017319360.3	-9941
chr1	165829134	165829540	407	*	A_WT_peak_1068	51	3.94108	8.67296	5.13201	254	Intron (rna-XM_036162785.1/gene-Pou2f1, intron 1 of 17)	1	165692719	165830198	137480	2	Pou2f1	rna-XM_036162785.1	658
chr1	165830246	165831049	804	*	A_WT_peak_1069	162	6.4938	20.704	16.2098	103	Promoter (<=1kb)	1	165692719	165830318	137600	2	Pou2f1	rna-XR_373598.2	0
chr1	165934735	165934884	150	*	A_WT_peak_1070	27	3.97406	5.82196	2.70961	8	Intron (rna-NM_001033344.3/gene-Dusp27, intron 5 of 5)	1	165925717	165955467	29751	2	Dusp27	rna-NM_001033344.3	20583
chr1	166065825	166066500	676	*	A_WT_peak_1071	55	5.40536	9.09863	5.5112	122	Promoter (<=1kb)	1	166028954	166066313	37360	2	Mael	rna-NM_175296.4	0
chr1	166110165	166110480	316	*	A_WT_peak_1072	40	4.6123	7.44068	4.05493	270	Intron (rna-XM_011238731.3/gene-Ildr2, intron 3 of 5)	1	166083829	166144405	60577	1	Ildr2	rna-XM_006496594.5	26336
chr1	166206700	166207114	415	*	A_WT_peak_1073	144	7.49045	18.8645	14.4885	82	Promoter (<=1kb)	1	166206736	166221190	14455	1	Tada1	rna-NM_030245.3	0
chr1	166236925	166237097	173	*	A_WT_peak_1074	34	4.17795	6.69093	3.41721	168	Intron (rna-XM_017312357.3/gene-Pogk, intron 1 of 3)	1	166221179	166237397	16219	2	Pogk	rna-NM_001142948.1	300
chr1	166626610	166626760	151	*	A_WT_peak_1075	22	4.07915	5.29532	2.28939	53	Distal Intergenic	1	166682689	166695660	12972	1	Gm33404	rna-XR_373681.2	-55929
chr1	167034866	167035198	333	*	A_WT_peak_1076	26	4.09189	5.76756	2.66575	81	Distal Intergenic	1	167074623	167076008	1386	1	Gm51816	gene-Gm51816	-39425
chr1	167081905	167082117	213	*	A_WT_peak_1077	15	3.27746	4.24275	1.571	101	Intron (rna-XM_030243727.2/gene-Uck2, intron 1 of 6)	1	167074623	167076008	1386	1	Gm51816	gene-Gm51816	7282
chr1	167111781	167111953	173	*	A_WT_peak_1078	35	4.1088	6.83957	3.54383	148	Intron (rna-XM_030243727.2/gene-Uck2, intron 1 of 6)	1	167050464	167112228	61765	2	Uck2	rna-XM_030243727.2	275
chr1	167135759	167136412	654	*	A_WT_peak_1079	90	5.92862	13.0436	9.09051	316	Promoter (<=1kb)	1	167136239	167161547	25309	1	Tmco1	rna-NM_001039483.1	0
chr1	167177392	167177832	441	*	A_WT_peak_1080	118	6.98382	15.9766	11.8011	236	Promoter (<=1kb)	1	167177532	167195860	18329	1	Aldh9a1	rna-XM_006496950.4	0
chr1	167221549	167222016	468	*	A_WT_peak_1081	34	4.37379	6.75111	3.46865	219	Promoter (<=1kb)	1	167199535	167221410	21876	2	Mgst3	rna-NM_025569.2	-139
chr1	167373886	167374178	293	*	A_WT_peak_1082	33	4.65156	6.65622	3.38844	100	Distal Intergenic	1	167425931	167467192	41262	1	Rxrg	rna-NM_009107.3	-51753
chr1	167516915	167517126	212	*	A_WT_peak_1083	28	4.08067	5.99838	2.85287	101	Promoter (<=1kb)	1	167517127	167676302	159176	1	Lmx1a	rna-NM_033652.5	-1
chr1	167604240	167604721	482	*	A_WT_peak_1084	26	4.22869	5.74497	2.64801	443	Intron (rna-XM_006496611.3/gene-Lmx1a, intron 4 of 9)	1	167517127	167676302	159176	1	Lmx1a	rna-NM_033652.5	87113
chr1	167645604	167645823	220	*	A_WT_peak_1085	63	5.78215	10.0844	6.39522	51	Intron (rna-XM_006496611.3/gene-Lmx1a, intron 5 of 9)	1	167517127	167676302	159176	1	Lmx1a	rna-NM_033652.5	128477
chr1	167765706	167766077	372	*	A_WT_peak_1086	46	5.1859	8.08491	4.61771	153	Distal Intergenic	1	167517127	167676302	159176	1	Lmx1a	rna-NM_033652.5	248579
chr1	167855341	167855554	214	*	A_WT_peak_1087	18	3.70689	4.72171	1.87726	41	Distal Intergenic	1	168170333	168229063	58731	1	Gm51671	rna-XR_003948152.2	-314779
chr1	167897079	167897236	158	*	A_WT_peak_1088	22	4.07915	5.29532	2.28939	4	Distal Intergenic	1	168170333	168229063	58731	1	Gm51671	rna-XR_003948152.2	-273097
chr1	168147974	168148138	165	*	A_WT_peak_1089	38	4.98563	7.18328	3.83141	75	Intron (rna-NM_008783.3/gene-Pbx1, intron 2 of 7)	1	168170333	168229063	58731	1	Gm51671	rna-XR_003948152.2	-22195
chr1	168210009	168210219	211	*	A_WT_peak_1090	49	5.44283	8.49931	4.97933	120	Exon (rna-XR_003948152.2/gene-Gm51671, exon 2 of 2)	1	168170333	168229063	58731	1	Gm51671	rna-XR_003948152.2	39676
chr1	168244526	168244704	179	*	A_WT_peak_1091	29	4.46713	6.11713	2.95051	130	Intron (rna-NM_008783.3/gene-Pbx1, intron 2 of 7)	1	167946933	168259738	312806	2	Pbx1	rna-NM_008783.3	15034
chr1	168259628	168260157	530	*	A_WT_peak_1092	94	6.78292	13.3959	9.4141	402	Promoter (<=1kb)	1	167946933	168259738	312806	2	Pbx1	rna-NM_008783.3	0
chr1	168520931	168521103	173	*	A_WT_peak_1093	22	4.07915	5.29532	2.28939	4	Intron (rna-XR_373692.3/gene-Gm34320, intron 1 of 3)	1	168489064	168537619	48556	2	Gm34320	rna-XR_373692.3	16516
chr1	168654649	168654822	174	*	A_WT_peak_1094	30	4.53239	6.21905	3.02288	37	Distal Intergenic	1	168489064	168559115	70052	2	Gm34320	rna-XR_373691.2	-95534
chr1	169123526	169123780	255	*	A_WT_peak_1095	21	3.93717	5.07638	2.14357	8	Distal Intergenic	1	169082179	169088445	6267	1	Gm34421	rna-XR_373694.2	41347
chr1	169733593	169733753	161	*	A_WT_peak_1096	25	4.18679	5.67954	2.5952	146	Distal Intergenic	1	169756172	169764816	8645	1	Ccdc190	rna-XM_030243683.2	-22419
chr1	169796624	169796981	358	*	A_WT_peak_1097	112	6.91791	15.3985	11.2647	266	Promoter (<=1kb)	1	169796978	169799965	2988	1	3110045C21Rik	rna-NR_040438.1	0
chr1	170002253	170002726	474	*	A_WT_peak_1098	157	7.64857	20.1708	15.7106	390	Promoter (<=1kb)	1	169968792	170002533	33742	2	Uap1	rna-NM_001305045.1	0
chr1	170031199	170031373	175	*	A_WT_peak_1099	25	4.17301	5.65801	2.57763	168	Intron (rna-XR_004940648.1/gene-Uhmk1, intron 6 of 6)	1	170020991	170042303	21313	2	Uhmk1	rna-NM_001360809.1	10930
chr1	170122072	170122277	206	*	A_WT_peak_1100	24	4.10543	5.55242	2.49373	8	Distal Intergenic	1	170125762	170133901	8140	2	Gm7694	rna-NM_001198955.1	11624
chr1	170183631	170183835	205	*	A_WT_peak_1101	48	5.33706	8.329	4.8289	131	Intron (rna-NR_154593.1/gene-Nos1ap, intron 4 of 9)	1	170136388	170139694	3307	1	Spata46	rna-NM_001039593.2	47243
chr1	170203875	170204133	259	*	A_WT_peak_1102	24	3.95269	5.54414	2.4872	220	Intron (rna-NR_154593.1/gene-Nos1ap, intron 3 of 9)	1	170136388	170139694	3307	1	Spata46	rna-NM_001039593.2	67487
chr1	170445224	170445540	317	*	A_WT_peak_1103	51	5.57165	8.70634	5.16164	141	Distal Intergenic	1	170458441	170459122	682	1	Gm7299	gene-Gm7299	-12901
chr1	170471949	170472115	167	*	A_WT_peak_1104	28	3.79388	6.00724	2.86006	1	Promoter (<=1kb)	1	170472046	170510358	38313	1	Olfml2b	rna-XM_006496901.4	0
chr1	170485332	170485482	151	*	A_WT_peak_1105	48	4.59703	8.32515	4.82513	108	Intron (rna-XM_006496901.4/gene-Olfml2b, intron 3 of 7)	1	170472101	170510358	38258	1	Olfml2b	rna-NM_177068.4	13231
chr1	170509072	170509253	182	*	A_WT_peak_1106	22	3.64111	5.26333	2.28732	156	Intron (rna-XM_006496901.4/gene-Olfml2b, intron 7 of 7)	1	170472101	170510358	38258	1	Olfml2b	rna-NM_177068.4	36971
chr1	170515023	170515205	183	*	A_WT_peak_1107	32	4.39932	6.51984	3.27336	86	Distal Intergenic	1	170472101	170510358	38258	1	Olfml2b	rna-NM_177068.4	42922
chr1	170640523	170640695	173	*	A_WT_peak_1108	13	3.23402	3.99034	1.39546	55	Intron (rna-NM_001081304.1/gene-Atf6, intron 9 of 15)	1	170660334	170660440	107	2	Gm25235	rna-XR_004936707.1	19745
chr1	170834688	170834896	209	*	A_WT_peak_1109	18	3.70689	4.72171	1.87726	160	Distal Intergenic	1	170846495	170857330	10836	1	Fcgr4	rna-NM_144559.2	-11599
chr1	170891923	170892216	294	*	A_WT_peak_1110	128	8.38052	17.0853	12.8324	132	Promoter (<=1kb)	1	170892160	170892180	21	2	rna-NR_106103.1	rna-Mir6546	0
chr1	170901991	170902193	203	*	A_WT_peak_1111	109	8.0078	15.0366	10.9285	44	Downstream (<=300bp)	1	170901871	170901941	71	1	n-TGgcc13	rna-n-TGgcc13	120
chr1	170940399	170940566	168	*	A_WT_peak_1112	25	3.82419	5.57204	2.50977	46	Promoter (<=1kb)	1	170941326	170953485	12160	1	Cfap126	rna-XM_036154106.1	-760
chr1	170977922	170978201	280	*	A_WT_peak_1113	56	5.31262	9.28302	5.67404	182	Promoter (<=1kb)	1	170956726	170978172	21447	2	Sdhc	rna-NM_025321.3	0
chr1	171023104	171023281	178	*	A_WT_peak_1114	22	3.72065	5.16853	2.21412	128	Intron (rna-NM_025557.1/gene-Pcp4l1, intron 1 of 2)	1	171000833	171023837	23005	2	Pcp4l1	rna-NM_025557.1	556
chr1	171050094	171050281	188	*	A_WT_peak_1115	38	4.02214	7.21894	3.86215	41	Promoter (<=1kb)	1	171045372	171050083	4712	2	Tomm40l	rna-NM_001037170.2	-11
chr1	171060988	171061225	238	*	A_WT_peak_1116	20	3.42007	4.88501	2.00004	235	Intron (rna-NM_010185.4/gene-Fcer1g, intron 1 of 4)	1	171057141	171061918	4778	2	Fcer1g	rna-NM_010185.4	693
chr1	171074456	171074953	498	*	A_WT_peak_1117	51	4.48696	8.72763	5.18074	224	Promoter (<=1kb)	1	171062422	171074691	12270	2	Ndufs2	rna-NM_153064.5	0
chr1	171090352	171090577	226	*	A_WT_peak_1118	21	3.6911	5.12038	2.17744	118	Distal Intergenic	1	171097898	171104468	6571	1	B4galt3	rna-NM_020579.2	-7321
chr1	171097613	171097880	268	*	A_WT_peak_1119	43	4.46964	7.78512	4.35391	187	Promoter (<=1kb)	1	171097898	171104468	6571	1	B4galt3	rna-NM_020579.2	-18
chr1	171108538	171109301	764	*	A_WT_peak_1120	94	5.24448	13.4518	9.46607	278	Promoter (<=1kb)	1	171104564	171108765	4202	2	Ppox	rna-XM_011238772.3	0
chr1	171157147	171157353	207	*	A_WT_peak_1121	28	3.53483	5.99543	2.85087	43	5' UTR	1	171157137	171169921	12785	1	Dedd	rna-NM_001357553.1	10
chr1	171173045	171173271	227	*	A_WT_peak_1122	29	3.74465	6.16358	2.98886	140	Promoter (<=1kb)	1	171168139	171173224	5086	2	Nit1	rna-XM_006496866.4	0
chr1	171188212	171188399	188	*	A_WT_peak_1123	34	4.16814	6.67372	3.4032	184	Promoter (<=1kb)	1	171186017	171188366	2350	2	Klhdc9	rna-NM_001033039.2	0
chr1	171238911	171239104	194	*	A_WT_peak_1124	55	4.67873	9.11173	5.52352	8	Promoter (<=1kb)	1	171239011	171246327	7317	1	Usf1	rna-XM_030253052.2	0
chr1	171252124	171252287	164	*	A_WT_peak_1125	17	3.31389	4.49789	1.71159	124	Intron (rna-NR_151523.1/gene-Gm26641, intron 1 of 1)	1	171246601	171247920	1320	1	Tstd1	rna-NM_001164525.1	5523
chr1	171330422	171330734	313	*	A_WT_peak_1126	47	4.51989	8.18009	4.70131	36	Promoter (<=1kb)	1	171330616	171330731	116	2	LOC115487699	rna-XR_004936876.1	0
chr1	171529660	171529849	190	*	A_WT_peak_1127	30	4.53239	6.21905	3.02288	181	Intron (rna-XM_006496637.4/gene-Cd48, intron 4 of 4)	1	171538638	171539097	460	1	Tma7-ps	rna-NM_001372440.1	-8789
chr1	171811960	171812223	264	*	A_WT_peak_1128	22	4.07915	5.29532	2.28939	236	Distal Intergenic	1	171828527	171842378	13852	2	Vangl2	rna-XM_017313008.3	30155
chr1	171836148	171836361	214	*	A_WT_peak_1129	17	3.34569	4.55098	1.75052	5	Exon (rna-XM_017313008.3/gene-Vangl2, exon 5 of 8)	1	171828527	171842378	13852	2	Vangl2	rna-XM_017313008.3	6017
chr1	171892312	171892476	165	*	A_WT_peak_1130	28	3.80201	6.02194	2.87227	130	Distal Intergenic	1	171879859	171885163	5305	2	Nhlh1	rna-NM_010916.2	-7149
chr1	171910071	171910679	609	*	A_WT_peak_1131	81	6.24332	12.0298	8.16124	237	Promoter (<=1kb)	1	171910096	171949899	39804	1	Copa	rna-NM_009938.4	0
chr1	171937681	171937884	204	*	A_WT_peak_1132	22	3.76079	5.23382	2.26415	35	Intron (rna-XM_036157379.1/gene-Copa, intron 15 of 32)	1	171954322	171964064	9743	1	Pex19	rna-NM_001159525.1	-16438
chr1	171975606	171976004	399	*	A_WT_peak_1133	146	7.56755	19.0222	14.6352	130	5' UTR	1	171975599	172023959	48361	1	Dcaf8	rna-XM_011238889.4	7
chr1	172086482	172086638	157	*	A_WT_peak_1134	24	4.07901	5.51111	2.46042	152	Promoter (<=1kb)	1	172051075	172085991	34917	2	Atp1a4	rna-NM_013734.1	-491
chr1	172192111	172192354	244	*	A_WT_peak_1135	39	4.89481	7.31772	3.9482	228	Intron (rna-NM_001039484.1/gene-Kcnj10, intron 1 of 1)	1	172204098	172211666	7569	1	Pigm	rna-NM_026234.4	-11744
chr1	172203848	172204418	571	*	A_WT_peak_1136	49	4.8202	8.41888	4.90831	372	Promoter (<=1kb)	1	172204098	172211666	7569	1	Pigm	rna-NM_026234.4	0
chr1	172220459	172220697	239	*	A_WT_peak_1137	21	3.91018	5.0348	2.1122	110	Distal Intergenic	1	172204098	172211666	7569	1	Pigm	rna-NM_026234.4	16361
chr1	172278608	172278774	167	*	A_WT_peak_1138	24	3.89745	5.4551	2.41611	4	Distal Intergenic	1	172302927	172305976	3050	1	Slamf9	rna-NM_029612.4	-24153
chr1	172288058	172288282	225	*	A_WT_peak_1139	37	4.74221	7.07326	3.74268	75	Distal Intergenic	1	172302927	172305976	3050	1	Slamf9	rna-NM_029612.4	-14645
chr1	172317905	172318237	333	*	A_WT_peak_1140	37	3.82983	7.09285	3.75999	96	Exon (rna-XM_036154500.1/gene-Igsf9, exon 5 of 21)	1	172309884	172326444	16561	1	Igsf9	rna-NM_033608.3	8021
chr1	172341595	172341763	169	*	A_WT_peak_1141	18	3.52344	4.63623	1.81338	114	Distal Intergenic	1	172348697	172373437	24741	1	Cfap45	rna-NM_027972.1	-6934
chr1	172460175	172460810	636	*	A_WT_peak_1142	121	6.95655	16.3771	12.1726	397	Promoter (<=1kb)	1	172458336	172460541	2206	2	Dusp23	rna-NM_026725.2	0
chr1	173173813	173174032	220	*	A_WT_peak_1143	13	3.26321	3.86632	1.31021	122	Exon (rna-XM_030243803.2/gene-Cadm3, exon 3 of 10)	1	173177105	173291418	114314	1	Aim2	rna-XM_036166269.1	-3073
chr1	173279104	173279289	186	*	A_WT_peak_1144	22	4.03464	5.22663	2.25879	31	Intron (rna-XM_036166269.1/gene-Aim2, intron 9 of 13)	1	173287264	173293606	6343	1	Aim2	rna-XM_006496929.3	-7975
chr1	174725658	174725816	159	*	A_WT_peak_1145	16	3.62591	4.41615	1.65115	30	Intron (rna-NM_011825.1/gene-Grem2, intron 1 of 1)	1	174661351	174749385	88035	2	Grem2	rna-NM_011825.1	23569
chr1	175012950	175013106	157	*	A_WT_peak_1146	16	3.62591	4.41615	1.65115	113	Promoter (2-3kb)	1	174886642	175010490	123849	2	Rgs7	rna-XM_036164665.1	-2460
chr1	175424597	175424763	167	*	A_WT_peak_1147	16	3.58634	4.35599	1.64906	115	Distal Intergenic	1	175428944	175453201	24258	2	Fh1	rna-NM_010209.2	28438
chr1	175452625	175453316	692	*	A_WT_peak_1148	143	7.4149	18.7092	14.3434	516	Promoter (<=1kb)	1	175428944	175453201	24258	2	Fh1	rna-NM_010209.2	0
chr1	175482971	175483200	230	*	A_WT_peak_1149	25	4.1322	5.59425	2.52676	71	Intron (rna-NM_133809.1/gene-Kmo, intron 11 of 14)	1	175459759	175488419	28661	1	Kmo	rna-NM_133809.1	23212
chr1	175519998	175520708	711	*	A_WT_peak_1150	377	10.7029	43.4572	37.7885	449	Promoter (<=1kb)	1	175520612	175524239	3628	1	Gm39707	rna-XR_865748.3	0
chr1	175708067	175708566	500	*	A_WT_peak_1151	67	5.78095	10.4494	6.72489	309	Promoter (<=1kb)	1	175708334	175736303	27970	1	Exo1	rna-XM_030254499.2	0
chr1	175725691	175725844	154	*	A_WT_peak_1152	31	4.33661	6.41784	3.18769	45	Intron (rna-XM_030254499.2/gene-Exo1, intron 10 of 14)	1	175732111	175732217	107	1	Gm23805	rna-XR_004936692.1	-6267
chr1	176537594	176538119	526	*	A_WT_peak_1153	27	4.34464	5.92595	2.79418	313	Distal Intergenic	1	176528183	176528292	110	1	Gm26104	rna-XR_004936714.1	9411
chr1	176641421	176642610	1190	*	A_WT_peak_1154	228	7.5151	27.7809	22.8719	375	Promoter (<=1kb)	1	176556638	176641538	84901	2	Cep170	rna-XM_006496940.5	0
chr1	176712882	176713050	169	*	A_WT_peak_1155	23	3.95184	5.31203	2.30169	44	Intron (rna-NR_151682.1/gene-Sdccag8, intron 13 of 16)	1	176735589	176760101	24513	2	Gm15423	rna-XR_865760.3	47051
chr1	176766090	176766443	354	*	A_WT_peak_1156	20	3.87038	4.9735	2.0662	59	Intron (rna-NR_151682.1/gene-Sdccag8, intron 14 of 16)	1	176735589	176768568	32980	2	Gm15423	rna-XR_003948787.1	2125
chr1	176793593	176793846	254	*	A_WT_peak_1157	43	4.79941	7.75734	4.32956	57	Intron (rna-NM_029756.3/gene-Sdccag8, intron 16 of 17)	1	176735589	176768568	32980	2	Gm15423	rna-XR_003948787.1	-25025
chr1	176884847	176884997	151	*	A_WT_peak_1158	16	3.62591	4.41615	1.65115	26	Intron (rna-NM_011785.4/gene-Akt3, intron 9 of 12)	1	176735589	176768568	32980	2	Gm15423	rna-XR_003948787.1	-116279
chr1	176984167	176984483	317	*	A_WT_peak_1159	18	3.71898	4.74033	1.89158	272	Intron (rna-NM_011785.4/gene-Akt3, intron 1 of 12)	1	176847642	177076333	228692	2	Akt3	rna-NM_011785.4	91850
chr1	177035642	177035791	150	*	A_WT_peak_1160	16	3.62591	4.41615	1.65115	58	Intron (rna-NM_011785.4/gene-Akt3, intron 1 of 12)	1	176847642	177076333	228692	2	Akt3	rna-NM_011785.4	40542
chr1	177086146	177086674	529	*	A_WT_peak_1161	58	5.06182	9.51797	5.8852	397	Promoter (<=1kb)	1	176847642	177085527	237886	2	Akt3	rna-XM_030253910.1	-619
chr1	177263018	177263217	200	*	A_WT_peak_1162	37	4.56777	7.07414	3.74319	53	Distal Intergenic	1	177269858	177278330	8473	1	Zbtb18	rna-XM_030254843.2	-6641
chr1	177269020	177269796	777	*	A_WT_peak_1163	191	7.95253	23.865	19.1831	602	Promoter (<=1kb)	1	177269858	177278330	8473	1	Zbtb18	rna-XM_030254843.2	-62
chr1	177434962	177435129	168	*	A_WT_peak_1164	31	4.47252	6.37316	3.15092	163	Distal Intergenic	1	177407077	177407095	19	2	rna-NR_162777.1	rna-Gm51282	-27867
chr1	177448413	177448637	225	*	A_WT_peak_1165	43	4.6516	7.80923	4.37503	115	Distal Intergenic	1	177469108	177470509	1402	2	2310043L19Rik	rna-NR_037994.1	21872
chr1	177623525	177623729	205	*	A_WT_peak_1166	40	3.99759	7.44082	4.05493	158	Intron (rna-XR_001785476.2/gene-Adss, intron 1 of 11)	1	177590744	177624075	33332	2	Adss	rna-NM_007422.3	346
chr1	177623894	177624442	549	*	A_WT_peak_1167	187	7.98119	23.4183	18.7626	372	Promoter (<=1kb)	1	177590742	177624275	33534	2	Adss	rna-XR_001785476.2	0
chr1	177810669	177811114	446	*	A_WT_peak_1168	84	6.39246	12.2925	8.40088	40	Promoter (<=1kb)	1	177810724	178000273	189550	1	Catspere2	rna-XM_030255583.2	0
chr1	178014921	178015452	532	*	A_WT_peak_1169	121	7.97319	16.3832	12.1778	231	Promoter (<=1kb)	1	178014983	178080164	65182	1	Desi2	rna-NM_024282.3	0
chr1	178146348	178146872	525	*	A_WT_peak_1170	159	7.11471	20.4317	15.9546	323	Promoter (<=1kb)	1	178146379	178150255	3877	1	Cox20	rna-XM_017321962.3	0
chr1	178164064	178164412	349	*	A_WT_peak_1171	69	5.11164	10.6497	6.90572	142	Intron (rna-NR_149827.1/gene-Hnrnpu, intron 1 of 16)	1	178148673	178165380	16708	2	Hnrnpu	rna-NR_149827.1	968
chr1	178172233	178172421	189	*	A_WT_peak_1172	38	4.14957	7.19027	3.83721	127	Promoter (2-3kb)	1	178148673	178170063	21391	2	Hnrnpu	rna-XM_036152317.1	-2170
chr1	178233263	178234121	859	*	A_WT_peak_1173	98	5.7441	13.8461	9.82917	604	Promoter (<=1kb)	1	178233583	178312078	78496	1	Efcab2	rna-NM_026626.3	0
chr1	178275845	178276151	307	*	A_WT_peak_1174	45	5.32304	8.00034	4.54344	160	Intron (rna-NM_026626.3/gene-Efcab2, intron 2 of 6)	1	178261611	178264649	3039	2	LOC118567647	rna-XR_004935450.1	-11196
chr1	178324496	178324656	161	*	A_WT_peak_1175	30	4.53239	6.21905	3.02288	108	Distal Intergenic	1	178331661	178341547	9887	1	Gm31289	rna-XR_373745.3	-7005
chr1	178425668	178425889	222	*	A_WT_peak_1176	46	4.8288	8.11755	4.64641	162	Intron (rna-NM_001161665.1/gene-Kif26b, intron 2 of 14)	1	178464470	178464636	167	1	Gm24405	rna-XR_004936766.1	-38581
chr1	178539346	178539527	182	*	A_WT_peak_1177	57	5.14592	9.33163	5.71836	79	Intron (rna-NM_001161665.1/gene-Kif26b, intron 3 of 14)	1	178568645	178585525	16881	1	Gm34176	gene-Gm34176	-29118
chr1	178624569	178624754	186	*	A_WT_peak_1178	24	4.10543	5.55242	2.49373	7	5' UTR	1	178622531	178766765	144235	1	Kif26b	rna-XM_006496865.4	2038
chr1	178722727	178722906	180	*	A_WT_peak_1179	29	4.13615	6.08977	2.92774	151	Intron (rna-NM_001161665.1/gene-Kif26b, intron 10 of 14)	1	178622531	178766765	144235	1	Kif26b	rna-XM_006496865.4	100196
chr1	178734797	178734964	168	*	A_WT_peak_1180	47	4.51989	8.18009	4.70131	86	Intron (rna-NM_001161665.1/gene-Kif26b, intron 10 of 14)	1	178622531	178766765	144235	1	Kif26b	rna-XM_006496865.4	112266
chr1	178736178	178736591	414	*	A_WT_peak_1181	82	5.67086	12.1387	8.26078	175	Intron (rna-NM_001161665.1/gene-Kif26b, intron 10 of 14)	1	178622531	178766765	144235	1	Kif26b	rna-XM_006496865.4	113647
chr1	178909894	178910060	167	*	A_WT_peak_1182	22	3.80181	5.3004	2.2927	155	Intron (rna-NM_027188.4/gene-Smyd3, intron 8 of 11)	1	178782720	179005222	222503	2	Smyd3	rna-XM_030242841.1	95162
chr1	179027937	179028106	170	*	A_WT_peak_1183	21	3.79792	5.0703	2.13978	88	Intron (rna-NM_027188.4/gene-Smyd3, intron 5 of 11)	1	178782720	179039993	257274	2	Smyd3	rna-XM_017312213.1	11887
chr1	179143035	179143260	226	*	A_WT_peak_1184	13	3.27374	3.88226	1.32154	134	Exon (rna-XR_373746.3/gene-Gm31349, exon 2 of 2)	1	179124948	179155629	30682	2	Gm31349	rna-XR_373746.3	12369
chr1	179177259	179177474	216	*	A_WT_peak_1185	19	3.64502	4.82906	1.95847	63	Intron (rna-NM_027188.4/gene-Smyd3, intron 5 of 11)	1	179124948	179155629	30682	2	Gm31349	rna-XR_373746.3	-21630
chr1	179344559	179344902	344	*	A_WT_peak_1186	35	3.94765	6.80594	3.51508	299	Intron (rna-NM_027188.4/gene-Smyd3, intron 1 of 11)	1	178779525	179345606	566082	2	Smyd3	rna-NM_027188.4	704
chr1	179345100	179345581	482	*	A_WT_peak_1187	57	4.80953	9.36978	5.75248	303	5' UTR	1	178779525	179345606	566082	2	Smyd3	rna-NM_027188.4	25
chr1	179373752	179374272	521	*	A_WT_peak_1188	206	8.62528	25.3934	20.622	297	Promoter (<=1kb)	1	179374009	179455043	81035	1	Cnst	rna-XM_006496799.4	0
chr1	179390819	179390984	166	*	A_WT_peak_1189	18	3.54313	4.66754	1.83651	7	Intron (rna-XM_006496799.4/gene-Cnst, intron 1 of 10)	1	179374094	179455038	80945	1	Cnst	rna-NM_146105.3	16725
chr1	179456197	179456467	271	*	A_WT_peak_1190	39	4.4038	7.37164	3.99467	63	Distal Intergenic	1	179495171	179514754	19584	1	Sccpdh	rna-XM_017321470.3	-38704
chr1	179473224	179473547	324	*	A_WT_peak_1191	83	6.15694	12.2763	8.3864	125	Distal Intergenic	1	179495171	179514754	19584	1	Sccpdh	rna-XM_017321470.3	-21624
chr1	179495743	179496174	432	*	A_WT_peak_1192	111	6.39006	15.225	11.1037	104	Promoter (<=1kb)	1	179495796	179514749	18954	1	Sccpdh	rna-NM_178653.3	0
chr1	179521910	179522072	163	*	A_WT_peak_1193	27	4.19026	5.92474	2.79351	45	Distal Intergenic	1	179495796	179514749	18954	1	Sccpdh	rna-NM_178653.3	26114
chr1	179631178	179631538	361	*	A_WT_peak_1194	221	9.0925	26.974	22.1119	309	5' UTR	1	179572469	179631580	59112	2	Ahctf1	rna-NM_026375.2	42
chr1	179777256	179777429	174	*	A_WT_peak_1195	23	3.85435	5.38549	2.36033	99	Distal Intergenic	1	179787058	179993171	206114	1	Cdc42bpa	rna-XM_006496802.5	-9629
chr1	179897441	179897812	372	*	A_WT_peak_1196	70	6.42883	10.7843	7.02802	317	Intron (rna-XM_006496802.5/gene-Cdc42bpa, intron 9 of 37)	1	179867773	179873262	5490	1	LOC108167749	rna-XR_001779567.1	29668
chr1	180023515	180023738	224	*	A_WT_peak_1197	148	7.00858	19.2502	14.8478	154	Promoter (<=1kb)	1	179992803	180023585	30783	2	Coq8a	rna-NM_023341.3	0
chr1	180042568	180042849	282	*	A_WT_peak_1198	41	4.67303	7.54383	4.14435	200	Exon (rna-XR_865768.2/gene-Gm37336, exon 1 of 2)	1	180039490	180043627	4138	2	Gm37336	rna-XR_865768.2	778
chr1	180048473	180048821	349	*	A_WT_peak_1199	47	4.74132	8.27775	4.78386	186	Distal Intergenic	1	180039490	180043627	4138	2	Gm37336	rna-XR_865768.2	-4846
chr1	180083428	180083937	510	*	A_WT_peak_1200	54	4.48102	9.02295	5.44388	109	Promoter (<=1kb)	1	180054569	180083865	29297	2	Psen2	rna-NM_001128605.1	0
chr1	180095925	180096095	171	*	A_WT_peak_1201	27	4.12823	5.8257	2.7124	138	Distal Intergenic	1	180054569	180091030	36462	2	Psen2	rna-XM_011238776.4	-4895
chr1	180180939	180181094	156	*	A_WT_peak_1202	28	3.75376	5.93452	2.80078	58	Intron (rna-XM_006496902.5/gene-Itpkb, intron 2 of 2)	1	180159108	180252367	93260	1	Itpkb	rna-XM_030254970.2	21831
chr1	180215108	180215303	196	*	A_WT_peak_1203	69	4.82883	10.7358	6.9836	136	Intron (rna-NM_001081175.1/gene-Itpkb, intron 2 of 7)	1	180209732	180252367	42636	1	Itpkb	rna-XM_036165700.1	5376
chr1	180303086	180303480	395	*	A_WT_peak_1204	34	4.32784	6.67409	3.4032	58	Intron (rna-NM_001081227.2/gene-Stum, intron 1 of 3)	1	180259938	180311069	51132	2	Stum	rna-NM_001081227.2	7589
chr1	180396187	180396500	314	*	A_WT_peak_1205	42	4.2356	7.63672	4.22444	312	Promoter (<=1kb)	1	180358990	180396324	37335	2	Gm31986	rna-XR_004935463.1	0
chr1	180419765	180419933	169	*	A_WT_peak_1206	29	3.74465	6.16358	2.98886	78	Intron (rna-NM_007415.3/gene-Parp1, intron 14 of 22)	1	180414808	180414825	18	1	rna-NR_105869.1	rna-Mir6904-2	4957
chr1	180469332	180469639	308	*	A_WT_peak_1207	66	4.95927	10.3386	6.62471	185	5' UTR	1	180468879	180518252	49374	1	Lin9	rna-XM_006496987.1	453
chr1	180533824	180534000	177	*	A_WT_peak_1208	14	2.94926	4.05522	1.44065	60	Distal Intergenic	1	180520608	180524599	3992	2	Mixl1	rna-NM_013729.3	-9225
chr1	180534457	180534659	203	*	A_WT_peak_1209	33	3.85023	6.61778	3.35635	139	Distal Intergenic	1	180520608	180524599	3992	2	Mixl1	rna-NM_013729.3	-9858
chr1	180591405	180591665	261	*	A_WT_peak_1210	18	3.20747	4.71393	1.87262	226	Exon (rna-XR_865779.2/gene-Gm38293, exon 2 of 2)	1	180590129	180596221	6093	2	Gm38293	rna-XR_865779.2	4556
chr1	180614112	180614299	188	*	A_WT_peak_1211	21	3.39935	5.06295	2.13385	33	Intron (rna-XR_373751.5/gene-2900024J01Rik, intron 2 of 2)	1	180605539	180620194	14656	1	2900024J01Rik	rna-XR_003948794.2	8573
chr1	180641139	180641602	464	*	A_WT_peak_1212	71	4.74043	10.8689	7.10534	250	Promoter (<=1kb)	1	180630125	180641170	11046	2	H3f3a	rna-NM_008210.5	0
chr1	180641809	180642192	384	*	A_WT_peak_1213	38	3.77638	7.23594	3.87693	182	Promoter (<=1kb)	1	180630125	180641170	11046	2	H3f3a	rna-NM_008210.5	-639
chr1	180678171	180678756	586	*	A_WT_peak_1214	237	8.6551	28.7242	23.7595	298	Promoter (<=1kb)	1	180678716	180695678	16963	1	Sde2	rna-NM_145943.1	0
chr1	180714194	180714425	232	*	A_WT_peak_1215	42	4.43059	7.71341	4.29119	170	Promoter (<=1kb)	1	180705089	180713423	8335	2	Gm39714	rna-XR_865783.2	-771
chr1	180723471	180723859	389	*	A_WT_peak_1216	32	3.52239	6.43759	3.20402	25	Intron (rna-NM_177099.4/gene-Lefty2, intron 3 of 3)	1	180720673	180726672	6000	1	Lefty2	rna-NM_177099.4	2798
chr1	180752786	180752979	194	*	A_WT_peak_1217	29	3.70092	6.08082	2.92088	42	Intron (rna-XR_004935465.1/gene-Gm39715, intron 1 of 2)	1	180762587	180765966	3380	1	Lefty1	rna-NM_010094.4	-9608
chr1	180769579	180769790	212	*	A_WT_peak_1218	26	3.63088	5.71014	2.61962	56	Promoter (<=1kb)	1	180770083	180802669	32587	1	Tmem63a	rna-NM_144794.2	-293
chr1	180800265	180800429	165	*	A_WT_peak_1219	18	3.21372	4.72541	1.88054	104	Exon (rna-XM_006496721.5/gene-Tmem63a, exon 21 of 23)	1	180773630	180802671	29042	1	Tmem63a	rna-XM_036163148.1	26635
chr1	180805901	180806148	248	*	A_WT_peak_1220	40	4.138	7.44679	4.05978	151	Distal Intergenic	1	180773630	180802671	29042	1	Tmem63a	rna-XM_036163148.1	32271
chr1	180809483	180809658	176	*	A_WT_peak_1221	52	5.03562	8.80032	5.24579	65	Distal Intergenic	1	180817121	180845134	28014	2	Ephx1	rna-NM_001312918.1	35476
chr1	180895189	180895373	185	*	A_WT_peak_1222	23	3.9642	5.3314	2.31795	138	Distal Intergenic	1	180889640	180892040	2401	1	Gm37406	rna-NR_168315.1	5549
chr1	180919731	180919927	197	*	A_WT_peak_1223	48	4.96757	8.35658	4.85327	27	3' UTR	1	180901755	180902477	723	1	Gm6606	gene-Gm6606	17976
chr1	180961634	180961789	156	*	A_WT_peak_1224	26	4.09189	5.76756	2.66575	35	Intron (rna-NM_026171.2/gene-Nvl, intron 6 of 22)	1	180914705	180971762	57058	2	Nvl	rna-XM_036153140.1	9973
chr1	180971340	180971526	187	*	A_WT_peak_1225	20	3.36464	5.0003	2.0862	21	Intron (rna-NM_026171.2/gene-Nvl, intron 1 of 22)	1	180914705	180971762	57058	2	Nvl	rna-XM_036153140.1	236
chr1	180971827	180972355	529	*	A_WT_peak_1226	83	5.71736	12.2309	8.34523	110	Promoter (<=1kb)	1	180914705	180971777	57073	2	Nvl	rna-XM_011238856.3	-50
chr1	180978512	180978703	192	*	A_WT_peak_1227	41	4.48694	7.51934	4.12334	184	5' UTR	1	180978496	180996559	18064	1	Cnih4	rna-NM_030131.3	16
chr1	180996147	180996340	194	*	A_WT_peak_1228	25	3.73023	5.6506	2.57256	167	3' UTR	1	180978496	180996559	18064	1	Cnih4	rna-NM_030131.3	17651
chr1	181039540	181040152	613	*	A_WT_peak_1229	46	4.16855	8.07337	4.60777	558	Promoter (<=1kb)	1	181000791	181039543	38753	2	Wdr26	rna-NM_145514.5	0
chr1	181084613	181085110	498	*	A_WT_peak_1230	56	4.93055	9.27232	5.66442	317	Distal Intergenic	1	181069509	181069947	439	2	Rpl35a-ps2	gene-Rpl35a-ps2	-14666
chr1	181100233	181100624	392	*	A_WT_peak_1231	42	5.12573	7.68624	4.26732	201	Distal Intergenic	1	181109600	181111654	2055	1	Gm8146	gene-Gm8146	-8976
chr1	181440275	181440427	153	*	A_WT_peak_1232	18	3.55307	4.68332	1.84905	89	Intron (rna-NM_001377039.1/gene-Dnah14, intron 12 of 86)	1	181448199	181454800	6602	2	Gm33612	rna-XR_373757.5	14373
chr1	181544056	181544247	192	*	A_WT_peak_1233	25	4.00952	5.63551	2.56073	170	Intron (rna-NM_001377039.1/gene-Dnah14, intron 51 of 86)	1	181448199	181454800	6602	2	Gm33612	rna-XR_373757.5	-89256
chr1	181601380	181601541	162	*	A_WT_peak_1234	18	3.53326	4.65185	1.82528	10	Exon (rna-NM_001377039.1/gene-Dnah14, exon 73 of 87)	1	181641172	181641265	94	2	Gm23690	gene-Gm23690	39724
chr1	181669176	181670185	1010	*	A_WT_peak_1235	105	6.11726	14.6519	10.5725	802	Promoter (<=1kb)	1	181642880	181669931	27052	2	Lbr	rna-XM_006497071.4	0
chr1	181715625	181715840	216	*	A_WT_peak_1236	18	3.09838	4.70574	1.86496	4	Distal Intergenic	1	181706041	181714276	8236	1	Gm33669	rna-XR_865801.2	9584
chr1	181716369	181716785	417	*	A_WT_peak_1237	53	4.44176	8.94075	5.37173	197	Distal Intergenic	1	181706041	181714276	8236	1	Gm33669	rna-XR_865801.2	10328
chr1	181769965	181770184	220	*	A_WT_peak_1238	50	5.5157	8.61647	5.08283	171	Intron (rna-NM_001083120.2/gene-Enah, intron 3 of 13)	1	181730122	181765582	35461	2	Enah	rna-XM_006496648.4	-4383
chr1	181847783	181848148	366	*	A_WT_peak_1239	38	4.49546	7.24114	3.88143	184	Promoter (<=1kb)	1	181730122	181847846	117725	2	Enah	rna-XM_036159237.1	0
chr1	181863824	181863980	157	*	A_WT_peak_1240	29	4.15877	6.12695	2.95839	35	Distal Intergenic	1	181869262	181878576	9315	1	Gm38648	rna-XR_865802.2	-5282
chr1	181951997	181952597	601	*	A_WT_peak_1241	78	5.61875	11.6555	7.81945	376	Promoter (<=1kb)	1	181936770	181952249	15480	2	Gm33725	rna-XR_001779583.3	0
chr1	182109747	182109926	180	*	A_WT_peak_1242	30	4.10162	6.29166	3.08301	124	Promoter (<=1kb)	1	182103529	182109760	6232	2	Degs1	rna-NM_001360783.1	0
chr1	182159911	182160061	151	*	A_WT_peak_1243	36	4.35214	6.99429	3.67584	62	Intron (rna-NM_175127.2/gene-Fbxo28, intron 1 of 4)	1	182140667	182169171	28505	2	Fbxo28	rna-NM_175127.2	9110
chr1	182236448	182236769	322	*	A_WT_peak_1244	81	5.99674	11.9831	8.11865	215	Promoter (<=1kb)	1	182236732	182290001	53270	1	Trp53bp2	rna-NM_173378.2	0
chr1	182344391	182344583	193	*	A_WT_peak_1245	30	4.05121	6.20565	3.02269	151	Intron (rna-NM_009794.4/gene-Capn2, intron 1 of 20)	1	182294818	182345175	50358	2	Capn2	rna-NM_009794.4	592
chr1	182426375	182426549	175	*	A_WT_peak_1246	20	3.69819	4.9131	2.02044	26	Exon (rna-XM_017319052.1/gene-Capn8, exon 5 of 19)	1	182392572	182459917	67346	1	Capn8	rna-NM_130890.2	33803
chr1	182457001	182457392	392	*	A_WT_peak_1247	34	4.03041	6.69595	3.42117	59	Intron (rna-XR_373596.3/gene-Capn8, intron 19 of 19)	1	182392572	182459917	67346	1	Capn8	rna-NM_130890.2	64429
chr1	182667256	182667440	185	*	A_WT_peak_1248	25	4.03271	5.67274	2.58956	22	Intron (rna-NM_001356462.1/gene-Susd4, intron 3 of 8)	1	182592461	182724156	131696	1	Susd4	rna-NM_144796.5	74795
chr1	182921431	182921603	173	*	A_WT_peak_1249	18	3.54313	4.66754	1.83651	1	Intron (rna-NM_001278220.1/gene-Disp1, intron 1 of 7)	1	182867830	182923112	55283	2	Disp1	rna-XM_036153391.1	1509
chr1	182983271	182983558	288	*	A_WT_peak_1250	34	4.66713	6.68081	3.40871	27	Intron (rna-NM_001278218.1/gene-Disp1, intron 1 of 8)	1	182867828	183003093	135266	2	Disp1	rna-NM_001278218.1	19535
chr1	183015371	183015744	374	*	A_WT_peak_1251	58	5.25894	9.53386	5.89961	176	Intron (rna-XM_036155374.1/gene-Fam177b, intron 5 of 5)	1	182867830	183010257	142428	2	Disp1	rna-XM_036153394.1	-5114
chr1	183078553	183078781	229	*	A_WT_peak_1252	37	4.09925	7.09517	3.7617	39	Promoter (<=1kb)	1	183078604	183105356	26753	1	Aida	rna-NM_181732.4	0
chr1	183079020	183079616	597	*	A_WT_peak_1253	39	4.19246	7.27096	3.90716	48	Promoter (<=1kb)	1	183057916	183078839	20924	2	Brox	rna-XR_389720.5	-181
chr1	183109950	183110168	219	*	A_WT_peak_1254	59	5.71399	9.61275	5.97047	79	Intron (rna-NM_177389.4/gene-Mia3, intron 26 of 27)	1	183107682	183126911	19230	2	Mia3	rna-XM_036165973.1	16743
chr1	183126350	183127469	1120	*	A_WT_peak_1255	93	6.0896	13.3634	9.38382	847	Promoter (<=1kb)	1	183126985	183131017	4033	1	Gm34102	rna-XR_389735.4	0
chr1	183150646	183150889	244	*	A_WT_peak_1256	22	3.64111	5.26333	2.28732	227	5' UTR	1	183107091	183150906	43816	2	Mia3	rna-NM_177389.4	17
chr1	183151052	183151357	306	*	A_WT_peak_1257	53	5.11177	8.93385	5.36549	266	Promoter (<=1kb)	1	183107682	183151091	43410	2	Mia3	rna-XM_036165966.1	0
chr1	183234898	183235066	169	*	A_WT_peak_1258	26	3.8927	5.68657	2.6006	125	Distal Intergenic	1	183200179	183217962	17784	1	Hhipl2	rna-NM_001308052.1	34719
chr1	183752134	183752290	157	*	A_WT_peak_1259	19	3.73114	4.75906	1.90534	44	Intron (rna-XR_865814.1/gene-Gm39725, intron 2 of 2)	1	183745512	183754667	9156	1	Gm39725	rna-XR_865814.1	6622
chr1	183766236	183766523	288	*	A_WT_peak_1260	21	3.37844	5.02523	2.10558	58	Promoter (<=1kb)	1	183765229	183766195	967	2	1700056E22Rik	rna-NM_028516.1	-41
chr1	184062356	184062514	159	*	A_WT_peak_1261	26	4.2571	5.78931	2.68317	25	Promoter (<=1kb)	1	184060827	184061586	760	2	Gm34177	rna-XR_865815.1	-770
chr1	184199539	184199904	366	*	A_WT_peak_1262	24	4.10543	5.55242	2.49373	283	Distal Intergenic	1	184160852	184164298	3447	2	Gm34229	rna-XR_373780.2	-35241
chr1	184411040	184411191	152	*	A_WT_peak_1263	16	3.50207	4.40581	1.65115	4	Distal Intergenic	1	184444694	184451186	6493	1	4930488B22Rik	rna-NR_040627.1	-33503
chr1	184581376	184581572	197	*	A_WT_peak_1264	43	4.47952	7.80321	4.36962	51	Promoter (2-3kb)	1	184545874	184579266	33393	2	Mtarc2	rna-XM_036153109.1	-2110
chr1	184615123	184615357	235	*	A_WT_peak_1265	23	3.7122	5.38366	2.35932	204	Promoter (<=1kb)	1	184604123	184615233	11111	2	C130074G19Rik	rna-NM_178692.3	0
chr1	184620648	184620820	173	*	A_WT_peak_1266	27	4.03734	5.92682	2.79418	128	Distal Intergenic	1	184604123	184615233	11111	2	C130074G19Rik	rna-NM_178692.3	-5415
chr1	184621771	184621928	158	*	A_WT_peak_1267	22	3.71075	5.1524	2.20189	41	Distal Intergenic	1	184604123	184615233	11111	2	C130074G19Rik	rna-NM_178692.3	-6538
chr1	184693292	184693527	236	*	A_WT_peak_1268	30	4.25176	6.27936	3.0729	47	Intron (rna-NM_145515.2/gene-Mark1, intron 1 of 17)	1	184628986	184675456	46471	2	Mark1	rna-XM_030253538.1	-17836
chr1	184895778	184895930	153	*	A_WT_peak_1269	26	4.21463	5.72302	2.63057	113	Distal Intergenic	1	184920064	184929430	9367	2	LOC118567650	rna-XR_004935495.1	33500
chr1	184929475	184929822	348	*	A_WT_peak_1270	39	4.35339	7.28161	3.91686	215	Promoter (<=1kb)	1	184920103	184929430	9328	2	LOC118567650	rna-XR_004935498.1	-45
chr1	184967328	184967651	324	*	A_WT_peak_1271	29	4.43587	6.06832	2.91019	213	Exon (rna-XR_004935356.1/gene-Rab3gap2, exon 5 of 36)	1	184975123	184975235	113	1	Snora36b	rna-NR_034044.1	-7472
chr1	185008186	185008344	159	*	A_WT_peak_1272	24	3.75805	5.46097	2.42072	9	Intron (rna-XR_004935356.1/gene-Rab3gap2, intron 29 of 35)	1	184975906	184980086	4181	2	Gm34882	rna-XR_373795.3	-28100
chr1	185061185	185061820	636	*	A_WT_peak_1273	76	5.31424	11.4192	7.60471	334	Promoter (<=1kb)	1	185061619	185089969	28351	1	Bpnt1	rna-XM_006497160.5	0
chr1	185069605	185069789	185	*	A_WT_peak_1274	27	4.15282	5.86499	2.74414	113	Intron (rna-XM_006497160.5/gene-Bpnt1, intron 1 of 9)	1	185064356	185089974	25619	1	Bpnt1	rna-NM_001347212.1	5249
chr1	185079737	185080053	317	*	A_WT_peak_1275	29	3.86831	6.14146	2.97063	185	Intron (rna-XM_006497160.5/gene-Bpnt1, intron 5 of 9)	1	185093614	185160552	66939	1	Eprs	rna-XM_017320653.2	-13561
chr1	185094849	185095571	723	*	A_WT_peak_1276	185	7.67909	23.222	18.5766	348	Promoter (<=1kb)	1	185095241	185160557	65317	1	Eprs	rna-NM_001357474.1	0
chr1	185493877	185494035	159	*	A_WT_peak_1277	19	3.60357	4.76343	1.90842	49	Distal Intergenic	1	185610129	185611092	964	2	Gm9722	gene-Gm9722	117057
chr1	185619389	185619538	150	*	A_WT_peak_1278	22	4.07915	5.29532	2.28939	15	Distal Intergenic	1	185610129	185611092	964	2	Gm9722	gene-Gm9722	-8297
chr1	185749517	185749679	163	*	A_WT_peak_1279	20	3.87038	4.9735	2.0662	40	Distal Intergenic	1	185763275	185766541	3267	2	LOC118567652	rna-XR_004935510.1	16862
chr1	185849428	185849594	167	*	A_WT_peak_1280	18	3.5731	4.71511	1.87292	158	Promoter (<=1kb)	1	185819929	185849507	29579	2	Lyplal1	rna-NM_146106.2	0
chr1	186105071	186105376	306	*	A_WT_peak_1281	65	6.07939	10.2142	6.51244	186	Distal Intergenic	1	186140017	186152709	12693	1	Gm35341	rna-XR_373803.2	-34641
chr1	186208083	186208234	152	*	A_WT_peak_1282	25	4.1322	5.59425	2.52676	85	Intron (rna-XR_373806.2/gene-Gm35426, intron 1 of 2)	1	186196037	186214155	18119	2	Gm35426	rna-XR_373806.2	5921
chr1	186415948	186416127	180	*	A_WT_peak_1283	24	4.10543	5.55242	2.49373	117	Intron (rna-XM_006497136.5/gene-Tgfb2, intron 2 of 7)	1	186408939	186409073	135	1	Gm26169	rna-XR_004936755.1	7009
chr1	186595558	186595880	323	*	A_WT_peak_1284	41	4.87882	7.58577	4.18068	39	Distal Intergenic	1	186657659	186662271	4613	1	1700023G09Rik	rna-XR_004935803.1	-61779
chr1	186700065	186700355	291	*	A_WT_peak_1285	57	5.54729	9.33586	5.72184	102	5' UTR	1	186699613	186702824	3212	1	D1Pas1	rna-NM_033077.3	452
chr1	186789826	186790007	182	*	A_WT_peak_1286	26	4.09189	5.76756	2.66575	26	Intron (rna-XM_006497207.4/gene-Spata17, intron 9 of 15)	1	186853066	186856562	3497	2	Gm15509	rna-NR_151534.1	66555
chr1	187062747	187063255	509	*	A_WT_peak_1287	51	4.9861	8.71313	5.16775	239	3' UTR	1	187005574	187017819	12246	1	Gm51737	rna-XR_003948552.2	57173
chr1	187324863	187325037	175	*	A_WT_peak_1288	25	4.18679	5.67954	2.5952	142	Promoter (1-2kb)	1	187253880	187323244	69365	2	Gm36388	rna-XR_003948553.1	-1619
chr1	187394556	187394731	176	*	A_WT_peak_1289	16	3.5456	4.47303	1.69208	50	5' UTR	1	187394355	187947081	552727	1	Esrrg	rna-XM_036165239.1	201
chr1	187942804	187943084	281	*	A_WT_peak_1290	47	5.43887	8.18462	4.70202	78	Intron (rna-XM_006497165.5/gene-Esrrg, intron 8 of 8)	1	187995035	188697238	702204	1	Ush2a	rna-NM_021408.3	-51951
chr1	188477940	188478215	276	*	A_WT_peak_1291	38	4.83261	7.21818	3.86167	219	Intron (rna-NM_021408.3/gene-Ush2a, intron 43 of 70)	1	188492673	188492776	104	1	Gm25269	rna-XR_004936738.1	-14458
chr1	188623947	188624161	215	*	A_WT_peak_1292	34	4.69859	6.73046	3.45106	185	Intron (rna-NM_021408.3/gene-Ush2a, intron 60 of 70)	1	188673603	188673676	74	1	n-TNgtt3	rna-n-TNgtt3	-49442
chr1	188650951	188651119	169	*	A_WT_peak_1293	24	3.91936	5.49045	2.44496	137	Intron (rna-NM_021408.3/gene-Ush2a, intron 63 of 70)	1	188673603	188673676	74	1	n-TNgtt3	rna-n-TNgtt3	-22484
chr1	188739386	188739591	206	*	A_WT_peak_1294	47	4.5678	8.27029	4.77737	79	Intron (rna-NM_001359576.1/gene-Kctd3, intron 1 of 17)	1	188703292	188740037	36746	2	Kctd3	rna-NM_001359576.1	446
chr1	188763541	188763735	195	*	A_WT_peak_1295	34	4.50353	6.68874	3.41571	27	Distal Intergenic	1	188766956	188771036	4081	1	Gm36561	rna-XR_373831.4	-3221
chr1	188949938	188950094	157	*	A_WT_peak_1296	35	4.74657	6.80618	3.51508	149	Intron (rna-NM_001159850.1/gene-Kcnk2, intron 6 of 6)	1	189009519	189010044	526	2	Pdcd5-ps	gene-Pdcd5-ps	59950
chr1	189046137	189046659	523	*	A_WT_peak_1297	52	5.21271	8.77416	5.22265	175	Intron (rna-NM_001159850.1/gene-Kcnk2, intron 2 of 6)	1	189075248	189077089	1842	1	A430027H14Rik	rna-NR_165462.1	-28589
chr1	189049440	189049607	168	*	A_WT_peak_1298	18	3.52344	4.63623	1.81338	4	Intron (rna-NM_001159850.1/gene-Kcnk2, intron 2 of 6)	1	189075248	189077089	1842	1	A430027H14Rik	rna-NR_165462.1	-25641
chr1	189135760	189135952	193	*	A_WT_peak_1299	32	4.51597	6.44194	3.20718	9	Promoter (<=1kb)	1	188940127	189134979	194853	2	Kcnk2	rna-XM_006497121.4	-781
chr1	189364865	189365035	171	*	A_WT_peak_1300	27	4.19026	5.92474	2.79351	74	Distal Intergenic	1	189350302	189351886	1585	2	Gm30088	rna-XR_373838.4	-12979
chr1	189384221	189384416	196	*	A_WT_peak_1301	15	3.47571	4.18811	1.53216	28	Intron (rna-NM_001081363.2/gene-Cenpf, intron 13 of 17)	1	189350302	189351886	1585	2	Gm30088	rna-XR_373838.4	-32335
chr1	189411852	189412062	211	*	A_WT_peak_1302	38	4.78698	7.14508	3.8041	189	Intron (rna-NM_001081363.2/gene-Cenpf, intron 6 of 17)	1	189372803	189420283	47481	2	Cenpf	rna-NM_001081363.2	8221
chr1	189420144	189420730	587	*	A_WT_peak_1303	201	8.39374	24.8754	20.1323	236	Promoter (<=1kb)	1	189372803	189420283	47481	2	Cenpf	rna-NM_001081363.2	0
chr1	189467010	189467217	208	*	A_WT_peak_1304	16	3.27497	4.43275	1.66325	64	Intron (rna-XM_006497134.4/gene-Ptpn14, intron 1 of 17)	1	189460465	189608892	148428	1	Ptpn14	rna-NM_008976.2	6545
chr1	189661693	189661847	155	*	A_WT_peak_1305	19	3.48797	4.78705	1.92635	32	Distal Intergenic	1	189618717	189654758	36042	2	Smyd2	rna-XM_006497147.5	-6935
chr1	189674292	189674520	229	*	A_WT_peak_1306	32	4.56028	6.51201	3.26659	164	Distal Intergenic	1	189618717	189654758	36042	2	Smyd2	rna-XM_006497147.5	-19534
chr1	189876177	189876359	183	*	A_WT_peak_1307	19	3.62418	4.79607	1.93327	24	Intron (rna-NM_001360827.1/gene-Prox1, intron 4 of 4)	1	189850232	189901712	51481	2	Prox1	rna-NM_001360827.1	25353
chr1	189914957	189915230	274	*	A_WT_peak_1308	67	5.81213	10.5032	6.77392	42	Intron (rna-NR_151620.1/gene-Prox1os, intron 1 of 1)	1	189850232	189903024	52793	2	Prox1	rna-NM_008937.3	-11933
chr1	189940237	189940399	163	*	A_WT_peak_1309	40	4.99118	7.47168	4.08144	64	Intron (rna-NR_151620.1/gene-Prox1os, intron 1 of 1)	1	189850232	189903024	52793	2	Prox1	rna-NM_008937.3	-37213
chr1	190097997	190098146	150	*	A_WT_peak_1310	25	4.02108	5.65408	2.57458	12	Distal Intergenic	1	190124026	190130721	6696	2	Gm39737	rna-XR_865862.2	32575
chr1	190186862	190187125	264	*	A_WT_peak_1311	20	3.76408	5.01702	2.0988	54	Distal Intergenic	1	190165122	190175000	9879	2	Gm30725	rna-XR_003948944.1	-11862
chr1	190222558	190222862	305	*	A_WT_peak_1312	64	5.42272	10.1808	6.48219	150	Distal Intergenic	1	190165122	190175000	9879	2	Gm30725	rna-XR_003948944.1	-47558
chr1	190266796	190267230	435	*	A_WT_peak_1313	40	4.57662	7.37989	4.00226	128	Distal Intergenic	1	190326485	190329316	2832	1	Gm30932	rna-XR_373854.2	-59255
chr1	190270577	190270769	193	*	A_WT_peak_1314	37	4.55515	7.05321	3.72578	9	Distal Intergenic	1	190326485	190329316	2832	1	Gm30932	rna-XR_373854.2	-55716
chr1	190340898	190341117	220	*	A_WT_peak_1315	24	4.06592	5.49065	2.44496	108	Distal Intergenic	1	190326485	190329316	2832	1	Gm30932	rna-XR_373854.2	14413
chr1	190417629	190417839	211	*	A_WT_peak_1316	30	4.05121	6.20565	3.02269	37	Distal Intergenic	1	190432398	190456868	24471	2	Gm38452	rna-XR_373860.4	39029
chr1	190605096	190605303	208	*	A_WT_peak_1317	32	4.39932	6.51984	3.27336	60	Intron (rna-XM_036165697.1/gene-Rps6kc1, intron 4 of 13)	1	190505076	190576799	71724	2	Rps6kc1	rna-XM_036165698.1	-28297
chr1	190610721	190610905	185	*	A_WT_peak_1318	24	3.79556	5.52402	2.4713	51	Intron (rna-XM_036165697.1/gene-Rps6kc1, intron 4 of 13)	1	190505076	190637243	132168	2	Rps6kc1	rna-XM_036165697.1	26338
chr1	190643729	190644223	495	*	A_WT_peak_1319	67	5.7965	10.4763	6.74889	325	Promoter (<=1kb)	1	190505076	190643785	138710	2	Rps6kc1	rna-XM_011238921.2	0
chr1	190660709	190660963	255	*	A_WT_peak_1320	30	3.95451	6.29583	3.08655	50	Promoter (<=1kb)	1	190660709	190679159	18451	1	Angel2	rna-XM_017321690.3	0
chr1	190667608	190667771	164	*	A_WT_peak_1321	36	4.66942	6.95631	3.64357	63	Intron (rna-NM_001199020.1/gene-Angel2, intron 3 of 9)	1	190661046	190679159	18114	1	Angel2	rna-XM_030255506.2	6562
chr1	190676542	190676694	153	*	A_WT_peak_1322	23	3.84373	5.3683	2.34685	9	Intron (rna-NM_001199020.1/gene-Angel2, intron 9 of 9)	1	190675091	190675894	804	1	LOC118567659	rna-XR_004935606.1	1451
chr1	190682491	190682765	275	*	A_WT_peak_1323	30	4.04127	6.18867	3.00908	79	Intron (rna-NM_144879.2/gene-Vash2, intron 7 of 7)	1	190675091	190675894	804	1	LOC118567659	rna-XR_004935606.1	7400
chr1	190695059	190695311	253	*	A_WT_peak_1324	35	3.93998	6.7912	3.50231	64	Intron (rna-NM_144879.2/gene-Vash2, intron 5 of 7)	1	190679843	190711195	31353	2	Vash2	rna-NM_144879.2	15884
chr1	190713635	190713801	167	*	A_WT_peak_1325	20	3.59591	4.96469	2.05936	21	Promoter (2-3kb)	1	190679951	190711500	31550	2	Vash2	rna-XM_006497149.5	-2135
chr1	190725981	190726253	273	*	A_WT_peak_1326	17	3.32971	4.52432	1.73038	3	Exon (rna-XR_373864.3/gene-Gm31373, exon 2 of 2)	1	190724958	190726682	1725	1	Gm31373	rna-XR_373865.5	1023
chr1	190757417	190757657	241	*	A_WT_peak_1327	62	5.66902	9.89301	6.22274	106	Promoter (<=1kb)	1	190757548	190761978	4431	1	A230020J21Rik	rna-NR_027298.1	0
chr1	190758556	190758763	208	*	A_WT_peak_1328	26	3.9637	5.80476	2.69598	43	Promoter (<=1kb)	1	190757106	190758387	1282	2	Flvcr1	rna-NM_198025.2	-169
chr1	190795174	190795364	191	*	A_WT_peak_1329	33	4.28285	6.59846	3.33989	81	Promoter (<=1kb)	1	190795213	190808539	13327	1	Nsl1	rna-XM_006497181.5	0
chr1	190811009	190811298	290	*	A_WT_peak_1330	20	3.58666	4.94951	2.04827	49	Intron (rna-XM_017321425.2/gene-Nsl1, intron 4 of 5)	1	190778034	190795373	17340	2	Tatdn3	rna-XM_006497204.5	-15636
chr1	190858199	190858456	258	*	A_WT_peak_1331	22	3.71075	5.1524	2.20189	113	Intron (rna-XR_004935608.1/gene-Gm46178, intron 2 of 2)	1	190853099	190859201	6103	1	Gm46178	rna-XR_004935608.1	5100
chr1	190951068	190951222	155	*	A_WT_peak_1332	17	3.20395	4.50846	1.71918	133	Distal Intergenic	1	190956651	190957884	1234	1	D730003I15Rik	rna-NR_151547.1	-5429
chr1	190956241	190956534	294	*	A_WT_peak_1333	65	4.93171	10.2819	6.57363	151	Promoter (<=1kb)	1	190956651	190957884	1234	1	D730003I15Rik	rna-NR_151547.1	-117
chr1	191035428	191035663	236	*	A_WT_peak_1334	23	3.4209	5.32059	2.30898	150	Distal Intergenic	1	191038984	191050328	11345	2	Nenf	rna-NM_025424.3	14665
chr1	191036584	191036755	172	*	A_WT_peak_1335	31	3.8353	6.33401	3.11806	112	Distal Intergenic	1	191038984	191050328	11345	2	Nenf	rna-NM_025424.3	13573
chr1	191058580	191058798	219	*	A_WT_peak_1336	17	3.23118	4.55628	1.7551	61	Intron (rna-NM_025864.4/gene-Pacc1, intron 1 of 7)	1	191058099	191083481	25383	1	Pacc1	rna-NM_025864.4	481
chr1	191129273	191129920	648	*	A_WT_peak_1337	387	10.8533	44.4973	38.7824	276	Promoter (<=1kb)	1	191084178	191129238	45061	2	Ppp2r5a	rna-NM_144880.4	-35
chr1	191217731	191217930	200	*	A_WT_peak_1338	26	3.6684	5.77893	2.67482	142	Promoter (1-2kb)	1	191219433	191222488	3056	1	Gm32334	rna-XR_373886.4	-1503
chr1	191239185	191239378	194	*	A_WT_peak_1339	46	5.00234	8.09719	4.6286	108	Distal Intergenic	1	191219433	191222488	3056	1	Gm32334	rna-XR_373886.4	19752
chr1	191307463	191308139	677	*	A_WT_peak_1340	227	8.66533	27.6575	22.7538	392	Promoter (<=1kb)	1	191269468	191307656	38189	2	Dtl	rna-NM_001305233.1	0
chr1	191330227	191330507	281	*	A_WT_peak_1341	23	3.85435	5.38549	2.36033	38	Intron (rna-XR_865812.3/gene-Ints7, intron 7 of 19)	1	191307748	191355802	48055	1	Ints7	rna-NM_178632.6	22479
chr1	191373865	191374081	217	*	A_WT_peak_1342	29	3.99232	6.10481	2.9407	144	Distal Intergenic	1	191380333	191381296	964	2	Gm39741	rna-XR_865888.2	7215
chr1	191392035	191392190	156	*	A_WT_peak_1343	19	3.49672	4.80149	1.93679	3	Distal Intergenic	1	191380333	191381296	964	2	Gm39741	rna-XR_865888.2	-10739
chr1	191401486	191401770	285	*	A_WT_peak_1344	24	3.76736	5.47663	2.43335	57	Distal Intergenic	1	191380333	191381296	964	2	Gm39741	rna-XR_865888.2	-20190
chr1	191450671	191450855	185	*	A_WT_peak_1345	38	4.33355	7.24607	3.88537	82	5' UTR	1	191450541	191516367	65827	1	Lpgat1	rna-XM_030253583.2	130
chr1	191550311	191550545	235	*	A_WT_peak_1346	60	4.49239	9.6669	6.0196	121	Promoter (1-2kb)	1	191552487	191565161	12675	1	Nek2	rna-XM_006497123.5	-1942
chr1	191553411	191553736	326	*	A_WT_peak_1347	65	4.77713	10.2904	6.58035	157	Promoter (<=1kb)	1	191553585	191565161	11577	1	Nek2	rna-NM_010892.3	0
chr1	191583677	191583842	166	*	A_WT_peak_1348	31	4.02629	6.42352	3.19198	99	Distal Intergenic	1	191553585	191565161	11577	1	Nek2	rna-NM_010892.3	30092
chr1	191638390	191638921	532	*	A_WT_peak_1349	223	7.50671	27.2605	22.3809	327	Promoter (<=1kb)	1	191638810	191641055	2246	1	Slc30a1	rna-XM_006497158.5	0
chr1	191675303	191675853	551	*	A_WT_peak_1350	75	5.89202	11.4022	7.58912	363	Distal Intergenic	1	191669995	191673344	3350	1	Gm39743	rna-XM_036155423.1	5308
chr1	191693590	191693779	190	*	A_WT_peak_1351	34	3.91715	6.74724	3.46526	147	Intron (rna-XM_006497206.5/gene-Rd3, intron 2 of 3)	1	191688662	191725497	36836	1	Rd3	rna-XM_036153877.1	4928
chr1	191735275	191735491	217	*	A_WT_peak_1352	18	3.28704	4.65405	1.82669	192	Intron (rna-NM_011633.2/gene-Traf5, intron 8 of 10)	1	191730515	191730595	81	2	Mir3473c	rna-NR_039566.1	-4680
chr1	191776786	191776998	213	*	A_WT_peak_1353	24	3.52276	5.51056	2.46042	90	Promoter (<=1kb)	1	191729164	191776899	47736	2	Traf5	rna-NM_011633.2	0
chr1	191820886	191821597	712	*	A_WT_peak_1354	45	4.43615	8.02149	4.56174	695	Promoter (<=1kb)	1	191821198	191835322	14125	1	Gm10516	rna-NR_033536.1	0
chr1	191966837	191967017	181	*	A_WT_peak_1355	28	4.10268	6.03467	2.8829	2	Intron (rna-XM_006497229.2/gene-Kcnh1, intron 6 of 10)	1	191907287	192192467	285181	1	Kcnh1	rna-XM_036162273.1	59550
chr1	192169153	192169357	205	*	A_WT_peak_1356	37	4.07454	7.04833	3.72194	47	Intron (rna-XM_006497229.2/gene-Kcnh1, intron 10 of 10)	1	192198463	192203017	4555	1	Gm31011	rna-XR_373898.3	-29106
chr1	192680900	192681075	176	*	A_WT_peak_1357	35	4.77911	6.85752	3.55916	120	Intron (rna-XM_030255030.2/gene-Syt14, intron 2 of 8)	1	192648416	192669111	20696	2	Syt14	rna-XM_011238937.2	-11789
chr1	192717793	192718524	732	*	A_WT_peak_1358	173	8.24852	21.9331	17.3646	503	Promoter (<=1kb)	1	192564956	192718171	153216	2	Syt14	rna-XM_030255032.2	0
chr1	192769698	192769911	214	*	A_WT_peak_1359	22	3.5811	5.16126	2.20837	173	Exon (rna-XR_004935650.1/gene-Gm31406, exon 2 of 4)	1	192773559	192783354	9796	1	Gm39747	rna-XR_004935661.1	-3648
chr1	192776345	192776693	349	*	A_WT_peak_1360	20	3.61456	4.99525	2.08251	27	Promoter (1-2kb)	1	192723290	192775123	51834	2	Gm31406	rna-XR_004935657.1	-1222
chr1	192871835	192872018	184	*	A_WT_peak_1361	28	3.92574	5.99028	2.84653	53	Intron (rna-NM_153137.4/gene-Traf3ip3, intron 8 of 15)	1	192857812	192883854	26043	2	Traf3ip3	rna-NM_153137.4	11836
chr1	192938579	192938775	197	*	A_WT_peak_1362	18	3.5832	4.73113	1.88409	179	Intron (rna-NM_008288.2/gene-Hsd11b1, intron 1 of 6)	1	192903994	192946329	42336	2	Hsd11b1	rna-XM_030249832.1	7554
chr1	192945452	192945688	237	*	A_WT_peak_1363	27	3.99493	5.85659	2.73778	6	Intron (rna-NM_008288.2/gene-Hsd11b1, intron 1 of 6)	1	192903994	192946329	42336	2	Hsd11b1	rna-XM_030249832.1	641
chr1	193105328	193105559	232	*	A_WT_peak_1364	87	6.16533	12.6955	8.77088	70	Distal Intergenic	1	193157598	193158001	404	1	Gm38022	gene-Gm38022	-52039
chr1	193186248	193186402	155	*	A_WT_peak_1365	28	4.20289	5.94489	2.80957	4	Distal Intergenic	1	193189775	193189796	22	2	rna-NR_029592.1	rna-Mir205	3394
chr1	193304398	193304594	197	*	A_WT_peak_1366	60	5.36366	9.71987	6.06749	143	Distal Intergenic	1	193337779	193431621	93843	1	Gm31870	rna-XR_001779912.2	-33185
chr1	193373571	193373822	252	*	A_WT_peak_1367	21	3.79792	5.0703	2.13978	49	Intron (rna-XR_001779912.2/gene-Gm31870, intron 2 of 3)	1	193337779	193431621	93843	1	Gm31870	rna-XR_001779912.2	35792
chr1	193577995	193578221	227	*	A_WT_peak_1368	38	4.98563	7.18328	3.83141	44	Distal Intergenic	1	193548635	193550269	1635	1	Gm21362	gene-Gm21362	29360
chr1	193640179	193640384	206	*	A_WT_peak_1369	20	3.8573	4.95335	2.05037	201	Distal Intergenic	1	193548635	193550269	1635	1	Gm21362	gene-Gm21362	91544
chr1	193747367	193747532	166	*	A_WT_peak_1370	22	4.07915	5.29532	2.28939	161	Distal Intergenic	1	193894495	193905067	10573	2	4930503O07Rik	rna-NR_040477.1	157535
chr1	193958545	193958733	189	*	A_WT_peak_1371	28	4.2672	6.04732	2.89303	173	Distal Intergenic	1	193937542	193944991	7450	1	Gm31988	rna-XR_373914.2	21003
chr1	193985710	193986227	518	*	A_WT_peak_1372	51	5.17019	8.70213	5.15791	396	Distal Intergenic	1	194000505	194023714	23210	2	Gm51784	rna-XR_003948952.1	37487
chr1	194503825	194504017	193	*	A_WT_peak_1373	22	4.02042	5.2047	2.24139	55	Promoter (<=1kb)	1	194504309	194504372	64	1	Mir3962	rna-NR_039539.1	-292
chr1	194621100	194621326	227	*	A_WT_peak_1374	33	4.6361	6.6318	3.36802	35	Promoter (<=1kb)	1	194621129	194643600	22472	1	Cd34	rna-NM_001111059.1	0
chr1	194658655	194659233	579	*	A_WT_peak_1375	50	5.12835	8.63109	5.09527	132	Exon (rna-NR_033564.1/gene-Gm16897, exon 1 of 5)	1	194638067	194659267	21201	2	Gm16897	rna-NR_033564.1	34
chr1	194699840	194700033	194	*	A_WT_peak_1376	22	3.92735	5.27364	2.28939	18	Exon (rna-NR_015566.2/gene-A330023F24Rik, exon 1 of 8)	1	194699707	194720216	20510	1	A330023F24Rik	rna-NR_015566.2	133
chr1	194779900	194780113	214	*	A_WT_peak_1377	22	4.07915	5.29532	2.28939	57	Intron (rna-XM_006497236.2/gene-Cd46, intron 1 of 10)	1	194724329	194781149	56821	2	Cd46	rna-XM_006497236.2	1036
chr1	194887264	194887613	350	*	A_WT_peak_1378	21	3.9508	5.09739	2.16018	110	Distal Intergenic	1	194877616	194879448	1833	1	Gm29726	rna-XM_036155380.1	9648
chr1	194909550	194909770	221	*	A_WT_peak_1379	31	4.47252	6.37316	3.15092	8	Distal Intergenic	1	194877616	194879448	1833	1	Gm29726	rna-XM_036155380.1	31934
chr1	195053509	195053952	444	*	A_WT_peak_1380	30	4.53239	6.21905	3.02288	86	Distal Intergenic	1	194877616	194879448	1833	1	Gm29726	rna-XM_036155380.1	175893
chr10	3354603	3354763	161	*	A_WT_peak_1381	22	4.07915	5.29532	2.28939	3	Intron (rna-XM_036156077.1/gene-Ppp1r14c, intron 1 of 4)	10	3343578	3414975	71398	1	Ppp1r14c	rna-XM_036156079.1	11025
chr10	3402704	3403008	305	*	A_WT_peak_1382	55	5.45185	9.17651	5.58047	123	Intron (rna-XM_030245354.2/gene-Ppp1r14c, intron 4 of 4)	10	3432654	3489627	56974	1	Gm29987	rna-XR_380040.3	-29646
chr10	3584130	3584468	339	*	A_WT_peak_1383	53	5.70671	8.92305	5.35563	114	Distal Intergenic	10	3668158	3681907	13750	1	A330032P22Rik	rna-NR_169108.1	-83690
chr10	3690861	3691260	400	*	A_WT_peak_1384	38	4.64503	7.20189	3.84741	150	5' UTR	10	3690599	3917303	226705	1	Plekhg1	rna-XM_011243077.2	262
chr10	3746329	3746534	206	*	A_WT_peak_1385	21	3.9508	5.09739	2.16018	124	Intron (rna-XM_011243078.2/gene-Plekhg1, intron 2 of 17)	10	3775129	3913526	138398	1	Plekhg1	rna-XR_004936151.1	-28595
chr10	4098799	4098961	163	*	A_WT_peak_1386	30	4.20475	6.2024	3.02052	5	Intron (rna-XR_004936188.1/gene-Mthfd1l, intron 28 of 28)	10	4119887	4120018	132	1	Gm25369	rna-XR_004936566.1	-20926
chr10	4170159	4170339	181	*	A_WT_peak_1387	19	3.79317	4.85459	1.97715	168	Distal Intergenic	10	4156426	4163120	6695	2	Gm30570	rna-NR_152620.1	-7039
chr10	4216586	4217137	552	*	A_WT_peak_1388	37	4.23698	7.07234	3.74228	195	Exon (rna-NM_031185.3/gene-Akap12, exon 1 of 4)	10	4216329	4309471	93143	1	Akap12	rna-NM_031185.3	257
chr10	4223663	4223864	202	*	A_WT_peak_1389	24	3.91936	5.49045	2.44496	47	Intron (rna-NM_031185.3/gene-Akap12, intron 1 of 3)	10	4216329	4309471	93143	1	Akap12	rna-NM_031185.3	7334
chr10	4296805	4297086	282	*	A_WT_peak_1390	79	6.11648	11.8047	7.9568	226	Intron (rna-NM_031185.3/gene-Akap12, intron 2 of 3)	10	4249761	4260710	10950	2	Gm40592	rna-XR_004936442.1	-36095
chr10	4336540	4337213	674	*	A_WT_peak_1391	185	6.74968	23.2088	18.5638	437	Intron (rna-NM_001359811.1/gene-Zbtb2, intron 1 of 2)	10	4317074	4337475	20402	2	Zbtb2	rna-NM_001359811.1	262
chr10	4382208	4382524	317	*	A_WT_peak_1392	53	4.58957	8.93403	5.36549	268	Promoter (<=1kb)	10	4353168	4382277	29110	2	Rmnd1	rna-XM_036155943.1	0
chr10	4915315	4915590	276	*	A_WT_peak_1393	31	4.48691	6.39594	3.1697	110	Intron (rna-NM_001302532.1/gene-Esr1, intron 7 of 9)	10	4970192	5019063	48872	2	Syne1	rna-NM_022027.2	103473
chr10	4962073	4962259	187	*	A_WT_peak_1394	26	4.09189	5.76756	2.66575	13	Distal Intergenic	10	4970192	5019063	48872	2	Syne1	rna-NM_022027.2	56804
chr10	5122662	5122816	155	*	A_WT_peak_1395	13	3.29502	3.91446	1.34341	69	Intron (rna-NM_001079686.1/gene-Syne1, intron 6 of 54)	10	4970192	5144707	174516	2	Syne1	rna-NM_001079686.1	21891
chr10	5177654	5177859	206	*	A_WT_peak_1396	20	3.88356	4.99379	2.08156	49	Exon (rna-XM_036155934.1/gene-Syne1, exon 64 of 133)	10	4970192	5144707	174516	2	Syne1	rna-NM_001079686.1	-32947
chr10	5215791	5216043	253	*	A_WT_peak_1397	30	4.53239	6.21905	3.02288	181	Intron (rna-XM_036155934.1/gene-Syne1, intron 45 of 132)	10	5276805	5278873	2069	1	Gm51757	rna-XR_003948824.2	-60762
chr10	5356671	5357082	412	*	A_WT_peak_1398	41	5.00761	7.49791	4.10479	360	Intron (rna-XM_017314044.3/gene-Syne1, intron 10 of 144)	10	4970192	5327827	357636	2	Syne1	rna-XM_036155933.1	-28844
chr10	5754960	5756085	1126	*	A_WT_peak_1399	161	7.22201	20.6819	16.1894	599	Promoter (<=1kb)	10	5749155	5755252	6098	2	Fbxo5	rna-XM_036155959.1	0
chr10	5773875	5774505	631	*	A_WT_peak_1400	160	6.95648	20.5231	16.0402	144	Promoter (<=1kb)	10	5761887	5773943	12057	2	Mtrf1l	rna-NM_175374.3	0
chr10	5856763	5856986	224	*	A_WT_peak_1401	38	4.98563	7.18328	3.83141	70	Intron (rna-NM_001161822.1/gene-Rgs17, intron 2 of 5)	10	5775787	5872178	96392	2	Rgs17	rna-XM_030245185.2	15192
chr10	5872720	5872901	182	*	A_WT_peak_1402	34	4.5169	6.71036	3.43377	125	Promoter (<=1kb)	10	5775787	5872413	96627	2	Rgs17	rna-XM_006512457.5	-307
chr10	5932823	5933033	211	*	A_WT_peak_1403	16	3.62591	4.41615	1.65115	173	Distal Intergenic	10	5775787	5872413	96627	2	Rgs17	rna-XM_006512457.5	-60410
chr10	6707040	6707194	155	*	A_WT_peak_1404	22	4.07915	5.29532	2.28939	16	Promoter (1-2kb)	10	6708593	6800572	91980	1	Oprm1	rna-NM_001302794.1	-1399
chr10	6738706	6738899	194	*	A_WT_peak_1405	36	4.81209	6.90955	3.60361	39	5' UTR	10	6738576	6988209	249634	1	Oprm1	rna-NM_001039652.2	130
chr10	6837702	6837905	204	*	A_WT_peak_1406	31	4.47252	6.37316	3.15092	96	3' UTR	10	6835796	6930281	94486	2	Ipcef1	rna-NM_001347225.1	92376
chr10	6937437	6937657	221	*	A_WT_peak_1407	36	4.66942	6.95631	3.64357	19	Intron (rna-NM_001302795.1/gene-Oprm1, intron 4 of 5)	10	6835779	6930580	94802	2	Ipcef1	rna-XM_030245126.2	-6857
chr10	7057791	7058028	238	*	A_WT_peak_1408	16	3.58634	4.35599	1.64906	30	Distal Intergenic	10	6861543	6973185	111643	2	Ipcef1	rna-NM_001033391.2	-84606
chr10	7089638	7089892	255	*	A_WT_peak_1409	54	5.54988	8.9994	5.42321	162	Intron (rna-XM_030244998.2/gene-Cnksr3, intron 6 of 12)	10	7069061	7159987	90927	2	Cnksr3	rna-XM_030244998.2	70095
chr10	7108273	7108422	150	*	A_WT_peak_1410	22	3.64985	5.27815	2.28939	64	Intron (rna-XM_030244998.2/gene-Cnksr3, intron 2 of 12)	10	7069061	7159987	90927	2	Cnksr3	rna-XM_030244998.2	51565
chr10	7124073	7124276	204	*	A_WT_peak_1411	22	3.53044	5.29782	2.29087	181	Intron (rna-XM_030244998.2/gene-Cnksr3, intron 1 of 12)	10	7069061	7159987	90927	2	Cnksr3	rna-XM_030244998.2	35711
chr10	7161549	7162011	463	*	A_WT_peak_1412	23	3.73958	5.42985	2.39591	23	5' UTR	10	7069061	7162231	93171	2	Cnksr3	rna-XM_036155726.1	220
chr10	7343290	7343598	309	*	A_WT_peak_1413	22	4.07915	5.29532	2.28939	46	Promoter (1-2kb)	10	7340148	7342184	2037	2	Gm21321	gene-Gm21321	-1106
chr10	7484448	7484662	215	*	A_WT_peak_1414	52	5.04815	8.82234	5.26583	35	Promoter (<=1kb)	10	7471725	7484439	12715	2	Gm16254	rna-NR_165256.1	-9
chr10	7538486	7539575	1090	*	A_WT_peak_1415	65	4.93171	10.2819	6.57363	262	Promoter (<=1kb)	10	7539135	7540387	1253	1	A630066F11Rik	rna-NR_030698.1	0
chr10	7543171	7543409	239	*	A_WT_peak_1416	99	5.7946	13.9567	9.93037	104	Promoter (<=1kb)	10	7543268	7554650	11383	1	Nup43	rna-NM_145706.2	0
chr10	7557095	7557580	486	*	A_WT_peak_1417	87	5.92383	12.6364	8.71712	299	Promoter (<=1kb)	10	7505144	7557101	51958	2	Pcmt1	rna-XM_017313832.2	0
chr10	7562925	7563113	189	*	A_WT_peak_1418	44	4.85189	7.84558	4.40686	43	Intron (rna-XR_004936108.1/gene-Lats1, intron 1 of 5)	10	7505144	7557101	51958	2	Pcmt1	rna-XM_017313832.2	-5824
chr10	7590889	7591164	276	*	A_WT_peak_1419	20	3.8573	4.95335	2.05037	114	3' UTR	10	7601748	7638913	37166	1	Katna1	rna-XM_030245091.2	-10584
chr10	7601522	7601781	260	*	A_WT_peak_1420	47	4.55814	8.25213	4.76125	89	Promoter (<=1kb)	10	7601748	7638913	37166	1	Katna1	rna-XM_030245091.2	0
chr10	7656269	7656785	517	*	A_WT_peak_1421	131	7.01766	17.4171	13.1376	369	Promoter (<=1kb)	10	7643711	7656681	12971	2	Ginm1	rna-NM_001346750.1	0
chr10	7775364	7775526	163	*	A_WT_peak_1422	25	4.14571	5.61537	2.5444	143	Distal Intergenic	10	7781417	7808972	27556	2	Tab2	rna-XM_036155973.1	33446
chr10	7830986	7831341	356	*	A_WT_peak_1423	33	4.0134	6.66464	3.3954	183	Promoter (<=1kb)	10	7781417	7831298	49882	2	Tab2	rna-XM_030245247.2	0
chr10	7832189	7832529	341	*	A_WT_peak_1424	28	3.76172	5.94896	2.81235	262	Promoter (<=1kb)	10	7781417	7832039	50623	2	Tab2	rna-XM_011243204.4	-150
chr10	7894199	7894440	242	*	A_WT_peak_1425	23	4.00174	5.39021	2.36417	34	Distal Intergenic	10	7855644	7864635	8992	1	Gm30820	rna-XR_871447.1	38555
chr10	8334047	8334324	278	*	A_WT_peak_1426	35	4.74657	6.80618	3.51508	56	Intron (rna-XR_004936207.1/gene-Ust, intron 1 of 8)	10	8080517	8394589	314073	2	Ust	rna-NM_177387.3	60265
chr10	8628443	8628593	151	*	A_WT_peak_1427	13	3.31657	3.94708	1.36537	19	Intron (rna-XM_006512839.5/gene-Sash1, intron 2 of 12)	10	8597981	8633732	35752	2	Sash1	rna-XM_006512839.5	5139
chr10	8881376	8881578	203	*	A_WT_peak_1428	19	3.80582	4.87408	1.99187	159	Promoter (2-3kb)	10	8884508	8903926	19419	1	Gm51794	rna-XR_003948990.1	-2930
chr10	9053409	9053687	279	*	A_WT_peak_1429	24	4.05292	5.47031	2.42885	39	Distal Intergenic	10	8884508	8903926	19419	1	Gm51794	rna-XR_003948990.1	168901
chr10	9312999	9313185	187	*	A_WT_peak_1430	52	5.43099	8.80501	5.25034	37	Intron (rna-XM_017313970.2/gene-Samd5, intron 1 of 1)	10	9226316	9232299	5984	1	Gm48750	rna-XR_003948989.2	86683
chr10	9315459	9315921	463	*	A_WT_peak_1431	52	5.46443	8.85977	5.29914	297	Intron (rna-XM_017313970.2/gene-Samd5, intron 1 of 1)	10	9226316	9232299	5984	1	Gm48750	rna-XR_003948989.2	89143
chr10	10433958	10434247	290	*	A_WT_peak_1432	56	5.89211	9.22019	5.61837	110	Promoter (<=1kb)	10	10420783	10433951	13169	2	Rab32	rna-NM_026405.3	-7
chr10	10662160	10662370	211	*	A_WT_peak_1433	27	4.30042	5.85694	2.73778	113	Intron (rna-XM_036155623.1/gene-Grm1, intron 2 of 8)	10	10626790	10633875	7086	1	4930567K20Rik	rna-NR_046010.1	35370
chr10	10889044	10889208	165	*	A_WT_peak_1434	30	4.53239	6.21905	3.02288	62	Intron (rna-XM_036155623.1/gene-Grm1, intron 1 of 8)	10	10562361	10921182	358822	2	Grm1	rna-XM_006512550.4	31974
chr10	11025033	11025421	389	*	A_WT_peak_1435	117	7.461	15.9493	11.7765	112	Promoter (<=1kb)	10	11025174	11085355	60182	1	Shprh	rna-NM_001284354.1	0
chr10	11156665	11157363	699	*	A_WT_peak_1436	147	7.85651	19.1082	14.7149	294	Promoter (<=1kb)	10	11157009	11170724	13716	1	Fbxo30	rna-XM_036156027.1	0
chr10	11385665	11386065	401	*	A_WT_peak_1437	30	4.53239	6.21905	3.02288	124	Distal Intergenic	10	11384629	11384771	143	1	LOC115487525	rna-XR_004936584.1	1036
chr10	12424338	12424580	243	*	A_WT_peak_1438	35	4.61278	6.86512	3.56595	139	Promoter (<=1kb)	10	12257931	12424418	166488	2	Utrn	rna-XM_006512717.4	0
chr10	12590236	12590521	286	*	A_WT_peak_1439	73	5.72398	11.0972	7.31243	73	Intron (rna-XM_006512713.4/gene-Utrn, intron 18 of 73)	10	12669619	12669718	100	2	Gm23044	gene-Gm23044	79197
chr10	12625140	12625296	157	*	A_WT_peak_1440	16	3.62591	4.41615	1.65115	43	Intron (rna-XM_006512713.4/gene-Utrn, intron 5 of 73)	10	12669619	12669718	100	2	Gm23044	gene-Gm23044	44422
chr10	12711895	12712136	242	*	A_WT_peak_1441	20	3.75294	4.99946	2.08566	55	Intron (rna-XM_030245067.2/gene-Utrn, intron 2 of 74)	10	12257931	12703106	445176	2	Utrn	rna-XM_006512711.5	-8789
chr10	12742642	12742800	159	*	A_WT_peak_1442	29	4.01176	6.13814	2.96789	48	Intron (rna-XM_030245067.2/gene-Utrn, intron 1 of 74)	10	12257931	12744058	486128	2	Utrn	rna-XM_030245067.2	1258
chr10	12743752	12744261	510	*	A_WT_peak_1443	31	4.15331	6.37954	3.15539	38	Promoter (<=1kb)	10	12257931	12744058	486128	2	Utrn	rna-XM_030245067.2	0
chr10	12769023	12769424	402	*	A_WT_peak_1444	32	4.57525	6.53566	3.28675	44	Distal Intergenic	10	12257931	12745632	487702	2	Utrn	rna-XM_011243167.3	-23391
chr10	12798617	12798974	358	*	A_WT_peak_1445	74	5.42412	11.2745	7.47407	50	Promoter (<=1kb)	10	12792390	12798871	6482	2	B230208H11Rik	rna-NR_038027.1	0
chr10	12883922	12884211	290	*	A_WT_peak_1446	53	5.12469	8.95643	5.38564	219	Promoter (<=1kb)	10	12884194	12884927	734	1	Sf3b5	rna-NM_175102.4	0
chr10	12994623	12994964	342	*	A_WT_peak_1447	24	4.05292	5.47031	2.42885	99	Intron (rna-NM_001364643.1/gene-Plagl1, intron 6 of 8)	10	12966589	12971644	5056	1	Hymai	rna-NR_131912.1	28034
chr10	13068530	13068962	433	*	A_WT_peak_1448	53	4.90018	8.8863	5.3226	302	Promoter (<=1kb)	10	13054341	13068761	14421	2	Ltv1	rna-XM_006512776.4	0
chr10	13190760	13190946	187	*	A_WT_peak_1449	37	4.93122	7.09745	3.76337	41	Intron (rna-XM_006512669.5/gene-Phactr2, intron 1 of 13)	10	13083461	13199987	116527	2	Phactr2	rna-XM_006512669.5	9041
chr10	13224817	13225050	234	*	A_WT_peak_1450	26	4.21463	5.72302	2.63057	166	Intron (rna-NM_001195066.1/gene-Phactr2, intron 1 of 12)	10	13083461	13200047	116587	2	Phactr2	rna-XM_036155729.1	-24770
chr10	13344313	13344524	212	*	A_WT_peak_1451	17	3.56778	4.50726	1.71836	64	Intron (rna-NM_001195065.1/gene-Phactr2, intron 1 of 12)	10	13083461	13350140	266680	2	Phactr2	rna-NM_001195065.1	5616
chr10	13408480	13408702	223	*	A_WT_peak_1452	47	5.43887	8.18462	4.70202	173	Intron (rna-NM_001164195.1/gene-Pex3, intron 8 of 11)	10	13428651	13439120	10470	1	Adat2	rna-NM_025748.4	-19949
chr10	13438212	13438383	172	*	A_WT_peak_1453	21	3.79792	5.0703	2.13978	46	Exon (rna-NM_025748.4/gene-Adat2, exon 5 of 6)	10	13428926	13437533	8608	1	Adat2	rna-XM_011243200.3	9286
chr10	13569142	13569460	319	*	A_WT_peak_1454	31	4.48691	6.39594	3.1697	128	Intron (rna-NM_001347362.1/gene-Aig1, intron 3 of 5)	10	13534761	13554725	19965	2	LOC118567825	rna-XR_004936456.1	-14417
chr10	13592941	13593108	168	*	A_WT_peak_1455	35	4.61278	6.86512	3.56595	36	Intron (rna-NM_001347362.1/gene-Aig1, intron 3 of 5)	10	13606049	13637729	31681	1	LOC118567823	rna-XR_004936454.1	-12941
chr10	13902877	13903068	192	*	A_WT_peak_1456	21	3.97836	5.13985	2.19193	25	Intron (rna-NM_001358783.1/gene-Hivep2, intron 2 of 12)	10	13842881	14027114	184234	1	Hivep2	rna-XM_036155643.1	59996
chr10	14287439	14287687	249	*	A_WT_peak_1457	30	4.53239	6.21905	3.02288	208	Intron (rna-XM_006512680.3/gene-Adgrg6, intron 22 of 24)	10	14198175	14200224	2050	1	Gm40603	rna-XR_871462.1	89264
chr10	14336310	14336472	163	*	A_WT_peak_1458	30	4.53239	6.21905	3.02288	146	Intron (rna-XM_006512680.3/gene-Adgrg6, intron 4 of 24)	10	14398806	14399340	535	1	Gm10335	gene-Gm10335	-62334
chr10	14580957	14581284	328	*	A_WT_peak_1459	85	7.25183	12.5092	8.59939	207	Promoter (<=1kb)	10	14531077	14581233	50157	2	Vta1	rna-NM_025418.3	0
chr10	14866541	14866824	284	*	A_WT_peak_1460	22	4.07915	5.29532	2.28939	93	Distal Intergenic	10	14860414	14860543	130	1	Gm23892	rna-XR_004936609.1	6127
chr10	17159504	17159823	320	*	A_WT_peak_1461	30	4.53239	6.21905	3.02288	147	Distal Intergenic	10	17194356	17199456	5101	2	Gm47761	gene-Gm47761	39633
chr10	17436532	17436712	181	*	A_WT_peak_1462	18	3.53326	4.65185	1.82528	59	Intron (rna-XR_380131.2/gene-LOC118567359, intron 3 of 4)	10	17387828	17444117	56290	2	LOC118567359	rna-XR_380131.2	7405
chr10	17898255	17898530	276	*	A_WT_peak_1463	46	5.20227	8.11139	4.64109	40	Intron (rna-NM_001359560.1/gene-Abracl, intron 1 of 2)	10	17887008	17898838	11831	2	Abracl	rna-NM_001359560.1	308
chr10	17910181	17910412	232	*	A_WT_peak_1464	27	4.28588	5.83424	2.71957	206	Distal Intergenic	10	17887008	17899000	11993	2	Abracl	rna-NM_028440.1	-11181
chr10	18100190	18100378	189	*	A_WT_peak_1465	48	5.33706	8.329	4.8289	53	Intron (rna-NM_144820.4/gene-Ccdc28a, intron 3 of 5)	10	18089424	18110729	21306	2	Ccdc28a	rna-NM_144820.4	10351
chr10	18110789	18111105	317	*	A_WT_peak_1466	35	4.57119	6.79806	3.50805	64	Promoter (<=1kb)	10	18089426	18110940	21515	2	Ccdc28a	rna-XR_003948656.2	0
chr10	18135692	18135875	184	*	A_WT_peak_1467	30	4.53239	6.21905	3.02288	177	Distal Intergenic	10	18111159	18130495	19337	1	LOC118567828	rna-XR_004936463.1	24533
chr10	18230876	18231058	183	*	A_WT_peak_1468	20	3.87038	4.9735	2.0662	85	Intron (rna-XM_030245007.2/gene-Nhsl1, intron 1 of 6)	10	18246734	18409463	162730	1	Nhsl1	rna-XM_006512691.5	-15676
chr10	18290002	18290285	284	*	A_WT_peak_1469	13	3.19776	3.93387	1.35625	149	Intron (rna-XM_030245007.2/gene-Nhsl1, intron 1 of 6)	10	18283423	18409640	126218	1	Nhsl1	rna-NM_173390.3	6579
chr10	18413165	18413343	179	*	A_WT_peak_1470	28	4.35958	5.94927	2.81235	67	Distal Intergenic	10	18415871	18421824	5954	2	Hebp2	rna-NM_019487.3	8481
chr10	18545075	18545604	530	*	A_WT_peak_1471	33	4.60547	6.58342	3.32671	268	Intron (rna-NM_001033258.4/gene-Arfgef3, intron 5 of 33)	10	18619219	18713745	94527	1	Gm32926	rna-NR_152783.1	-73615
chr10	18751990	18752282	293	*	A_WT_peak_1472	21	3.92363	5.05552	2.12843	245	Distal Intergenic	10	18720819	18732821	12003	1	Perp	rna-NM_022032.4	31171
chr10	18890641	18890798	158	*	A_WT_peak_1473	31	4.02629	6.42352	3.19198	151	Promoter (<=1kb)	10	18876658	18890332	13675	2	Tnfaip3	rna-XM_006512702.4	-309
chr10	18959631	18959783	153	*	A_WT_peak_1474	27	4.31506	5.87978	2.75647	32	Distal Intergenic	10	18962374	18962955	582	2	1700124M09Rik	rna-NR_166085.1	3172
chr10	19041913	19042215	303	*	A_WT_peak_1475	28	4.40504	6.0202	2.87101	43	Promoter (<=1kb)	10	19042986	19083695	40710	1	Gm20139	rna-NR_038022.1	-771
chr10	19467445	19468009	565	*	A_WT_peak_1476	169	8.53099	21.4555	16.917	64	Promoter (<=1kb)	10	19467697	19485977	18281	1	Ifngr1	rna-NM_010511.3	0
chr10	19571465	19571697	233	*	A_WT_peak_1477	22	4.07915	5.29532	2.28939	144	Intron (rna-XR_004936466.1/gene-Gm33332, intron 2 of 4)	10	19587421	19635785	48365	1	Il20ra	rna-XM_006512726.1	-15724
chr10	19725945	19726154	210	*	A_WT_peak_1478	49	5.00681	8.42381	4.91312	59	Exon (rna-XM_006512916.5/gene-Slc35d3, exon 2 of 3)	10	19723663	19727205	3543	2	Slc35d3	rna-NM_029529.3	1051
chr10	19753328	19753555	228	*	A_WT_peak_1479	15	3.48767	4.20623	1.54487	59	Intron (rna-NM_001161825.1/gene-Pex7, intron 7 of 8)	10	19723662	19728195	4534	2	Slc35d3	rna-XM_006512916.5	-25133
chr10	19783180	19783389	210	*	A_WT_peak_1480	31	4.28772	6.33811	3.12133	40	5' UTR	10	19735836	19783420	47585	2	Pex7	rna-NM_001161825.1	31
chr10	19809634	19809884	251	*	A_WT_peak_1481	22	3.78119	5.26695	2.28939	214	Promoter (<=1kb)	10	19809847	19991958	182112	1	Map3k5	rna-XM_006512739.5	0
chr10	19810492	19810697	206	*	A_WT_peak_1482	27	3.99493	5.85659	2.73778	8	Exon (rna-XM_006512739.5/gene-Map3k5, exon 1 of 22)	10	19810272	20018496	208225	1	Map3k5	rna-NM_008580.4	220
chr10	19816139	19816414	276	*	A_WT_peak_1483	30	4.38807	6.23933	3.03989	114	Intron (rna-XM_006512739.5/gene-Map3k5, intron 1 of 21)	10	19810272	20018496	208225	1	Map3k5	rna-NM_008580.4	5867
chr10	19918040	19918229	190	*	A_WT_peak_1484	15	3.51182	4.24286	1.571	147	Intron (rna-XM_006512739.5/gene-Map3k5, intron 7 of 21)	10	20024666	20157336	132671	1	Map7	rna-NM_001198635.1	-106437
chr10	20014462	20014616	155	*	A_WT_peak_1485	24	3.78612	5.50815	2.45864	37	Intron (rna-NM_008580.4/gene-Map3k5, intron 28 of 29)	10	20024666	20157336	132671	1	Map7	rna-NM_001198635.1	-10050
chr10	20036861	20037059	199	*	A_WT_peak_1486	24	4.04001	5.4501	2.41184	39	Intron (rna-NM_001198635.1/gene-Map7, intron 1 of 17)	10	20044963	20157269	112307	1	Map7	rna-XM_006512577.4	-7904
chr10	20115186	20115350	165	*	A_WT_peak_1487	26	3.90268	5.70323	2.61398	40	Intron (rna-NM_001198635.1/gene-Map7, intron 3 of 17)	10	20105508	20157269	51762	1	Map7	rna-XM_006512579.4	9678
chr10	20149200	20149408	209	*	A_WT_peak_1488	66	5.55474	10.4191	6.69722	54	Exon (rna-NM_001198635.1/gene-Map7, exon 12 of 18)	10	20154078	20162405	8328	2	Gm48249	rna-XR_003948991.1	12997
chr10	20160457	20160986	530	*	A_WT_peak_1489	19	3.37454	4.80626	1.94092	224	Intron (rna-XR_003948991.1/gene-Gm48249, intron 2 of 2)	10	20154078	20162405	8328	2	Gm48249	rna-XR_003948991.1	1419
chr10	20187759	20188685	927	*	A_WT_peak_1490	329	10.1828	38.3632	32.9187	363	Promoter (<=1kb)	10	20187897	20218390	30494	1	Bclaf1	rna-XM_006512865.5	0
chr10	20223354	20223772	419	*	A_WT_peak_1491	67	5.59561	10.4925	6.76352	113	Promoter (<=1kb)	10	20223491	20237404	13914	1	Mtfr2	rna-XM_006512858.5	0
chr10	20276273	20276451	179	*	A_WT_peak_1492	15	3.53632	4.28003	1.59645	146	Exon (rna-NM_001347366.1/gene-Pde7b, exon 12 of 12)	10	20240381	20242202	1822	2	Gm48537	gene-Gm48537	-34071
chr10	20423612	20423808	197	*	A_WT_peak_1493	26	4.21463	5.72302	2.63057	186	Exon (rna-NM_001347366.1/gene-Pde7b, exon 1 of 12)	10	20272798	20424074	151277	2	Pde7b	rna-NM_001347366.1	266
chr10	20427490	20427713	224	*	A_WT_peak_1494	46	5.1859	8.08491	4.61771	188	Intron (rna-XM_036155806.1/gene-Pde7b, intron 1 of 11)	10	20272798	20424074	151277	2	Pde7b	rna-NM_001347366.1	-3416
chr10	20575363	20575522	160	*	A_WT_peak_1495	20	3.81856	4.8937	2.00626	118	Intron (rna-XM_036155806.1/gene-Pde7b, intron 1 of 11)	10	20272798	20600604	327807	2	Pde7b	rna-XM_036155806.1	25082
chr10	20596521	20596711	191	*	A_WT_peak_1496	30	4.53239	6.21905	3.02288	92	Intron (rna-XM_036155806.1/gene-Pde7b, intron 1 of 11)	10	20272798	20600604	327807	2	Pde7b	rna-XM_036155806.1	3893
chr10	20632079	20632285	207	*	A_WT_peak_1497	22	3.87928	5.19819	2.23738	111	Distal Intergenic	10	20272798	20600824	328027	2	Pde7b	rna-NM_013875.6	-31255
chr10	20709217	20709383	167	*	A_WT_peak_1498	26	4.09189	5.76756	2.66575	60	Intron (rna-XR_380150.2/gene-Gm33510, intron 1 of 2)	10	20695664	20714548	18885	2	Gm33510	rna-XR_380150.2	5165
chr10	20828378	20828758	381	*	A_WT_peak_1499	127	7.53156	17.0233	12.7742	78	Promoter (<=1kb)	10	20828446	20956328	127883	1	Ahi1	rna-NM_001358561.1	0
chr10	20860468	20860618	151	*	A_WT_peak_1500	14	3.36053	4.01363	1.41118	29	Intron (rna-XR_003948741.2/gene-Ahi1, intron 13 of 23)	10	20828446	20956328	127883	1	Ahi1	rna-NM_026203.3	32022
chr10	20899047	20899229	183	*	A_WT_peak_1501	21	3.91018	5.0348	2.1122	13	Intron (rna-XR_003948741.2/gene-Ahi1, intron 17 of 23)	10	20916719	20956328	39610	1	Ahi1	rna-NM_001177776.1	-17490
chr10	20911405	20911626	222	*	A_WT_peak_1502	32	4.34901	6.43803	3.20402	172	Intron (rna-XR_003948741.2/gene-Ahi1, intron 17 of 23)	10	20916719	20956328	39610	1	Ahi1	rna-NM_001177776.1	-5093
chr10	21003970	21004185	216	*	A_WT_peak_1503	22	4.04896	5.24872	2.27552	52	Intron (rna-NM_001198914.1/gene-Myb, intron 15 of 15)	10	21000829	21036883	36055	2	Myb	rna-NM_001198914.1	32698
chr10	21133983	21134134	152	*	A_WT_peak_1504	52	5.60958	8.76723	5.21623	31	Distal Intergenic	10	21104405	21128141	23737	2	Gm33728	rna-XR_380154.3	-5842
chr10	21226165	21226390	226	*	A_WT_peak_1505	37	4.56777	7.07414	3.74319	165	Intron (rna-XM_036155898.1/gene-Hbs1l, intron 11 of 18)	10	21194987	21217954	22968	2	4930455C13Rik	rna-NR_045352.1	-8211
chr10	21248944	21249093	150	*	A_WT_peak_1506	39	4.89481	7.31772	3.9482	6	Intron (rna-XR_380156.4/gene-Gm33803, intron 2 of 2)	10	21243845	21250664	6820	2	Gm33803	rna-XR_380156.4	1571
chr10	21629600	21629851	252	*	A_WT_peak_1507	57	5.54729	9.33586	5.72184	183	Promoter (1-2kb)	10	21630854	21633613	2760	1	LOC118567832	rna-XR_004936469.1	-1003
chr10	21698692	21698939	248	*	A_WT_peak_1508	36	4.64093	6.91046	3.60381	75	Distal Intergenic	10	21709910	21722641	12732	2	Platr6	rna-XR_004936470.1	23702
chr10	21733871	21734049	179	*	A_WT_peak_1509	20	3.68743	4.89611	2.008	150	Exon (rna-XR_001779731.2/gene-Platr6, exon 2 of 6)	10	21709910	21737908	27999	2	Platr6	rna-XR_001779731.2	3859
chr10	21870148	21870477	330	*	A_WT_peak_1510	30	4.07122	6.23984	3.03989	218	Promoter (<=1kb)	10	21870565	21875802	5238	1	Sgk1	rna-NM_011361.3	-88
chr10	21934306	21935072	767	*	A_WT_peak_1511	101	7.22769	14.1702	10.1279	357	Promoter (<=1kb)	10	21930287	21934553	4267	2	Gm34267	rna-NR_168592.1	0
chr10	21953828	21954039	212	*	A_WT_peak_1512	46	5.39861	8.12057	4.64896	157	Distal Intergenic	10	21942208	21943978	1771	2	4930444G20Rik	rna-NM_053264.2	-9850
chr10	22025062	22025249	188	*	A_WT_peak_1513	30	4.23991	6.25998	3.05725	143	Promoter (<=1kb)	10	21988949	22025169	36221	2	E030030I06Rik	rna-NM_001254744.1	0
chr10	22348767	22349031	265	*	A_WT_peak_1514	16	3.58634	4.35599	1.64906	48	Distal Intergenic	10	22326387	22336853	10467	2	Gm40610	rna-XR_871506.1	-11914
chr10	22367012	22367182	171	*	A_WT_peak_1515	38	4.98563	7.18328	3.83141	115	Distal Intergenic	10	22326387	22336853	10467	2	Gm40610	rna-XR_871506.1	-30159
chr10	22607792	22608032	241	*	A_WT_peak_1516	36	4.46868	6.90954	3.60361	209	Promoter (<=1kb)	10	22579776	22607890	28115	2	Tbpl1	rna-XM_006512730.5	0
chr10	22619933	22620178	246	*	A_WT_peak_1517	16	3.62591	4.41615	1.65115	142	Distal Intergenic	10	22579776	22607890	28115	2	Tbpl1	rna-XM_006512730.5	-12043
chr10	22626114	22626285	172	*	A_WT_peak_1518	30	4.53239	6.21905	3.02288	99	Distal Intergenic	10	22579776	22607890	28115	2	Tbpl1	rna-XM_006512730.5	-18224
chr10	22725568	22725722	155	*	A_WT_peak_1519	16	3.62591	4.41615	1.65115	102	Distal Intergenic	10	22722906	22724571	1666	1	Gm51761	rna-XR_003948852.1	2662
chr10	23087760	23087909	150	*	A_WT_peak_1520	22	4.07915	5.29532	2.28939	33	Intron (rna-NM_001347372.1/gene-Eya4, intron 3 of 18)	10	22978861	23061667	82807	2	Eya4	rna-XM_030244878.2	-26093
chr10	23260424	23260579	156	*	A_WT_peak_1521	22	4.0063	5.18293	2.22534	55	Distal Intergenic	10	22978861	23226785	247925	2	Eya4	rna-XM_036155597.1	-33639
chr10	23663098	23663308	211	*	A_WT_peak_1522	84	5.98512	12.3572	8.45997	99	Promoter (<=1kb)	10	23661081	23663107	2027	2	Rps12	rna-NM_011295.6	0
chr10	24034919	24035091	173	*	A_WT_peak_1523	29	4.33351	6.15274	2.97975	3	Intron (rna-XM_006512801.5/gene-Stx7, intron 2 of 9)	10	24025215	24064859	39645	1	Stx7	rna-NM_016797.5	9704
chr10	24471788	24472366	579	*	A_WT_peak_1524	46	5.045	8.1682	4.69038	209	Promoter (<=1kb)	10	24207586	24471701	264116	2	Gm15270	rna-NR_163910.1	-87
chr10	24587632	24587894	263	*	A_WT_peak_1525	28	4.40504	6.0202	2.87101	215	5' UTR	10	24513812	24588057	74246	2	Enpp1	rna-NM_001308327.1	163
chr10	24745665	24746124	460	*	A_WT_peak_1526	58	5.06182	9.51797	5.8852	78	Promoter (<=1kb)	10	24745884	24789427	43544	1	Med23	rna-NM_001166416.1	0
chr10	25043696	25043904	209	*	A_WT_peak_1527	24	3.91936	5.49045	2.44496	107	Distal Intergenic	10	25017641	25029303	11663	2	Gm36313	rna-XR_004936491.1	-14393
chr10	25141825	25142032	208	*	A_WT_peak_1528	29	4.34702	6.1742	2.99698	8	Exon (rna-XR_004936610.1/gene-Gm25016, exon 1 of 1)	10	25141943	25142073	131	2	Gm25016	rna-XR_004936610.1	41
chr10	25156924	25157155	232	*	A_WT_peak_1529	37	4.89659	7.04282	3.71732	83	Intron (rna-XM_006512791.5/gene-Akap7, intron 3 of 7)	10	25044988	25151090	106103	2	Akap7	rna-XM_006512793.5	-5834
chr10	25174403	25174606	204	*	A_WT_peak_1530	13	3.06359	3.89618	1.33162	94	Promoter (<=1kb)	10	25174507	25182334	7828	1	Gm40617	rna-NR_166644.1	0
chr10	25303936	25304171	236	*	A_WT_peak_1531	17	3.46564	4.5442	1.74495	174	Intron (rna-XM_006512506.2/gene-Epb41l2, intron 1 of 21)	10	25308347	25399413	91067	1	Epb41l2	rna-XM_036155589.1	-4176
chr10	25474804	25474954	151	*	A_WT_peak_1532	16	3.56115	4.31773	1.6233	14	Intron (rna-NR_136909.1/gene-Gm29571, intron 3 of 3)	10	25491530	25497461	5932	2	Gm36908	rna-NR_156009.1	22507
chr10	25644979	25645540	562	*	A_WT_peak_1533	71	6.4947	10.8914	7.12578	261	Distal Intergenic	10	25574642	25590169	15528	2	Gm36543	rna-XR_380210.3	-54810
chr10	26212613	26212804	192	*	A_WT_peak_1534	20	3.87038	4.9735	2.0662	42	Intron (rna-XM_030245081.2/gene-L3mbtl3, intron 7 of 20)	10	26150366	26250068	99703	2	L3mbtl3	rna-NM_001347467.2	37264
chr10	26585378	26585582	205	*	A_WT_peak_1535	69	6.40716	10.7491	6.99569	58	Intron (rna-XR_003948859.1/gene-Gm48893, intron 1 of 1)	10	26571288	26624283	52996	1	Gm48893	rna-XR_003948859.1	14090
chr10	26648404	26648792	389	*	A_WT_peak_1536	42	4.93729	7.68122	4.26287	44	Promoter (<=1kb)	10	26648508	26794644	146137	1	Arhgap18	rna-NM_176837.2	0
chr10	26825598	26825869	272	*	A_WT_peak_1537	21	3.96453	5.11854	2.17623	77	Distal Intergenic	10	26841969	26842287	319	1	Gm30534	rna-XM_006512956.2	-16100
chr10	27492897	27493284	388	*	A_WT_peak_1538	28	4.38978	5.99639	2.85138	50	Promoter (<=1kb)	10	26857281	27492938	635658	2	Lama2	rna-NM_008481.2	0
chr10	28093799	28093953	155	*	A_WT_peak_1539	43	5.21357	7.82613	4.3901	48	Intron (rna-XM_011243143.4/gene-Ptprk, intron 2 of 33)	10	27950853	28473318	522466	1	Ptprk	rna-XM_006512617.2	142946
chr10	29189287	29189480	194	*	A_WT_peak_1540	38	4.78698	7.14508	3.8041	48	Promoter (<=1kb)	10	29163243	29189413	26171	2	Gm46218	rna-XR_001779751.3	0
chr10	29206492	29206664	173	*	A_WT_peak_1541	27	4.31506	5.87978	2.75647	118	Intron (rna-XM_006512797.4/gene-Echdc1, intron 3 of 5)	10	29189496	29222657	33162	1	Echdc1	rna-NM_025855.4	16996
chr10	29237604	29238335	732	*	A_WT_peak_1542	88	6.67597	12.7865	8.85356	151	5' UTR	10	29220172	29238438	18267	2	Rnf146	rna-NM_001110196.1	103
chr10	29410303	29410498	196	*	A_WT_peak_1543	22	3.99228	5.16131	2.20837	157	Intron (rna-NM_028351.3/gene-Rspo3, intron 1 of 4)	10	29329102	29411863	82762	2	Rspo3	rna-NM_028351.3	1365
chr10	30076448	30076664	217	*	A_WT_peak_1544	46	5.41784	8.15116	4.67553	53	Promoter (<=1kb)	10	30072005	30076536	4532	2	Cenpw	rna-NM_001109747.1	0
chr10	30404241	30404407	167	*	A_WT_peak_1545	22	4.07915	5.29532	2.28939	17	Distal Intergenic	10	30369938	30370044	107	1	Gm22623	rna-XR_004936633.1	34303
chr10	30476853	30477018	166	*	A_WT_peak_1546	33	4.43783	6.58233	3.32588	16	Promoter (<=1kb)	10	30410218	30476711	66494	2	Trmt11	rna-XM_006512880.5	-142
chr10	30494080	30494561	482	*	A_WT_peak_1547	111	8.14318	15.261	11.1373	395	Promoter (<=1kb)	10	30484203	30494362	10160	2	Hint3	rna-NM_025798.3	0
chr10	30718785	30718966	182	*	A_WT_peak_1548	102	7.55561	14.2827	10.2319	113	Promoter (<=1kb)	10	30708355	30718779	10425	2	Hey2	rna-NM_013904.1	-6
chr10	30720225	30720425	201	*	A_WT_peak_1549	22	3.89118	5.21689	2.25186	185	Promoter (1-2kb)	10	30708355	30718779	10425	2	Hey2	rna-NM_013904.1	-1446
chr10	31189153	31189592	440	*	A_WT_peak_1550	78	6.53477	11.7295	7.88763	225	Promoter (<=1kb)	10	31189296	31194049	4754	1	Hddc2	rna-XM_036155987.1	0
chr10	31468752	31468916	165	*	A_WT_peak_1551	31	4.45822	6.35051	3.13162	142	Intron (rna-NM_001146349.1/gene-Rnf217, intron 1 of 5)	10	31377883	31485721	107839	2	Rnf217	rna-NM_001146349.1	16805
chr10	32766672	32766926	255	*	A_WT_peak_1552	22	4.07915	5.29532	2.28939	4	Promoter (<=1kb)	10	31826575	32765911	939337	2	Nkain2	rna-NM_001025286.2	-761
chr10	33840103	33840724	622	*	A_WT_peak_1553	47	5.43887	8.18462	4.70202	392	Intron (rna-XR_004936492.1/gene-LOC118567835, intron 1 of 2)	10	33848749	33849584	836	2	Gm7940	gene-Gm7940	8860
chr10	33856637	33856842	206	*	A_WT_peak_1554	21	3.9508	5.09739	2.16018	183	Distal Intergenic	10	33848749	33849584	836	2	Gm7940	gene-Gm7940	-7053
chr10	33895255	33895871	617	*	A_WT_peak_1555	171	8.92757	21.6851	17.1316	476	Promoter (<=1kb)	10	33872551	33895612	23062	2	Rwdd1	rna-NM_025614.3	0
chr10	34083269	34083506	238	*	A_WT_peak_1556	38	4.65816	7.22355	3.8658	185	Promoter (<=1kb)	10	34027385	34083231	55847	2	Dse	rna-NM_172508.3	-38
chr10	34158160	34158446	287	*	A_WT_peak_1557	59	5.73122	9.64126	5.99612	34	Promoter (<=1kb)	10	34158186	34160881	2696	1	Tspyl1	rna-NM_009433.3	0
chr10	34294257	34294634	378	*	A_WT_peak_1558	82	6.50492	12.0808	8.20815	185	Promoter (<=1kb)	10	34179605	34294547	114943	2	Nt5dc1	rna-NM_001347463.1	0
chr10	36651147	36651506	360	*	A_WT_peak_1559	38	4.98563	7.18328	3.83141	193	Intron (rna-XM_006512761.4/gene-Hs3st5, intron 3 of 4)	10	36651781	36651927	147	2	Gm22554	rna-XR_004936582.1	421
chr10	36793983	36794178	196	*	A_WT_peak_1560	23	4.01442	5.41005	2.37998	13	Distal Intergenic	10	36850293	36877885	27593	1	Hdac2	rna-XM_030244890.1	-56115
chr10	36850218	36850624	407	*	A_WT_peak_1561	123	7.28903	16.5641	12.3451	214	Promoter (<=1kb)	10	36850293	36877885	27593	1	Hdac2	rna-XM_030244890.1	0
chr10	36898563	36898738	176	*	A_WT_peak_1562	22	4.07915	5.29532	2.28939	9	Distal Intergenic	10	36851085	36877885	26801	1	Hdac2	rna-XM_017313806.2	47478
chr10	37038520	37038676	157	*	A_WT_peak_1563	30	4.53239	6.21905	3.02288	114	Distal Intergenic	10	37018466	37027981	9516	1	5930403N24Rik	rna-NR_166106.1	20054
chr10	38964803	38964961	159	*	A_WT_peak_1564	16	3.62591	4.41615	1.65115	110	Exon (rna-NM_010681.4/gene-Lama4, exon 30 of 38)	10	38994800	39009896	15097	2	Fam229b	rna-NM_001359442.1	44935
chr10	39088973	39089177	205	*	A_WT_peak_1565	23	4.01442	5.41005	2.37998	184	Distal Intergenic	10	39074432	39075593	1162	1	Gm6477	gene-Gm6477	14541
chr10	39245480	39245793	314	*	A_WT_peak_1566	116	6.66128	15.7826	11.6198	91	Promoter (<=1kb)	10	39245735	39441157	195423	1	Fyn	rna-XM_036155614.1	0
chr10	39350833	39351001	169	*	A_WT_peak_1567	26	3.94315	5.77061	2.66781	2	Intron (rna-XM_036155614.1/gene-Fyn, intron 3 of 12)	10	39327522	39441157	113636	1	Fyn	rna-XM_036155605.1	23311
chr10	39390709	39390959	251	*	A_WT_peak_1568	31	3.87437	6.40702	3.17881	186	Intron (rna-XM_036155614.1/gene-Fyn, intron 4 of 12)	10	39327522	39441157	113636	1	Fyn	rna-XM_036155605.1	63187
chr10	39530301	39530553	253	*	A_WT_peak_1569	34	4.54388	6.75397	3.4709	206	3' UTR	10	39535938	39539479	3542	1	Gm8899	gene-Gm8899	-5385
chr10	39607217	39608144	928	*	A_WT_peak_1570	70	4.84488	10.7713	7.01563	80	Promoter (<=1kb)	10	39497407	39608003	110597	2	E130307A14Rik	rna-NR_038037.1	0
chr10	39608557	39608741	185	*	A_WT_peak_1571	57	4.5136	9.40186	5.78111	151	5' UTR	10	39608156	39751202	143047	1	Rev3l	rna-NM_011264.3	401
chr10	39866033	39866442	410	*	A_WT_peak_1572	57	5.38313	9.40461	5.78346	180	Distal Intergenic	10	39844149	39862642	18494	2	Mfsd4b5	rna-NM_001113385.1	-3391
chr10	40018080	40018392	313	*	A_WT_peak_1573	124	7.10656	16.6744	12.4475	257	Promoter (<=1kb)	10	39909528	40018262	108735	2	Slc16a10	rna-XR_380076.5	0
chr10	40088574	40089152	579	*	A_WT_peak_1574	41	5.07443	7.60449	4.197	85	Distal Intergenic	10	40099242	40122975	23734	2	Rpf2	rna-NM_001042556.1	33823
chr10	40134521	40134866	346	*	A_WT_peak_1575	65	5.10343	10.2848	6.57606	243	Exon (rna-NR_002842.2/gene-Snord3a, exon 1 of 1)	10	40134464	40134675	212	1	Snord3a	rna-NR_002842.2	57
chr10	40167296	40167447	152	*	A_WT_peak_1576	35	4.45659	6.88941	3.58604	112	Intron (rna-NM_009665.5/gene-Amd1, intron 5 of 7)	10	40163454	40178184	14731	2	Amd1	rna-NM_009665.5	10737
chr10	40178167	40178321	155	*	A_WT_peak_1577	90	5.7103	12.9914	9.04187	71	Promoter (<=1kb)	10	40163454	40178184	14731	2	Amd1	rna-NM_009665.5	0
chr10	40183994	40184226	233	*	A_WT_peak_1578	18	3.43639	4.70174	1.86291	4	Distal Intergenic	10	40163454	40178184	14731	2	Amd1	rna-NM_009665.5	-5810
chr10	40220343	40220609	267	*	A_WT_peak_1579	28	3.541	6.00781	2.86043	68	Distal Intergenic	10	40225283	40359814	134532	1	Cdk19	rna-XM_030245390.1	-4674
chr10	40224835	40225351	517	*	A_WT_peak_1580	167	7.07755	21.286	16.757	364	Promoter (<=1kb)	10	40225283	40359814	134532	1	Cdk19	rna-XM_030245390.1	0
chr10	40328161	40328333	173	*	A_WT_peak_1581	21	3.77529	5.03468	2.1122	22	Promoter (1-2kb)	10	40330078	40342623	12546	1	Gm32234	rna-XM_011243251.2	-1745
chr10	40370407	40370665	259	*	A_WT_peak_1582	25	4.00952	5.63551	2.56073	235	Distal Intergenic	10	40330078	40342623	12546	1	Gm32234	rna-XM_011243251.2	40329
chr10	40425226	40425490	265	*	A_WT_peak_1583	34	4.69859	6.73046	3.45106	181	Distal Intergenic	10	40446317	40480126	33810	1	Slc22a16	rna-XM_006512850.4	-20827
chr10	40534924	40535120	197	*	A_WT_peak_1584	22	4.07915	5.29532	2.28939	159	Intron (rna-XM_036156003.1/gene-Ddo, intron 4 of 4)	10	40558447	40687080	128634	1	Mettl24	rna-XM_030245130.2	-23327
chr10	40548526	40548781	256	*	A_WT_peak_1585	45	4.93281	7.98115	4.52639	137	Intron (rna-XM_036156003.1/gene-Ddo, intron 4 of 4)	10	40558447	40687080	128634	1	Mettl24	rna-XM_030245130.2	-9666
chr10	40758920	40759832	913	*	A_WT_peak_1586	207	8.43935	25.5116	20.7318	636	Promoter (<=1kb)	10	40707617	40759139	51523	2	Cdc40	rna-NM_027879.2	0
chr10	40779246	40779440	195	*	A_WT_peak_1587	16	3.62591	4.41615	1.65115	47	Intron (rna-XM_030245406.1/gene-Wasf1, intron 1 of 8)	10	40759823	40814565	54743	1	Wasf1	rna-NM_001379454.1	19423
chr10	40787545	40787770	226	*	A_WT_peak_1588	28	4.38978	5.99639	2.85138	32	Intron (rna-XM_030245406.1/gene-Wasf1, intron 1 of 8)	10	40759823	40814565	54743	1	Wasf1	rna-NM_001379454.1	27722
chr10	40794395	40794656	262	*	A_WT_peak_1589	30	4.53239	6.21905	3.02288	233	Intron (rna-XM_030245406.1/gene-Wasf1, intron 1 of 8)	10	40759823	40814565	54743	1	Wasf1	rna-NM_001379454.1	34572
chr10	40832654	40832902	249	*	A_WT_peak_1590	28	4.38978	5.99639	2.85138	190	Distal Intergenic	10	40759823	40814565	54743	1	Wasf1	rna-NM_001379454.1	72831
chr10	40838113	40838334	222	*	A_WT_peak_1591	20	3.81856	4.8937	2.00626	209	Distal Intergenic	10	40911051	40913210	2160	1	Gm48057	rna-XR_003949056.1	-72717
chr10	40916646	40917117	472	*	A_WT_peak_1592	114	6.78931	15.5959	11.4465	179	Distal Intergenic	10	40911051	40913210	2160	1	Gm48057	rna-XR_003949056.1	5595
chr10	40922011	40922211	201	*	A_WT_peak_1593	24	4.09218	5.5317	2.47733	121	Distal Intergenic	10	40923722	40925121	1400	2	Gm19611	gene-Gm19611	2910
chr10	40947012	40947202	191	*	A_WT_peak_1594	18	3.54313	4.66754	1.83651	38	Exon (rna-NM_199058.2/gene-Gpr6, exon 2 of 2)	10	40945973	40948286	2314	2	Gpr6	rna-NM_199058.2	1084
chr10	40947846	40948146	301	*	A_WT_peak_1595	24	3.91936	5.49045	2.44496	14	5' UTR	10	40945973	40948286	2314	2	Gpr6	rna-NM_199058.2	140
chr10	40974065	40974218	154	*	A_WT_peak_1596	21	3.82081	5.10632	2.16622	115	Downstream (<=300bp)	10	40958812	40973906	15095	1	Gm32284	rna-XR_380256.3	15253
chr10	41073388	41073946	559	*	A_WT_peak_1597	68	6.05851	10.5481	6.81433	219	Intron (rna-NM_133999.1/gene-Fig4, intron 22 of 22)	10	41092041	41092172	132	1	Gm25526	rna-XR_004936589.1	-18095
chr10	41179077	41179305	229	*	A_WT_peak_1598	61	5.23606	9.8402	6.17504	192	Promoter (<=1kb)	10	41064168	41179237	115070	2	Fig4	rna-NM_133999.1	0
chr10	41326077	41326627	551	*	A_WT_peak_1599	36	4.18108	6.97113	3.65622	350	Promoter (<=1kb)	10	41326354	41329465	3112	1	Zbtb24	rna-NM_001277230.1	0
chr10	41366084	41366471	388	*	A_WT_peak_1600	67	5.01534	10.4536	6.72857	41	Promoter (<=1kb)	10	41366414	41383437	17024	1	Ppil6	rna-XR_380080.5	0
chr10	41394883	41395562	680	*	A_WT_peak_1601	192	8.21096	23.9376	19.2515	364	Promoter (<=1kb)	10	41395496	41407038	11543	1	Cd164	rna-NM_016898.2	0
chr10	41575482	41575646	165	*	A_WT_peak_1602	18	3.67111	4.66658	1.83626	115	Intron (rna-XR_003948818.2/gene-Ccdc162, intron 1 of 46)	10	41414840	41592459	177620	2	Ccdc162	rna-NM_001358562.1	16813
chr10	41685945	41686534	590	*	A_WT_peak_1603	76	5.53694	11.4961	7.67459	439	Promoter (<=1kb)	10	41594837	41686130	91294	2	Cep57l1	rna-XM_036155471.1	0
chr10	41763200	41763679	480	*	A_WT_peak_1604	54	5.16383	9.02476	5.44522	118	Promoter (<=1kb)	10	41763435	41784432	20998	1	Sesn1	rna-NM_001013370.2	0
chr10	41806343	41806520	178	*	A_WT_peak_1605	65	5.29603	10.3041	6.59308	108	Intron (rna-XR_003948649.2/gene-Armc2, intron 12 of 19)	10	41834903	41839099	4197	1	Gm33058	rna-XR_380265.4	-28383
chr10	41894213	41894423	211	*	A_WT_peak_1606	40	4.6364	7.48166	4.09049	181	Promoter (<=1kb)	10	41784284	41894271	109988	2	Armc2	rna-XR_003948649.2	0
chr10	41949625	41950169	545	*	A_WT_peak_1607	24	3.94152	5.52615	2.4728	166	Exon (rna-XR_004936499.1/gene-Gm40630, exon 2 of 5)	10	41932712	41957942	25231	2	Gm40630	rna-XR_004936499.1	7773
chr10	41976489	41976659	171	*	A_WT_peak_1608	37	4.37359	7.03139	3.70781	107	Distal Intergenic	10	41932712	41957942	25231	2	Gm40630	rna-XR_004936499.1	-18547
chr10	42044590	42044765	176	*	A_WT_peak_1609	26	4.09189	5.76756	2.66575	162	Distal Intergenic	10	41932712	41957942	25231	2	Gm40630	rna-XR_004936499.1	-86648
chr10	42120012	42120380	369	*	A_WT_peak_1610	20	3.57746	4.93441	2.03626	178	Intron (rna-NM_001376967.1/gene-Foxo3, intron 2 of 3)	10	42123432	42150198	26767	2	Gm38485	rna-XR_380269.2	29818
chr10	42152937	42153210	274	*	A_WT_peak_1611	21	2.92236	5.08543	2.15182	67	Promoter (<=1kb)	10	42057841	42152691	94851	2	Foxo3	rna-NM_019740.3	-246
chr10	42153674	42154103	430	*	A_WT_peak_1612	80	4.62287	11.8891	8.03402	115	Promoter (<=1kb)	10	42057841	42152691	94851	2	Foxo3	rna-NM_019740.3	-983
chr10	42186261	42186725	465	*	A_WT_peak_1613	47	4.52939	8.19801	4.71376	306	Distal Intergenic	10	42057841	42152691	94851	2	Foxo3	rna-NM_019740.3	-33570
chr10	42230877	42231033	157	*	A_WT_peak_1614	33	4.45081	6.60339	3.34404	111	Intron (rna-XM_006512700.4/gene-Afg1l, intron 4 of 8)	10	42188577	42293200	104624	2	Afg1l	rna-XM_006512700.4	62167
chr10	42354017	42354608	592	*	A_WT_peak_1615	60	4.82194	9.72333	6.07049	208	Promoter (<=1kb)	10	42188577	42354252	165676	2	Afg1l	rna-XM_006512698.1	0
chr10	42376012	42376300	289	*	A_WT_peak_1616	35	3.60672	6.86167	3.56291	267	Promoter (1-2kb)	10	42378050	42411365	33316	1	Snx3	rna-NM_017472.4	-1750
chr10	42377826	42378210	385	*	A_WT_peak_1617	108	5.70136	14.9288	10.8277	294	Promoter (<=1kb)	10	42378050	42411365	33316	1	Snx3	rna-NM_017472.4	0
chr10	42476399	42476566	168	*	A_WT_peak_1618	17	3.57897	4.52452	1.73038	29	Distal Intergenic	10	42459788	42461819	2032	1	Gm38491	rna-NR_169130.1	16611
chr10	42549164	42549319	156	*	A_WT_peak_1619	17	3.47514	4.55935	1.75598	4	Distal Intergenic	10	42554912	42578458	23547	1	Ostm1	rna-NM_172416.3	-5593
chr10	42637294	42637783	490	*	A_WT_peak_1620	105	6.30316	14.6213	10.5444	151	Promoter (<=1kb)	10	42637492	42708510	71019	1	Sec63	rna-NM_001359283.1	0
chr10	42716154	42716421	268	*	A_WT_peak_1621	35	4.11769	6.85581	3.55784	59	Distal Intergenic	10	42731715	42734941	3227	1	LOC118567838	rna-XR_004936500.1	-15294
chr10	42742452	42742643	192	*	A_WT_peak_1622	46	4.66498	8.14037	4.66609	110	Promoter (1-2kb)	10	42738402	42740989	2588	2	Gm34006	rna-XR_380280.5	-1463
chr10	42848870	42849019	150	*	A_WT_peak_1623	57	5.59627	9.4174	5.79509	70	Intron (rna-NR_153349.1/gene-Gm5079, intron 2 of 2)	10	42851756	42855363	3608	2	LOC115485727	rna-XR_003948864.1	6344
chr10	43050969	43051322	354	*	A_WT_peak_1624	35	4.29942	6.90287	3.59809	333	5' UTR	10	43050695	43052561	1867	1	9030612E09Rik	rna-NR_102361.1	274
chr10	43097165	43097617	453	*	A_WT_peak_1625	136	8.048	17.9805	13.6645	241	Promoter (<=1kb)	10	43097482	43316244	218763	1	Pdss2	rna-NM_027772.2	0
chr10	43103188	43103421	234	*	A_WT_peak_1626	28	4.2156	5.96514	2.82577	104	Intron (rna-XR_871439.4/gene-Pdss2, intron 1 of 7)	10	43097482	43340878	243397	1	Pdss2	rna-NM_001168289.1	5706
chr10	43197367	43197566	200	*	A_WT_peak_1627	20	3.70901	4.93019	2.03393	125	Intron (rna-XR_871439.4/gene-Pdss2, intron 2 of 7)	10	43196194	43218506	22313	2	Gm40631	rna-XR_871611.3	20940
chr10	43407597	43407766	170	*	A_WT_peak_1628	30	4.08131	6.25704	3.05474	164	Intron (rna-NM_026411.2/gene-Mtres1, intron 2 of 3)	10	43401129	43410070	8942	2	Mtres1	rna-XM_017314069.2	2304
chr10	43416702	43417121	420	*	A_WT_peak_1629	62	5.07293	9.88035	6.21121	251	Promoter (<=1kb)	10	43401115	43417014	15900	2	Mtres1	rna-NM_026411.2	0
chr10	43617562	43617861	300	*	A_WT_peak_1630	23	3.86504	5.40276	2.37425	244	Exon (rna-XR_871618.3/gene-Gm40634, exon 3 of 3)	10	43617305	43619056	1752	2	Gm40634	rna-XR_871618.3	1195
chr10	43757970	43758124	155	*	A_WT_peak_1631	26	4.24285	5.76707	2.66575	87	Exon (rna-XR_380090.2/gene-Qrsl1, exon 8 of 10)	10	43750186	43777732	27547	2	Qrsl1	rna-NM_001081054.2	19608
chr10	43777543	43777797	255	*	A_WT_peak_1632	40	4.58845	7.40007	4.0198	180	Promoter (<=1kb)	10	43750184	43777738	27555	2	Qrsl1	rna-XR_380090.2	0
chr10	43947166	43947323	158	*	A_WT_peak_1633	16	3.59907	4.37534	1.65115	17	Intron (rna-NM_001368305.1/gene-Crybg1, intron 1 of 21)	10	43826627	43898271	71645	2	Crybg1	rna-NM_001368306.1	-48895
chr10	44006384	44006558	175	*	A_WT_peak_1634	18	3.68296	4.68484	1.84941	106	Intron (rna-NM_001368305.1/gene-Crybg1, intron 1 of 21)	10	43826627	44024824	198198	2	Crybg1	rna-NM_001368305.1	18266
chr10	44024719	44025080	362	*	A_WT_peak_1635	67	5.37883	10.4595	6.73377	179	Promoter (<=1kb)	10	43826627	44024824	198198	2	Crybg1	rna-NM_001368305.1	0
chr10	44144099	44144592	494	*	A_WT_peak_1636	130	7.19374	17.312	13.04	404	Promoter (<=1kb)	10	44144325	44195554	51230	1	Atg5	rna-XM_017313783.3	0
chr10	44149814	44150075	262	*	A_WT_peak_1637	37	4.71282	7.02607	3.70303	10	Intron (rna-XM_017313783.3/gene-Atg5, intron 1 of 5)	10	44143738	44144335	598	2	Gm40637	rna-XR_871625.3	-5479
chr10	44298478	44298691	214	*	A_WT_peak_1638	45	4.97429	8.05043	4.58724	47	Intron (rna-XR_380289.5/gene-Gm35028, intron 1 of 2)	10	44295953	44300359	4407	2	Gm35028	rna-XR_380289.5	1668
chr10	44317538	44317795	258	*	A_WT_peak_1639	17	3.56778	4.50726	1.71836	40	Exon (rna-XM_006512504.4/gene-Prdm1, exon 3 of 5)	10	44313170	44326065	12896	2	Prdm1	rna-XM_006512504.4	8270
chr10	44774150	44774415	266	*	A_WT_peak_1640	47	5.43887	8.18462	4.70202	217	Distal Intergenic	10	44778713	44819372	40660	2	Gm40638	rna-XR_871626.1	44957
chr10	45195213	45195363	151	*	A_WT_peak_1641	46	5.23532	8.16482	4.68746	42	Distal Intergenic	10	45211783	45248580	36798	1	Bves	rna-XM_036155783.1	-16420
chr10	45217923	45218096	174	*	A_WT_peak_1642	30	4.25176	6.27936	3.0729	54	Intron (rna-XM_036155783.1/gene-Bves, intron 1 of 6)	10	45211987	45248580	36594	1	Bves	rna-XM_006512737.3	5936
chr10	45361932	45362756	825	*	A_WT_peak_1643	71	6.04021	10.8945	7.1286	600	Promoter (<=1kb)	10	45252713	45362031	109319	2	Lin28b	rna-XM_011243180.4	0
chr10	45453993	45454383	391	*	A_WT_peak_1644	45	4.91914	7.95828	4.50588	55	Promoter (<=1kb)	10	45454017	45588368	134352	1	Hace1	rna-XM_036155718.1	0
chr10	45492179	45492494	316	*	A_WT_peak_1645	34	4.54388	6.75397	3.4709	156	Intron (rna-XR_380059.4/gene-Hace1, intron 5 of 21)	10	45491169	45588368	97200	1	Hace1	rna-XM_030244983.2	1010
chr10	45557192	45557355	164	*	A_WT_peak_1646	41	4.83587	7.51553	4.11995	43	Intron (rna-XR_380059.4/gene-Hace1, intron 20 of 21)	10	45491169	45588368	97200	1	Hace1	rna-XM_030244983.2	66023
chr10	49322050	49322230	181	*	A_WT_peak_1647	22	4.07915	5.29532	2.28939	116	Intron (rna-NM_001358866.2/gene-Grik2, intron 7 of 16)	10	49094586	49101749	7164	2	A730099G02Rik	rna-XR_004936508.1	-220301
chr10	50468839	50469075	237	*	A_WT_peak_1648	106	7.52816	14.6852	10.6031	167	5' UTR	10	50468811	50727300	258490	1	Ascc3	rna-XM_030245389.2	28
chr10	50722236	50722402	167	*	A_WT_peak_1649	22	4.07915	5.29532	2.28939	59	Intron (rna-XM_030245388.2/gene-Ascc3, intron 39 of 40)	10	50765251	50770630	5380	2	A230054N11Rik	rna-XR_871640.2	48228
chr10	50770982	50771476	495	*	A_WT_peak_1650	40	4.77976	7.42359	4.03981	83	5' UTR	10	50770794	50865252	94459	1	Sim1	rna-XM_006512627.4	188
chr10	50859878	50860099	222	*	A_WT_peak_1651	38	4.98563	7.18328	3.83141	128	Exon (rna-XM_006512626.4/gene-Sim1, exon 13 of 13)	10	50784612	50865252	80641	1	Sim1	rna-XM_006512631.1	75266
chr10	51548326	51548552	227	*	A_WT_peak_1652	28	4.2672	6.04732	2.89303	43	Distal Intergenic	10	51553856	51606525	52670	1	Rfx6	rna-NM_001159389.1	-5304
chr10	51554026	51554219	194	*	A_WT_peak_1653	22	4.07915	5.29532	2.28939	84	Exon (rna-NM_001159389.1/gene-Rfx6, exon 1 of 19)	10	51553856	51606525	52670	1	Rfx6	rna-NM_001159389.1	170
chr10	52108759	52109209	451	*	A_WT_peak_1654	42	4.90788	7.63324	4.22125	356	Promoter (<=1kb)	10	52109674	52197474	87801	1	Dcbld1	rna-XM_011243196.2	-465
chr10	52257700	52258527	828	*	A_WT_peak_1655	107	6.83161	14.7902	10.7009	627	Promoter (<=1kb)	10	52213120	52258220	45101	2	Gopc	rna-NM_001199272.1	0
chr10	52293390	52293913	524	*	A_WT_peak_1656	131	7.01766	17.4171	13.1376	169	Promoter (<=1kb)	10	52293643	52316288	22646	1	Nus1	rna-NM_030250.2	0
chr10	52567461	52567640	180	*	A_WT_peak_1657	30	4.51486	6.19167	3.01122	164	Intron (rna-NM_178675.4/gene-Slc35f1, intron 1 of 7)	10	52566597	52987718	421122	1	Slc35f1	rna-NM_178675.4	864
chr10	53147866	53148044	179	*	A_WT_peak_1658	30	4.53239	6.21905	3.02288	49	Distal Intergenic	10	53156366	53159783	3418	1	Gm19395	rna-NR_038015.1	-8322
chr10	53255811	53256048	238	*	A_WT_peak_1659	79	6.34219	11.8019	7.95455	182	Promoter (<=1kb)	10	53149539	53255979	106441	2	Cep85l	rna-NM_001204983.2	0
chr10	53259679	53260036	358	*	A_WT_peak_1660	30	4.06119	6.22271	3.02539	299	Promoter (2-3kb)	10	53149633	53256765	107133	2	Cep85l	rna-XM_036155444.1	-2914
chr10	53456828	53457193	366	*	A_WT_peak_1661	84	6.67622	12.3723	8.47403	184	5' UTR	10	53412411	53457213	44803	2	Mcm9	rna-XM_011243206.2	20
chr10	53472692	53473079	388	*	A_WT_peak_1662	141	7.31167	18.4956	14.1434	227	Promoter (<=1kb)	10	53473057	53485321	12265	1	Asf1a	rna-NM_025541.3	0
chr10	53505488	53506339	852	*	A_WT_peak_1663	76	5.14408	11.4217	7.60695	687	Promoter (<=1kb)	10	53412411	53506053	93643	2	Mcm9	rna-NM_027830.3	0
chr10	53783691	53783840	150	*	A_WT_peak_1664	30	4.53239	6.21905	3.02288	148	Intron (rna-NM_008548.5/gene-Man1a, intron 12 of 12)	10	53865643	53871040	5398	2	LOC118567782	rna-XR_004936319.1	87200
chr10	53937386	53937591	206	*	A_WT_peak_1665	44	5.2315	7.85468	4.41465	97	Intron (rna-NM_008548.5/gene-Man1a, intron 2 of 12)	10	53780881	53951833	170953	2	Man1a	rna-NM_008548.5	14242
chr10	55991856	55992014	159	*	A_WT_peak_1666	24	3.95269	5.54414	2.4872	18	Exon (rna-XM_006512876.4/gene-Msl3l2, exon 3 of 3)	10	55983013	55992976	9964	1	Msl3l2	rna-NM_001163833.1	8843
chr10	56012847	56013051	205	*	A_WT_peak_1667	30	4.53239	6.21905	3.02288	42	Intron (rna-NM_001033385.3/gene-Tbc1d32, intron 20 of 32)	10	55983013	55992976	9964	1	Msl3l2	rna-NM_001163833.1	29834
chr10	56104838	56105088	251	*	A_WT_peak_1668	75	6.7965	11.3811	7.57075	73	Promoter (<=1kb)	10	55890389	56104785	214397	2	Tbc1d32	rna-NM_001033385.3	-53
chr10	56219180	56219348	169	*	A_WT_peak_1669	45	5.30448	7.97081	4.51681	65	Distal Intergenic	10	56230505	56231196	692	2	Rps8-ps1	gene-Rps8-ps1	11848
chr10	56329576	56330059	484	*	A_WT_peak_1670	40	4.99118	7.47168	4.08144	185	Intron (rna-NR_152768.1/gene-Gm36595, intron 4 of 5)	10	56308077	56352063	43987	1	Gm36595	rna-NR_152769.1	21499
chr10	56350946	56351178	233	*	A_WT_peak_1671	22	4.06338	5.27097	2.28939	80	Exon (rna-NR_152768.1/gene-Gm36595, exon 6 of 6)	10	56373344	56374396	1053	1	Gm9118	gene-Gm9118	-22166
chr10	57362131	57362424	294	*	A_WT_peak_1672	127	7.49593	16.9562	12.7114	179	5' UTR	10	57354479	57362449	7971	2	4930467K11Rik	rna-NR_045353.1	25
chr10	57408394	57408687	294	*	A_WT_peak_1673	65	6.34535	10.2875	6.57794	244	Promoter (<=1kb)	10	57391870	57408625	16756	2	Serinc1	rna-NM_019760.3	0
chr10	57739484	57739636	153	*	A_WT_peak_1674	40	4.58845	7.40007	4.0198	87	Distal Intergenic	10	57745783	57746992	1210	1	LOC118567784	gene-LOC118567784	-6147
chr10	57981626	57982147	522	*	A_WT_peak_1675	189	10.958	23.6023	18.9365	192	Promoter (2-3kb)	10	57976722	57978758	2037	2	LOC118567785	gene-LOC118567785	-2868
chr10	57982424	57982838	415	*	A_WT_peak_1676	54	5.54988	8.9994	5.42321	314	Distal Intergenic	10	57976722	57978758	2037	2	LOC118567785	gene-LOC118567785	-3666
chr10	57993110	57993359	250	*	A_WT_peak_1677	46	5.00234	8.09719	4.6286	192	Distal Intergenic	10	57986385	57990060	3676	2	LOC118567813	rna-XM_036156149.1	-3050
chr10	58011708	58011875	168	*	A_WT_peak_1678	42	3.35072	7.61661	4.20699	79	Distal Intergenic	10	57986385	57990060	3676	2	LOC118567813	rna-XM_036156149.1	-21648
chr10	58022437	58022621	185	*	A_WT_peak_1679	40	4.79366	7.44639	4.05966	68	Distal Intergenic	10	57986385	57990060	3676	2	LOC118567813	rna-XM_036156149.1	-32377
chr10	58091179	58091550	372	*	A_WT_peak_1680	34	4.50353	6.68874	3.41571	365	Promoter (<=1kb)	10	58091217	58126282	35066	1	Gcc2	rna-XR_004936270.1	0
chr10	58141767	58141974	208	*	A_WT_peak_1681	20	3.69819	4.9131	2.02044	90	Distal Intergenic	10	58159164	58260511	101348	1	Lims1	rna-XM_030244824.1	-17190
chr10	58158713	58159694	982	*	A_WT_peak_1682	327	9.25414	38.1898	32.7531	485	Promoter (<=1kb)	10	58159164	58260511	101348	1	Lims1	rna-XM_030244824.1	0
chr10	58207281	58207534	254	*	A_WT_peak_1683	33	4.2607	6.56115	3.30767	207	5' UTR	10	58207276	58260513	53238	1	Lims1	rna-NM_201242.1	5
chr10	58282592	58283371	780	*	A_WT_peak_1684	240	10.0821	29.0807	24.0968	92	Promoter (<=1kb)	10	58282674	58329977	47304	1	Ranbp2	rna-NM_011240.3	0
chr10	58333566	58334079	514	*	A_WT_peak_1685	156	7.84465	20.0817	15.627	260	Promoter (<=1kb)	10	58333753	58412066	78314	1	Ccdc138	rna-XR_004936298.1	0
chr10	58341692	58341881	190	*	A_WT_peak_1686	24	4.05292	5.47031	2.42885	29	Intron (rna-XR_004936299.1/gene-Ccdc138, intron 3 of 14)	10	58333787	58412066	78280	1	Ccdc138	rna-XM_036156074.1	7905
chr10	58438348	58438560	213	*	A_WT_peak_1687	34	4.33924	6.69321	3.41899	151	3' UTR	10	58436602	58465951	29350	2	Edar	rna-XM_030244869.1	27391
chr10	58452009	58452173	165	*	A_WT_peak_1688	18	3.55307	4.68332	1.84905	61	Intron (rna-XM_030244869.1/gene-Edar, intron 4 of 10)	10	58436602	58465951	29350	2	Edar	rna-XM_030244869.1	13778
chr10	58511384	58511630	247	*	A_WT_peak_1689	21	3.67166	5.08865	2.15324	109	Promoter (<=1kb)	10	58436610	58511518	74909	2	Edar	rna-NM_010100.3	0
chr10	58690356	58690563	208	*	A_WT_peak_1690	15	3.38767	4.22887	1.56051	30	Intron (rna-NM_172788.3/gene-Sh3rf3, intron 1 of 9)	10	58649181	58974738	325558	1	Sh3rf3	rna-NM_172788.3	41175
chr10	58750772	58750989	218	*	A_WT_peak_1691	22	3.89118	5.21689	2.25186	87	Intron (rna-NM_172788.3/gene-Sh3rf3, intron 1 of 9)	10	58742089	58974736	232648	1	Sh3rf3	rna-XM_006513617.4	8683
chr10	59057392	59057830	439	*	A_WT_peak_1692	32	4.08186	6.52186	3.27492	161	Promoter (<=1kb)	10	59057744	59062256	4513	1	Sowahc	rna-NM_172939.3	0
chr10	59058487	59058864	378	*	A_WT_peak_1693	27	3.83439	5.83222	2.71811	25	Exon (rna-NM_172939.3/gene-Sowahc, exon 1 of 1)	10	59057744	59062256	4513	1	Sowahc	rna-NM_172939.3	743
chr10	59158997	59159683	687	*	A_WT_peak_1694	94	6.78292	13.3959	9.4141	28	Promoter (<=1kb)	10	59159019	59209107	50089	1	P4ha1	rna-XR_001779475.3	0
chr10	59200571	59200722	152	*	A_WT_peak_1695	19	3.60357	4.76343	1.90842	145	Intron (rna-XR_001779475.3/gene-P4ha1, intron 9 of 13)	10	59231439	59232579	1141	1	Gm10273	gene-Gm10273	-30717
chr10	59216406	59216693	288	*	A_WT_peak_1696	22	4.07915	5.29532	2.28939	23	Distal Intergenic	10	59231439	59232579	1141	1	Gm10273	gene-Gm10273	-14746
chr10	59452509	59452854	346	*	A_WT_peak_1697	119	7.28222	16.0861	11.9036	32	Promoter (<=1kb)	10	59282806	59452514	169709	2	Mcu	rna-NM_001033259.4	0
chr10	59462089	59462253	165	*	A_WT_peak_1698	39	4.54148	7.31991	3.94991	76	Distal Intergenic	10	59460212	59461138	927	1	Gm51790	gene-Gm51790	1877
chr10	59529727	59529955	229	*	A_WT_peak_1699	20	3.81856	4.8937	2.00626	217	Distal Intergenic	10	59500376	59523056	22681	2	Gm40672	rna-XR_871746.1	-6671
chr10	59538022	59538464	443	*	A_WT_peak_1700	122	7.73824	16.4478	12.2375	203	Promoter (<=1kb)	10	59538385	59699956	161572	1	Micu1	rna-NM_001291442.1	0
chr10	59613282	59613599	318	*	A_WT_peak_1701	30	4.23991	6.25998	3.05725	199	Intron (rna-NM_001291442.1/gene-Micu1, intron 8 of 13)	10	59635024	59636076	1053	2	Gm17059	rna-NR_155871.1	22477
chr10	59620348	59620535	188	*	A_WT_peak_1702	36	4.32035	6.93921	3.62875	114	Intron (rna-NM_001291442.1/gene-Micu1, intron 8 of 13)	10	59635024	59636076	1053	2	Gm17059	rna-NR_155871.1	15541
chr10	59636773	59636928	156	*	A_WT_peak_1703	31	4.16381	6.39734	3.17046	37	Promoter (<=1kb)	10	59635024	59636076	1053	2	Gm17059	rna-NR_155871.1	-697
chr10	59683483	59683720	238	*	A_WT_peak_1704	27	3.97406	5.82196	2.70961	33	Intron (rna-NM_001291442.1/gene-Micu1, intron 12 of 13)	10	59707015	59707519	505	2	Gm7413	gene-Gm7413	23799
chr10	59705767	59706096	330	*	A_WT_peak_1705	29	3.59116	6.10813	2.94292	230	Distal Intergenic	10	59707015	59707519	505	2	Gm7413	gene-Gm7413	1423
chr10	59715300	59715765	466	*	A_WT_peak_1706	42	4.0023	7.72287	4.29931	378	Promoter (<=1kb)	10	59715405	59735118	19714	1	Dnajb12	rna-NM_001374756.1	0
chr10	59765026	59765227	202	*	A_WT_peak_1707	25	3.86304	5.63705	2.56073	94	Distal Intergenic	10	59745269	59758510	13242	1	Gm40673	rna-XR_871747.3	19757
chr10	59771226	59771445	220	*	A_WT_peak_1708	36	4.32035	6.93921	3.62875	120	Distal Intergenic	10	59785497	59787592	2096	2	Ddit4	rna-NM_029083.2	16147
chr10	59787486	59787876	391	*	A_WT_peak_1709	126	5.71017	16.9264	12.6834	196	Promoter (<=1kb)	10	59785497	59787592	2096	2	Ddit4	rna-NM_029083.2	0
chr10	59838631	59839226	596	*	A_WT_peak_1710	63	4.79836	10.0052	6.32355	351	Promoter (<=1kb)	10	59823231	59838957	15727	2	Anapc16	rna-NM_001347451.1	0
chr10	59917433	59917878	446	*	A_WT_peak_1711	32	3.76447	6.45061	3.21494	239	Intron (rna-XM_006514039.4/gene-Ascc1, intron 9 of 10)	10	59942079	59969736	27658	1	Spock2	rna-NM_052994.2	-24201
chr10	60105475	60105652	178	*	A_WT_peak_1712	34	4.03041	6.69595	3.42117	101	Distal Intergenic	10	60113436	60138377	24942	1	Psap	rna-XM_017313848.2	-7784
chr10	60148282	60148472	191	*	A_WT_peak_1713	56	4.5864	9.24199	5.63721	60	Exon (rna-XM_006513602.2/gene-Cdh23, exon 9 of 22)	10	60138527	60141348	2822	2	Cdh23	rna-XM_017313931.3	-6934
chr10	60168714	60168898	185	*	A_WT_peak_1714	26	3.50318	5.70195	2.61327	133	Intron (rna-XM_017313927.2/gene-Cdh23, intron 41 of 68)	10	60138527	60159152	20626	2	Cdh23	rna-XM_017313929.1	-9562
chr10	60182767	60182954	188	*	A_WT_peak_1715	17	3.05044	4.61253	1.79604	114	5' UTR	10	60182630	60208463	25834	1	Vsir	rna-NM_028732.4	137
chr10	60243599	60243873	275	*	A_WT_peak_1716	32	3.53878	6.47312	3.23367	194	Intron (rna-XR_380449.3/gene-Vsir, intron 7 of 8)	10	60238400	60239338	939	1	Gm17455	rna-XM_006512964.5	5199
chr10	60257360	60257675	316	*	A_WT_peak_1717	49	4.33356	8.41512	4.90531	254	Intron (rna-XR_380449.3/gene-Vsir, intron 7 of 8)	10	60238400	60239338	939	1	Gm17455	rna-XM_006512964.5	18960
chr10	60277164	60277366	203	*	A_WT_peak_1718	20	3.15446	5.01398	2.09687	88	Intron (rna-XM_017313927.2/gene-Cdh23, intron 14 of 68)	10	60238400	60239338	939	1	Gm17455	rna-XM_006512964.5	38764
chr10	60355060	60355230	171	*	A_WT_peak_1719	20	3.43552	4.91166	2.02031	73	Intron (rna-XM_017313927.2/gene-Cdh23, intron 9 of 68)	10	60238400	60239338	939	1	Gm17455	rna-XM_006512964.5	116660
chr10	60454833	60454983	151	*	A_WT_peak_1720	29	3.70814	6.0945	2.93159	88	Intron (rna-XM_017313927.2/gene-Cdh23, intron 3 of 68)	10	60138527	60493375	354849	2	Cdh23	rna-XM_017313927.2	38392
chr10	60503860	60504016	157	*	A_WT_peak_1721	39	4.56484	7.35981	3.98467	102	Intron (rna-XM_030245069.1/gene-Cdh23, intron 1 of 68)	10	60138527	60493375	354849	2	Cdh23	rna-XM_017313927.2	-10485
chr10	60520685	60520849	165	*	A_WT_peak_1722	22	3.3562	5.19891	2.23783	125	Intron (rna-XM_030245069.1/gene-Cdh23, intron 1 of 68)	10	60138527	60522749	384223	2	Cdh23	rna-XM_030245069.1	1900
chr10	60530374	60530650	277	*	A_WT_peak_1723	30	3.67577	6.27613	3.07047	73	Intron (rna-XM_017313930.2/gene-Cdh23, intron 1 of 68)	10	60138529	60532269	393741	2	Cdh23	rna-NM_001252635.1	1619
chr10	60559098	60559351	254	*	A_WT_peak_1724	43	4.3292	7.8172	4.38212	167	Intron (rna-NM_023596.3/gene-Slc29a3, intron 4 of 5)	10	60535999	60536143	145	1	LOC115487528	rna-XR_004936587.1	23099
chr10	60575937	60576315	379	*	A_WT_peak_1725	32	3.91425	6.48126	3.24054	210	Intron (rna-NM_023596.3/gene-Slc29a3, intron 2 of 5)	10	60547851	60588561	40711	2	Slc29a3	rna-NM_023596.3	12246
chr10	60603508	60603767	260	*	A_WT_peak_1726	28	3.41095	5.96904	2.82935	54	Intron (rna-NM_001359273.1/gene-Unc5b, intron 14 of 15)	10	60547851	60588624	40774	2	Slc29a3	rna-XM_006514120.4	-14884
chr10	60694676	60694923	248	*	A_WT_peak_1727	18	3.39456	4.63233	1.81087	67	Distal Intergenic	10	60598373	60667360	68988	2	Unc5b	rna-NM_029770.3	-27316
chr10	60705743	60705915	173	*	A_WT_peak_1728	17	3.47514	4.55935	1.75598	5	Distal Intergenic	10	60724386	60726265	1880	1	Gm36750	rna-XR_003948874.1	-18471
chr10	60817845	60818046	202	*	A_WT_peak_1729	31	4.0081	6.39123	3.16573	44	Distal Intergenic	10	60796581	60796603	23	1	rna-NR_130327.1	rna-Mir466j	21264
chr10	60900324	60900624	301	*	A_WT_peak_1730	70	5.1914	10.8108	7.05184	294	Distal Intergenic	10	60925110	60930108	4999	1	Pcbd1	rna-NM_025273.4	-24486
chr10	60935029	60935309	281	*	A_WT_peak_1731	32	4.20632	6.46934	3.23047	180	3' UTR	10	60925110	60930108	4999	1	Pcbd1	rna-NM_025273.4	9919
chr10	60982254	60983785	1532	*	A_WT_peak_1732	96	5.03838	13.6507	9.64941	891	Promoter (<=1kb)	10	60934421	60983463	49043	2	Sgpl1	rna-NM_001316673.1	0
chr10	61002334	61002498	165	*	A_WT_peak_1733	30	3.94572	6.28013	3.07325	160	Distal Intergenic	10	61007743	61016459	8717	1	Tbata	rna-NM_001017441.2	-5245
chr10	61022715	61022912	198	*	A_WT_peak_1734	32	3.79973	6.51953	3.27336	161	Intron (rna-NM_001017419.2/gene-Tbata, intron 8 of 9)	10	61011041	61016459	5419	1	Tbata	rna-NM_023064.3	11674
chr10	61073911	61074104	194	*	A_WT_peak_1735	25	3.55096	5.56281	2.50184	146	Intron (rna-XM_036155775.1/gene-Adamts14, intron 4 of 21)	10	61052928	61056314	3387	1	Gm29861	rna-XR_871759.2	20983
chr10	61103732	61103927	196	*	A_WT_peak_1736	25	3.59411	5.6425	2.56517	30	Intron (rna-XM_036155775.1/gene-Adamts14, intron 2 of 21)	10	61032891	61109198	76308	2	Adamts14	rna-NM_001081127.2	5271
chr10	61130493	61130656	164	*	A_WT_peak_1737	17	3.48469	4.57457	1.76843	76	Promoter (2-3kb)	10	61133530	61140463	6934	1	Prf1	rna-XM_006513370.4	-2874
chr10	61132919	61133149	231	*	A_WT_peak_1738	50	5.12835	8.63109	5.09527	57	Promoter (<=1kb)	10	61133530	61140463	6934	1	Prf1	rna-XM_006513370.4	-381
chr10	61253577	61253771	195	*	A_WT_peak_1739	25	3.55096	5.56281	2.50184	20	Promoter (<=1kb)	10	61253751	61261117	7367	1	Nodal	rna-NM_013611.5	0
chr10	61288593	61288875	283	*	A_WT_peak_1740	222	8.68569	27.16	22.2867	160	Promoter (<=1kb)	10	61268276	61288448	20173	2	Eif4ebp2	rna-NM_010124.2	-145
chr10	61311752	61312284	533	*	A_WT_peak_1741	62	4.93456	9.94971	6.27352	400	Exon (rna-NR_166099.1/gene-D830039M14Rik, exon 1 of 1)	10	61311612	61418021	106410	1	Lrrc20	rna-NM_153542.1	140
chr10	61373744	61373953	210	*	A_WT_peak_1742	30	3.75946	6.19153	3.01122	65	Intron (rna-XM_017313884.1/gene-Lrrc20, intron 2 of 3)	10	61345429	61346454	1026	2	Gm17829	gene-Gm17829	-27290
chr10	61477975	61478150	176	*	A_WT_peak_1743	22	3.65862	5.29303	2.28939	52	Distal Intergenic	10	61484400	61509944	25545	1	Ppa1	rna-NM_026438.4	-6250
chr10	61484181	61484474	294	*	A_WT_peak_1744	76	5.50261	11.4289	7.61359	170	Promoter (<=1kb)	10	61484400	61509944	25545	1	Ppa1	rna-NM_026438.4	0
chr10	61491021	61491208	188	*	A_WT_peak_1745	16	3.23695	4.36895	1.65115	145	Intron (rna-NM_026438.4/gene-Ppa1, intron 2 of 10)	10	61484400	61509944	25545	1	Ppa1	rna-NM_026438.4	6621
chr10	61515612	61516224	613	*	A_WT_peak_1746	184	7.20894	23.0413	18.406	362	Promoter (<=1kb)	10	61510306	61516069	5764	2	1700022H01Rik	rna-NR_126477.1	0
chr10	61531316	61531493	178	*	A_WT_peak_1747	25	3.25632	5.63863	2.56222	59	Promoter (<=1kb)	10	61531365	61538552	7188	1	Tysnd1	rna-NR_073587.1	0
chr10	61604831	61605082	252	*	A_WT_peak_1748	26	3.76432	5.7102	2.61962	170	Intron (rna-XM_006513833.4/gene-Macroh2a2, intron 1 of 9)	10	61610516	61610600	85	1	Mir5108	rna-NR_039568.1	-5434
chr10	61682096	61682253	158	*	A_WT_peak_1749	14	3.07967	4.10298	1.47331	31	Intron (rna-XR_871762.2/gene-Gm40674, intron 1 of 2)	10	61680853	61709910	29058	1	Gm40674	rna-XR_871762.2	1243
chr10	61708431	61708756	326	*	A_WT_peak_1750	30	3.77439	6.21965	3.0232	141	Intron (rna-XR_871762.2/gene-Gm40674, intron 2 of 2)	10	61692652	61709910	17259	1	Gm40674	rna-XR_871763.2	15779
chr10	61798893	61799048	156	*	A_WT_peak_1751	30	3.96335	6.31158	3.09948	86	Intron (rna-NM_001304757.1/gene-Col13a1, intron 1 of 37)	10	61795384	61796242	859	1	Gm5750	gene-Gm5750	3509
chr10	61879449	61879655	207	*	A_WT_peak_1752	22	3.46365	5.17851	2.2224	20	Distal Intergenic	10	61906801	61908350	1550	1	Gm5424	rna-NR_002687.1	-27146
chr10	61885417	61885648	232	*	A_WT_peak_1753	35	4.28903	6.88482	3.58282	11	Distal Intergenic	10	61906801	61908350	1550	1	Gm5424	rna-NR_002687.1	-21153
chr10	62043705	62044167	463	*	A_WT_peak_1754	61	5.22407	9.81816	6.15533	260	Intron (rna-NM_197996.2/gene-Tspan15, intron 1 of 7)	10	62023134	62031634	8501	2	Tspan15	rna-XM_011243561.3	-12071
chr10	62059922	62060198	277	*	A_WT_peak_1755	18	3.16435	4.6346	1.81241	102	Intron (rna-NM_197996.2/gene-Tspan15, intron 1 of 7)	10	62023134	62066887	43754	2	Tspan15	rna-XM_006514080.1	6689
chr10	62097549	62097708	160	*	A_WT_peak_1756	24	3.2672	5.45006	2.41184	26	Intron (rna-NM_009314.4/gene-Tacr2, intron 4 of 4)	10	62088217	62101769	13553	1	Tacr2	rna-NM_009314.4	9332
chr10	62129819	62130078	260	*	A_WT_peak_1757	37	4.22756	7.05532	3.72747	100	Intron (rna-NM_001146100.1/gene-Hk1, intron 7 of 17)	10	62104880	62163560	58681	2	Hk1	rna-XM_006513247.2	33482
chr10	62142435	62142689	255	*	A_WT_peak_1758	17	3.26586	4.61705	1.79975	196	Intron (rna-NM_001146100.1/gene-Hk1, intron 2 of 17)	10	62104880	62163560	58681	2	Hk1	rna-XM_006513247.2	20871
chr10	62155650	62155901	252	*	A_WT_peak_1759	31	3.74362	6.40975	3.18083	121	Intron (rna-NM_001146100.1/gene-Hk1, intron 1 of 17)	10	62104880	62163560	58681	2	Hk1	rna-XM_006513247.2	7659
chr10	62176009	62176324	316	*	A_WT_peak_1760	54	4.45738	8.97349	5.40018	169	Promoter (<=1kb)	10	62104634	62176200	71567	2	Hk1	rna-NM_001146100.1	0
chr10	62235500	62235653	154	*	A_WT_peak_1761	18	3.17044	4.64582	1.82144	146	Intron (rna-NM_145419.1/gene-Hkdc1, intron 10 of 17)	10	62218922	62244493	25572	2	Hkdc1	rna-XM_011243398.4	8840
chr10	62240957	62241108	152	*	A_WT_peak_1762	41	4.35449	7.57301	4.16962	28	Intron (rna-NM_145419.1/gene-Hkdc1, intron 7 of 17)	10	62218922	62244493	25572	2	Hkdc1	rna-XM_011243398.4	3385
chr10	62285567	62285813	247	*	A_WT_peak_1763	36	3.77909	6.98629	3.6696	184	Promoter (<=1kb)	10	62265000	62285517	20518	2	Supv3l1	rna-NM_181423.3	-50
chr10	62294997	62295213	217	*	A_WT_peak_1764	29	3.84318	6.09624	2.93268	4	Intron (rna-NM_001113355.1/gene-Vps26a, intron 7 of 8)	10	62265108	62287294	22187	2	Supv3l1	rna-XR_003948720.1	-7703
chr10	62322256	62322845	590	*	A_WT_peak_1765	232	8.24132	28.2201	23.2839	404	Promoter (<=1kb)	10	62290622	62322377	31756	2	Vps26a	rna-NM_001113355.1	0
chr10	62371801	62372139	339	*	A_WT_peak_1766	43	4.48943	7.82136	4.38582	117	Distal Intergenic	10	62329612	62363224	33613	2	Srgn	rna-NM_001358965.1	-8577
chr10	62385679	62386108	430	*	A_WT_peak_1767	130	6.74795	17.3006	13.0294	52	Distal Intergenic	10	62329612	62363224	33613	2	Srgn	rna-NM_001358965.1	-22455
chr10	62413883	62414397	515	*	A_WT_peak_1768	96	5.49569	13.6738	9.67013	398	Promoter (<=1kb)	10	62394249	62414236	19988	2	Kifbp	rna-NM_028197.2	0
chr10	62420217	62420481	265	*	A_WT_peak_1769	54	4.49691	9.05614	5.47355	85	Exon (rna-XM_030245181.1/gene-Ddx21, exon 12 of 14)	10	62397067	62414846	17780	2	Kifbp	rna-XM_006514192.5	-5371
chr10	62430793	62431015	223	*	A_WT_peak_1770	18	3.41117	4.65991	1.83154	116	5' UTR	10	62416026	62438071	22046	2	Ddx21	rna-XM_030245181.1	7056
chr10	62437870	62438195	326	*	A_WT_peak_1771	57	4.95196	9.31255	5.70077	220	Promoter (<=1kb)	10	62416026	62438071	22046	2	Ddx21	rna-XM_030245181.1	0
chr10	62486649	62487491	843	*	A_WT_peak_1772	270	8.53297	32.22	27.0676	399	Promoter (<=1kb)	10	62451571	62486997	35427	2	Ddx50	rna-NM_001358819.1	0
chr10	62497994	62498495	502	*	A_WT_peak_1773	67	5.1976	10.4696	6.74308	133	Intron (rna-NM_001033260.2/gene-Stox1, intron 3 of 3)	10	62494178	62494303	126	2	Gm51417	gene-Gm51417	-3691
chr10	62513493	62513696	204	*	A_WT_peak_1774	14	3.16297	4.05778	1.442	37	Intron (rna-NM_001033260.2/gene-Stox1, intron 1 of 3)	10	62518287	62518337	51	1	Mir7215	rna-NR_106074.1	-4591
chr10	62572277	62572648	372	*	A_WT_peak_1775	54	5.54988	8.9994	5.42321	102	Distal Intergenic	10	62494822	62561907	67086	2	Stox1	rna-XM_006513474.2	-10370
chr10	62596563	62596850	288	*	A_WT_peak_1776	22	3.92735	5.27364	2.28939	112	Intron (rna-XM_006513995.4/gene-Ccar1, intron 15 of 24)	10	62601358	62601385	28	2	Snord98	rna-NR_028557.1	4535
chr10	62627625	62628424	800	*	A_WT_peak_1777	84	5.3963	12.3258	8.43148	626	Promoter (<=1kb)	10	62579707	62628040	48334	2	Ccar1	rna-XM_006513995.4	0
chr10	62701213	62701472	260	*	A_WT_peak_1778	24	3.64766	5.50553	2.4572	213	Promoter (<=1kb)	10	62701229	62746426	45198	1	Gm51805	rna-XR_003949007.2	0
chr10	62701644	62701820	177	*	A_WT_peak_1779	19	3.37454	4.80626	1.94092	11	5' UTR	10	62701229	62746426	45198	1	Gm51805	rna-XR_003949007.2	415
chr10	62723101	62723297	197	*	A_WT_peak_1780	36	4.3309	6.9575	3.64441	86	Promoter (<=1kb)	10	62640349	62723103	82755	2	Tet1	rna-NM_001253857.2	0
chr10	62756149	62756481	333	*	A_WT_peak_1781	28	4.05889	5.96243	2.82382	191	Promoter (<=1kb)	10	62756396	62782215	25820	1	Slc25a16	rna-XM_030245305.2	0
chr10	62815770	62815952	183	*	A_WT_peak_1782	26	3.75574	5.69521	2.60783	31	Promoter (<=1kb)	10	62815947	62847264	31318	1	Rufy2	rna-XR_003948799.2	0
chr10	62859222	62859962	741	*	A_WT_peak_1783	243	8.89522	29.3094	24.3121	506	Promoter (<=1kb)	10	62850443	62859628	9186	2	Hnrnph3	rna-NM_001079824.1	0
chr10	62980186	62980362	177	*	A_WT_peak_1784	23	3.86504	5.40276	2.37425	23	Intron (rna-NM_182992.2/gene-Mypn, intron 10 of 19)	10	62935564	62937059	1496	1	Atoh7	rna-NM_016864.3	44622
chr10	62993101	62993515	415	*	A_WT_peak_1785	74	5.61179	11.2653	7.46548	122	Intron (rna-NM_182992.2/gene-Mypn, intron 6 of 19)	10	62951574	63039731	88158	2	Mypn	rna-NM_182992.2	46216
chr10	63015541	63015692	152	*	A_WT_peak_1786	13	3.29502	3.91446	1.34341	3	Intron (rna-NM_182992.2/gene-Mypn, intron 2 of 19)	10	62951574	63039731	88158	2	Mypn	rna-NM_182992.2	24039
chr10	63079433	63080116	684	*	A_WT_peak_1787	103	6.64477	14.4376	10.3754	202	Promoter (<=1kb)	10	63078010	63079932	1923	2	1700120B22Rik	rna-NR_166111.1	0
chr10	63174770	63175273	504	*	A_WT_peak_1788	110	6.36537	15.1736	11.0562	139	Promoter (<=1kb)	10	63154784	63174814	20031	2	Sirt1	rna-NM_001159589.2	0
chr10	63183347	63183571	225	*	A_WT_peak_1789	28	4.2672	6.04732	2.89303	168	Distal Intergenic	10	63154784	63174814	20031	2	Sirt1	rna-NM_019812.3	-8533
chr10	63265364	63265866	503	*	A_WT_peak_1790	41	4.04722	7.54257	4.14325	34	Promoter (<=1kb)	10	63265877	64839446	1573570	1	Ctnna3	rna-NM_177612.3	-11
chr10	63370173	63370587	415	*	A_WT_peak_1791	86	6.81583	12.6084	8.69114	161	Intron (rna-NM_177612.3/gene-Ctnna3, intron 2 of 17)	10	63316096	64841174	1525079	1	Ctnna3	rna-XM_006513475.4	54077
chr10	63409716	63410127	412	*	A_WT_peak_1792	30	4.06119	6.22271	3.02539	284	Intron (rna-NM_177612.3/gene-Ctnna3, intron 4 of 17)	10	63316096	64841174	1525079	1	Ctnna3	rna-XM_006513475.4	93620
chr10	63895576	63895740	165	*	A_WT_peak_1793	44	5.28604	7.94148	4.49122	90	Intron (rna-NM_177612.3/gene-Ctnna3, intron 7 of 17)	10	63764276	63926034	161759	2	Lrrtm3	rna-NM_178678.4	30294
chr10	64548696	64549034	339	*	A_WT_peak_1794	44	5.28604	7.94148	4.49122	12	Intron (rna-NM_177612.3/gene-Ctnna3, intron 13 of 17)	10	64888484	64888591	108	2	Gm51834	gene-Gm51834	339557
chr10	66739960	66740133	174	*	A_WT_peak_1795	27	4.17771	5.90471	2.7771	120	Intron (rna-XR_004936403.1/gene-Gm31416, intron 1 of 6)	10	66666301	66747302	81002	2	Gm31416	rna-XR_004936401.1	7169
chr10	66831438	66831634	197	*	A_WT_peak_1796	19	3.64502	4.82906	1.95847	29	Distal Intergenic	10	66840854	66877105	36252	1	Gm31763	rna-NR_110511.1	-9220
chr10	67016197	67016392	196	*	A_WT_peak_1797	33	4.6361	6.6318	3.36802	1	5' UTR	10	67021529	67092105	70577	1	Jmjd1c	rna-NM_001242396.1	-5137
chr10	67069760	67070137	378	*	A_WT_peak_1798	26	4.09189	5.76756	2.66575	257	Intron (rna-XM_030244805.2/gene-Jmjd1c, intron 12 of 24)	10	67071640	67071740	101	2	Gm26359	gene-Gm26359	1603
chr10	67383792	67383983	192	*	A_WT_peak_1799	39	4.37342	7.31741	3.9481	46	3' UTR	10	67380341	67384785	4445	2	Ado	rna-NM_001005419.2	802
chr10	67384923	67385147	225	*	A_WT_peak_1800	85	6.01215	12.4082	8.50674	62	Promoter (<=1kb)	10	67380341	67384785	4445	2	Ado	rna-NM_001005419.2	-138
chr10	67484841	67485012	172	*	A_WT_peak_1801	14	3.44034	4.13449	1.49568	31	Distal Intergenic	10	67500459	67503268	2810	1	Gm32515	rna-XR_380530.2	-15447
chr10	67539946	67540144	199	*	A_WT_peak_1802	29	4.15877	6.12695	2.95839	127	Promoter (<=1kb)	10	67541060	67546436	5377	1	Gm40680	rna-XR_871796.2	-916
chr10	67683760	67683946	187	*	A_WT_peak_1803	18	3.69489	4.70322	1.86312	174	Distal Intergenic	10	67628560	67629088	529	2	Gm29774	gene-Gm29774	-54672
chr10	67759930	67760080	151	*	A_WT_peak_1804	30	4.53239	6.21905	3.02288	139	Distal Intergenic	10	67721935	67748492	26558	2	Zfp365	rna-NM_178679.2	-11438
chr10	67815245	67815724	480	*	A_WT_peak_1805	117	6.93795	15.8872	11.7182	159	Promoter (<=1kb)	10	67815371	67893252	77882	1	Rtkn2	rna-XR_004936111.1	0
chr10	67844404	67844573	170	*	A_WT_peak_1806	13	3.32745	3.96355	1.37659	2	Intron (rna-XR_004936111.1/gene-Rtkn2, intron 6 of 12)	10	67841545	67884315	42771	1	Rtkn2	rna-XM_006513292.5	2859
chr10	67860928	67861144	217	*	A_WT_peak_1807	22	3.90317	5.2357	2.26505	35	Intron (rna-XR_004936111.1/gene-Rtkn2, intron 7 of 12)	10	67841545	67884315	42771	1	Rtkn2	rna-XM_006513292.5	19383
chr10	68118855	68119132	278	*	A_WT_peak_1808	60	5.5299	9.65625	6.00979	71	Distal Intergenic	10	67928353	68114596	186244	2	Arid5b	rna-XM_030245282.2	-4259
chr10	68284570	68284735	166	*	A_WT_peak_1809	41	5.00761	7.49791	4.10479	109	Intron (rna-NM_028491.1/gene-Cabcoco1, intron 5 of 7)	10	68251512	68275619	24108	1	Gm40683	rna-XR_871803.1	33058
chr10	68531173	68531630	458	*	A_WT_peak_1810	38	4.65816	7.22355	3.8658	179	Distal Intergenic	10	68559576	68618484	58909	1	Tmem26	rna-NM_177794.3	-27946
chr10	68531909	68532095	187	*	A_WT_peak_1811	38	4.65816	7.22355	3.8658	111	Distal Intergenic	10	68559576	68618484	58909	1	Tmem26	rna-NM_177794.3	-27481
chr10	68533981	68534228	248	*	A_WT_peak_1812	15	3.34791	4.16725	1.51795	176	Distal Intergenic	10	68559576	68618484	58909	1	Tmem26	rna-NM_177794.3	-25348
chr10	68559423	68559640	218	*	A_WT_peak_1813	22	4.07915	5.29532	2.28939	151	Promoter (<=1kb)	10	68559576	68618484	58909	1	Tmem26	rna-NM_177794.3	0
chr10	68911528	68911750	223	*	A_WT_peak_1814	30	4.53239	6.21905	3.02288	214	Intron (rna-XR_380544.1/gene-Gm33130, intron 2 of 2)	10	68908178	68921659	13482	2	Gm33130	rna-XR_380544.1	9909
chr10	68980733	68980900	168	*	A_WT_peak_1815	30	4.53239	6.21905	3.02288	17	Distal Intergenic	10	68983575	68986869	3295	2	Gm33263	rna-XR_380546.4	5969
chr10	69022486	69022744	259	*	A_WT_peak_1816	19	3.73114	4.75906	1.90534	7	Intron (rna-XM_006514049.5/gene-Rhobtb1, intron 2 of 11)	10	69044382	69127621	83240	1	Rhobtb1	rna-NM_001252636.1	-21638
chr10	69029837	69029991	155	*	A_WT_peak_1817	22	4.07915	5.29532	2.28939	14	Intron (rna-XM_006514049.5/gene-Rhobtb1, intron 2 of 11)	10	69044382	69127621	83240	1	Rhobtb1	rna-NM_001252636.1	-14391
chr10	69048546	69048705	160	*	A_WT_peak_1818	18	3.56305	4.69917	1.86114	127	5' UTR	10	69048487	69127621	79135	1	Rhobtb1	rna-NM_001081347.1	59
chr10	69106863	69107021	159	*	A_WT_peak_1819	26	4.06801	5.72933	2.63505	58	Intron (rna-XM_006514049.5/gene-Rhobtb1, intron 7 of 11)	10	69103317	69127431	24115	1	Rhobtb1	rna-XM_036155983.1	3546
chr10	69188348	69188906	559	*	A_WT_peak_1820	94	5.7434	13.4519	9.46607	318	Promoter (<=1kb)	10	69170976	69188742	17767	2	Cdk1	rna-NM_007659.4	0
chr10	69202228	69202408	181	*	A_WT_peak_1821	16	3.40056	4.44028	1.66807	128	Distal Intergenic	10	69170976	69188742	17767	2	Cdk1	rna-NM_007659.4	-13486
chr10	69253527	69253972	446	*	A_WT_peak_1822	108	7.39922	14.917	10.817	105	Intron (rna-XM_036155538.1/gene-Ank3, intron 1 of 43)	10	69234608	69863106	628499	1	Ank3	rna-XM_036155557.1	18919
chr10	69288986	69289140	155	*	A_WT_peak_1823	19	3.7806	4.83523	1.96205	71	Intron (rna-XM_036155538.1/gene-Ank3, intron 1 of 43)	10	69234608	69863106	628499	1	Ank3	rna-XM_036155557.1	54378
chr10	69297676	69297882	207	*	A_WT_peak_1824	16	3.61189	4.39482	1.65115	157	Intron (rna-XM_036155538.1/gene-Ank3, intron 1 of 43)	10	69234608	69863106	628499	1	Ank3	rna-XM_036155557.1	63068
chr10	69641982	69642182	201	*	A_WT_peak_1825	22	4.07915	5.29532	2.28939	19	Intron (rna-XM_036155538.1/gene-Ank3, intron 2 of 43)	10	69698515	69702378	3864	2	Gm33416	rna-XR_380549.5	60196
chr10	69700927	69701091	165	*	A_WT_peak_1826	38	4.84801	7.24284	3.88288	109	Intron (rna-XM_036155538.1/gene-Ank3, intron 9 of 43)	10	69698515	69702378	3864	2	Gm33416	rna-XR_380549.5	1287
chr10	69773098	69773252	155	*	A_WT_peak_1827	19	3.61384	4.77971	1.92069	148	Intron (rna-XM_036155538.1/gene-Ank3, intron 25 of 43)	10	69761362	69863266	101905	1	Ank3	rna-NM_170687.3	11736
chr10	69799549	69799879	331	*	A_WT_peak_1828	64	5.60065	10.1364	6.44189	150	Intron (rna-XM_036155538.1/gene-Ank3, intron 29 of 43)	10	69761362	69863266	101905	1	Ank3	rna-NM_170687.3	38187
chr10	69933649	69934000	352	*	A_WT_peak_1829	65	4.76896	10.2728	6.56523	309	Intron (rna-XM_006514276.4/gene-Ccdc6, intron 1 of 8)	10	69932951	70029030	96080	1	Ccdc6	rna-NM_001111121.1	698
chr10	69961589	69961851	263	*	A_WT_peak_1830	20	3.8443	4.93333	2.03576	169	Intron (rna-XM_006514276.4/gene-Ccdc6, intron 1 of 8)	10	69946073	70029030	82958	1	Ccdc6	rna-XM_006514277.4	15516
chr10	69991600	69991812	213	*	A_WT_peak_1831	19	3.47061	4.75836	1.90534	16	Intron (rna-XM_006514276.4/gene-Ccdc6, intron 3 of 8)	10	69946073	70029030	82958	1	Ccdc6	rna-XM_006514277.4	45527
chr10	70058843	70059021	179	*	A_WT_peak_1832	41	4.86442	7.56223	4.1604	67	Distal Intergenic	10	70051591	70055541	3951	1	Mrln	rna-XM_017314076.2	7252
chr10	70367370	70367528	159	*	A_WT_peak_1833	22	3.87928	5.19819	2.23738	110	Intron (rna-XM_017314101.3/gene-Fam13c, intron 7 of 14)	10	70338421	70341079	2659	2	Gm29783	gene-Gm29783	-26291
chr10	70434054	70434445	392	*	A_WT_peak_1834	28	3.77773	5.978	2.83642	40	Intron (rna-NM_178621.4/gene-Phyhipl, intron 1 of 4)	10	70393516	70435121	41606	2	Phyhipl	rna-NM_178621.4	676
chr10	70434618	70434791	174	*	A_WT_peak_1835	41	4.37327	7.60774	4.1995	102	Intron (rna-NM_178621.4/gene-Phyhipl, intron 1 of 4)	10	70393516	70435121	41606	2	Phyhipl	rna-NM_178621.4	330
chr10	70435244	70435529	286	*	A_WT_peak_1836	107	6.60261	14.7904	10.701	65	Promoter (<=1kb)	10	70393516	70435121	41606	2	Phyhipl	rna-NM_178621.4	-123
chr10	70558730	70558970	241	*	A_WT_peak_1837	22	4.06338	5.27097	2.28939	2	Intron (rna-XR_380559.4/gene-Gm33979, intron 2 of 2)	10	70574572	70576062	1491	2	Gm33979	rna-XR_871816.3	17092
chr10	70669084	70669238	155	*	A_WT_peak_1838	31	4.44401	6.32801	3.11289	8	Intron (rna-XR_871817.1/gene-Gm40689, intron 1 of 2)	10	70666615	70678772	12158	1	Gm40689	rna-XR_871817.1	2469
chr10	71073816	71074130	315	*	A_WT_peak_1839	134	7.41185	17.746	13.446	173	Promoter (<=1kb)	10	71061307	71073874	12568	2	Tfam	rna-NM_009360.4	0
chr10	71183244	71183722	479	*	A_WT_peak_1840	125	6.29848	16.7358	12.5048	273	Promoter (<=1kb)	10	71183574	71213681	30108	1	Ipmk	rna-XM_011243555.2	0
chr10	72219883	72220074	192	*	A_WT_peak_1841	16	3.62591	4.41615	1.65115	19	Distal Intergenic	10	72145031	72147868	2838	1	Gm9923	gene-Gm9923	74852
chr10	72490561	72490925	365	*	A_WT_peak_1842	47	5.11774	8.28898	4.7938	110	Promoter (<=1kb)	10	72490678	72505625	14948	1	Zwint	rna-NM_001293684.1	0
chr10	72851258	72851428	171	*	A_WT_peak_1843	37	4.94872	7.12506	3.78722	86	Intron (rna-NR_040646.1/gene-A330049N07Rik, intron 2 of 4)	10	72775766	72808997	33232	2	Gm34776	rna-XR_001779813.3	-42261
chr10	74284330	74284671	342	*	A_WT_peak_1844	24	4.09218	5.5317	2.47733	100	Intron (rna-XR_004936069.1/gene-Pcdh15, intron 22 of 40)	10	73963376	73973049	9674	2	Gm40691	rna-XR_871828.2	-311281
chr10	74774793	74775008	216	*	A_WT_peak_1845	19	3.23263	4.76008	1.90585	176	Distal Intergenic	10	74803009	74852739	49731	1	Gnaz	rna-NM_010311.4	-28001
chr10	74802948	74803157	210	*	A_WT_peak_1846	63	4.65746	10.0306	6.34646	94	Promoter (<=1kb)	10	74803009	74852739	49731	1	Gnaz	rna-NM_010311.4	0
chr10	74872899	74873070	172	*	A_WT_peak_1847	27	3.73009	5.8915	2.76615	80	Promoter (<=1kb)	10	74873058	74890580	17523	1	Rab36	rna-NM_001359272.1	0
chr10	74925288	74925484	197	*	A_WT_peak_1848	33	4.47702	6.64583	3.37974	40	Intron (rna-XM_006513060.5/gene-Bcr, intron 1 of 16)	10	74896728	75020755	124028	1	Bcr	rna-NM_001081412.2	28560
chr10	74979171	74979361	191	*	A_WT_peak_1849	28	3.67233	6.02651	2.87571	65	Intron (rna-XM_006513060.5/gene-Bcr, intron 7 of 16)	10	74966471	75020274	53804	1	Bcr	rna-XM_006513061.5	12700
chr10	75036652	75037092	441	*	A_WT_peak_1850	43	4.98207	7.75417	4.32666	379	Distal Intergenic	10	75047872	75148227	100356	1	Specc1l	rna-XM_017314127.2	-10780
chr10	75047707	75048237	531	*	A_WT_peak_1851	103	6.42143	14.435	10.3734	144	Promoter (<=1kb)	10	75047872	75148227	100356	1	Specc1l	rna-XM_017314127.2	0
chr10	75169745	75169973	229	*	A_WT_peak_1852	49	4.87817	8.52208	4.99899	201	3' UTR	10	75160763	75170618	9856	1	Adora2a	rna-XM_036155515.1	8982
chr10	75352758	75353841	1084	*	A_WT_peak_1853	132	5.62845	17.4911	13.207	451	Promoter (<=1kb)	10	75342648	75353163	10516	2	Gucd1	rna-XM_030245248.2	0
chr10	75462810	75463006	197	*	A_WT_peak_1854	28	4.11378	6.05295	2.8975	147	Exon (gene-Gm19688/gene-Gm19688, exon 1 of 2)	10	75454914	75463742	8829	2	Gm19688	gene-Gm19688	736
chr10	75503945	75504242	298	*	A_WT_peak_1855	13	2.64537	3.95864	1.37418	8	Intron (rna-NM_172549.3/gene-Cabin1, intron 29 of 36)	10	75472453	75479842	7390	2	Susd2	rna-NM_027890.5	-24103
chr10	75531441	75531666	226	*	A_WT_peak_1856	28	3.51036	5.94624	2.81029	199	Promoter (1-2kb)	10	75532972	75545097	12126	1	Gm40696	rna-XR_003949010.1	-1306
chr10	75600053	75600290	238	*	A_WT_peak_1857	113	6.32904	15.5232	11.3787	74	Promoter (<=1kb)	10	75481944	75600191	118248	2	Cabin1	rna-NM_172549.3	0
chr10	75608360	75608691	332	*	A_WT_peak_1858	37	3.92686	7.02952	3.70626	165	Exon (rna-NM_010027.1/gene-Ddt, exon 2 of 3)	10	75607067	75609208	2142	2	Ddt	rna-NM_010027.1	517
chr10	75608968	75609303	336	*	A_WT_peak_1859	42	4.08344	7.61647	4.20687	58	Promoter (<=1kb)	10	75607067	75609208	2142	2	Ddt	rna-NM_010027.1	0
chr10	75616638	75616905	268	*	A_WT_peak_1860	25	3.7387	5.66542	2.58386	103	5' UTR	10	75609956	75617248	7293	2	Gstt3	rna-NM_133994.3	343
chr10	75673232	75673386	155	*	A_WT_peak_1861	34	3.93234	6.7765	3.48991	114	Promoter (<=1kb)	10	75667676	75673253	5578	2	Gstt2	rna-XM_006513240.1	0
chr10	75695691	75696139	449	*	A_WT_peak_1862	85	5.44459	12.4294	8.52623	399	Promoter (<=1kb)	10	75695187	75696111	925	2	Mif	rna-NM_010798.3	0
chr10	75729040	75729391	352	*	A_WT_peak_1863	100	4.81496	14.0743	10.0392	181	Promoter (<=1kb)	10	75729232	75731775	2544	1	Derl3	rna-NM_001358983.1	0
chr10	75775205	75775432	228	*	A_WT_peak_1864	16	2.88631	4.46604	1.68827	69	3' UTR	10	75773553	75776376	2824	2	Gm867	rna-XM_017314017.3	944
chr10	75814320	75814486	167	*	A_WT_peak_1865	26	3.92281	5.73677	2.64161	102	Intron (rna-XR_380409.4/gene-Gm5134, intron 7 of 11)	10	75789684	75790393	710	2	Gm40698	rna-XR_871837.3	-23927
chr10	75820456	75820762	307	*	A_WT_peak_1866	69	5.90774	10.6678	6.92214	110	Intron (rna-XR_380409.4/gene-Gm5134, intron 7 of 11)	10	75844760	75844851	92	1	Mir6409	rna-NR_105836.1	-23998
chr10	75842956	75843259	304	*	A_WT_peak_1867	18	3.30849	4.69146	1.85452	213	Promoter (1-2kb)	10	75844760	75844851	92	1	Mir6409	rna-NR_105836.1	-1501
chr10	75868118	75868596	479	*	A_WT_peak_1868	73	5.55036	11.1489	7.35938	338	Promoter (<=1kb)	10	75868235	75878804	10570	1	Zfp280b	rna-XM_006513942.2	0
chr10	75879983	75880227	245	*	A_WT_peak_1869	39	4.36338	7.29948	3.93243	103	Distal Intergenic	10	75868446	75878803	10358	1	Zfp280b	rna-NM_177475.3	11537
chr10	75953815	75953997	183	*	A_WT_peak_1870	33	4.11976	6.5887	3.33116	72	Distal Intergenic	10	75894455	75946852	52398	2	Slc5a4b	rna-NM_023219.2	-6963
chr10	76049728	76049910	183	*	A_WT_peak_1871	24	3.77672	5.49236	2.44581	121	Intron (rna-NM_001077638.2/gene-Prmt2, intron 7 of 10)	10	76043160	76043243	84	2	Mir678	rna-NR_030443.1	-6485
chr10	76073606	76073961	356	*	A_WT_peak_1872	54	5.00257	9.07282	5.48863	145	Promoter (<=1kb)	10	76043060	76073699	30640	2	Prmt2	rna-NM_001077638.2	0
chr10	76109960	76110180	221	*	A_WT_peak_1873	14	2.82769	4.00294	1.40467	158	Exon (rna-XM_006513940.5/gene-Dip2a, exon 29 of 38)	10	76089670	76097153	7484	1	S100b	rna-NM_009115.3	20290
chr10	76126834	76127190	357	*	A_WT_peak_1874	31	3.85865	6.37767	3.15412	34	Exon (rna-XM_006513940.5/gene-Dip2a, exon 17 of 38)	10	76089670	76097153	7484	1	S100b	rna-NM_009115.3	37164
chr10	76153646	76154026	381	*	A_WT_peak_1875	41	4.51893	7.57594	4.17222	66	Exon (rna-XM_006513940.5/gene-Dip2a, exon 4 of 38)	10	76098883	76181125	82243	2	Dip2a	rna-NM_001081419.2	27099
chr10	76165734	76166042	309	*	A_WT_peak_1876	34	4.18781	6.7082	3.43197	301	Intron (rna-XM_006513940.5/gene-Dip2a, intron 1 of 37)	10	76098883	76181125	82243	2	Dip2a	rna-NM_001081419.2	15083
chr10	76198659	76198829	171	*	A_WT_peak_1877	33	4.15837	6.65658	3.38844	166	Intron (rna-NM_001282992.1/gene-Pcnt, intron 36 of 41)	10	76121356	76181194	59839	2	Dip2a	rna-XM_030245208.2	-17465
chr10	76264147	76264769	623	*	A_WT_peak_1878	50	4.59309	8.62824	5.09281	298	Intron (rna-NM_001282992.1/gene-Pcnt, intron 8 of 41)	10	76187098	76253383	66286	2	Pcnt	rna-XM_017313845.3	-10764
chr10	76278121	76279076	956	*	A_WT_peak_1879	96	5.18654	13.6725	9.66901	72	Promoter (<=1kb)	10	76187088	76278746	91659	2	Pcnt	rna-NM_001282992.1	0
chr10	76283260	76283485	226	*	A_WT_peak_1880	55	4.01475	9.12993	5.53938	86	Promoter (1-2kb)	10	76284883	76294273	9391	1	2610028H24Rik	rna-XM_006514295.4	-1398
chr10	76304483	76304674	192	*	A_WT_peak_1881	19	3.14227	4.79066	1.92948	113	Promoter (<=1kb)	10	76304736	76351693	46958	1	Mcm3ap	rna-NM_019434.3	-62
chr10	76366941	76367497	557	*	A_WT_peak_1882	135	6.24559	17.8907	13.5815	271	Promoter (<=1kb)	10	76367303	76392973	25671	1	Lss	rna-XR_004936110.1	0
chr10	76376132	76376296	165	*	A_WT_peak_1883	17	2.98377	4.48205	1.70036	152	Exon (rna-XR_004936110.1/gene-Lss, exon 8 of 22)	10	76367443	76392973	25531	1	Lss	rna-XM_030244922.2	8689
chr10	76403123	76403512	390	*	A_WT_peak_1884	57	5.00628	9.41436	5.79251	382	Intron (rna-XM_017314142.3/gene-Spatc1l, intron 4 of 5)	10	76400599	76406366	5768	2	Gm15343	rna-NR_152752.1	2854
chr10	76423372	76423555	184	*	A_WT_peak_1885	32	3.94675	6.54155	3.29132	76	Intron (rna-NM_080845.2/gene-Ftcd, intron 12 of 13)	10	76412181	76425395	13215	1	Ftcd	rna-XM_006513215.3	11191
chr10	76443531	76443797	267	*	A_WT_peak_1886	29	3.39654	6.16239	2.98799	142	Exon (rna-NM_146007.2/gene-Col6a2, exon 17 of 28)	10	76431590	76459238	27649	2	Col6a2	rna-NM_146007.2	15441
chr10	76444094	76444282	189	*	A_WT_peak_1887	30	3.42201	6.21843	3.02288	162	Intron (rna-NM_146007.2/gene-Col6a2, intron 15 of 27)	10	76431590	76459238	27649	2	Col6a2	rna-NM_146007.2	14956
chr10	76453412	76453563	152	*	A_WT_peak_1888	48	4.7748	8.33776	4.83606	59	Intron (rna-NM_146007.2/gene-Col6a2, intron 1 of 27)	10	76431590	76459238	27649	2	Col6a2	rna-NM_146007.2	5675
chr10	76459006	76459237	232	*	A_WT_peak_1889	52	4.83423	8.76537	5.21451	198	5' UTR	10	76431590	76459238	27649	2	Col6a2	rna-NM_146007.2	1
chr10	76560926	76561115	190	*	A_WT_peak_1890	16	2.8867	4.29033	1.60468	151	Intron (rna-NM_009933.4/gene-Col6a1, intron 1 of 34)	10	76544626	76561878	17253	2	Col6a1	rna-NM_009933.4	763
chr10	76634561	76634722	162	*	A_WT_peak_1891	24	3.54387	5.54969	2.49166	45	Intron (rna-NR_152850.1/gene-Pcbp3, intron 3 of 11)	10	76597688	76652575	54888	2	Pcbp3	rna-NR_152850.1	17853
chr10	76655145	76655316	172	*	A_WT_peak_1892	35	4.29942	6.90287	3.59809	33	Promoter (2-3kb)	10	76597688	76652575	54888	2	Pcbp3	rna-NR_152850.1	-2570
chr10	76797471	76798090	620	*	A_WT_peak_1893	145	6.16865	18.9688	14.5849	327	Promoter (<=1kb)	10	76797975	76798436	462	1	Gm35664	rna-XR_380584.1	0
chr10	76806221	76806380	160	*	A_WT_peak_1894	14	3.1551	4.04502	1.43387	0	Intron (rna-NR_168652.1/gene-Gm35721, intron 3 of 4)	10	76797975	76798436	462	1	Gm35664	rna-XR_380584.1	8246
chr10	76822532	76822720	189	*	A_WT_peak_1895	23	3.87578	5.42012	2.38848	43	Intron (rna-NR_168652.1/gene-Gm35721, intron 3 of 4)	10	76800926	76844457	43532	2	Gm35721	rna-NR_168652.1	21737
chr10	76829753	76830022	270	*	A_WT_peak_1896	28	4.10268	6.03467	2.8829	74	Intron (rna-NR_168652.1/gene-Gm35721, intron 1 of 4)	10	76800926	76844457	43532	2	Gm35721	rna-NR_168652.1	14435
chr10	76862181	76862408	228	*	A_WT_peak_1897	29	3.87676	6.15664	2.98265	70	Intron (rna-NR_152191.1/gene-Gm3137, intron 1 of 3)	10	76846784	76865409	18626	2	Gm3137	rna-NR_152191.1	3001
chr10	76868775	76869432	658	*	A_WT_peak_1898	46	4.06435	8.1326	4.65944	226	Promoter (<=1kb)	10	76869020	76886261	17242	1	Slc19a1	rna-XM_006513414.5	0
chr10	76947478	76947657	180	*	A_WT_peak_1899	19	3.2582	4.80684	1.9411	156	Intron (rna-XM_011243346.4/gene-Col18a1, intron 2 of 41)	10	76888013	76948786	60774	2	Col18a1	rna-XM_011243346.4	1129
chr10	76970662	76970964	303	*	A_WT_peak_1900	97	5.70433	13.7586	9.74796	236	Promoter (1-2kb)	10	76972893	76974075	1183	1	Gm7775	gene-Gm7775	-1929
chr10	76988243	76988480	238	*	A_WT_peak_1901	27	3.56893	5.82879	2.71523	7	Intron (rna-NM_009929.3/gene-Col18a1, intron 2 of 41)	10	76888013	77002364	114352	2	Col18a1	rna-NM_009929.3	13884
chr10	76991995	76992236	242	*	A_WT_peak_1902	83	5.1801	12.2146	8.33002	153	Intron (rna-NM_009929.3/gene-Col18a1, intron 2 of 41)	10	76888013	77002364	114352	2	Col18a1	rna-NM_009929.3	10128
chr10	77094690	77095118	429	*	A_WT_peak_1903	204	7.4904	25.2352	20.4711	326	Promoter (<=1kb)	10	77093599	77095057	1459	2	Gm10941	rna-NR_026944.1	0
chr10	77131559	77131800	242	*	A_WT_peak_1904	17	3.10473	4.52434	1.73038	2	Exon (rna-XM_036155502.1/gene-Adarb1, exon 9 of 10)	10	77095134	77105420	10287	1	Pofut2	rna-NM_030262.3	36425
chr10	77164093	77164390	298	*	A_WT_peak_1905	57	4.97355	9.35306	5.73731	204	Intron (rna-XM_036155502.1/gene-Adarb1, intron 1 of 9)	10	77126561	77175805	49245	2	Adarb1	rna-XM_036155502.1	11415
chr10	77196395	77196748	354	*	A_WT_peak_1906	33	4.47702	6.64583	3.37974	84	Intron (rna-XM_030244823.2/gene-Adarb1, intron 1 of 10)	10	77126561	77179809	53249	2	Adarb1	rna-XM_006513063.4	-16586
chr10	77265281	77265504	224	*	A_WT_peak_1907	20	3.48271	4.99289	2.08143	173	Distal Intergenic	10	77267571	77268130	560	2	Gm51791	rna-XM_030245426.1	2626
chr10	77271087	77271262	176	*	A_WT_peak_1908	15	3.14922	4.22101	1.55602	27	Promoter (2-3kb)	10	77267571	77268130	560	2	Gm51791	rna-XM_030245426.1	-2957
chr10	77323325	77323590	266	*	A_WT_peak_1909	26	3.50965	5.71446	2.6233	88	3' UTR	10	77306429	77308298	1870	1	Gm35983	rna-XR_380590.1	16896
chr10	77339394	77339756	363	*	A_WT_peak_1910	60	5.18843	9.75254	6.09682	50	Exon (rna-NM_133998.3/gene-Fam207a, exon 3 of 6)	10	77322489	77351647	29159	2	Fam207a	rna-NM_133998.3	11891
chr10	77417195	77418043	849	*	A_WT_peak_1911	78	5.11503	11.7128	7.87215	290	Promoter (<=1kb)	10	77417489	77434566	17078	1	Pttg1ip	rna-NM_145925.3	0
chr10	77442304	77442666	363	*	A_WT_peak_1912	148	6.13275	19.295	14.8891	94	Promoter (<=1kb)	10	77442432	77454165	11734	1	Sumo3	rna-NM_001301671.1	0
chr10	77443068	77443348	281	*	A_WT_peak_1913	59	4.07973	9.57479	5.93647	7	Intron (rna-NM_001301672.1/gene-Sumo3, intron 1 of 3)	10	77442432	77454165	11734	1	Sumo3	rna-NM_001301671.1	636
chr10	77458243	77458442	200	*	A_WT_peak_1914	59	4.75858	9.59493	5.95463	70	Exon (rna-NM_019803.3/gene-Ube2g2, exon 1 of 6)	10	77458155	77481824	23670	1	Ube2g2	rna-NM_019803.3	88
chr10	77471582	77471774	193	*	A_WT_peak_1915	18	3.46199	4.74411	1.89411	155	Intron (rna-NM_019803.3/gene-Ube2g2, intron 3 of 5)	10	77477058	77477141	84	1	Mir1930	rna-NR_035451.1	-5284
chr10	77586327	77586560	234	*	A_WT_peak_1916	28	4.09165	6.01648	2.86807	185	3' UTR	10	77586205	77587257	1053	2	Gm9736	rna-NM_001370808.1	697
chr10	77594621	77594797	177	*	A_WT_peak_1917	22	3.99228	5.16131	2.20837	121	3' UTR	10	77594551	77595672	1122	2	Gm3233	rna-NM_001370831.1	875
chr10	77606606	77606755	150	*	A_WT_peak_1918	27	4.34464	5.92595	2.79418	77	Exon (rna-NM_001101630.1/gene-Gm3238, exon 1 of 1)	10	77606467	77607159	693	2	Gm3238	rna-NM_001101630.1	404
chr10	77654403	77654739	337	*	A_WT_peak_1919	59	5.28474	9.57979	5.9409	110	Intron (rna-XM_017313941.2/gene-Tspear, intron 1 of 7)	10	77650456	77651238	783	1	Gm2696	rna-NM_001205009.2	3947
chr10	77726799	77726973	175	*	A_WT_peak_1920	22	3.66745	5.30798	2.29958	131	Promoter (2-3kb)	10	77729254	77731945	2692	1	1700009J07Rik	rna-NR_015547.1	-2281
chr10	77738606	77738855	250	*	A_WT_peak_1921	57	4.64523	9.36325	5.74654	43	Promoter (<=1kb)	10	77733409	77738370	4962	2	Lrrc3	rna-NM_145152.4	-236
chr10	77905753	77905940	188	*	A_WT_peak_1922	28	3.94453	6.02267	2.87268	12	Intron (rna-XM_036155889.1/gene-Icosl, intron 1 of 5)	10	77901791	77906309	4519	2	Gm51775	rna-XR_003948913.2	369
chr10	77926768	77926934	167	*	A_WT_peak_1923	30	4.25176	6.27936	3.0729	24	Distal Intergenic	10	77901791	77906309	4519	2	Gm51775	rna-XR_003948913.2	-20459
chr10	78005403	78005893	491	*	A_WT_peak_1924	69	4.51575	10.6609	6.91593	209	Promoter (<=1kb)	10	77997900	78005589	7690	2	Gatd3a	rna-NM_001364646.1	0
chr10	78033232	78033806	575	*	A_WT_peak_1925	40	3.84879	7.3934	4.01393	511	Exon (rna-NM_001081055.2/gene-Trappc10, exon 19 of 23)	10	78006743	78021005	14263	2	Pwp2	rna-XR_001779417.1	-12227
chr10	78072653	78072840	188	*	A_WT_peak_1926	15	3.15635	4.23307	1.56388	172	Intron (rna-NM_001081055.2/gene-Trappc10, intron 1 of 22)	10	78021256	78080479	59224	2	Trappc10	rna-NM_001081055.2	7639
chr10	78079884	78080161	278	*	A_WT_peak_1927	59	4.93772	9.61972	5.97654	254	Intron (rna-NM_001081055.2/gene-Trappc10, intron 1 of 22)	10	78021256	78080479	59224	2	Trappc10	rna-NM_001081055.2	318
chr10	78080519	78081036	518	*	A_WT_peak_1928	103	6.42143	14.435	10.3734	277	Promoter (<=1kb)	10	78021256	78080479	59224	2	Trappc10	rna-NM_001081055.2	-40
chr10	78147674	78147888	215	*	A_WT_peak_1929	15	2.95444	4.24336	1.57128	148	Promoter (<=1kb)	10	78105008	78147847	42840	2	Agpat3	rna-XM_006513723.5	0
chr10	78235558	78235829	272	*	A_WT_peak_1930	62	4.73857	9.87996	6.21104	147	Distal Intergenic	10	78229138	78229590	453	1	Gm10146	gene-Gm10146	6420
chr10	78248792	78249184	393	*	A_WT_peak_1931	76	5.18986	11.5196	7.69596	167	Promoter (<=1kb)	10	78236196	78248877	12682	2	Rrp1	rna-NM_010925.2	0
chr10	78288742	78288911	170	*	A_WT_peak_1932	17	3.03479	4.58199	1.77316	29	Intron (rna-NM_172134.2/gene-Pdxk, intron 2 of 10)	10	78280929	78280991	63	2	Mir6908	rna-NR_105873.1	-7751
chr10	78300604	78300776	173	*	A_WT_peak_1933	34	3.7689	6.71126	3.43445	124	5' UTR	10	78272581	78300782	28202	2	Pdxk	rna-NM_172134.2	6
chr10	78318268	78318454	187	*	A_WT_peak_1934	32	4.34901	6.43803	3.20402	42	Distal Intergenic	10	78322922	78329356	6435	1	Gm30232	rna-XR_380601.5	-4468
chr10	78410335	78410852	518	*	A_WT_peak_1935	59	5.10714	9.60219	5.96108	434	Promoter (<=1kb)	10	78410347	78420336	9990	1	Ilvbl	rna-NM_001359301.1	0
chr10	78425057	78425223	167	*	A_WT_peak_1936	30	4.10162	6.29166	3.08301	52	Exon (rna-XR_001779604.2/gene-Syde1, exon 3 of 7)	10	78420336	78427792	7457	2	Syde1	rna-XR_001779604.2	2569
chr10	78933180	78933523	344	*	A_WT_peak_1937	86	6.29453	12.5258	8.61509	251	Promoter (<=1kb)	10	78900208	78933434	33227	2	2610008E11Rik	rna-NM_001004362.2	0
chr10	79410249	79410450	202	*	A_WT_peak_1938	17	3.35374	4.56439	1.76021	196	Distal Intergenic	10	79415662	79426270	10609	1	Gm51808	rna-XR_003949013.1	-5212
chr10	79461732	79461935	204	*	A_WT_peak_1939	27	3.36304	5.86732	2.7463	105	Exon (rna-NM_001024539.1/gene-Shc2, exon 9 of 13)	10	79453768	79473752	19985	2	Shc2	rna-NM_001024539.1	11817
chr10	79462091	79462274	184	*	A_WT_peak_1940	27	3.34218	5.82285	2.71035	33	Exon (rna-NM_001024539.1/gene-Shc2, exon 8 of 13)	10	79453768	79473752	19985	2	Shc2	rna-NM_001024539.1	11478
chr10	79517534	79517909	376	*	A_WT_peak_1941	79	4.57519	11.7645	7.92025	273	Promoter (<=1kb)	10	79518029	79524232	6204	1	Cdc34	rna-NM_001359817.1	-120
chr10	79540068	79540315	248	*	A_WT_peak_1942	168	5.86008	21.3907	16.8561	124	Promoter (<=1kb)	10	79540192	79547813	7622	1	Bsg	rna-NM_001077184.1	0
chr10	79565514	79565729	216	*	A_WT_peak_1943	22	3.09719	5.29203	2.28939	46	Intron (rna-NM_008226.2/gene-Hcn2, intron 4 of 7)	10	79552468	79571942	19475	1	Hcn2	rna-NM_008226.2	13046
chr10	79582292	79582485	194	*	A_WT_peak_1944	74	4.89291	11.2164	7.42064	177	Promoter (<=1kb)	10	79571951	79582436	10486	2	Polrmt	rna-XM_030245018.2	0
chr10	79592454	79592608	155	*	A_WT_peak_1945	24	3.07601	5.4416	2.40551	147	Exon (rna-XM_030245228.2/gene-Fgf22, exon 2 of 2)	10	79590943	79593356	2414	1	Fgf22	rna-NM_023304.2	1511
chr10	79593713	79593887	175	*	A_WT_peak_1946	21	2.92236	5.08543	2.15182	138	Downstream (<=300bp)	10	79590943	79593356	2414	1	Fgf22	rna-NM_023304.2	2770
chr10	79602886	79603494	609	*	A_WT_peak_1947	218	6.54481	26.6467	21.8036	81	Promoter (<=1kb)	10	79594349	79602786	8438	2	Rnf126	rna-NR_027505.2	-100
chr10	79610501	79610697	197	*	A_WT_peak_1948	28	3.22948	6.00079	2.85486	18	Promoter (2-3kb)	10	79613108	79618464	5357	1	Fstl3	rna-NM_031380.2	-2411
chr10	79615938	79616665	728	*	A_WT_peak_1949	249	7.27269	29.9885	24.9545	182	Exon (rna-NM_031380.2/gene-Fstl3, exon 3 of 5)	10	79613108	79618464	5357	1	Fstl3	rna-NM_031380.2	2830
chr10	79676571	79676770	200	*	A_WT_peak_1950	42	4.13524	7.72169	4.29835	116	Distal Intergenic	10	79690266	79700269	10004	1	Ptbp1	rna-NM_001077363.2	-13496
chr10	79690012	79690563	552	*	A_WT_peak_1951	219	6.46374	26.815	21.9615	328	Promoter (<=1kb)	10	79690266	79700269	10004	1	Ptbp1	rna-NM_001077363.2	0
chr10	79701208	79701390	183	*	A_WT_peak_1952	16	2.62937	4.3862	1.65115	155	Exon (rna-NM_181681.2/gene-Plppr3, exon 7 of 7)	10	79698463	79698484	22	1	rna-NR_105875.1	rna-Mir6910-2	2745
chr10	79717332	79717663	332	*	A_WT_peak_1953	72	4.6619	11.0125	7.23563	90	Intron (rna-NM_011178.2/gene-Prtn3, intron 3 of 4)	10	79715501	79719008	3508	1	Prtn3	rna-NM_011178.2	1831
chr10	79727519	79727734	216	*	A_WT_peak_1954	27	3.16998	5.86114	2.74175	105	Exon (rna-NM_001291915.2/gene-Cfd, exon 3 of 5)	10	79726687	79728489	1803	1	Cfd	rna-NM_013459.4	832
chr10	79744218	79744792	575	*	A_WT_peak_1955	233	6.88936	28.256	23.3186	253	Promoter (<=1kb)	10	79730540	79744772	14233	2	Med16	rna-NM_001359629.1	0
chr10	79756110	79756270	161	*	A_WT_peak_1956	33	3.28326	6.55785	3.30546	119	Intron (rna-XR_004936040.1/gene-Kiss1r, intron 2 of 5)	10	79754345	79759922	5578	1	Kiss1r	rna-XR_380346.5	1765
chr10	79795634	79796249	616	*	A_WT_peak_1957	114	4.96683	15.5573	11.4108	123	Promoter (<=1kb)	10	79795964	79805081	9118	1	Wdr18	rna-XM_030245020.2	0
chr10	79803075	79803261	187	*	A_WT_peak_1958	20	2.75037	5.01135	2.09558	132	Promoter (2-3kb)	10	79806227	79810824	4598	1	Grin3b	rna-XM_006513289.3	-2966
chr10	79820205	79820950	746	*	A_WT_peak_1959	216	6.12932	26.4854	21.6505	683	Promoter (<=1kb)	10	79812954	79820159	7206	2	Tmem259	rna-XM_006513491.1	-46
chr10	79851469	79851843	375	*	A_WT_peak_1960	47	3.67524	8.26138	4.76979	163	Promoter (<=1kb)	10	79852505	79867304	14800	1	Arhgap45	rna-XM_030245276.2	-662
chr10	79864259	79864422	164	*	A_WT_peak_1961	25	3.13088	5.56708	2.5055	130	Intron (rna-XM_030245276.2/gene-Arhgap45, intron 18 of 21)	10	79856981	79867304	10324	1	Arhgap45	rna-XM_006514110.1	7278
chr10	79875560	79875758	199	*	A_WT_peak_1962	129	5.51952	17.1827	12.9216	59	Promoter (<=1kb)	10	79871787	79875493	3707	2	Polr2e	rna-NM_025554.2	-67
chr10	79889172	79889553	382	*	A_WT_peak_1963	101	4.6274	14.1778	10.1347	227	Promoter (<=1kb)	10	79889399	79892273	2875	1	Gpx4	rna-NM_008162.4	0
chr10	79902809	79903058	250	*	A_WT_peak_1964	59	3.71404	9.63472	5.99035	50	Intron (rna-NM_001359635.1/gene-Sbno2, intron 12 of 31)	10	79898250	79911273	13024	2	Sbno2	rna-NM_001359636.1	8215
chr10	79918972	79919130	159	*	A_WT_peak_1965	22	2.90255	5.21988	2.25323	109	Intron (rna-NM_001359635.1/gene-Sbno2, intron 3 of 31)	10	79892831	79911527	18697	2	Sbno2	rna-XM_017313890.3	-7445
chr10	79951230	79951679	450	*	A_WT_peak_1966	411	8.81282	46.9367	41.1397	142	Promoter (<=1kb)	10	79951602	79966513	14912	1	Stk11	rna-XR_003948638.2	0
chr10	79985101	79985345	245	*	A_WT_peak_1967	49	3.07631	8.41515	4.90535	151	Promoter (<=1kb)	10	79985516	79994202	8687	1	Midn	rna-NM_001305799.1	-171
chr10	79995354	79995971	618	*	A_WT_peak_1968	53	3.41129	8.93102	5.36294	495	Distal Intergenic	10	80001824	80007489	5666	1	Cirbp	rna-NM_001379422.1	-5853
chr10	80003427	80003790	364	*	A_WT_peak_1969	198	5.82923	24.5411	19.8183	190	Promoter (<=1kb)	10	80003673	80007489	3817	1	Cirbp	rna-NM_001379421.1	0
chr10	80035465	80035657	193	*	A_WT_peak_1970	23	3.46769	5.4081	2.37859	118	Distal Intergenic	10	80015316	80025844	10529	1	Efna2	rna-NM_007909.3	20149
chr10	80048434	80048658	225	*	A_WT_peak_1971	24	3.51578	5.49761	2.45017	23	Distal Intergenic	10	80062265	80079866	17602	1	Pwwp3a	rna-XM_030245246.1	-13607
chr10	80056944	80057233	290	*	A_WT_peak_1972	21	3.20768	5.1207	2.17752	41	Distal Intergenic	10	80062265	80079866	17602	1	Pwwp3a	rna-XM_030245246.1	-5032
chr10	80062174	80062722	549	*	A_WT_peak_1973	300	7.98366	35.3435	30.0332	136	Promoter (<=1kb)	10	80062265	80079866	17602	1	Pwwp3a	rna-XM_030245246.1	0
chr10	80076737	80076886	150	*	A_WT_peak_1974	18	2.69169	4.69794	1.86059	143	Exon (rna-XM_030245246.1/gene-Pwwp3a, exon 12 of 14)	10	80084798	80084870	73	2	n-TFgaa3	rna-n-TFgaa3	7984
chr10	80080305	80080504	200	*	A_WT_peak_1975	46	3.51421	8.07284	4.60746	6	3' UTR	10	80084798	80084870	73	2	n-TFgaa3	rna-n-TFgaa3	4366
chr10	80085087	80085518	432	*	A_WT_peak_1976	40	3.35134	7.39518	4.01546	274	Promoter (<=1kb)	10	80085283	80092628	7346	1	Ndufs7	rna-NM_001364694.1	0
chr10	80096735	80097580	846	*	A_WT_peak_1977	130	4.36235	17.3329	13.0594	391	Promoter (<=1kb)	10	80097168	80124239	27072	1	Dazap1	rna-XM_030245259.2	0
chr10	80119652	80119876	225	*	A_WT_peak_1978	32	3.27922	6.54776	3.29653	123	Intron (rna-XM_030245259.2/gene-Dazap1, intron 8 of 11)	10	80114046	80114066	21	1	rna-NR_105876.1	rna-Mir6911-2	5606
chr10	80131346	80131587	242	*	A_WT_peak_1979	32	3.11893	6.54692	3.29596	3	Promoter (<=1kb)	10	80131790	80154091	22302	1	Apc2	rna-NM_001372237.1	-203
chr10	80133041	80133834	794	*	A_WT_peak_1980	53	3.63801	8.90754	5.34213	466	Promoter (1-2kb)	10	80134900	80154091	19192	1	Apc2	rna-XM_006513646.5	-1066
chr10	80138250	80138419	170	*	A_WT_peak_1981	33	3.29138	6.57811	3.32268	4	Exon (rna-NM_001372237.1/gene-Apc2, exon 4 of 15)	10	80137654	80154090	16437	1	Apc2	rna-NM_011789.2	596
chr10	80150978	80151315	338	*	A_WT_peak_1982	45	3.48714	7.99802	4.54144	209	Exon (rna-NM_001372237.1/gene-Apc2, exon 15 of 15)	10	80154089	80156382	2294	2	2310011J03Rik	rna-NM_025521.3	5067
chr10	80165322	80165956	635	*	A_WT_peak_1983	351	7.8749	40.6619	35.1061	433	Promoter (<=1kb)	10	80157121	80165559	8439	2	Pcsk4	rna-XM_006513363.5	0
chr10	80179361	80179531	171	*	A_WT_peak_1984	15	2.67297	4.17513	1.52274	71	Exon (rna-NM_001285435.1/gene-Adamtsl5, exon 7 of 13)	10	80175655	80183171	7517	2	Adamtsl5	rna-XM_011243528.2	3640
chr10	80194211	80194378	168	*	A_WT_peak_1985	24	3.16544	5.44151	2.40547	78	Intron (rna-NM_001347124.1/gene-Plk5, intron 3 of 14)	10	80193854	80201323	7470	1	Plk5	rna-XM_006513502.4	357
chr10	80235359	80235760	402	*	A_WT_peak_1986	258	6.85976	30.948	25.8642	88	Promoter (<=1kb)	10	80228373	80235365	6993	2	Mbd3	rna-NM_001306143.1	0
chr10	80242436	80242654	219	*	A_WT_peak_1987	41	3.50516	7.57508	4.17159	75	5' UTR	10	80238831	80242655	3825	2	Uqcr11	rna-NM_025650.2	1
chr10	80250120	80250285	166	*	A_WT_peak_1988	17	2.68823	4.52882	1.7341	2	Intron (rna-XM_017313872.3/gene-Tcf3, intron 14 of 16)	10	80245375	80257696	12322	2	Tcf3	rna-XM_017313872.3	7411
chr10	80269553	80269961	409	*	A_WT_peak_1989	87	4.92432	12.6606	8.73927	321	Promoter (<=1kb)	10	80245375	80269814	24440	2	Tcf3	rna-XM_030244995.2	0
chr10	80293331	80293578	248	*	A_WT_peak_1990	61	4.68025	9.75708	6.10096	181	Distal Intergenic	10	80307243	80311214	3972	2	Gm40716	rna-XR_871876.1	17636
chr10	80326418	80326578	161	*	A_WT_peak_1991	22	3.38179	5.24712	2.27524	28	Distal Intergenic	10	80330740	80353100	22361	1	Onecut3	rna-NM_139226.3	-4162
chr10	80369835	80369994	160	*	A_WT_peak_1992	24	3.19358	5.5028	2.45508	8	Intron (rna-XM_006513984.3/gene-Atp8b3, intron 6 of 26)	10	80355419	80374958	19540	2	Atp8b3	rna-NM_026094.3	4964
chr10	80394401	80394891	491	*	A_WT_peak_1993	77	4.27873	11.5722	7.74386	224	Intron (rna-NM_025852.3/gene-Rexo1, intron 1 of 14)	10	80376760	80397394	20635	2	Rexo1	rna-NM_025852.3	2503
chr10	80397424	80397618	195	*	A_WT_peak_1994	43	3.4738	7.72721	4.30348	37	Promoter (<=1kb)	10	80376760	80397394	20635	2	Rexo1	rna-NM_025852.3	-30
chr10	80403902	80404097	196	*	A_WT_peak_1995	31	3.31934	6.4284	3.19633	61	3' UTR	10	80381777	80400624	18848	2	Rexo1	rna-XR_004936254.1	-3278
chr10	80413243	80413619	377	*	A_WT_peak_1996	151	5.53555	19.5509	15.1291	292	Promoter (<=1kb)	10	80402955	80413130	10176	2	Klf16	rna-NM_078477.2	-113
chr10	80425964	80426578	615	*	A_WT_peak_1997	114	4.87149	15.6092	11.4588	296	Promoter (<=1kb)	10	80419483	80426175	6693	2	Abhd17a	rna-NM_145421.2	0
chr10	80438606	80439039	434	*	A_WT_peak_1998	48	3.80727	8.34255	4.84066	50	Promoter (<=1kb)	10	80438714	80443488	4775	1	Adat3	rna-NM_001100606.1	0
chr10	80457900	80458526	627	*	A_WT_peak_1999	616	9.67442	67.9445	61.652	410	Promoter (<=1kb)	10	80458465	80476580	18116	1	Csnk1g2	rna-XM_006513011.3	0
chr10	80502808	80503158	351	*	A_WT_peak_2000	36	3.06363	6.98666	3.66968	175	3' UTR	10	80501157	80512122	10966	2	Mknk2	rna-XM_017313824.3	8964
chr10	80512164	80512753	590	*	A_WT_peak_2001	296	6.81193	34.9408	29.6525	171	Promoter (<=1kb)	10	80501157	80512264	11108	2	Mknk2	rna-XM_006513316.3	0
chr10	80537777	80538486	710	*	A_WT_peak_2002	290	6.67278	34.3606	29.0988	326	Promoter (<=1kb)	10	80537858	80541209	3352	1	Izumo4	rna-XM_017314096.3	0
chr10	80558891	80559068	178	*	A_WT_peak_2003	30	3.08566	6.25677	3.05474	80	Intron (rna-NM_007460.2/gene-Ap3d1, intron 8 of 30)	10	80542790	80578109	35320	2	Ap3d1	rna-NM_007460.2	19041
chr10	80577906	80578568	663	*	A_WT_peak_2004	306	8.52277	36.0007	30.6616	317	Promoter (<=1kb)	10	80542790	80578109	35320	2	Ap3d1	rna-NM_007460.2	0
chr10	80590888	80591101	214	*	A_WT_peak_2005	88	4.36297	12.731	8.80284	18	Promoter (<=1kb)	10	80590935	80628068	37134	1	Dot1l	rna-XR_004936134.1	0
chr10	80602175	80602364	190	*	A_WT_peak_2006	25	3.24163	5.60691	2.53675	37	Intron (rna-XR_004936134.1/gene-Dot1l, intron 3 of 27)	10	80591037	80631295	40259	1	Dot1l	rna-NM_199322.2	11138
chr10	80623403	80623634	232	*	A_WT_peak_2007	37	3.01339	7.02627	3.70322	177	Intron (rna-XR_004936134.1/gene-Dot1l, intron 22 of 27)	10	80631933	80634089	2157	2	Plekhj1	rna-XM_017314165.1	10455
chr10	80634115	80634327	213	*	A_WT_peak_2008	50	3.28743	8.52643	5.0033	97	Promoter (<=1kb)	10	80631933	80634089	2157	2	Plekhj1	rna-XM_017314165.1	-26
chr10	80642081	80642374	294	*	A_WT_peak_2009	36	3.00282	6.99292	3.67478	49	Exon (rna-NM_007445.3/gene-Amh, exon 3 of 5)	10	80641074	80643513	2440	1	Amh	rna-NM_007445.3	1007
chr10	80661915	80662452	538	*	A_WT_peak_2010	222	6.43656	27.1627	22.2893	304	Promoter (<=1kb)	10	80662490	80665124	2635	1	Oaz1	rna-NM_001301034.1	-38
[truncated: 21,144 more rows]

## Sheet: Xap5l CUT&Tag peaks annotation
seqnames	start	end	width	strand	peakName	colorScore	fold_enrichment	X.log10.pvalue	X.log10.qvalue	relative_summit_position	annotation	geneChr	geneStart	geneEnd	geneLength	geneStrand	geneId	transcriptId	distanceToTSS
NT_187064.1	2005	2833	829	*	B_WT_peak_3	114	4.74072	17.2022	11.4291	343	Promoter (1-2kb)	40	4564	52729	48166	1	LOC100861749	rna-XR_001782945.3	-1731
NT_187064.1	9260	9529	270	*	B_WT_peak_4	48	3.63223	10.1311	4.87812	44	Intron (rna-XR_001782945.3/gene-LOC100861749, intron 2 of 28)	40	4564	52729	48166	1	LOC100861749	rna-XR_001782945.3	4696
NT_187064.1	14194	14386	193	*	B_WT_peak_5	14	2.79545	4.95659	1.45307	58	Exon (rna-XR_001782945.3/gene-LOC100861749, exon 3 of 29)	40	13019	20242	7224	2	LOC118568478	rna-XR_004940612.1	5856
NT_187064.1	26930	27257	328	*	B_WT_peak_6	72	3.55261	12.7644	7.23037	211	Exon (rna-XR_001782945.3/gene-LOC100861749, exon 7 of 29)	40	33886	35505	1620	1	LOC100861738	gene-LOC100861738	-6629
NT_187064.1	27955	28280	326	*	B_WT_peak_7	76	3.40518	13.253	7.68285	190	Exon (rna-XR_001782945.3/gene-LOC100861749, exon 8 of 29)	40	33886	35505	1620	1	LOC100861738	gene-LOC100861738	-5606
NT_187064.1	31443	31674	232	*	B_WT_peak_8	122	3.63444	18.0868	12.2856	141	Promoter (2-3kb)	40	33886	35505	1620	1	LOC100861738	gene-LOC100861738	-2212
NT_187064.1	32283	33230	948	*	B_WT_peak_9	46	2.85726	9.89967	4.68264	896	Promoter (<=1kb)	40	33886	35505	1620	1	LOC100861738	gene-LOC100861738	-656
NT_187064.1	33966	34217	252	*	B_WT_peak_10	51	2.97596	10.4974	5.18875	91	Exon (gene-LOC100861738/gene-LOC100861738, exon 1 of 1)	40	33886	35505	1620	1	LOC100861738	gene-LOC100861738	80
NT_187064.1	34403	34588	186	*	B_WT_peak_11	16	2.27581	5.5217	1.64119	150	Exon (gene-LOC100861738/gene-LOC100861738, exon 1 of 1)	40	33886	35505	1620	1	LOC100861738	gene-LOC100861738	517
NT_187064.1	39558	39824	267	*	B_WT_peak_12	89	3.52647	14.5623	8.91763	94	Exon (rna-XR_001782945.3/gene-LOC100861749, exon 13 of 29)	40	33886	35505	1620	1	LOC100861738	gene-LOC100861738	5672
NT_187064.1	40068	40392	325	*	B_WT_peak_13	219	4.97354	28.2216	21.9801	123	Exon (rna-XR_001782945.3/gene-LOC100861749, exon 14 of 29)	40	33886	35505	1620	1	LOC100861738	gene-LOC100861738	6182
NT_187064.1	43951	44306	356	*	B_WT_peak_14	124	3.66151	18.2502	12.4404	122	Exon (rna-XR_001782945.3/gene-LOC100861749, exon 18 of 29)	40	33886	35505	1620	1	LOC100861738	gene-LOC100861738	10065
NT_187064.1	47356	47595	240	*	B_WT_peak_15	113	3.54885	17.0844	11.3212	86	Exon (rna-XR_001782945.3/gene-LOC100861749, exon 19 of 29)	40	52674	59689	7016	2	Pisd-ps3	rna-NR_003518.3	12094
NT_187064.1	47895	48085	191	*	B_WT_peak_16	26	2.39031	7.18316	2.63559	122	Exon (rna-XR_001782945.3/gene-LOC100861749, exon 20 of 29)	40	52674	59689	7016	2	Pisd-ps3	rna-NR_003518.3	11604
NT_187064.1	48298	48470	173	*	B_WT_peak_17	63	2.91639	11.8425	6.37534	39	Intron (rna-XR_001782945.3/gene-LOC100861749, intron 20 of 28)	40	52674	59689	7016	2	Pisd-ps3	rna-NR_003518.3	11219
NT_187064.1	50269	50603	335	*	B_WT_peak_18	39	2.51647	8.97704	3.91285	293	Exon (rna-XR_001782945.3/gene-LOC100861749, exon 25 of 29)	40	52674	59689	7016	2	Pisd-ps3	rna-NR_003518.3	9086
NT_187064.1	53346	54119	774	*	B_WT_peak_19	284	5.18323	34.8464	28.4177	517	Exon (rna-NR_003518.3/gene-Pisd-ps3, exon 7 of 7)	40	52674	59689	7016	2	Pisd-ps3	rna-NR_003518.3	5570
NT_187064.1	55026	55255	230	*	B_WT_peak_20	73	3.13927	12.9334	7.38361	110	Exon (rna-NR_003518.3/gene-Pisd-ps3, exon 5 of 7)	40	52674	59689	7016	2	Pisd-ps3	rna-NR_003518.3	4434
NT_187064.1	58858	59078	221	*	B_WT_peak_21	45	3.01275	9.71944	4.52968	8	Intron (rna-NR_003518.3/gene-Pisd-ps3, intron 1 of 6)	40	52674	59689	7016	2	Pisd-ps3	rna-NR_003518.3	611
NT_187064.1	59551	59770	220	*	B_WT_peak_22	100	3.937	15.7688	10.0668	64	Promoter (<=1kb)	40	52674	59689	7016	2	Pisd-ps3	rna-NR_003518.3	0
NW_023337853.1	533	782	250	*	B_WT_peak_23	39	2.84752	8.96925	3.90896	49	Distal Intergenic	42	12961	27820	14860	2	LOC118568479	rna-XR_004940613.1	27038
NW_023337853.1	3936	4411	476	*	B_WT_peak_24	313	4.80885	37.8356	31.3169	201	Distal Intergenic	42	12961	27820	14860	2	LOC118568479	rna-XR_004940613.1	23409
NW_023337853.1	8766	9419	654	*	B_WT_peak_25	86	3.0565	14.2282	8.60209	461	Distal Intergenic	42	12961	27820	14860	2	LOC118568479	rna-XR_004940613.1	18401
NW_023337853.1	14116	14299	184	*	B_WT_peak_26	54	3.61005	10.7969	5.45543	132	Exon (rna-XR_004940613.1/gene-LOC118568479, exon 2 of 2)	42	12961	27820	14860	2	LOC118568479	rna-XR_004940613.1	13521
NW_023337853.1	27911	28150	240	*	B_WT_peak_27	22	2.84225	6.65642	2.27268	170	Promoter (<=1kb)	42	12961	27820	14860	2	LOC118568479	rna-XR_004940613.1	-91
NW_023337853.1	29970	31077	1108	*	B_WT_peak_28	599	10.1688	67.1511	59.9228	571	Promoter (2-3kb)	42	12961	27820	14860	2	LOC118568479	rna-XR_004940613.1	-2150
chr1	4311826	4312003	178	*	B_WT_peak_29	15	4.35809	5.45345	1.59742	112	Intron (rna-XM_030252325.2/gene-Rp1, intron 12 of 24)	1	4326258	4330737	4480	2	Gm6101	gene-Gm6101	18734
chr1	5664565	5664938	374	*	B_WT_peak_30	25	5.15378	6.99427	2.50316	196	Intron (rna-XM_006495470.1/gene-Oprk1, intron 1 of 2)	1	5658716	5676356	17641	1	Oprk1	rna-NM_011011.2	5849
chr1	12812849	12813050	202	*	B_WT_peak_31	19	4.67405	6.06131	1.98117	86	Intron (rna-XM_006495510.4/gene-Sulf1, intron 2 of 20)	1	12834607	12931131	96525	1	Sulf1	rna-XM_036164701.1	-21557
chr1	13133019	13133205	187	*	B_WT_peak_32	18	4.46583	5.89533	1.88011	139	Downstream (<=300bp)	1	13132146	13132761	616	1	Gm5250	gene-Gm5250	873
chr1	16819369	16819550	182	*	B_WT_peak_33	15	4.24373	5.36939	1.59742	62	Distal Intergenic	1	16758680	16779829	21150	1	Ly96	rna-NM_016923.2	60689
chr1	17167687	17167902	216	*	B_WT_peak_34	29	5.40417	7.59804	2.92787	141	5' UTR	1	17065162	17168113	102952	2	Jph1	rna-NM_020604.2	211
chr1	22391410	22391716	307	*	B_WT_peak_35	22	4.95673	6.67353	2.27901	158	Promoter (2-3kb)	1	22356196	22389299	33104	2	Rims1	rna-XM_036154452.1	-2111
chr1	22951961	22952285	325	*	B_WT_peak_36	28	5.42328	7.44374	2.81699	43	Distal Intergenic	1	22937468	22944162	6695	1	Gm7759	rna-NR_151543.1	14493
chr1	23785891	23786100	210	*	B_WT_peak_37	33	5.67829	8.28293	3.39599	139	Distal Intergenic	1	23801007	23886946	85940	1	B3gat2	rna-NM_172124.2	-14907
chr1	24412024	24412207	184	*	B_WT_peak_38	21	4.62358	6.36159	2.17133	3	Intron (rna-NM_007733.2/gene-Col19a1, intron 16 of 50)	1	24587922	24588058	137	2	Gm26418	rna-XR_004936757.1	175851
chr1	24976388	24976570	183	*	B_WT_peak_39	19	4.65047	6.02252	1.95679	170	Distal Intergenic	1	25051022	25051840	819	1	Gm9443	gene-Gm9443	-74452
chr1	26726252	26726866	615	*	B_WT_peak_40	34	4.97802	8.37449	3.46226	377	Promoter (<=1kb)	1	26720882	26726541	5660	2	4931408C20Rik	rna-NM_001033764.3	0
chr1	28199111	28199296	186	*	B_WT_peak_41	35	5.9328	8.46934	3.53478	122	Distal Intergenic	1	27923127	27941268	18142	1	Gm5524	rna-NR_151583.1	275984
chr1	28661969	28662414	446	*	B_WT_peak_42	29	5.60326	7.75245	2.99278	271	Distal Intergenic	1	28619462	28619849	388	2	Gm7846	gene-Gm7846	-42120
chr1	29675556	29675730	175	*	B_WT_peak_43	15	4.21811	5.2173	1.59374	17	Distal Intergenic	1	29523605	29525015	1411	2	Gm5525	gene-Gm5525	-150541
chr1	30759539	30759943	405	*	B_WT_peak_44	29	5.32077	7.7131	2.99278	125	Intron (rna-XR_004935880.1/gene-Gm39615, intron 1 of 3)	1	30758478	30758621	144	1	LOC115487655	rna-XR_004936779.1	1061
chr1	36238088	36238291	204	*	B_WT_peak_45	46	6.6633	9.91152	4.69325	99	Intron (rna-NM_198899.2/gene-Uggt1, intron 11 of 40)	1	36179109	36283383	104275	2	Uggt1	rna-NM_198899.2	45092
chr1	38169034	38169244	211	*	B_WT_peak_46	20	4.69786	6.10062	2.00858	122	Promoter (<=1kb)	1	38091867	38169191	77325	2	Rev1	rna-XM_030255641.2	0
chr1	39026517	39026709	193	*	B_WT_peak_47	18	4.39021	5.77737	1.80284	155	Promoter (<=1kb)	1	39026895	39036317	9423	1	Pdcl3	rna-NM_026850.4	-186
chr1	39538689	39538943	255	*	B_WT_peak_48	70	7.28088	12.5565	7.03402	169	Distal Intergenic	1	39558614	39558828	215	1	Gm24826	rna-XR_004936874.1	-19671
chr1	40701452	40701657	206	*	B_WT_peak_49	19	4.67405	6.06131	1.98117	61	Distal Intergenic	1	40720872	40808045	87174	1	Slc9a2	rna-NM_001033289.2	-19215
chr1	41002685	41002952	268	*	B_WT_peak_50	21	4.87164	6.39138	2.185	140	Distal Intergenic	1	40877181	40896047	18867	1	Tmem182	rna-XM_036166211.1	125504
chr1	41747811	41748029	219	*	B_WT_peak_51	22	4.97684	6.57114	2.21581	40	Distal Intergenic	1	41782183	41978758	196576	1	Gm29260	rna-XR_004936043.1	-34154
chr1	42132393	42132567	175	*	B_WT_peak_52	22	4.98068	6.57776	2.21581	170	Distal Intergenic	1	42296970	42349170	52201	1	Gm28175	rna-XR_003947791.2	-164403
chr1	42566249	42566450	202	*	B_WT_peak_53	25	5.15378	6.99427	2.50316	115	Distal Intergenic	1	42528764	42538529	9766	1	LOC118567741	rna-XR_004936067.1	37485
chr1	42942431	42942614	184	*	B_WT_peak_54	17	4.40598	5.62664	1.70714	93	Exon (rna-NM_023514.4/gene-Mrps9, exon 10 of 11)	1	42918915	42944843	25929	1	Mrps9	rna-XM_036153502.1	23516
chr1	45205186	45205365	180	*	B_WT_peak_55	15	4.35809	5.45345	1.59742	30	Distal Intergenic	1	45350698	45388866	38169	1	Col3a1	rna-NM_009930.2	-145333
chr1	45577979	45578300	322	*	B_WT_peak_56	21	4.70916	6.27798	2.11742	164	Distal Intergenic	1	45558767	45559999	1233	2	Gm7063	gene-Gm7063	-17980
chr1	46892630	46892975	346	*	B_WT_peak_57	56	6.80044	11.0218	5.65137	106	Promoter (<=1kb)	1	46846704	46892778	46075	2	Slc39a10	rna-NM_001356416.1	0
chr1	48356340	48356524	185	*	B_WT_peak_58	22	4.98068	6.57776	2.21581	27	Promoter (2-3kb)	1	48352826	48354028	1203	2	Gm5974	gene-Gm5974	-2312
chr1	48737343	48737533	191	*	B_WT_peak_59	20	4.7708	6.22177	2.07817	168	Distal Intergenic	1	48920854	48922084	1231	1	Gm8357	gene-Gm8357	-183321
chr1	48744977	48745172	196	*	B_WT_peak_60	15	4.35809	5.45345	1.59742	13	Distal Intergenic	1	48920854	48922084	1231	1	Gm8357	gene-Gm8357	-175682
chr1	48870436	48870626	191	*	B_WT_peak_61	22	4.98068	6.57776	2.21581	4	Distal Intergenic	1	48920854	48922084	1231	1	Gm8357	gene-Gm8357	-50228
chr1	49618152	49618338	187	*	B_WT_peak_62	22	4.98068	6.57776	2.21581	141	Distal Intergenic	1	49537712	49538142	431	1	Gm3605	gene-Gm3605	80440
chr1	49737994	49738237	244	*	B_WT_peak_63	15	4.26269	5.29184	1.59742	124	Distal Intergenic	1	49537712	49538142	431	1	Gm3605	gene-Gm3605	200282
chr1	51676359	51676543	185	*	B_WT_peak_64	13	3.93037	4.74898	1.32736	55	Intron (rna-XR_373396.1/gene-Gm31636, intron 2 of 2)	1	51661633	51685105	23473	1	Gm31636	rna-XR_373395.1	14726
chr1	52712954	52713163	210	*	B_WT_peak_65	22	4.95012	6.52519	2.21581	28	Intron (rna-NM_001357464.1/gene-Mfsd6, intron 3 of 7)	1	52669864	52691078	21215	1	Nemp2	rna-NR_024590.1	43090
chr1	54477650	54477905	256	*	B_WT_peak_66	29	5.56888	7.69288	2.98956	77	Intron (rna-NM_001033194.3/gene-Gtf3c3, intron 1 of 17)	1	54435036	54478185	43150	2	Gtf3c3	rna-NM_001033194.3	280
chr1	54657470	54657670	201	*	B_WT_peak_67	13	3.98868	4.84226	1.38172	59	Distal Intergenic	1	54605684	54606459	776	1	Gm19637	gene-Gm19637	51786
chr1	54714262	54714449	188	*	B_WT_peak_68	23	5.02883	6.79022	2.36479	100	Intron (rna-XM_030254991.2/gene-Ankrd44, intron 17 of 27)	1	54720710	54768894	48185	1	4930444A19Rik	rna-XR_004936103.1	-6261
chr1	54964895	54965220	326	*	B_WT_peak_69	24	5.07808	6.87034	2.4179	130	Intron (rna-NM_001081433.3/gene-Ankrd44, intron 1 of 27)	1	54684499	54965546	281048	2	Ankrd44	rna-NM_001081433.3	326
chr1	57621374	57621607	234	*	B_WT_peak_70	20	4.68787	6.24429	2.0966	8	Distal Intergenic	1	57622090	57622231	142	2	LOC115487664	rna-XR_004936788.1	624
chr1	58900993	58901207	215	*	B_WT_peak_71	29	5.60326	7.75245	2.99278	108	Intron (rna-XM_036155019.1/gene-Gm28802, intron 7 of 14)	1	58888950	58935864	46915	2	Gm28802	rna-XM_036155019.1	34657
chr1	59952854	59953033	180	*	B_WT_peak_72	16	4.32333	5.49512	1.62146	75	Exon (rna-NM_001037725.3/gene-Fam117b, exon 1 of 8)	1	59952165	60024507	72343	1	Fam117b	rna-NM_001037725.3	689
chr1	59965412	59965688	277	*	B_WT_peak_73	22	4.93315	6.63554	2.25338	153	Intron (rna-NM_001037725.3/gene-Fam117b, intron 1 of 7)	1	59952165	60024507	72343	1	Fam117b	rna-NM_001037725.3	13247
chr1	60219481	60219795	315	*	B_WT_peak_74	29	5.50971	7.59104	2.92484	206	Promoter (<=1kb)	1	60219499	60377487	157989	1	Nbeal1	rna-XM_006496035.4	0
chr1	62676887	62677063	177	*	B_WT_peak_75	21	4.70916	6.27798	2.11742	111	Exon (rna-XM_006496298.4/gene-Pard3b, exon 24 of 24)	1	62698015	62700879	2865	1	Gm11599	gene-Gm11599	-20952
chr1	63087218	63087409	192	*	B_WT_peak_76	49	6.84843	10.2332	4.95952	119	3' UTR	1	63071865	63071978	114	1	Gm24942	gene-Gm24942	15353
chr1	64702277	64702453	177	*	B_WT_peak_77	31	5.61482	7.94065	3.13379	102	Distal Intergenic	1	64689022	64693169	4148	1	Gm29152	rna-XR_004936144.1	13255
chr1	66856490	66856817	328	*	B_WT_peak_78	35	5.6159	8.46641	3.53478	283	Promoter (<=1kb)	1	66758402	66856754	98353	2	Kansl1l	rna-NM_001122738.1	0
chr1	67107258	67107464	207	*	B_WT_peak_79	18	4.55849	5.87227	1.86271	182	Distal Intergenic	1	67039676	67078049	38374	2	Lancl1	rna-XM_011238435.4	-29209
chr1	69495921	69496170	250	*	B_WT_peak_80	40	6.0588	9.17449	4.07501	122	Distal Intergenic	1	69472821	69483249	10429	1	Gm28497	rna-XR_003947850.1	23100
chr1	70221218	70221393	176	*	B_WT_peak_81	22	4.92368	6.47992	2.21581	48	Intron (rna-NM_029160.3/gene-Spag16, intron 11 of 16)	1	69994163	69994288	126	2	Gm23879	rna-XR_004936853.1	-226930
chr1	70423502	70423693	192	*	B_WT_peak_82	20	4.74624	6.18083	2.05252	38	Intron (rna-NM_029160.3/gene-Spag16, intron 14 of 16)	1	70635974	70636080	107	1	Gm23422	rna-XR_004936701.1	-212281
chr1	70445569	70445878	310	*	B_WT_peak_83	28	5.37894	7.55736	2.89815	198	Intron (rna-NM_029160.3/gene-Spag16, intron 14 of 16)	1	70635974	70636080	107	1	Gm23422	rna-XR_004936701.1	-190096
chr1	72607951	72608141	191	*	B_WT_peak_84	15	4.21811	5.2173	1.59374	4	Intron (rna-XM_006496141.5/gene-Smarcal1, intron 1 of 16)	1	72622366	72668517	46152	1	Smarcal1	rna-XM_011238557.4	-14225
chr1	73776505	73776719	215	*	B_WT_peak_85	32	5.72642	8.12447	3.27423	153	Intron (rna-NR_045311.1/gene-6030407O03Rik, intron 6 of 8)	1	73789384	73865038	75655	2	Gm29183	rna-XR_004936175.1	88319
chr1	73835198	73835375	178	*	B_WT_peak_86	18	4.53606	5.83588	1.83841	92	Intron (rna-NR_045311.1/gene-6030407O03Rik, intron 6 of 8)	1	73789384	73865038	75655	2	Gm29183	rna-XR_004936175.1	29663
chr1	74377508	74377769	262	*	B_WT_peak_87	66	7.031	12.1493	6.6604	72	Intron (rna-XM_006496167.4/gene-Pnkd, intron 2 of 9)	1	74371769	74392851	21083	1	Pnkd	rna-NM_019999.2	5739
chr1	74544918	74545373	456	*	B_WT_peak_88	48	6.45065	10.117	4.86752	222	Promoter (<=1kb)	1	74545192	74570001	24810	1	Cnot9	rna-XM_006496171.4	0
chr1	76030216	76030441	226	*	B_WT_peak_89	15	4.30822	5.3686	1.59742	167	Intron (rna-XR_865555.3/gene-Gm32622, intron 5 of 5)	1	75992121	75995880	3760	2	Gm29065	rna-XR_373553.3	-34336
chr1	76122685	76122949	265	*	B_WT_peak_90	22	4.71824	6.50977	2.21581	162	Distal Intergenic	1	76145088	76196449	51362	1	LOC118567756	rna-XR_004936185.1	-22139
chr1	76507390	76507786	397	*	B_WT_peak_91	13	3.98868	4.84226	1.38172	292	Distal Intergenic	1	76490630	76505269	14640	1	LOC118567757	rna-XR_004936186.1	16760
chr1	77689840	77690045	206	*	B_WT_peak_92	23	5.05334	6.83004	2.38763	88	Distal Intergenic	1	77790280	77892130	101851	1	Gm33030	rna-XR_373561.3	-100235
chr1	78465320	78465534	215	*	B_WT_peak_93	31	5.61482	7.94065	3.13379	108	Promoter (<=1kb)	1	78394595	78465534	70940	2	Farsb	rna-NM_001278075.1	0
chr1	80179294	80179481	188	*	B_WT_peak_94	15	4.26269	5.29184	1.59742	20	Intron (rna-NM_173425.3/gene-Fam124b, intron 1 of 1)	1	80185706	80207331	21626	1	2310015K22Rik	rna-XR_373578.4	-6225
chr1	86286926	86287235	310	*	B_WT_peak_95	27	5.25627	7.36038	2.76222	64	Promoter (<=1kb)	1	86272441	86287177	14737	2	Ncl	rna-NM_010880.3	0
chr1	86510376	86510666	291	*	B_WT_peak_96	33	5.62787	8.20214	3.34021	200	Promoter (<=1kb)	1	86510601	86533986	23386	1	Cops7b	rna-XM_006529625.5	0
chr1	87828821	87829027	207	*	B_WT_peak_97	18	4.58114	5.90912	1.88348	13	5' UTR	1	87835960	87870098	34139	1	Dgkd	rna-XM_017320352.3	-6933
chr1	88182894	88183069	176	*	B_WT_peak_98	13	2.78336	4.75702	1.33432	61	Exon (rna-XM_006529044.3/gene-Mroh2a, exon 30 of 39)	1	88166207	88187858	21652	1	Mroh2a	rna-XM_006529046.3	16687
chr1	91468269	91468467	199	*	B_WT_peak_99	42	6.01066	9.41018	4.26823	83	Promoter (<=1kb)	1	91468287	91487312	19026	1	Asb1	rna-NM_001039126.2	0
chr1	93405915	93406101	187	*	B_WT_peak_100	21	4.58678	6.30404	2.1344	7	Promoter (<=1kb)	1	93333662	93406099	72438	2	Hdlbp	rna-NM_001357556.1	0
[truncated: 2,192 more rows]
