# Supplementary figures and images for: Control of ciliary transcriptional programs during spermatogenesis by antagonistic transcription factors
Source: eLife journal article supplement (doi:10.7554/elife.94754), 2024-04-15

Figure 1

A

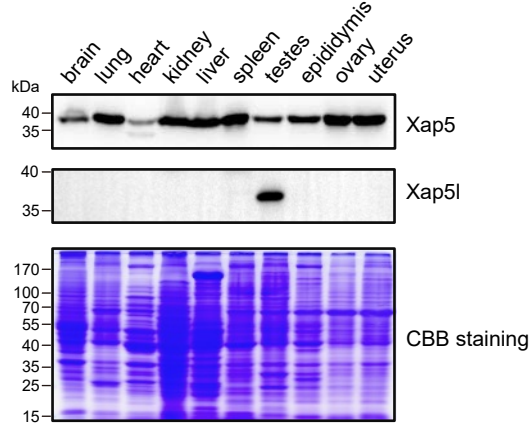

Raw blots:

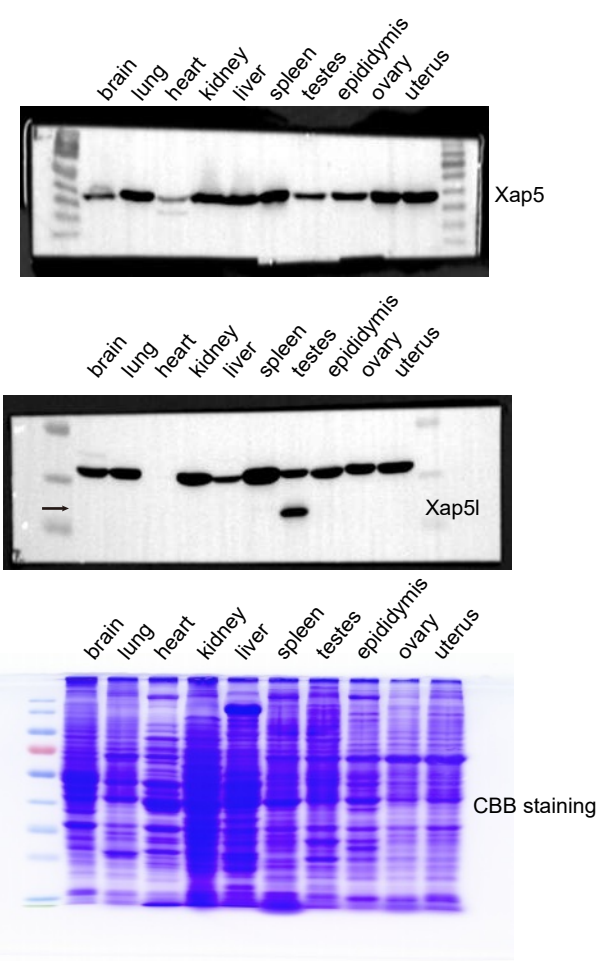

B

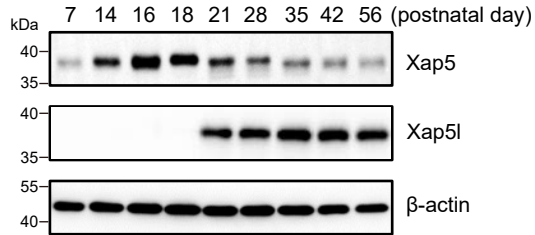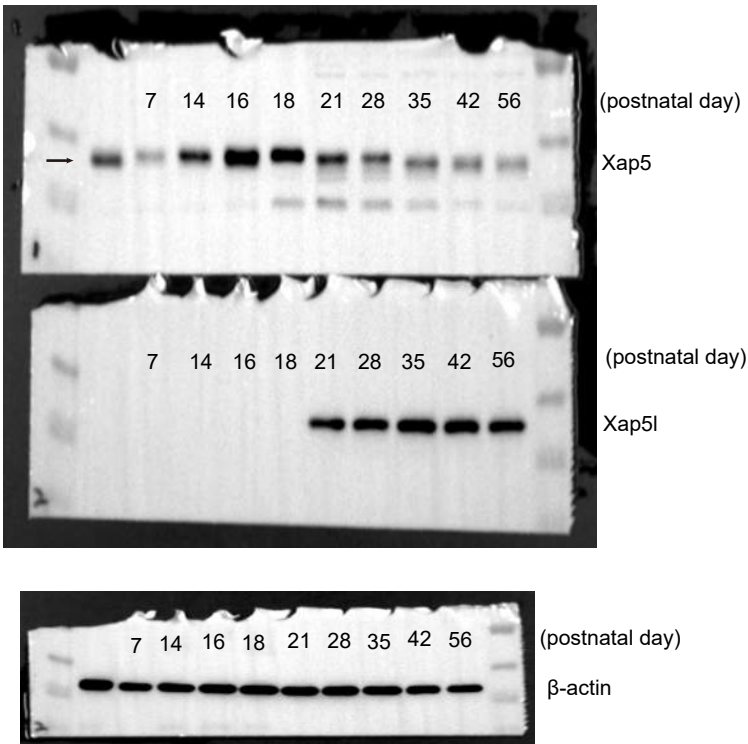

Supplement: fig1-data2 [file elife-94754-fig1-data2-v1.zip]

Figure1—figure supplement 1

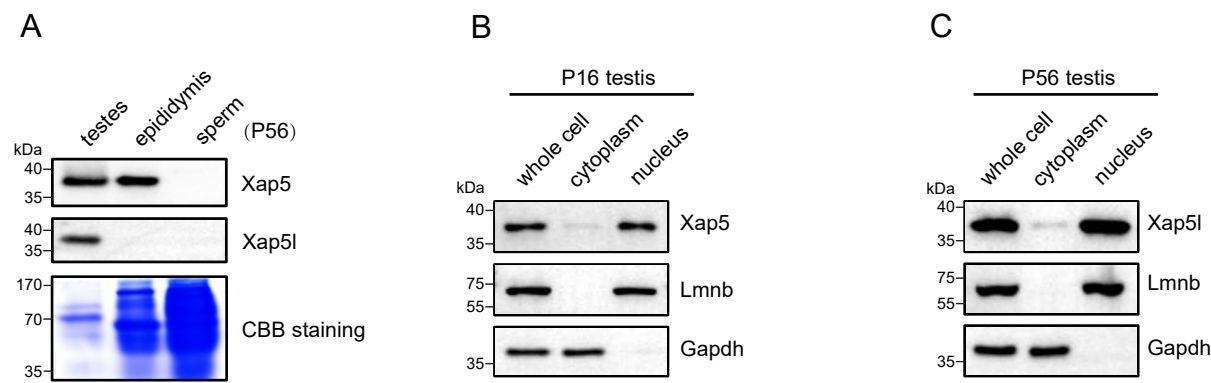

Raw blots:

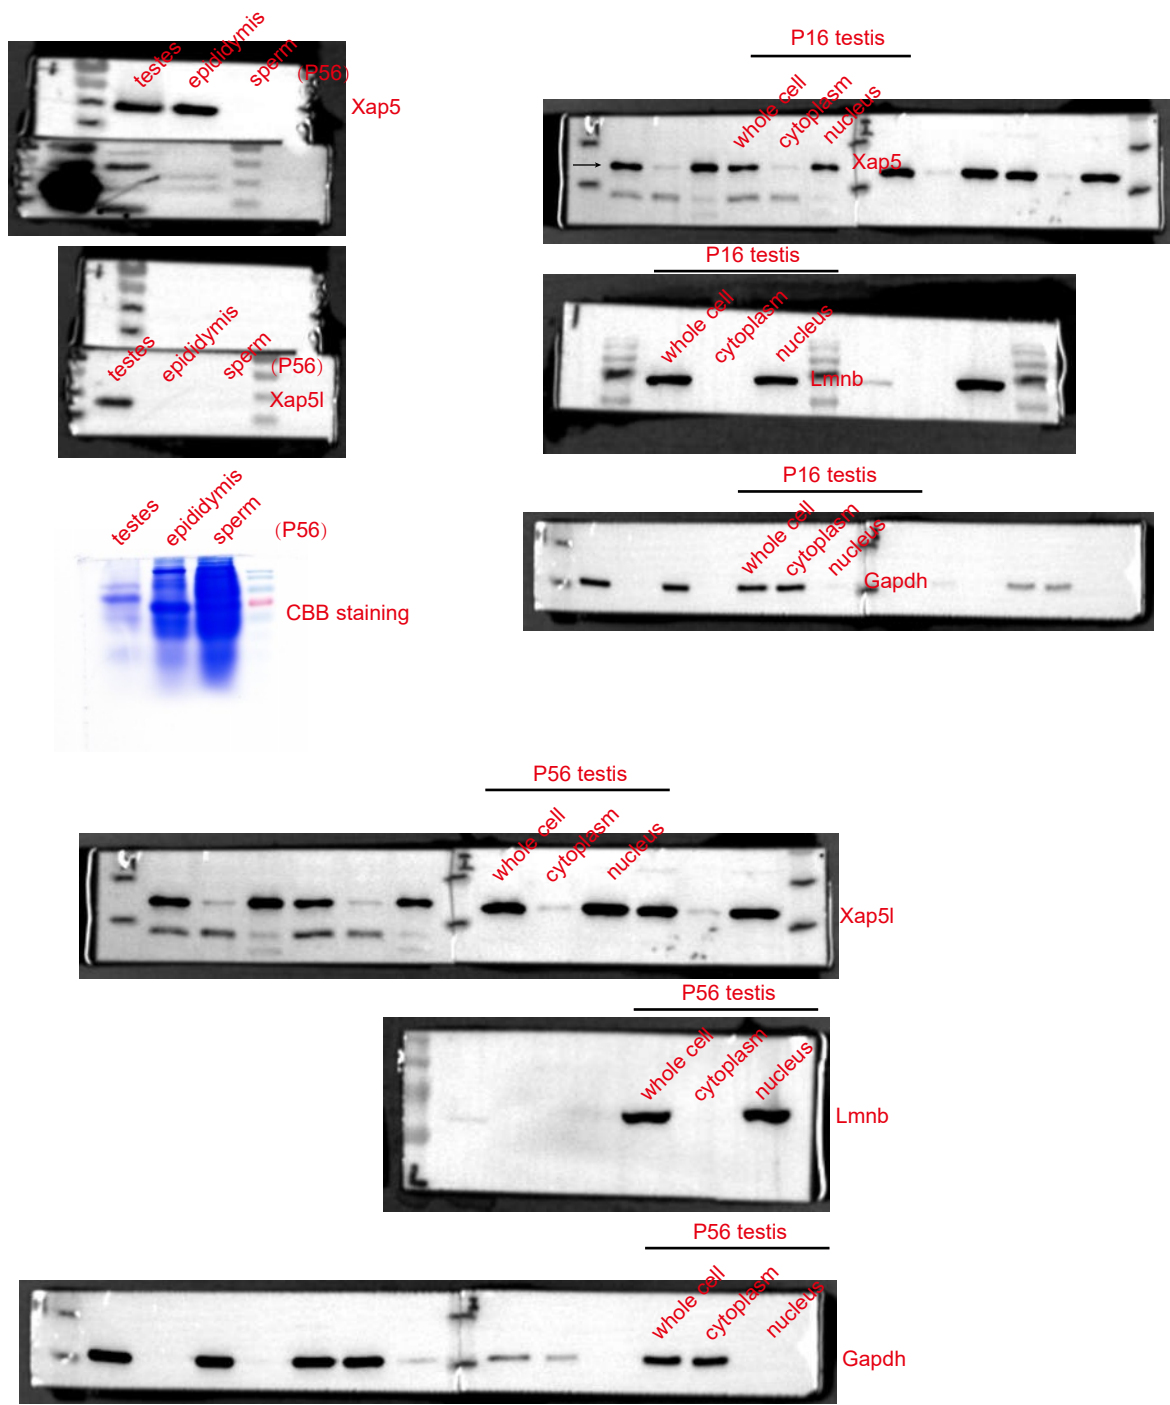

Supplement: fig1-figsupp1-data2 [file elife-94754-fig1-figsupp1-data2-v1.zip]

Figure 1—figure supplement 2

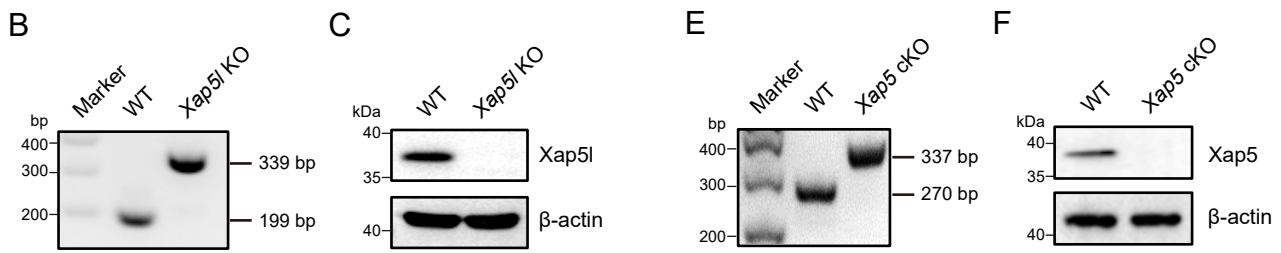

Raw blots:

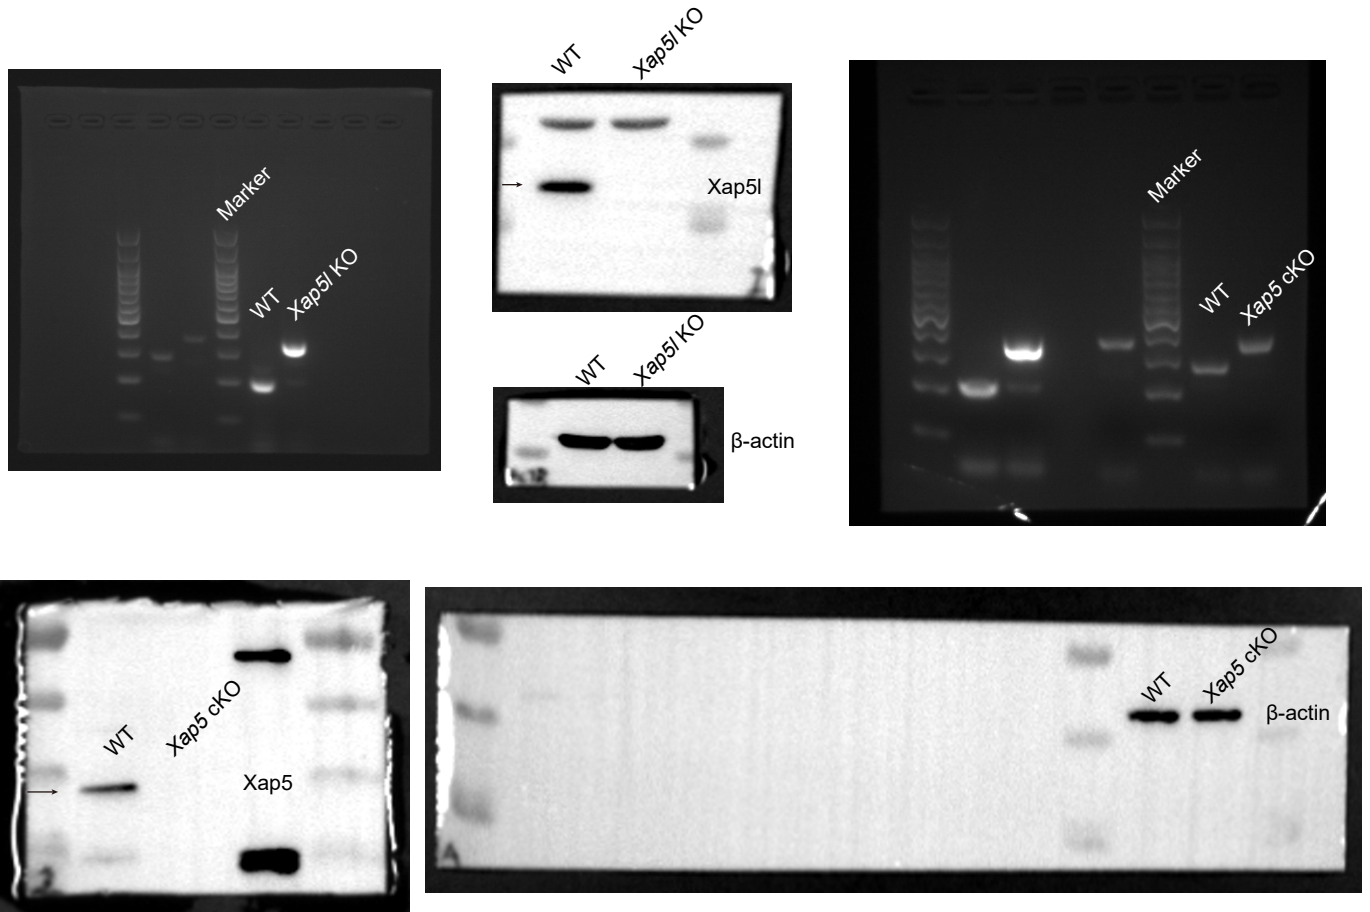

Supplement: fig1-figsupp2-data2 [file elife-94754-fig1-figsupp2-data2-v1.zip]

Figure 4—figure supplement 2A

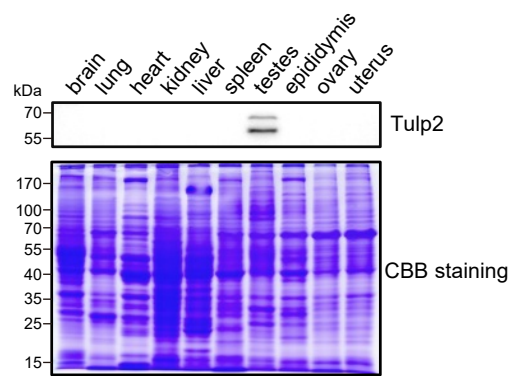

Raw blots:

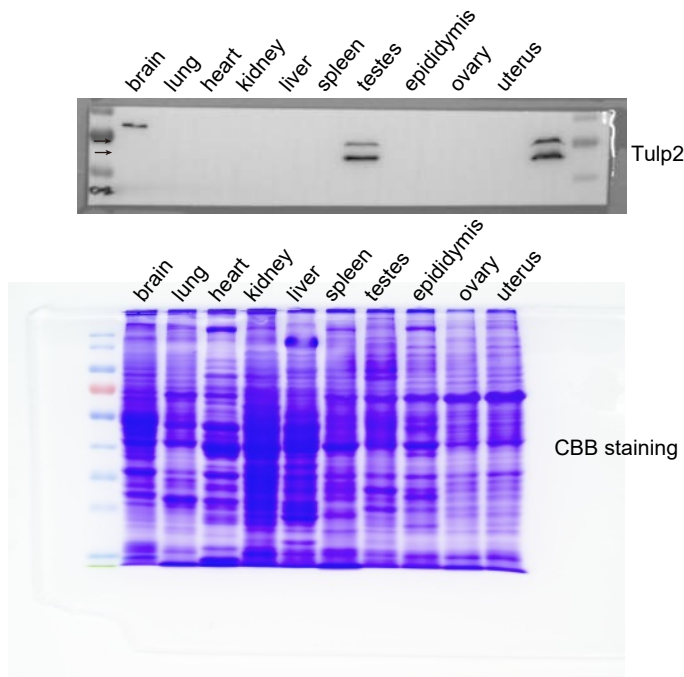

Supplement: fig4-figsupp2-data2 [file elife-94754-fig4-figsupp2-data2-v1.zip]
